# Supplementary material for: Covert Genetic Selections to Optimize Phenotypes
Source: PLoS One. 2007 Nov 21;2(11):e1200. doi: 10.1371/journal.pone.0001200 (PMC2075469; doi:10.1371/journal.pone.0001200)
Supplement: Table S1 — glc30 vs control. For Tables S1, S2, S3, S4, S5 and S6: Full SPI Data Sets. The averaged data are divided into six groups as in Figure 2, comparing S1) Cells cultured in glucose medium at 30°C to t0 samples, S2) Cells cultured in glucose medium at 37°C to t0 samples, S3) Cells cultured in glucose medium at 37°C to cells cultured in glucose medium at 30°C, S4) Cells grown at 30°C in galactose vs 30°C in glucose, S5) Cells grown at 37°C in galactose vs 37°C in glucose, and S6) Cells grown at 37°C in galactose vs 30°C in galactose. The successive columns indicate the Affymetrix identification number interrogated, the Systematic and Gene names, the logarithm of fold change (FC), the t statistic (1/normalized standard deviation), the P value, adjusted P value, and B statistic. (1.82 MB XLS) [file pone.0001200.s006.xls]

## Sheet: glu30VScontrol_allID
ID	YN	Gene	logFC	AveExpr	t	P.Value	adj.P.Val	B
7647_at	YPR115W	NA	-7.31179	4.9102	-29.2197	5.87962e-14	5.48863e-10	21.5405
9971_at	YHR206W	SKN7	-6.25525	4.65573	-16.3617	1.58224e-10	5.47046e-08	14.5691
6177_at	YGR274C	TAF1	-6.01252	4.11489	-24.8853	5.35916e-13	1.66759e-09	19.7312
10761_at	YLR347C	KAP95	-5.90331	3.95926	-18.8157	2.41908e-11	1.4778e-08	16.3394
6377_at	YDR436W	PPZ2	-5.672	4.39583	-14.1702	1.06537e-09	2.28345e-07	12.7218
6517_at	NA	NA	-5.63951	4.22675	-20.6283	6.95395e-12	6.72839e-09	17.482
5974_at	YJL070C	NA	-5.53728	3.8466	-20.574	7.2077e-12	6.72839e-09	17.4495
6604_at	YPL217C	BMS1	-5.51795	4.69446	-16.6813	1.22161e-10	4.75157e-08	14.8161
11005_at	YBL007C	SLA1	-5.48381	5.26004	-15.2523	4.02949e-10	1.13986e-07	13.6692
11321_at	YDR351W	SBE2	-5.48103	7.38754	-6.36203	1.7551e-05	0.000448873	2.89616
4870_at	YLR149C	NA	-5.39227	4.2832	-13.7459	1.58799e-09	3.15402e-07	12.3299
11113_at	YDR303C	RSC3	-5.33153	5.2773	-11.4816	1.62969e-08	2.05583e-06	10.0142
11066_at	YDL126C	CDC48	-5.32079	5.65135	-9.28299	2.3115e-07	1.72623e-05	7.33057
4257_at	YPR026W	ATH1	-5.29421	3.83994	-26.6632	2.07635e-13	9.69137e-10	20.5237
4753_at	YML109W	ZDS2	-5.2828	4.6612	-16.4872	1.4287e-10	5.12958e-08	14.6667
6429_at	YJL047C	RTT101	-5.25759	4.1136	-17.0261	9.28777e-11	4.12863e-08	15.0767
2610_at	YJL080C	SCP160	-5.24872	5.72825	-9.21916	2.51384e-07	1.86243e-05	7.24508
4933_at	YLR072W	NA	-5.24691	5.28965	-13.0245	3.21037e-09	5.25769e-07	11.6349
7987_at	YPR021C	AGC1	-5.21321	4.87372	-17.8821	4.80534e-11	2.36094e-08	15.6988
5200_at	YGR125W	NA	-5.18695	3.89609	-22.3094	2.39158e-12	3.86651e-09	18.4362
7608_at	YMR304W	UBP15	-5.15575	5.40296	-8.72103	4.9121e-07	3.11935e-05	6.56166
5011_at	YBR289W	SNF5	-5.13843	4.57793	-18.9452	2.20478e-11	1.4778e-08	16.4254
9778_at	YGR097W	ASK10	-5.11494	6.89825	-7.42036	3.23235e-06	0.0001284	4.63258
9058_at	YJR031C	GEA1	-5.11403	4.85125	-10.9652	2.92292e-08	3.32749e-06	9.42659
4059_at	YGL014W	PUF4	-5.10529	5.30222	-8.10974	1.161e-06	6.08874e-05	5.68198
3835_s_at	YIL105C	SLM1	-5.06077	3.94185	-8.50074	6.66385e-07	3.9124e-05	6.24999
7443_at	YDL220C	CDC13	-5.02664	3.99522	-13.9065	1.36365e-09	2.82882e-07	12.4797
6687_at	YBR179C	FZO1	-5.02313	6.11705	-14.5008	7.86219e-10	1.9538e-07	13.019
4746_at	YGR233C	PHO81	-5.02175	4.69513	-8.77716	4.54877e-07	2.99034e-05	6.64013
5003_at	YAL002W	VPS8	-5.01342	4.61647	-22.2468	2.48517e-12	3.86651e-09	18.4023
9310_at	YHR120W	MSH1	-4.99839	4.96179	-13.3289	2.37582e-09	4.26506e-07	11.9327
4435_at	YDR505C	PSP1	-4.99506	4.63938	-14.4251	8.42392e-10	2.01634e-07	12.9516
7303_at	YDL035C	GPR1	-4.96812	5.6395	-8.70566	5.01688e-07	3.16436e-05	6.5401
8601_at	YDR097C	MSH6	-4.9214	4.81446	-16.61	1.29364e-10	4.83045e-08	14.7615
5759_at	YDR060W	MAK21	-4.91865	5.80411	-4.66539	0.000363439	0.00386853	-0.204296
2200_at	YJL110C	GZF3	-4.85504	5.38947	-4.66793	0.000361694	0.00385876	-0.1994
11350_at	YGL180W	ATG1	-4.83831	6.39629	-15.189	4.25779e-10	1.16901e-07	13.6158
4750_at	YBR079C	RPG1	-4.79538	5.99623	-10.1356	7.83849e-08	7.54354e-06	8.4295
7728_at	YLR383W	SMC6	-4.78945	4.89572	-9.34461	2.13249e-07	1.6317e-05	7.41266
2609_at	YGR100W	MDR1	-4.77626	4.14862	-20.1807	9.36849e-12	7.95044e-09	17.2114
9476_at	YMR219W	ESC1	-4.76989	3.71389	-21.6516	3.59764e-12	4.79771e-09	18.0739
5041_at	YHR098C	SFB3	-4.76386	4.15645	-13.6645	1.71653e-09	3.33829e-07	12.2533
4360_at	YCL029C	BIK1	-4.7522	6.50181	-6.39052	1.67362e-05	0.000435219	2.94496
4413_at	YKL185W	ASH1	-4.72463	5.38635	-8.98382	3.43818e-07	2.41319e-05	6.92583
11087_at	YKL205W	LOS1	-4.71784	4.47852	-14.1592	1.07629e-09	2.28345e-07	12.7118
11122_at	YHR155W	YSP1	-4.69775	5.61649	-4.88173	0.000241803	0.00295041	0.210684
7546_at	YPR122W	AXL1	-4.65633	5.4025	-7.6859	2.16366e-06	9.84612e-05	5.0442
8216_at	YKL015W	PUT3	-4.61057	5.32955	-4.80151	0.000281058	0.00326953	0.0573766
2116_at	YNL256W	FOL1	-4.60428	3.99502	-16.7499	1.15633e-10	4.69319e-08	14.8684
9615_at	YLR304C	ACO1	-4.5956	5.9034	-6.43628	1.55098e-05	0.000413668	3.02307
7062_at	YIL128W	MET18	-4.58472	7.36232	-15.5517	3.11275e-10	1.00198e-07	13.9188
8607_at	NA	NA	-4.58457	6.59594	-5.58045	6.75503e-05	0.00125364	1.51408
8975_at	YGR270W	YTA7	-4.57736	4.05292	-18.6416	2.74258e-11	1.4778e-08	16.2228
2199_at	YLR057W	NA	-4.56737	5.71567	-4.70415	0.000337715	0.00370454	-0.129603
10465_at	YMR277W	FCP1	-4.56103	7.93997	-6.07665	2.84293e-05	0.00065046	2.40126
9099_at	YGL021W	ALK1	-4.55427	4.83243	-4.0199	0.00126354	0.00958958	-1.46641
9918_at	YHR035W	NA	-4.54258	4.76917	-7.65039	2.28177e-06	0.000101915	4.98972
9769_g_at	YJL089W	SIP4	-4.52755	6.30041	-6.39687	1.65601e-05	0.000433022	2.95581
4192_at	YPR030W	CSR2	-4.51354	3.70648	-23.4125	1.23648e-12	2.88563e-09	19.0138
10006_at	YGR178C	PBP1	-4.49022	4.21892	-11.6004	1.42905e-08	1.82742e-06	10.146
8696_at	YKL057C	NUP120	-4.44692	5.03261	-5.43697	8.73076e-05	0.0015065	1.2514
4942_at	YHR102W	KIC1	-4.43831	6.65536	-6.15342	2.49421e-05	0.00059095	2.53552
3352_s_at	YBR156C	SLI15	-4.41934	7.84649	-5.77852	4.7623e-05	0.000970657	1.87224
10291_at	YPL153C	RAD53	-4.41825	3.79316	-12.4308	5.87828e-09	8.57402e-07	11.034
9329_at	NA	NA	-4.40651	3.67141	-16.8479	1.06946e-10	4.53793e-08	14.9427
6036_at	YNL327W	EGT2	-4.39117	5.88795	-6.21736	2.23809e-05	0.000541258	2.64669
7733_at	YIL144W	TID3	-4.36955	5.64968	-9.35639	2.09996e-07	1.62009e-05	7.42831
6376_at	YCL067C	HMRA2orBUD5orMATALPHA2orHMLALPHA2	-4.36731	3.48694	-19.5169	1.47452e-11	1.14706e-08	16.7965
10233_at	YFL025C	BST1	-4.36549	3.63059	-18.6319	2.76198e-11	1.4778e-08	16.2163
8941_at	YKL126W	YPK1	-4.30508	3.61969	-16.1717	1.84924e-10	6.16524e-08	14.4198
5405_at	YKR028W	SAP190	-4.29617	5.28225	-10.7499	3.75385e-08	4.12261e-06	9.17424
3529_f_at	YFR027W	ECO1	-4.27283	6.03082	-5.21636	0.000130237	0.00197667	0.842359
10930_at	YJR126C	VPS70	-4.2579	4.29913	-7.6787	2.18707e-06	9.86295e-05	5.03317
11184_at	YDR430C	CYM1	-4.25159	5.16683	-4.52141	0.000478103	0.00472284	-0.483009
11009_at	YOL045W	PSK2	-4.24192	5.69838	-10.3505	6.03489e-08	6.12345e-06	8.69435
9562_at	YNR065C	NA	-4.2278	4.14319	-4.6615	0.000366128	0.00388826	-0.211795
10592_at	YGL006W	PMC1	-4.22484	4.52133	-15.3524	3.69435e-10	1.07771e-07	13.7532
8322_at	YHR082C	KSP1	-4.21786	3.8451	-15.3608	3.66756e-10	1.07771e-07	13.7603
5688_at	YLR239C	LIP2	-4.20514	5.41353	-8.1098	1.16089e-06	6.08874e-05	5.68208
4930_at	YDR206W	EBS1	-4.20289	3.62067	-6.95803	6.64509e-06	0.000219194	3.89309
6566_at	NA	NA	-4.20245	6.89431	-6.58718	1.20918e-05	0.000343092	3.27859
4226_at	YJR003C	NA	-4.19982	6.38055	-4.74103	0.000314978	0.00353829	-0.0586575
4464_at	YOR073W	SGO1	-4.19689	4.07857	-12.8966	3.65008e-09	5.77372e-07	11.5076
7778_at	YPL137C	NA	-4.1873	4.68221	-13.4702	2.07009e-09	3.78908e-07	12.0687
9203_at	YMR164C	MSS11	-4.12971	5.14191	-9.5054	1.73118e-07	1.45591e-05	7.62486
4440_at	YDL165W	CDC36	-4.1292	5.2941	-10.6935	4.01053e-08	4.35329e-06	9.10746
7738_at	YDR096W	GIS1	-4.12791	5.87784	-7.88905	1.60105e-06	7.90786e-05	5.35283
6137_at	YBL106C	SRO77	-4.1256	4.53604	-20.8183	6.1388e-12	6.72839e-09	17.5946
6097_at	YLR034C	SMF3	-4.12455	3.6639	-15.037	4.86513e-10	1.26156e-07	13.4864
9527_at	YOR217W	RFC1	-4.10227	6.78898	-5.00357	0.000192708	0.0025194	0.442173
10191_at	YDR499W	LCD1	-4.09633	5.37698	-5.39898	9.34881e-05	0.00159545	1.18141
11166_at	YLR114C	NA	-4.08594	7.62888	-5.8387	4.2871e-05	0.000903388	1.97999
9638_at	NA	NA	-4.085	5.37144	-7.04259	5.81223e-06	0.0002017	4.03053
2615_s_at	YJL129C	TRK1	-4.08457	6.64914	-6.2057	2.28263e-05	0.000549184	2.62647
9768_at	YMR128W	ECM16	-4.08312	4.36132	-7.73521	2.0102e-06	9.42977e-05	5.11961
4205_at	YCR096C	HMRA2orBUD5orMATALPHA2orHMLALPHA2	-4.08125	7.64269	-10.0329	8.8959e-08	8.4738e-06	8.3012
8834_at	YLR205C	HMX1	-4.07262	5.13233	-13.507	1.99772e-09	3.72975e-07	12.1038
9127_at	YIR023W	DAL81	-4.06776	7.45124	-4.7932	0.000285488	0.00330649	0.0414454
5662_at	YLR336C	SGD1	4.06604	6.8298	8.05376	1.25891e-06	6.44802e-05	5.59908
5103_at	YKR086W	PRP16	-4.06324	5.99545	-4.72121	0.00032699	0.00363507	-0.0967569
2614_s_at	YER167W	BCK2	-4.06221	5.0749	-5.48671	7.98518e-05	0.00141445	1.34277
8689_at	NA	NA	-4.03334	5.15006	-4.5151	0.000483914	0.0047606	-0.495279
10468_at	YNL298W	CLA4	-4.02279	5.2268	-4.11976	0.00103932	0.008236	-1.26936
7650_at	YGL139W	NA	4.02187	9.66061	18.5889	2.84953e-11	1.4778e-08	16.1873
10507_at	YGR157W	CHO2	-4.02065	3.86045	-10.6218	4.36453e-08	4.62988e-06	9.02203
5560_at	YER033C	ZRG8	-4.01317	5.49305	-4.094	0.00109295	0.00858087	-1.32014
6787_at	YMR280C	CAT8	-4.0039	5.93916	-5.78086	4.74284e-05	0.000970657	1.87643
8995_at	YOR211C	MGM1	-4.00211	5.48961	-5.10754	0.000159015	0.00226281	0.638372
8777_at	YLR398C	SKI2	-3.99477	8.19934	-5.05812	0.000174192	0.00237385	0.545281
3897_s_at	YGR061C	ADE6	-3.98937	4.27456	-4.6121	0.000402155	0.00416199	-0.307237
5590_at	YIL141W	AXL2	-3.98246	4.29711	-14.4881	7.95332e-10	1.9538e-07	13.0078
6488_at	YGR035C	NA	-3.97227	5.09753	-7.49296	2.89383e-06	0.000118551	4.74605
9924_at	YJL051W	NA	-3.96827	5.8017	-4.98616	0.000199037	0.00257343	0.409192
5046_at	YOL145C	CTR9	-3.946	5.18073	-6.69193	1.01914e-05	0.000301066	3.4541
5572_at	YBL097W	BRN1	-3.94417	4.22542	-8.79713	4.4265e-07	2.93916e-05	6.66796
9524_at	NA	NA	-3.94158	4.36978	-10.6116	4.41775e-08	4.63368e-06	9.00978
4315_at	YGR258C	RAD2	3.94007	10.3302	12.8328	3.89281e-09	5.8612e-07	11.4438
5976_at	YEL031W	SPF1	-3.93828	5.45342	-3.94016	0.0014777	0.0106685	-1.62406
10587_at	YIL075C	RPN2	-3.93287	5.36863	-4.78099	0.000292125	0.00335011	0.0180385
7181_at	YDR208W	MSS4	-3.92805	5.8857	-8.05095	1.26405e-06	6.44802e-05	5.59491
6167_at	YOR127W	RGA1	-3.92014	4.06558	-8.56772	6.07015e-07	3.63236e-05	6.34538
2499_s_at	YPL174C	NIP100	-3.91359	6.00781	-8.88203	3.94415e-07	2.68749e-05	6.78574
4441_at	YNL250W	RAD50	-3.90541	3.7929	-8.75887	4.66393e-07	3.0446e-05	6.6146
10754_at	YPL110C	NA	-3.90394	6.9014	-3.47166	0.00373557	0.0215923	-2.55219
7196_at	YDR293C	SSD1	-3.90312	4.34844	-12.8637	3.77287e-09	5.77372e-07	11.4748
8339_at	YKL024C	URA6	-3.88363	7.15161	-3.61714	0.00279787	0.0173773	-2.26409
2608_at	YKL225W	NA	-3.86682	4.55622	-11.2693	2.06664e-08	2.47335e-06	9.77556
10276_at	YKL179C	COY1	-3.8617	5.20304	-4.5769	0.000430034	0.00438058	-0.375364
2919_s_at	YAL017W	PSK1	-3.8565	5.70046	-9.83564	1.13744e-07	1.04098e-05	8.05178
2198_at	YPR097W	NA	-3.85001	4.99868	-5.17118	0.000141464	0.00209614	0.757847
10968_at	NA	NA	-3.84933	7.32675	-4.96984	0.000205166	0.00263465	0.378252
11108_at	YLR409C	UTP21	-3.84705	9.04244	-6.08621	2.79685e-05	0.000643069	2.41803
5596_at	YDR129C	SAC6	-3.84292	3.60736	-14.2128	1.02406e-09	2.28345e-07	12.7606
2396_at	YLR177W	NA	-3.8415	6.25975	-6.48487	1.43101e-05	0.000388327	3.1057
2397_at	YOR326W	MYO2	-3.84107	5.98303	-6.30713	1.92404e-05	0.000481066	2.80185
10639_at	YGL016W	KAP122	-3.83656	5.35013	-6.38029	1.7024e-05	0.000439004	2.92745
8623_at	YOL051W	GAL11	-3.83312	5.55041	-7.24935	4.20602e-06	0.00015896	4.36245
5339_at	YFR040W	SAP155	-3.83204	4.58112	-9.38699	2.01794e-07	1.58298e-05	7.46888
3136_s_at	NA	NA	-3.82273	5.08667	-4.03	0.00123877	0.00945541	-1.44645
9655_at	YLL016W	SDC25	-3.81752	6.04227	-10.3285	6.19778e-08	6.2211e-06	8.66739
10545_at	YER050C	RSM18	-3.81703	6.09886	-7.72164	2.05125e-06	9.50742e-05	5.09889
10483_at	YCR092C	MSH3	-3.81686	4.92434	-8.16127	1.07798e-06	5.75023e-05	5.75794
2918_s_at	YIL119C	RPI1	-3.81279	5.76297	-7.87141	1.64315e-06	8.01941e-05	5.32624
9355_at	YOL027C	MDM38	-3.81208	6.11483	-3.8446	0.00178371	0.0122704	-1.81324
11426_s_at	YDR507C	GIN4	-3.81033	7.50311	-5.01843	0.000187469	0.00248583	0.470298
3557_s_at	YKR072C	SIS2	-3.80127	3.4156	-4.51019	0.000488479	0.00477982	-0.504812
9046_at	NA	NA	-3.79604	4.27283	-8.38272	7.8648e-07	4.50416e-05	6.08055
9432_at	YOL138C	NA	-3.78803	6.03973	-5.0214	0.000186442	0.00248114	0.475908
5179_at	YPR040W	TIP41	-3.7858	5.39602	-4.73395	0.000319218	0.00357731	-0.0722708
5615_at	YDL214C	PRR2	3.78237	7.31268	6.64413	1.10164e-05	0.000317401	3.3742
10087_at	YMR189W	GCV2	3.78128	8.85408	13.1286	2.89447e-09	4.82499e-07	11.7375
8586_at	YLR166C	SEC10	-3.77454	5.07317	-9.37446	2.05112e-07	1.5956e-05	7.45228
6263_at	YOL087C	NA	-3.76458	6.36855	-6.68273	1.03449e-05	0.000304542	3.43876
2498_s_at	NA	NA	-3.76066	5.7121	-10.9939	2.82795e-08	3.29986e-06	9.45987
7807_at	YER114C	BOI2	-3.75393	7.1718	-7.14018	4.98585e-06	0.00018172	4.18792
3249_s_at	NA	NA	-3.74781	4.76569	-3.90813	0.00157382	0.0111384	-1.68745
11250_s_at	YIL130W	NA	-3.74609	3.96535	-4.3899	0.000615414	0.00565999	-0.739185
4228_at	YPL070W	MUK1	-3.73664	6.93813	-4.39897	0.00060476	0.00559213	-0.72148
8364_at	YPR111W	DBF20	-3.71617	6.42436	-5.03636	0.000181347	0.00243579	0.504191
6096_at	YPL216W	NA	-3.71469	7.67417	-12.007	9.19096e-09	1.26173e-06	10.588
7762_at	YPR194C	OPT2	-3.70232	3.89824	-9.11437	2.88785e-07	2.1061e-05	7.10371
6655_at	YNL091W	NST1	3.70198	7.43311	11.7664	1.19154e-08	1.589e-06	10.3282
4363_at	YKR082W	NUP133	-3.69863	3.73226	-9.44563	1.87011e-07	1.51804e-05	7.54632
9933_at	YOL075C	NA	-3.69598	5.11495	-4.45045	0.000547756	0.00518591	-0.621066
4539_at	YDL194W	SNF3	-3.6956	4.47231	-6.96574	6.56425e-06	0.000219074	3.90566
4734_at	YKL092C	BUD2	-3.69438	6.32453	-7.63554	2.33318e-06	0.000102668	4.96687
7988_at	YAL035W	FUN12	-3.69259	5.26752	-4.51329	0.000485589	0.00477082	-0.498786
9141_at	NA	NA	-3.68523	5.41891	-3.6101	0.00283722	0.0175633	-2.27804
11229_at	YGL227W	VID30	-3.67284	4.45294	-5.19265	0.000136008	0.00204064	0.798043
7941_at	YDR269C	NA	-3.66416	4.77552	-11.3766	1.83197e-08	2.25018e-06	9.89671
3315_f_at	YKL020C	SPT23	-3.6628	4.35676	-4.21931	0.000856111	0.00711014	-1.07343
3798_s_at	YNL267W	PIK1	-3.6546	7.16767	-5.69618	5.5036e-05	0.0010816	1.72397
2395_at	YHR201C	PPX1	-3.65189	5.85216	-7.13888	4.99596e-06	0.00018172	4.18584
10880_at	YJR089W	BIR1	-3.64803	8.90119	-4.78244	0.000291325	0.00334688	0.0208318
9707_at	YOR195W	SLK19	-3.6416	6.75118	-5.34925	0.000102277	0.00168983	1.08948
5157_at	YKL064W	MNR2	-3.63758	5.67371	-3.83431	0.0018203	0.0124579	-1.83363
4189_at	YMR261C	TPS3	-3.63378	4.71873	-9.80615	1.1804e-07	1.06981e-05	8.01413
7480_at	YDL145C	COP1	-3.62591	6.19062	-2.98008	0.00992796	0.0440692	-3.51634
10088_at	NA	NA	-3.62585	8.26281	-3.55716	0.00315169	0.0191419	-2.38293
5150_at	NA	NA	-3.61877	5.2322	-9.62327	1.4883e-07	1.27948e-05	7.77861
7400_at	NA	NA	-3.61845	6.6501	-7.58112	2.53229e-06	0.000108435	4.88291
4961_at	YNL102W	POL1	3.6167	5.11097	8.89426	3.87938e-07	2.6628e-05	6.80263
11358_at	YDL090C	RAM1	-3.61652	5.41934	-5.47588	8.14174e-05	0.00143132	1.32289
4833_at	YPL115C	BEM3	-3.60386	7.61181	-4.23283	0.00083392	0.00697954	-1.04687
6593_at	YJL094C	KHA1	-3.60127	5.44103	-5.36949	9.85995e-05	0.00164069	1.12694
9724_at	YLR096W	KIN2	-3.58751	6.68455	-5.16372	0.000143414	0.00211162	0.743863
9461_at	YHR086W	NAM8	-3.57859	3.79497	-7.36098	3.54032e-06	0.000137132	4.53923
2818_at	NA	NA	-3.57463	4.49418	-3.50555	0.00349213	0.0206584	-2.48513
9201_at	YDL046W	NA	-3.56799	6.41468	-4.42637	0.000573696	0.00536081	-0.668003
8352_at	YGL156W	AMS1	-3.56634	3.51524	-17.5311	6.27353e-11	2.92817e-08	15.4479
2197_s_at	YKL050C	NA	-3.56048	4.58876	-13.2552	2.55407e-09	4.49853e-07	11.8612
7706_at	YJR073C	OPI3	-3.54476	5.49678	-4.13535	0.00100817	0.00805498	-1.23864
2776_at	YOR256C	NA	-3.54418	3.99732	-12.3112	6.65971e-09	9.56437e-07	10.9096
5230_at	YOR017W	PET127	-3.53943	3.57351	-5.21552	0.000130437	0.00197667	0.840787
8328_at	YMR125W	STO1	-3.51968	8.0534	-6.12922	2.59904e-05	0.000608071	2.49328
5968_at	YPR105C	COG4	-3.50674	4.84658	-6.01279	3.1718e-05	0.000713464	2.28898
6189_at	YBR038W	CHS2	-3.50088	9.22787	-11.455	1.67852e-08	2.0892e-06	9.98457
3006_at	YLR218C	NA	-3.48807	3.55112	-8.17216	1.06125e-06	5.69352e-05	5.77396
10266_at	YGL073W	HSF1	-3.48272	5.59935	-7.32227	3.75761e-06	0.000144351	4.47812
8656_at	YPR119W	CLB2	-3.4799	6.15654	-3.06321	0.00841854	0.0390675	-3.35494
2735_s_at	YMR076C	PDS5	-3.47756	4.0569	-8.14552	1.10266e-06	5.84847e-05	5.73477
10089_at	YDL127W	PCL2	-3.47674	5.59987	-3.18338	0.00662984	0.032885	-3.12019
4987_at	YDR416W	SYF1	-3.4702	4.4686	-8.79499	4.43943e-07	2.93916e-05	6.66498
6630_at	YJR035W	RAD26	-3.46643	5.90396	-8.74278	4.7678e-07	3.05297e-05	6.59211
10891_at	YLR039C	RIC1	-3.46596	6.60322	-5.26223	0.000119782	0.00187612	0.927902
10067_at	YLR138W	NHA1	-3.46313	3.68559	-6.77691	8.88119e-06	0.000269243	3.59536
4825_at	NA	NA	-3.44584	4.87704	-4.90375	0.000232054	0.00285029	0.252643
6175_at	YIR002C	MPH1	-3.44029	4.57929	-3.92535	0.00152138	0.0108829	-1.65337
7114_at	YGL094C	PAN2	3.4387	9.46637	10.3781	5.83733e-08	5.98808e-06	8.72803
9656_g_at	YDR356W	SPC110	-3.4357	7.83443	-13.1514	2.82961e-09	4.80261e-07	11.7599
3005_at	YGR094W	VAS1	-3.41998	3.49443	-8.01756	1.32684e-06	6.69518e-05	5.54526
11183_at	YJR147W	HMS2	3.41788	10.1986	18.6411	2.74367e-11	1.4778e-08	16.2225
6722_at	YGL089C	MF(ALPHA)2	-3.40939	6.98702	-3.66108	0.00256434	0.0162955	-2.177
10077_at	NA	NA	-3.39948	4.66966	-2.62438	0.0199929	0.0743559	-4.19408
9954_at	YJL222W	VTH2orVTH1	-3.3992	8.14557	-4.35223	0.000661789	0.00594591	-0.812819
7385_at	NA	NA	-3.39448	5.98852	-9.07435	3.04589e-07	2.20413e-05	7.04939
7870_at	YLL005C	SPO75	-3.37757	6.93786	-2.84826	0.0128847	0.0530799	-3.77021
3250_s_at	YBR281C	NA	-3.37514	4.67893	-3.92445	0.00152407	0.0108854	-1.65514
8008_at	YLR176C	RFX1	-3.36789	3.35894	-11.3017	1.99242e-08	2.41548e-06	9.81234
7888_at	YKL210W	UBA1	-3.36771	7.63129	-3.4609	0.00381634	0.0219504	-2.57347
4468_at	YJL127C	SPT10	-3.36305	5.10826	-5.50813	7.6849e-05	0.00137694	1.38201
10619_at	YNL201C	PSY2	-3.36187	5.93113	-6.25342	2.10592e-05	0.000515978	2.70916
11425_s_at	YOR253W	NAT5	-3.36182	7.14071	-5.15792	0.000144947	0.00212554	0.733001
4890_at	YMR016C	SOK2	-3.36169	5.6581	-7.15679	4.85798e-06	0.000179246	4.21458
3512_f_at	YNR031C	SSK2	-3.36134	5.34936	-4.4906	0.000507154	0.00489079	-0.542903
8419_at	YNL130C	CPT1	-3.35617	4.25981	-6.59797	1.18799e-05	0.000340179	3.29674
10212_at	YBL105C	PKC1	-3.3507	6.86705	-5.32944	0.000106012	0.00173007	1.05279
10928_at	YIL002C	INP51	-3.34346	5.10969	-6.29343	1.9688e-05	0.000488798	2.77825
8277_at	YNL127W	FAR11	-3.33444	6.04995	-3.61974	0.00278347	0.017334	-2.25894
11374_at	YJL028W	NA	-3.3274	6.95324	-6.65654	1.07957e-05	0.000312973	3.39498
6903_at	YPL183C	NA	-3.32471	4.85916	-13.7674	1.55579e-09	3.15402e-07	12.3501
2775_at	YCR106W	RDS1	-3.31492	3.70981	-10.2642	6.69987e-08	6.58351e-06	8.58852
8704_at	YGR143W	SKN1	-3.30845	6.50176	-5.40361	9.2711e-05	0.00158799	1.18995
5247_at	YPR118W	NA	3.30411	9.22057	10.6745	4.10124e-08	4.40059e-06	9.08488
6653_at	YOL021C	DIS3	-3.29745	5.22196	-7.59083	2.49548e-06	0.000107352	4.89792
3007_at	YJR132W	NMD5	-3.29275	4.77894	-7.56009	2.61398e-06	0.000110854	4.85035
7139_at	YBL052C	SAS3	-3.29031	6.02507	-3.9438	0.00146716	0.0106005	-1.61686
9031_at	YOR207C	RET1	-3.28632	6.43183	-3.40203	0.00429057	0.0241105	-2.68983
11007_at	YPL020C	ULP1	-3.27368	5.77994	-3.25743	0.00572154	0.0296396	-2.97484
7932_at	NA	NA	-3.27145	5.3106	-5.58558	6.69371e-05	0.0012452	1.52342
7356_at	NA	NA	-3.26912	8.3148	-6.38857	1.67908e-05	0.000435396	2.94161
3892_s_at	YPR032W	SRO7	-3.26292	3.95468	-4.85999	0.000251847	0.00302184	0.169198
2734_s_at	YKL031W	NA	-3.26244	4.18413	-8.64189	5.47746e-07	3.40881e-05	6.45037
11260_at	YDL231C	BRE4	-3.26087	7.5274	-6.10662	2.7011e-05	0.000623464	2.45376
6958_s_at	YJL197W	UBP12	3.25844	5.0552	9.04012	3.18832e-07	2.25477e-05	7.00279
9566_at	NA	NA	-3.25214	4.48236	-5.64511	6.02303e-05	0.00114511	1.63157
9776_at	YOR249C	APC5	-3.25187	4.52125	-4.092	0.00109724	0.00859286	-1.32409
9115_at	YNL329C	PEX6	-3.24915	5.84152	-6.29954	1.94871e-05	0.000485099	2.78877
9962_at	YLR129W	DIP2	-3.24876	6.0873	-4.28285	0.000756809	0.00652623	-0.948691
8996_at	YLR404W	NA	-3.24683	3.34094	-11.9292	9.99082e-09	1.35166e-06	10.5046
2733_g_at	YDL223C	HBT1	-3.24108	3.77547	-9.05917	3.10819e-07	2.23192e-05	7.02874
9138_at	NA	NA	-3.23742	5.60141	-5.55545	7.06238e-05	0.00129269	1.46851
4843_at	YDR128W	NA	-3.23552	5.31374	-8.17718	1.05362e-06	5.6853e-05	5.78133
4260_at	YHR103W	SBE22	3.22548	9.30029	6.84545	7.95379e-06	0.000248546	3.70857
3789_s_at	YML049C	RSE1	-3.2239	7.85796	-4.79782	0.000283017	0.00328602	0.0503022
9337_at	YER132C	PMD1	-3.22339	7.64271	-4.76724	0.000299789	0.00342032	-0.00833546
6800_at	YBR150C	TBS1	-3.22316	7.202	-3.98254	0.00135964	0.0100308	-1.54025
9528_at	YER105C	NUP157	-3.21992	3.74848	-5.50431	7.73761e-05	0.00137921	1.37502
4254_at	YCR011C	ADP1	-3.21987	5.08769	-4.88241	0.000241499	0.00295041	0.211967
5242_at	YPL133C	RDS2	-3.21745	6.49341	-4.27883	0.000762732	0.00655023	-0.956583
6455_s_at	YNL167C	SKO1	-3.21682	4.38334	-7.59434	2.48232e-06	0.00010728	4.90335
7673_at	YKR049C	NA	-3.21461	9.00455	-4.4284	0.000571461	0.00535601	-0.664044
11424_g_at	YDR359C	VID21	-3.21267	6.51451	-5.55079	7.12128e-05	0.00130092	1.46001
10215_at	YPR120C	CLB5	-3.21247	7.14051	-4.89578	0.000235535	0.00288925	0.237459
6067_at	YKL165C	MCD4	-3.21166	6.60176	-5.2322	0.000126523	0.00192989	0.871931
4952_at	YOR346W	REV1	-3.2083	3.93041	-4.32002	0.000704285	0.00621254	-0.875865
6669_at	YBR249C	ARO4	-3.20639	5.04549	-7.10283	5.28645e-06	0.000186928	4.12785
7481_at	YJL154C	VPS35	-3.20554	4.91039	-8.05631	1.25426e-06	6.44802e-05	5.60287
5765_at	YJL056C	ZAP1	-3.20497	4.53984	-5.25916	0.000120454	0.00188347	0.922186
6888_at	YLR153C	ACS2	-3.20352	5.87915	-6.58024	1.22303e-05	0.000345181	3.26691
3916_s_at	YIL141W	AXL2	-3.2022	6.10433	-4.67604	0.000356174	0.00383659	-0.183754
3854_f_at	YOR221C	MCT1	3.20105	7.06516	6.75632	9.1815e-06	0.000274709	3.56123
7636_at	YLR450W	HMG2	-3.1994	7.89391	-3.61071	0.00283381	0.0175633	-2.27684
8645_at	YIL112W	HOS4	-3.18466	6.50142	-4.92517	0.000222963	0.00277514	0.293397
2613_s_at	YPL036W	PMA2	-3.18043	4.26574	-4.23914	0.000823761	0.0069256	-1.03447
4196_at	YOR227W	NA	-3.17762	3.59418	-14.2728	9.68868e-10	2.26109e-07	12.8148
5262_at	YPR010C	RPA135	-3.17578	8.43673	-4.67669	0.000355735	0.00383659	-0.1825
8893_at	YMR172W	HOT1	-3.17081	6.25181	-4.65958	0.000367463	0.00389273	-0.215497
10338_at	YDR270W	CCC2	-3.16835	5.81245	-5.27131	0.000117817	0.00186051	0.944819
6364_at	YAL053W	NA	-3.16673	4.11707	-8.74942	4.72467e-07	3.05297e-05	6.60139
7865_at	YPL147W	PXA1	-3.15645	7.04743	-4.42646	0.000573592	0.00536081	-0.667819
7347_at	YOR349W	CIN1	-3.14946	7.41434	-3.0614	0.00844888	0.0391726	-3.35847
8190_at	YML076C	WAR1	-3.14652	5.91547	-3.83802	0.00180704	0.0123943	-1.82629
4083_at	YLR146C	SPE4	-3.14218	9.25386	-4.70149	0.000339414	0.00370632	-0.134711
2724_s_at	YLR272C	YCS4	-3.14119	4.28427	-4.04697	0.00119828	0.00920651	-1.41295
2856_at	YHR158C	KEL1	-3.13918	4.55624	-5.92785	3.67217e-05	0.000806582	2.13874
3114_s_at	YKR009C	FOX2	-3.13146	6.5043	-5.06549	0.000171837	0.00235882	0.559181
4459_at	YKL022C	CDC16	-3.12847	3.76861	-10.8614	3.29615e-08	3.66304e-06	9.30543
8193_at	YDL056W	MBP1	-3.12557	6.61793	-3.37892	0.00449256	0.0249038	-2.73548
7354_at	NA	NA	-3.12455	5.08012	-7.49494	2.88511e-06	0.000118551	4.74915
3588_f_at	YGR102C	NA	-3.12454	5.95459	-5.6026	6.49429e-05	0.00122226	1.5544
6467_at	YGR224W	AZR1	-3.12036	7.28152	-3.63246	0.00271406	0.0170659	-2.23371
5045_at	YGR078C	PAC10	3.11531	7.65008	8.45907	7.06403e-07	4.12142e-05	6.19036
11062_at	YJL176C	SWI3	-3.11263	6.84852	-4.18647	0.000912576	0.00744008	-1.138
9415_at	YGR107W	NA	-3.11115	5.66742	-3.85411	0.00175056	0.0120958	-1.7944
2760_at	YGR261C	APL6	-3.10854	4.22082	-7.23585	4.29507e-06	0.000161022	4.34096
8582_at	YDL045W-A	MRP10	-3.10641	7.31809	-6.23289	2.18012e-05	0.000531368	2.67362
10647_at	YKR041W	NA	-3.10575	7.32344	-3.99059	0.00133831	0.00993884	-1.52432
4247_at	YDL019C	OSH2	3.10465	9.19215	5.03291	0.000182508	0.00244786	0.497676
10902_at	YDL093W	PMT5	-3.10381	5.9983	-3.27237	0.00555385	0.0290124	-2.94545
10156_at	YLR240W	VPS34	-3.10246	4.76316	-7.04785	5.76427e-06	0.000200781	4.03904
10765_at	YIL017C	VID28	-3.0976	9.03338	-3.45638	0.0038508	0.0220671	-2.58241
10248_at	YDL190C	UFD2	-3.09756	6.19295	-4.51133	0.00048742	0.00477948	-0.502607
9854_at	YPL245W	NA	-3.09392	8.13707	-3.8155	0.00188915	0.0127791	-1.87089
2761_at	YBL022C	PIM1	-3.09187	3.90655	-5.71218	5.35065e-05	0.00106137	1.75285
6472_at	YKR099W	BAS1	-3.07827	3.42838	-9.95429	9.8068e-08	9.24712e-06	8.20231
10176_at	YDR301W	CFT1	3.076	8.44055	9.87968	1.07635e-07	9.94828e-06	8.10783
8532_at	YGL223C	COG1	-3.07566	4.69746	-5.0713	0.000170003	0.00234413	0.57014
7915_at	YPL025C	NA	-3.07233	6.35384	-4.96263	0.000207934	0.00265535	0.364579
2823_at	YDR305C	HNT2	-3.07168	5.36371	-9.47933	1.79037e-07	1.46606e-05	7.59066
5665_at	NA	NA	3.06793	6.74931	8.35155	8.21875e-07	4.64819e-05	6.03552
9087_at	YIL154C	IMP2'	-3.06203	5.54449	-4.41296	0.00058868	0.00547889	-0.694153
2319_f_at	YJR021C	REC107	-3.06041	4.16772	-3.05692	0.0085244	0.0394327	-3.36719
2648_at	YCL030C	HIS4	-3.0546	4.6179	-5.65209	5.94913e-05	0.00113968	1.64422
4319_at	YLR389C	STE23	-3.0527	5.25691	-14.1896	1.04637e-09	2.28345e-07	12.7395
4869_at	YML068W	ITT1	3.0509	10.3575	12.1186	8.16003e-09	1.13692e-06	10.7069
7649_at	NA	NA	-3.04814	4.03112	-2.32205	0.0358041	0.115332	-4.74675
3790_s_at	YFR045W	NA	-3.04561	8.42667	-4.18238	0.000919877	0.00748653	-1.14605
11104_at	YLR381W	CTF3	-3.04348	6.11031	-6.4905	1.41776e-05	0.000385854	3.11524
9584_at	YNL186W	UBP10	-3.03994	8.05528	-2.95273	0.0104806	0.0457395	-3.56923
10168_at	YPL136W	NA	-3.03592	6.13335	-6.44957	1.51714e-05	0.000406968	3.04571
3891_s_at	YGR200C	ELP2	-3.03569	3.57441	-5.7829	4.72596e-05	0.000970657	1.88009
9336_at	NA	NA	-3.034	5.92082	-3.98385	0.00135614	0.0100234	-1.53765
6334_at	YDR395W	SXM1	-3.02972	8.63646	-7.32924	3.71748e-06	0.000143399	4.48913
5235_at	YMR218C	TRS130	-3.02784	4.50226	-5.78098	4.74188e-05	0.000970657	1.87664
10372_at	YKL176C	LST4	-3.02418	5.13106	-5.6453	6.02096e-05	0.00114511	1.63192
3307_s_at	YGL013C	PDR1	-3.02138	6.84292	-4.58598	0.000422661	0.00432625	-0.35779
2947_s_at	YBR055C	PRP6	-3.01661	4.39046	-3.05238	0.00860157	0.039711	-3.37603
11332_at	NA	NA	-3.01382	5.37528	-5.05461	0.000175328	0.00238262	0.538645
11351_at	YAL051W	OAF1	-3.00242	3.9445	-6.12045	2.63813e-05	0.000614139	2.47796
9163_at	YMR190C	SGS1	-3.00123	6.02125	-5.48318	8.03596e-05	0.00141807	1.33628
7889_at	YKR021W	NA	-2.99959	7.61639	-3.79331	0.00197381	0.0132253	-1.91488
3722_s_at	NA	NA	-2.99877	4.68094	-5.28549	0.000114816	0.00183215	0.971196
2917_s_at	YLR249W	YEF3	-2.99804	3.9761	-8.58101	5.95912e-07	3.60275e-05	6.36424
6361_at	NA	NA	2.99156	6.61219	5.76353	4.88908e-05	0.000981495	1.84531
10143_at	YGL233W	SEC15	2.99032	7.71389	6.56927	1.24523e-05	0.000350127	3.24844
4222_at	NA	NA	2.98394	5.14576	5.58897	6.65349e-05	0.00124221	1.52959
11368_at	YKL173W	SNU114	-2.98389	5.52566	-3.82218	0.00186443	0.0126486	-1.85768
7170_at	YER111C	SWI4	2.98076	8.37754	15.1032	4.59009e-10	1.22424e-07	13.5429
6518_at	YJR109C	CPA2	-2.97989	3.51504	-12.7375	4.28794e-09	6.35364e-07	11.3478
9460_at	YPL176C	NA	-2.97369	7.05213	-3.03099	0.00897449	0.0410016	-3.4176
10203_at	YIL134W	FLX1	-2.97179	6.34335	-3.93785	0.00148443	0.0106922	-1.62863
3441_f_at	YBR073W	RDH54	-2.95823	5.03214	-4.45839	0.000539465	0.00514393	-0.60559
10867_s_at	YHL023C	RMD11	-2.95732	3.49704	-13.5183	1.97594e-09	3.72975e-07	12.1146
6190_at	YJR091C	JSN1	-2.95632	8.26322	-6.12428	2.621e-05	0.000611675	2.48465
3015_at	YMR167W	MLH1	-2.94935	5.47423	-4.48279	0.000514804	0.00494923	-0.558102
3148_s_at	YBR005W	RCR1	2.9489	6.87911	4.95586	0.000210571	0.00268169	0.351721
8500_at	YEL033W	NA	-2.93944	4.62934	-8.42171	7.44447e-07	4.31641e-05	6.13672
7923_at	YIL073C	SPO22	-2.93537	5.37501	-6.95967	6.62786e-06	0.000219194	3.89576
5344_at	YNL072W	RNH201	-2.93476	5.13829	-5.69446	5.52031e-05	0.00108261	1.72087
10484_at	YMR086W	NA	-2.9277	5.51146	-3.2966	0.00529241	0.0279913	-2.89778
11205_i_at	NA	NA	2.92467	8.8323	8.23862	9.64929e-07	5.29859e-05	5.87134
10585_at	YNL049C	SFB2	-2.92211	6.06488	-3.71969	0.00228318	0.0147907	-2.0608
11112_at	YKL163W	PIR3	-2.91616	8.90456	-4.46481	0.000532865	0.00510708	-0.593097
9939_at	YDL177C	NA	2.91293	8.3072	6.96508	6.57106e-06	0.000219074	3.90459
2887_s_at	YML061C	PIF1	-2.91274	6.41334	-7.20486	4.50706e-06	0.000168294	4.29152
2235_at	YNL085W	MKT1	-2.91229	6.87487	-3.59241	0.0029386	0.0180977	-2.31309
10746_at	YMR001C	CDC5	-2.90864	6.22227	-5.06239	0.000172825	0.00235882	0.553325
5768_at	YJR143C	PMT4	-2.90633	3.12579	-4.76024	0.000303769	0.00344973	-0.0217638
9401_at	YJR039W	NA	-2.90314	7.94439	-4.30619	0.00072338	0.00631423	-0.902955
8220_at	YBL085W	BOI1	-2.90156	3.47488	-8.29926	8.85099e-07	4.9181e-05	5.9597
4555_at	YHR079C	IRE1	-2.89042	3.82323	-10.446	5.38027e-08	5.58054e-06	8.81052
4790_at	YAR014C	BUD14	-2.88566	6.6666	-6.32422	1.86969e-05	0.000470774	2.83126
2742_s_at	NA	NA	-2.88494	3.39608	-4.91171	0.000228633	0.00282498	0.267788
11193_at	YLR075W	RPL10	-2.88095	9.78877	-5.24729	0.000123087	0.00189767	0.900076
6933_at	YPL126W	NAN1	2.87707	9.72128	3.99535	0.00132588	0.00991755	-1.51492
8983_s_at	YMR288W	HSH155	-2.87632	6.48486	-4.10161	0.00107681	0.00848719	-1.30513
9400_at	YFL032W	HAC1	-2.87484	4.45889	-7.64614	2.29637e-06	0.000102079	4.98318
4858_at	NA	NA	-2.87463	6.07212	-5.30819	0.000110178	0.00177636	1.01336
5004_at	YKR098C	UBP11	-2.86681	8.2826	-4.83577	0.000263543	0.00313397	0.122936
9449_at	YOR005C	DNL4	-2.86573	4.731	-4.0212	0.00126032	0.00957291	-1.46383
11118_at	YBR172C	SMY2	-2.86544	8.39062	-2.8125	0.013826	0.0559853	-3.83859
4124_at	YBL009W	NA	-2.86405	7.16393	-3.80965	0.00191112	0.0128811	-1.8825
3355_s_at	YKL112W	ABF1	-2.86138	5.09614	-5.93062	3.65464e-05	0.000804624	2.14365
11171_at	YOL084W	PHM7	2.85988	10.0276	8.54249	6.28699e-07	3.7145e-05	6.3095
10583_at	YIL166C	NA	2.85942	8.3255	5.3443	0.000103197	0.00169602	1.08032
10571_at	YKL197C	PEX1	-2.85668	4.30285	-7.29753	3.90381e-06	0.000149353	4.43896
4042_at	YML117W	NAB6	-2.85454	5.72055	-8.02654	1.30964e-06	6.64428e-05	5.55863
5217_at	YMR205C	PFK2	2.8528	6.95943	7.48006	2.95111e-06	0.000119777	4.72595
2785_s_at	YMR037C	MSN2	-2.85184	6.20629	-4.7888	0.000287858	0.00331338	0.0330262
2283_s_at	NA	NA	-2.84969	3.52734	-4.94161	0.000216232	0.00272038	0.324663
5328_at	NA	NA	-2.84899	8.44302	-2.76062	0.0153119	0.0607206	-3.93736
2824_at	NA	NA	-2.84793	6.22335	-6.38358	1.6931e-05	0.000437815	2.93308
7651_at	YNL163C	RIA1	-2.84597	4.22306	-10.8926	3.17871e-08	3.57509e-06	9.34202
2781_at	YDR122W	KIN1	-2.84588	5.76781	-3.99298	0.00133205	0.00992092	-1.5196
6092_at	YOR232W	MGE1	-2.84503	6.24045	-4.38587	0.00062021	0.00569212	-0.747055
10572_at	YJL192C	SOP4	-2.84022	6.9263	-2.29663	0.0375745	0.119958	-4.79195
6205_at	YIL147C	SLN1	-2.83836	6.73242	-4.81642	0.000273292	0.00319296	0.0859244
10379_at	YCR017C	CWH43	-2.83382	5.29976	-5.2565	0.000121037	0.00188628	0.917244
8566_at	YGL251C	HFM1	-2.83153	8.03049	-4.01181	0.00128375	0.00969563	-1.48239
4245_at	YDR355C	NA	-2.82705	3.49431	-7.80871	1.80244e-06	8.62862e-05	5.23142
10792_at	YDR006C	SOK1	-2.82343	7.1759	-3.09889	0.00784256	0.0371437	-3.28541
8606_at	YGL207W	SPT16	-2.82227	9.11566	-6.5386	1.30962e-05	0.000362769	3.19668
5713_at	YOR165W	SEY1	-2.82088	4.18744	-4.34347	0.000673079	0.00602993	-0.829957
3772_f_at	YDR285W	ZIP1	-2.8182	5.96075	-5.38928	9.51389e-05	0.00160388	1.1635
10602_at	YGR280C	PXR1	-2.81576	6.71751	-2.99224	0.00969157	0.0433497	-3.4928
10895_at	YBL005W	PDR3	-2.81208	6.21334	-5.39154	9.47522e-05	0.00160388	1.16766
2647_at	YLL034C	RIX7	-2.80916	4.88677	-5.39088	9.48647e-05	0.00160388	1.16645
11329_at	YMR231W	PEP5	-2.80822	6.23155	-5.14863	0.000147441	0.00214721	0.715567
2993_s_at	YJR033C	RAV1	-2.80612	2.9382	-15.4257	3.46794e-10	1.07771e-07	13.8144
8536_at	YDR252W	BTT1	-2.80568	6.33784	-3.88163	0.00165814	0.0115494	-1.73991
8323_at	YJR078W	BNA2	-2.80398	4.55974	-4.32117	0.000702717	0.00621077	-0.873607
6284_at	YIL107C	PFK26	2.80306	7.74098	6.28036	2.01254e-05	0.00049594	2.7557
9479_at	YNL183C	NPR1	-2.80129	6.12042	-5.5354	7.31957e-05	0.00132676	1.43188
10201_at	YLL067C	YRF1-5orYRF1-4orYRF1-7orYRF1-6orYRF1-3orYRF1-2orYRF1-1	-2.80002	4.93796	-3.08202	0.00810977	0.0380426	-3.31829
2196_s_at	YLR319C	BUD6	-2.79919	4.13278	-11.062	2.61534e-08	3.0904e-06	9.53861
7456_at	YLR263W	RED1	-2.79905	5.35049	-5.85235	4.18633e-05	0.000886154	2.00438
8573_at	NA	NA	-2.78458	4.77391	-7.89579	1.58528e-06	7.8716e-05	5.36297
2885_s_at	NA	NA	-2.77775	5.21404	-5.58903	6.65281e-05	0.00124221	1.5297
10310_at	YOR270C	VPH1	-2.77749	5.61076	-3.06864	0.00832828	0.0388861	-3.34437
2765_s_at	YLR187W	SKG3	-2.7768	6.81939	-7.16107	4.82557e-06	0.000178757	4.22145
9693_at	YLR067C	PET309	-2.77455	5.82665	-3.8532	0.00175373	0.0121036	-1.79622
2548_at	YJL155C	FBP26	-2.77027	6.93798	-3.59416	0.00292841	0.0180623	-2.30962
6698_at	YHR119W	SET1	2.76538	8.44458	3.48562	0.00363325	0.0211661	-2.52456
7740_at	NA	NA	-2.76423	4.75325	-5.25694	0.000120942	0.00188628	0.918049
4737_at	YNL039W	BDP1	-2.75812	8.41211	-4.62661	0.000391206	0.0040758	-0.279173
9120_at	YLR366W	NA	2.74914	10.5551	12.2791	6.88837e-09	9.74287e-07	10.8759
10969_at	NA	NA	-2.74773	3.73084	-4.50828	0.000490264	0.00478726	-0.508517
2508_s_at	YOR018W	ROD1	-2.74729	4.95363	-3.06705	0.00835455	0.0389399	-3.34746
5089_at	YDL167C	NRP1	2.74361	11.0764	9.48625	1.77445e-07	1.46588e-05	7.59975
2339_at	NA	NA	-2.74051	3.29407	-7.82306	1.76461e-06	8.49105e-05	5.25316
10497_at	YPL242C	IQG1	-2.73808	5.29361	-8.62209	5.62944e-07	3.48019e-05	6.4224
9360_at	YOR098C	NUP1	-2.7368	5.56056	-6.40893	1.6231e-05	0.000429225	2.97641
2766_s_at	YGR170W	PSD2	-2.73398	6.33589	-5.74799	5.02423e-05	0.00100646	1.81736
2926_s_at	YDR039C	ENA1orENA2orENA5	-2.73234	5.4282	-3.46606	0.00377741	0.0217667	-2.56327
11157_at	YPR111W	DBF20	2.73006	9.34282	12.9838	3.34387e-09	5.3819e-07	11.5945
3013_at	YLL051C	FRE6	-2.7289	5.30169	-3.98266	0.0013593	0.0100308	-1.54
7296_at	YGL131C	SNT2	-2.72756	8.40758	-4.67004	0.000360246	0.00385654	-0.195319
3035_at	YDL154W	MSH5	-2.72585	5.1581	-5.76649	4.86375e-05	0.000981495	1.85063
4199_at	YJL030W	MAD2	-2.72095	6.74865	-3.6753	0.00249304	0.0159183	-2.1488
5529_at	YNL161W	CBK1	2.71938	5.93328	7.50934	2.82275e-06	0.000117635	4.77156
4191_at	YML075C	HMG1	-2.71893	5.72723	-3.31586	0.00509337	0.0272318	-2.85985
5721_at	YBR229C	ROT2	2.71498	11.5066	7.25279	4.18368e-06	0.000158759	4.36792
3034_at	YAR019C	CDC15	-2.71468	6.26752	-4.07275	0.00113931	0.00884812	-1.36206
3704_f_at	YGL071W	RCS1	-2.71269	6.07863	-5.33094	0.000105725	0.00173007	1.05556
7336_at	YOL025W	LAG2	-2.70965	8.02569	-2.54874	0.0231615	0.0835767	-4.33474
10283_at	YOR178C	GAC1	-2.70577	7.51733	-4.62244	0.000394324	0.00409001	-0.287243
6729_at	NA	NA	-2.69302	6.54433	-4.39823	0.000605615	0.00559213	-0.722912
5148_at	YMR287C	MSU1	-2.69188	7.69577	-3.19942	0.00642163	0.0321416	-3.08875
5229_at	YPL150W	NA	-2.6894	5.95794	-4.45896	0.000538873	0.00514393	-0.604475
3718_s_at	YOL098C	NA	-2.68787	3.75362	-6.42648	1.57643e-05	0.000419259	3.00636
5219_at	YIL044C	AGE2	-2.68564	3.37083	-5.87077	4.05432e-05	0.000874067	2.03723
5780_at	NA	NA	-2.67519	6.4262	-3.18736	0.00657753	0.0327299	-3.11239
2411_s_at	NA	NA	2.67226	7.75354	4.32282	0.000700479	0.00619808	-0.870377
4501_at	YLR111W	NA	-2.67013	3.89163	-4.50697	0.000491495	0.00479426	-0.511063
2725_s_at	NA	NA	-2.66795	3.95668	-3.93946	0.00147972	0.0106748	-1.62544
10280_at	YLL026W	HSP104	-2.66616	3.99732	-5.13083	0.000152343	0.00219802	0.682158
8274_at	YNL115C	NA	-2.6653	9.44743	-6.26546	2.06363e-05	0.000506946	2.72997
3113_s_at	YLR255C	NA	-2.66337	6.36285	-6.13365	2.5795e-05	0.000605016	2.50102
5294_at	YGR146C	NA	-2.66022	5.14595	-4.23043	0.000837817	0.00700181	-1.05158
4937_at	YPL105C	NA	-2.65716	6.22714	-5.97259	3.39907e-05	0.000755484	2.218
4150_at	YDR284C	DPP1	-2.65513	8.15869	-2.45994	0.027499	0.0947388	-4.49795
5324_at	YGL245W	GUS1	2.65265	6.51447	5.38096	9.65787e-05	0.0016186	1.14813
2759_at	YGR124W	ASN2	-2.65172	3.86299	-6.89932	7.2967e-06	0.000231692	3.79708
9005_at	YKL213C	DOA1	-2.64733	6.4816	-2.65725	0.0187502	0.0708064	-4.13251
4243_at	YJR092W	BUD4	2.64465	4.60024	5.66839	5.78014e-05	0.00111418	1.67374
11101_at	YMR089C	YTA12	-2.64136	3.99688	-5.86468	4.09748e-05	0.000877155	2.02637
6265_at	YFR023W	PES4	-2.63963	5.10944	-5.37097	9.83366e-05	0.00163924	1.12967
8900_at	YKL033W	NA	-2.63219	8.3728	-3.46979	0.00374945	0.0216433	-2.55588
6100_at	YGR150C	NA	-2.6274	7.00588	-4.75898	0.000304489	0.00345372	-0.0241773
9630_at	NA	NA	-2.62728	9.37814	-5.50607	7.71326e-05	0.00137921	1.37824
10008_at	YEL025C	NA	-2.6269	6.01803	-6.83891	8.03772e-06	0.000248546	3.6978
8982_i_at	NA	NA	-2.62623	5.65002	-3.36915	0.00458073	0.0252129	-2.75475
10776_at	YNL031C	HHT2orHHT1	-2.62313	5.93455	-4.00182	0.00130916	0.00985566	-1.50214
2550_at	YLR306W	UBC12	-2.6211	4.95702	-4.82993	0.000266446	0.00316392	0.111771
5385_at	YPR125W	NA	-2.62047	6.75454	-2.91881	0.0112084	0.0480398	-3.63468
5545_at	YIL158W	NA	-2.61844	3.34009	-12.8797	3.71265e-09	5.77372e-07	11.4908
8344_at	YGR071C	NA	-2.61326	4.91202	-6.6668	1.06166e-05	0.000310678	3.41215
7457_at	YOR058C	ASE1	-2.61254	5.99413	-4.27258	0.000772031	0.00660578	-0.968847
7899_at	YDR084C	NA	-2.60689	5.83319	-3.29972	0.00525965	0.0278848	-2.89163
6357_at	YOR276W	CAF20	-2.60519	5.89462	-2.93702	0.0108118	0.0467044	-3.59957
2159_at	YML010W	SPT5	-2.60028	4.39701	-8.64944	5.42068e-07	3.39611e-05	6.46101
6636_at	YLL067C	YRF1-5orYRF1-4orYRF1-7orYRF1-6orYRF1-3orYRF1-2orYRF1-1	2.59602	4.74477	6.31946	1.88467e-05	0.000472941	2.82307
11431_at	YBR157C	ICS2	-2.59585	3.97438	-4.36778	0.000642225	0.00582621	-0.78241
8299_at	YAL041W	CDC24	-2.59511	8.7056	-4.01481	0.00127623	0.00965445	-1.47647
10802_at	NA	NA	-2.59013	6.0464	-5.67472	5.7159e-05	0.00110931	1.68519
6273_at	YMR275C	BUL1	-2.59004	3.31023	-10.2719	6.63762e-08	6.58351e-06	8.59797
2786_s_at	YJR050W	ISY1	-2.58837	8.38774	-4.96296	0.000207808	0.00265535	0.365196
7920_at	NA	NA	-2.5792	5.09625	-7.37239	3.47884e-06	0.000135312	4.5572
6714_at	YNL041C	COG6	-2.56927	8.77687	-4.15378	0.000972578	0.00782	-1.20234
11173_at	YJR048W	CYC1	-2.56887	6.13818	-6.89631	7.33185e-06	0.000232009	3.79214
10979_at	YNL121C	TOM70	2.56689	7.61752	5.63142	6.1708e-05	0.00117082	1.60674
11235_at	NA	NA	2.5657	7.83999	9.39502	1.99697e-07	1.58298e-05	7.47951
6179_at	YGR230W	BNS1	2.56205	8.19697	6.76769	9.01429e-06	0.000271447	3.58009
4513_at	YAL013W	DEP1	-2.55792	5.37148	-5.71093	5.36239e-05	0.00106137	1.75061
6542_at	YOR014W	RTS1	-2.55173	4.95281	-6.78489	8.76753e-06	0.000268344	3.60858
11207_at	NA	NA	-2.54582	4.59303	-6.51058	1.37152e-05	0.000375459	3.14928
6363_at	YIL025C	NA	-2.54371	5.58847	-2.65484	0.0188388	0.0710835	-4.13704
5617_at	NA	NA	-2.54272	6.0438	-4.31696	0.00070846	0.00623324	-0.88185
4204_at	YHR031C	RRM3	-2.54237	7.2994	-2.47665	0.0266272	0.0926444	-4.4674
4080_at	NA	NA	-2.53795	6.71437	-4.02225	0.00125775	0.00956894	-1.46177
3714_f_at	YHR027C	RPN1	-2.53686	3.97299	-3.54986	0.00319772	0.0193459	-2.39738
10110_at	YLR373C	VID22	2.53639	6.70216	4.45861	0.000539244	0.00514393	-0.605173
6506_at	YJL204C	RCY1	2.53453	6.83446	5.11646	0.000156424	0.0022362	0.655151
11155_at	YLR368W	MDM30	2.53444	10.8821	8.34328	8.31545e-07	4.64819e-05	6.02355
3252_s_at	YDR069C	DOA4	-2.53234	4.48919	-2.99034	0.00972812	0.0434518	-3.49647
10355_at	YGL007W	NA	-2.53216	6.67321	-4.68128	0.000352655	0.00381464	-0.173652
5115_at	YGR022C	NA	2.53143	7.19289	6.39048	1.67374e-05	0.000435219	2.94488
11154_at	YHL007C	STE20	2.52528	4.27819	7.63836	2.32332e-06	0.000102668	4.97121
8947_at	YIL068C	SEC6	-2.52501	6.05248	-4.57599	0.000430785	0.00438058	-0.377137
10157_at	YGR014W	MSB2	-2.52071	9.57613	-9.62029	1.49398e-07	1.27948e-05	7.77474
11039_at	YMR266W	NA	2.51965	6.7348	4.85716	0.000253184	0.00303249	0.163802
11203_i_at	YIL115C	NUP159	2.518	7.18919	5.37738	9.72052e-05	0.00162618	1.14151
9523_at	NA	NA	-2.51603	5.7689	-7.24203	4.25409e-06	0.000160129	4.3508
8189_at	YIL038C	NOT3	-2.51473	8.17138	-4.04956	0.00119222	0.00917509	-1.40784
2321_at	YPL207W	NA	-2.50866	9.75025	-4.58193	0.000425931	0.00435018	-0.365622
10504_at	YHR127W	NA	-2.50542	5.24423	-3.83826	0.00180619	0.0123943	-1.82582
4118_at	YIL047C	SYG1	-2.50466	7.61074	-4.32591	0.000696307	0.00617418	-0.864326
6505_at	YIL156W	UBP7	2.49708	8.27342	6.08134	2.82024e-05	0.000646853	2.40948
2646_at	YML115C	VAN1	-2.49585	4.04722	-4.05488	0.00117986	0.00909494	-1.39733
8653_at	YGR247W	CPD1	-2.49426	3.84293	-7.87048	1.64539e-06	8.01941e-05	5.32484
9580_at	YLR071C	RGR1	-2.49193	7.39717	-5.88506	3.95488e-05	0.000860579	2.06269
7780_at	YJR021C	REC107	2.48317	8.19181	6.181	2.38017e-05	0.000569494	2.58354
5116_at	YDL083C	RPS16AorRPS16B	2.48001	7.4979	7.41376	3.26518e-06	0.000128791	4.62222
6004_at	YJL090C	DPB11	-2.4794	5.21906	-5.28316	0.000115304	0.00183507	0.966858
9326_at	YNL199C	GCR2	-2.47908	5.25226	-5.4495	8.53644e-05	0.00147844	1.27444
11398_s_at	YOR188W	MSB1	-2.4766	7.65388	-5.93926	3.60042e-05	0.000796444	2.15898
10885_at	YOR355W	GDS1	-2.46792	3.86163	-5.04723	0.000177736	0.00240111	0.52472
8910_at	YLR092W	SUL2	2.4609	6.2849	5.24173	0.000124341	0.00190635	0.889716
2612_g_at	NA	NA	-2.46073	4.45351	-4.18385	0.000917251	0.00747167	-1.14316
11124_at	YJL061W	NUP82	2.46058	10.0998	11.7301	1.23966e-08	1.60725e-06	10.2886
11168_at	YPR042C	PUF2	-2.45426	4.22418	-9.39247	2.00361e-07	1.58298e-05	7.47613
6250_at	YOL032W	NA	-2.45398	9.20465	-3.80006	0.00194767	0.0130896	-1.90151
9369_at	YOR330C	MIP1	-2.45229	8.92756	-3.05418	0.00857085	0.0396084	-3.37252
10365_at	NA	NA	-2.45063	3.68847	-2.19643	0.0453867	0.137337	-4.96786
5194_at	NA	NA	-2.45021	5.79836	-6.44145	1.53772e-05	0.000411308	3.03187
2912_at	NA	NA	-2.44796	4.38819	-6.37015	1.73147e-05	0.000445268	2.91008
11222_at	NA	NA	-2.44578	6.78627	-3.526	0.00335304	0.0200239	-2.44465
11189_at	YFR031C-A	RPL2BorRPL2A	-2.43739	7.27347	-6.32869	1.85575e-05	0.000469468	2.83894
10630_at	YFL034W	NA	2.43481	7.97608	7.13597	5.01877e-06	0.00018172	4.18117
7202_at	YGL017W	ATE1	-2.43423	4.45827	-7.38015	3.43763e-06	0.000134833	4.56942
10352_at	YLL031C	GPI13	-2.43419	5.83847	-5.56261	6.97288e-05	0.00128134	1.48157
10756_at	YMR006C	PLB2	2.43293	6.41541	5.51446	7.59844e-05	0.00136407	1.3936
3279_f_at	YJR047C	ANB1	-2.43257	4.22389	-3.40763	0.004243	0.023947	-2.67877
11408_f_at	NA	NA	-2.43234	8.23321	-4.19841	0.000891628	0.00732044	-1.11452
2927_s_at	YJR149W	NA	-2.42388	5.3301	-3.76612	0.00208279	0.0137697	-1.96876
6603_at	YML117W	NAB6	2.4235	9.28935	9.31926	2.20428e-07	1.67111e-05	7.37894
3719_s_at	YER013W	PRP22	-2.42089	3.87489	-4.98929	0.000197882	0.00256917	0.415131
3309_s_at	YGL193C	NA	-2.41741	5.47234	-5.54599	7.1825e-05	0.00130941	1.45124
5108_at	NA	NA	2.41701	6.27298	5.8601	4.1303e-05	0.000880281	2.0182
2320_at	YOL110W	SHR5	-2.41362	7.54063	-5.11799	0.000155985	0.0022362	0.658023
2542_at	YBL039C	URA7	-2.41074	3.05362	-1.83919	0.0871689	0.22572	-5.56108
11206_f_at	YPL151C	PRP46	2.41063	8.08996	7.62674	2.36423e-06	0.000102945	4.95332
3002_g_at	YLR127C	APC2	-2.40931	3.93675	-8.19341	1.02939e-06	5.58682e-05	5.80515
10989_at	NA	NA	2.40908	7.17809	6.54981	1.28569e-05	0.000358265	3.21562
9648_at	YER020W	GPA2	-2.40632	9.89088	-6.11675	2.65484e-05	0.000614961	2.47149
7766_at	YBL023C	MCM2	-2.4028	8.25935	-4.43434	0.000564976	0.00531659	-0.652468
10513_at	YOL046C	NA	2.3992	5.19202	5.6269	6.22038e-05	0.00117783	1.59854
8659_at	YER088C	DOT6	-2.39841	9.77224	-2.85125	0.0128088	0.0528372	-3.76448
6227_at	YJL141C	YAK1	2.39369	7.88039	5.06276	0.000172706	0.00235882	0.554029
4107_at	NA	NA	-2.39233	6.39942	-3.50797	0.00347534	0.020573	-2.48033
2358_at	YPR017C	DSS4	-2.39207	6.16016	-4.35294	0.000660877	0.00594344	-0.811421
10104_at	YBL098W	BNA4	2.39175	6.74781	2.43396	0.0289084	0.0982674	-4.54528
4321_at	YDR339C	NA	2.39166	10.5024	9.49248	1.76024e-07	1.46588e-05	7.60793
3740_f_at	YJR054W	NA	-2.38875	5.82824	-3.5663	0.00309497	0.0188834	-2.36482
2158_at	YHL041W	NA	-2.38618	3.48058	-9.3139	2.21979e-07	1.67111e-05	7.3718
3637_f_at	YLR083C	EMP70	-2.37946	5.40026	-4.16952	0.0009432	0.00762978	-1.17135
6668_at	NA	NA	-2.37613	5.38622	-3.62688	0.00274429	0.0171587	-2.24478
10344_at	NA	NA	-2.37358	8.14644	-2.8538	0.0127447	0.0526422	-3.7596
10256_at	YHR092C	HXT4	-2.37207	4.65155	-4.65445	0.000371057	0.00391065	-0.225395
10919_at	NA	NA	-2.3719	6.06186	-4.76672	0.00030008	0.00342032	-0.00932151
8162_at	YHR134W	WSS1	-2.37126	6.42609	-2.1985	0.0452109	0.136938	-4.96426
7714_at	YML008C	ERG6	-2.36944	4.07453	-5.27051	0.000117989	0.00186051	0.943326
3308_s_at	NA	NA	-2.36746	7.05507	-2.64701	0.0191292	0.0718884	-4.15172
10977_at	YNL126W	SPC98	2.36545	5.6074	2.69881	0.017286	0.0667347	-4.05432
10521_at	YPL269W	KAR9	2.36304	5.92992	4.60408	0.000408337	0.00421662	-0.322745
7541_at	YLR338W	NA	-2.36193	3.18312	-4.6543	0.000371166	0.00391065	-0.225696
8394_at	NA	NA	-2.36143	5.49584	-5.35243	0.00010169	0.00168311	1.09537
5569_at	YKL038W	RGT1	-2.36089	5.41479	-4.23844	0.000824885	0.0069256	-1.03585
4850_at	YMR124W	NA	-2.36032	5.52722	-2.5489	0.023154	0.0835767	-4.33443
3620_f_at	YGR198W	NA	-2.35771	7.27881	-6.70807	9.92782e-06	0.00029421	3.48101
2886_s_at	YLR188W	MDL1	-2.35583	6.23343	-5.0625	0.000172791	0.00235882	0.553531
10988_at	YDL077C	VAM6	2.35514	5.83056	8.41354	7.53057e-07	4.33937e-05	6.12496
9472_at	YLR001C	NA	-2.3551	9.5402	-3.30556	0.00519888	0.0276691	-2.88014
4377_at	YJR061W	NA	-2.35213	4.47898	-5.48338	8.03296e-05	0.00141807	1.33666
11208_at	NA	NA	-2.35058	9.35801	-5.82631	4.38074e-05	0.00091897	1.95784
5334_at	YGL127C	SOH1	2.34773	7.65793	6.17972	2.38535e-05	0.000569494	2.58131
3517_f_at	YNL325C	FIG4	-2.34625	4.22361	-4.23787	0.000825804	0.0069256	-1.03697
4038_at	NA	NA	-2.3456	6.57796	-2.87339	0.0122611	0.0513037	-3.72203
10249_at	YDL125C	HNT1	2.34557	10.4588	9.78526	1.21186e-07	1.08776e-05	7.98742
8027_at	YBL051C	PIN4	-2.34484	8.44811	-3.1685	0.00682899	0.0336582	-3.14934
5584_at	YKL043W	PHD1	-2.34447	6.47473	-4.02798	0.0012437	0.00948522	-1.45045
6551_at	YPR019W	CDC54	-2.34377	4.64304	-8.3494	8.24378e-07	4.64819e-05	6.03241
11158_i_at	YDR182W	CDC1	2.33886	9.38158	5.09574	0.000162509	0.00228761	0.616175
3236_f_at	YAL016W	TPD3	-2.33552	3.72962	-3.29519	0.00530725	0.028038	-2.90054
8444_at	YDR262W	NA	-2.33461	5.50383	-6.10579	2.70491e-05	0.000623464	2.45232
9921_at	YER180C	ISC10	-2.33423	6.50886	-2.45773	0.0276162	0.0949264	-4.50198
10163_at	YJR012C	NA	-2.32704	6.07991	-4.08038	0.00112243	0.00875345	-1.347
11259_at	YKL220C	FRE2	2.31546	6.89522	5.6871	5.59238e-05	0.00109444	1.70757
6365_at	YKR079C	TRZ1	2.3128	4.02739	6.5147	1.36222e-05	0.00037401	3.15626
9519_at	YKL066W	NA	-2.31275	9.08574	-6.19918	2.30797e-05	0.000553854	2.61514
6426_at	YDR379W	RGA2	-2.31039	7.35844	-5.30112	0.000111601	0.00179582	1.00024
7193_at	YDR011W	SNQ2	2.30528	6.41587	6.11691	2.65411e-05	0.000614961	2.47177
8494_at	YGR236C	SPG1	-2.30509	6.30024	-5.01507	0.00018864	0.00249781	0.463946
2913_at	YMR233W	NA	-2.30112	5.65211	-5.89085	3.91539e-05	0.000853975	2.07298
6393_at	YML041C	VPS71	-2.30081	5.93433	-3.39901	0.00431643	0.0242005	-2.6958
5397_at	YDL049C	KNH1	-2.30046	4.24457	-6.77675	8.88345e-06	0.000269243	3.5951
4767_at	NA	NA	2.2981	6.80183	6.47803	1.44728e-05	0.000391605	3.09409
9027_at	NA	NA	2.29739	5.7421	3.32189	0.00503252	0.0269373	-2.84795
9752_at	YLR274W	CDC46	-2.29478	5.32299	-3.8029	0.00193676	0.0130351	-1.89587
7455_at	YLR174W	IDP2	2.29333	10.0612	9.55684	1.62037e-07	1.3751e-05	7.69215
7405_at	YDR038C	ENA1orENA2orENA5	-2.28808	5.35073	-6.28731	1.98919e-05	0.000492548	2.76768
8521_at	YFR031C	SMC2	-2.28775	6.13485	-2.88346	0.0120198	0.0505198	-3.7027
10564_at	YEL022W	GEA2	-2.28747	7.13538	-4.87429	0.000245194	0.00296417	0.196488
10983_at	YLR397C	AFG2	-2.28641	5.81516	-4.88014	0.000242524	0.00295041	0.207647
10343_at	YJL187C	SWE1	-2.28637	5.54141	-3.40412	0.00427279	0.0240425	-2.68571
3700_f_at	NA	NA	-2.28395	3.65871	-3.88849	0.00163589	0.011439	-1.72633
2992_g_at	YPR091C	NA	-2.28339	3.03699	-10.9726	2.89825e-08	3.32749e-06	9.43513
7726_at	NA	NA	-2.2806	6.24627	-2.40554	0.0305287	0.102365	-4.59681
9731_at	YER053C	PIC2	-2.27984	4.24058	-4.99552	0.000195608	0.00254318	0.426927
5599_at	YMR053C	STB2	-2.27921	8.66935	-2.36724	0.0328501	0.108073	-4.66588
6595_at	YFR035C	NA	2.27773	9.79631	11.7528	1.20928e-08	1.58995e-06	10.3134
3222_f_at	YLR069C	MEF1	-2.27752	6.61316	-5.33744	0.000104486	0.0017142	1.06762
11399_s_at	YNL274C	NA	-2.2771	7.80176	-5.17694	0.00013998	0.00207745	0.768626
7186_at	YJL084C	NA	2.27635	7.07634	6.14417	2.53374e-05	0.000598797	2.51938
7819_at	YOL063C	NA	-2.27588	4.81593	-5.66755	5.78871e-05	0.00111418	1.67222
7384_at	NA	NA	-2.27421	6.2993	-4.06134	0.00116504	0.00901367	-1.38458
2773_at	YBR011C	IPP1	-2.26998	3.6653	-7.76087	1.93492e-06	9.16142e-05	5.15873
9531_at	NA	NA	-2.26948	6.606	-4.21414	0.000864764	0.00716367	-1.0836
10743_at	YLR265C	NEJ1	-2.26809	7.07202	-3.19199	0.00651721	0.0324997	-3.10331
7875_at	YLR386W	VAC14	-2.26787	6.55575	-4.92718	0.000222127	0.00277133	0.297226
10991_at	YPR176C	BET2	2.26762	5.89778	4.91892	0.000225575	0.00279782	0.28152
3394_f_at	YGR045C	NA	-2.2646	4.04179	-3.24197	0.00590028	0.0302466	-3.00522
9982_at	YPL169C	MEX67	-2.26142	9.24097	-3.61843	0.00279069	0.0173558	-2.26153
2780_at	YJR059W	PTK2	-2.26035	6.71809	-3.91592	0.00154987	0.0110139	-1.67203
5747_at	YGR003W	CUL3	-2.2583	9.74047	-2.69918	0.0172733	0.0667135	-4.05362
10943_at	NA	NA	-2.25611	7.51758	-2.6121	0.0204771	0.0757291	-4.21701
10708_at	YIL042C	NA	-2.25421	7.15679	-2.19305	0.0456747	0.137807	-4.97372
10230_at	YKR089C	NA	2.25243	7.20929	4.72083	0.00032723	0.00363507	-0.0975032
5218_at	YGL262W	NA	-2.25126	6.24394	-4.87047	0.000246951	0.00297841	0.189207
5079_at	YDL083C	RPS16AorRPS16B	-2.24853	7.01468	-5.15756	0.000145042	0.00212554	0.732326
10795_at	YMR145C	NDE1	-2.24816	6.23312	-4.98707	0.000198701	0.00257264	0.410919
5101_at	YDR038C	ENA1orENA2orENA5	2.24633	6.16116	4.79182	0.00028623	0.00330823	0.0388027
4215_g_at	YDR274C	NA	2.24451	8.16003	3.90152	0.00159442	0.0112671	-1.70052
8915_at	NA	NA	2.24202	7.00195	2.85723	0.0126586	0.052409	-3.75302
6559_f_at	YJR110W	YMR1	2.24088	8.49848	6.74521	9.3479e-06	0.000278794	3.54279
10632_at	NA	NA	-2.23999	6.05165	-4.43291	0.000566523	0.00532577	-0.655241
2782_at	YMR309C	NIP1	-2.23239	5.15216	-4.33129	0.000689102	0.00612645	-0.853791
3443_f_at	YLR021W	NA	-2.23038	7.59954	-4.86013	0.00025178	0.00302184	0.169468
10748_at	YGL009C	LEU1	-2.22965	6.57286	-4.39786	0.00060605	0.00559213	-0.72364
6204_at	YER044C	ERG28	2.22958	6.38349	4.43465	0.00056464	0.00531659	-0.651864
9661_at	YDL239C	ADY3	2.22782	7.69182	3.35731	0.00468993	0.0256176	-2.77811
4810_at	YKL217W	JEN1	-2.22721	6.54566	-4.7186	0.000328612	0.00363507	-0.101794
2288_at	YNL097C	PHO23	-2.22432	3.59367	-5.58955	6.64658e-05	0.00124221	1.53066
11234_at	NA	NA	2.22374	6.50671	7.0243	5.98255e-06	0.000206078	4.00089
4433_at	YDR264C	AKR1	2.22243	7.34532	7.1222	5.12823e-06	0.000183418	4.15903
10659_at	YMR129W	POM152	2.2221	9.38654	6.99049	6.31143e-06	0.000215026	3.94597
11354_at	YPL158C	NA	2.22076	7.98221	7.69449	2.13605e-06	9.77454e-05	5.05737
3913_s_at	YAL034C	FUN19	2.21902	10.6678	2.21561	0.0437827	0.133872	-4.93447
10957_at	YHR067W	HTD2	2.21655	7.48334	7.50219	2.85351e-06	0.000118389	4.76044
9628_at	YOL034W	SMC5	-2.21498	9.03744	-3.17545	0.00673526	0.0333371	-3.13573
3420_f_at	YGL035C	MIG1	-2.21294	6.61019	-5.04056	0.000179944	0.00242042	0.512119
4172_at	YOL130W	ALR1	2.21237	7.9655	4.96105	0.000208549	0.00265956	0.361567
6436_at	YKL174C	TPO5	2.21116	4.18027	4.29744	0.000735736	0.00640084	-0.920104
6508_at	YML093W	UTP14	2.20875	11.7719	13.2256	2.62971e-09	4.54599e-07	11.8324
2337_at	YDR183W	PLP1	-2.20848	3.56408	-8.34347	8.31323e-07	4.64819e-05	6.02383
5307_at	YNL313C	NA	2.20486	10.2242	6.92351	7.02044e-06	0.000225654	3.83669
8218_at	YML130C	ERO1	-2.20484	8.24682	-2.43128	0.0290576	0.0985657	-4.55015
6606_at	YKR101W	SIR1	2.2035	9.36125	6.05691	2.94056e-05	0.000667887	2.36662
11150_at	YGL063W	PUS2	2.20139	6.00176	6.98088	6.4084e-06	0.000215809	3.93032
5081_at	YPL081W	RPS9A	-2.19236	8.31467	-3.57543	0.00303936	0.0186293	-2.34673
3836_f_at	NA	NA	-2.19164	3.98856	-2.93609	0.0108316	0.0467542	-3.60136
7264_at	YGR118W	RPS23A	-2.18874	5.16431	-9.75648	1.25668e-07	1.11725e-05	7.95053
4710_at	YPR117W	NA	2.18564	8.34175	3.06684	0.00835807	0.0389399	-3.34788
11255_at	YFL023W	BUD27	2.18154	7.6697	7.48011	2.95091e-06	0.000119777	4.72601
10566_at	YMR032W	HOF1	2.18024	6.7692	6.52847	1.33166e-05	0.000367783	3.17955
8435_at	YGR167W	CLC1	-2.17706	5.25799	-4.668	0.000361646	0.00385876	-0.199264
10621_at	YBR294W	SUL1	2.17673	8.30434	6.28007	2.01351e-05	0.00049594	2.7552
6441_at	YBR023C	CHS3	-2.17476	9.2529	-3.17271	0.00677211	0.0334493	-3.1411
2579_at	YER076C	NA	-2.17471	4.55372	-7.13144	5.0545e-06	0.00018172	4.17389
6693_at	YNL321W	NA	-2.17332	8.88885	-2.66368	0.0185161	0.0701207	-4.12044
10976_at	NA	NA	2.17067	7.43001	4.35902	0.000653175	0.00589941	-0.799543
4234_at	YDL034W	NA	2.17006	7.44689	3.0999	0.00782681	0.037088	-3.28344
3652_f_at	YMR047C	NUP116	-2.16956	3.73605	-3.0006	0.0095321	0.042821	-3.47658
5649_at	YMR102C	NA	2.16934	10.26	4.37356	0.000635103	0.00579539	-0.771106
10722_at	YML010W	SPT5	2.16887	8.03274	5.84785	4.21927e-05	0.000891107	1.99634
6410_at	YGR239C	PEX21	2.16823	4.18468	6.22002	2.22803e-05	0.000540226	2.65131
3387_f_at	YJL062W	LAS21	-2.16628	3.80281	-3.86575	0.00171084	0.0118565	-1.77135
8304_at	YOL076W	MDM20	2.16036	9.94544	5.86346	4.10623e-05	0.000877155	2.02419
6809_at	YNL233W	BNI4	2.15906	10.5577	8.28219	9.06845e-07	5.00911e-05	5.93486
2494_at	YJL177W	RPL17B	-2.15827	4.55659	-4.13679	0.00100534	0.00804186	-1.2358
8116_f_at	YOR048C	RAT1	-2.1573	5.01737	-2.5534	0.0229528	0.0830055	-4.3261
10614_at	YHR172W	SPC97	-2.15719	3.50791	-2.21259	0.0440314	0.134374	-4.93973
9669_at	YCL043C	PDI1	2.15689	7.79517	5.07945	0.000167467	0.002316	0.585485
10877_at	NA	NA	2.15437	10.593	5.09075	0.000164011	0.00229541	0.60678
6076_at	YDL125C	HNT1	-2.1533	4.87793	-4.91866	0.000225684	0.00279782	0.281026
10945_at	YDR403W	DIT1	-2.15007	5.60944	-4.54805	0.000454375	0.00453646	-0.431306
4412_at	YPR049C	ATG11	-2.14666	5.89105	-1.31288	0.210317	0.439121	-6.30831
4127_at	YMR049C	ERB1	2.14599	6.1845	5.07996	0.000167306	0.002316	0.586464
10686_at	YPR008W	HAA1	2.14596	11.0539	7.14933	4.91495e-06	0.000180634	4.20262
4892_at	YJR011C	NA	2.1443	5.5015	4.49572	0.000502206	0.00486822	-0.532951
3895_s_at	YDR164C	SEC1	-2.14354	6.72441	-3.09651	0.00787971	0.037263	-3.29005
7776_at	YLR357W	RSC2	-2.14346	5.31857	-2.78404	0.0146227	0.0584923	-3.89283
2287_at	YLL021W	SPA2	-2.14218	3.56112	-5.34514	0.000103039	0.00169602	1.08188
4428_at	NA	NA	-2.1416	8.76152	-5.87095	4.05304e-05	0.000874067	2.03756
10932_at	YDR126W	SWF1	2.14004	7.77219	5.142	0.000149246	0.00216674	0.703133
8976_at	YGL166W	CUP2	-2.13989	5.21677	-3.03899	0.00883322	0.0404405	-3.40206
3409_f_at	YML035C-A	NA	-2.13806	8.0783	-6.95961	6.62849e-06	0.000219194	3.89566
10672_at	YDR100W	NA	-2.13706	6.26353	-4.72967	0.000321808	0.00360201	-0.0804957
11396_g_at	YGL238W	CSE1	-2.1368	5.75197	-3.86148	0.00172531	0.0119479	-1.77981
2115_at	YJL157C	FAR1	-2.13588	3.05119	-7.7263	2.03706e-06	9.50742e-05	5.10601
7306_at	YBR008C	FLR1	-2.13223	5.69051	-4.92088	0.000224751	0.00279367	0.285252
10998_at	YHR200W	RPN10	2.13184	9.65674	4.25613	0.000797057	0.00677027	-1.00113
7391_at	YOR038C	HIR2	2.13141	9.86245	5.006	0.00019184	0.00251635	0.446776
10021_at	YER151C	UBP3	2.13112	8.71251	5.38801	9.53563e-05	0.00160388	1.16116
5758_at	YGR161C	RTS3	-2.12815	6.088	-3.75293	0.00213782	0.0140638	-1.9949
10070_at	YDR146C	SWI5	2.12555	7.19404	4.54854	0.000453944	0.00453646	-0.430342
2774_at	YNL176C	NA	-2.12436	3.42452	-7.45499	3.06595e-06	0.000123375	4.68679
6468_at	YJL175W	NA	2.12425	6.62873	4.71998	0.000327754	0.00363507	-0.0991321
8437_at	YGL062W	PYC1	2.123	9.28681	5.87313	4.03776e-05	0.000874067	2.04143
5090_at	YJR014W	NA	-2.12229	4.90053	-3.40059	0.00430288	0.0241536	-2.69268
6621_at	YMR054W	STV1	-2.12179	8.12453	-3.28285	0.00543927	0.0286221	-2.92484
6408_at	YPL022W	RAD1	2.11928	6.72627	4.51504	0.000483965	0.0047606	-0.495385
7671_at	NA	NA	-2.11736	3.36651	-5.02099	0.000186584	0.00248114	0.475132
6631_at	YJL177W	RPL17AorRPL17B	2.11401	9.65249	5.93707	3.61409e-05	0.000797578	2.15509
8461_at	YKL081W	TEF4	-2.11325	6.93934	-2.26995	0.0395205	0.124504	-4.83913
5602_at	YHR041C	SRB2	2.11307	4.93364	5.27304	0.000117447	0.00186051	0.948035
10154_at	YPL023C	MET12	2.11288	7.71977	4.1284	0.00102193	0.00813279	-1.25233
3012_s_at	YOL123W	HRP1	-2.1114	3.03698	-9.13135	2.82343e-07	2.07533e-05	7.12671
3666_f_at	YDR106W	ARP10	-2.11103	6.83509	-4.84018	0.000261374	0.00311613	0.131356
9883_at	YNL243W	SLA2	-2.10743	4.13611	-2.09101	0.0552263	0.159067	-5.14877
4486_at	YGL046W	RIM8	2.10739	8.42613	6.83867	8.04081e-06	0.000248546	3.6974
4209_at	NA	NA	-2.10732	5.67307	-9.65469	1.42986e-07	1.24745e-05	7.81933
2506_s_at	YER123W	YCK3	-2.10603	4.0634	-1.78013	0.09674	0.24411	-5.65323
7365_at	YEL032W	MCM3	2.10469	6.55587	4.28674	0.000751133	0.00649845	-0.941071
5757_at	NA	NA	2.10436	6.91825	4.30778	0.000721148	0.0063092	-0.899827
9067_at	YJL149W	NA	-2.10341	3.21228	-7.66037	2.24792e-06	0.000100886	5.00504
7401_at	YIR032C	DAL3	-2.10321	10.1437	-4.30912	0.00071928	0.00629876	-0.8972
8074_s_at	YEL055C	POL5	-2.10151	6.7021	-3.36978	0.004575	0.0252082	-2.75351
11348_at	YIL122W	POG1	-2.10125	6.94169	-2.67734	0.0180279	0.0686339	-4.09476
7147_at	NA	NA	2.10058	9.068	4.60279	0.000409341	0.00422232	-0.325241
3383_f_at	YPL267W	NA	-2.10039	6.24283	-6.72705	9.62687e-06	0.0002862	3.5126
10299_at	YLR014C	PPR1	-2.09885	5.97185	-4.24191	0.000819346	0.0069093	-1.02903
10707_at	YPR174C	NA	2.0966	5.48098	6.46784	1.4719e-05	0.000397115	3.07678
10115_at	YOR129C	NA	-2.09569	5.01039	-2.70759	0.016991	0.0659975	-4.03775
6558_i_at	NA	NA	2.09537	8.13271	4.86246	0.000250686	0.00301566	0.173908
2739_g_at	YDL217C	TIM22	-2.09418	3.4726	-4.54351	0.000458332	0.00456261	-0.440116
5329_s_at	YGL025C	PGD1	2.09402	10.2916	5.1437	0.000148783	0.00216338	0.706311
6217_at	YGL083W	SCY1	2.09368	8.90233	4.29636	0.000737274	0.00640824	-0.922218
6453_at	YAL039C	CYC3	-2.09355	3.60666	-5.16823	0.000142232	0.00210418	0.752317
5137_at	YBR168W	PEX32	2.09193	10.1706	7.86882	1.64941e-06	8.01941e-05	5.32234
4603_at	YKL084W	HOT13	2.09039	7.67668	3.29936	0.00526335	0.0278848	-2.89233
5426_at	YFR002W	NIC96	-2.0899	8.17965	-2.18373	0.0464787	0.139466	-4.98988
7206_at	YKL121W	NA	2.08903	7.43092	3.275	0.00552487	0.0289196	-2.94028
6386_at	YKL122C	SRP21	2.08598	10.1955	7.1056	5.26352e-06	0.000186928	4.13231
6454_g_at	YDL031W	DBP10	-2.08503	5.85791	-6.54476	1.29641e-05	0.000360179	3.20709
11385_s_at	YER144C	UBP5	-2.08423	7.48543	-2.68391	0.0177978	0.0680632	-4.0824
6549_at	NA	NA	2.08263	8.49124	4.79071	0.000286828	0.00330823	0.0366753
3431_f_at	YNL066W	SUN4	-2.08229	7.49071	-4.71578	0.000330367	0.0036416	-0.107217
6849_at	YDL215C	GDH2	-2.08098	7.29496	-4.45127	0.000546894	0.005183	-0.619467
10005_at	YLR382C	NAM2	-2.07743	5.98586	-2.6119	0.0204848	0.0757291	-4.21737
5652_at	YLR291C	GCD7	2.07737	5.87655	5.29633	0.000112577	0.00180258	0.991341
5430_at	YLR460C	NA	-2.07677	5.87371	-4.12948	0.00101978	0.00812254	-1.2502
3774_f_at	YDR399W	HPT1	-2.0719	4.68961	-8.06852	1.23227e-06	6.39071e-05	5.62098
9037_at	YGR203W	NA	-2.07108	6.38748	-4.17735	0.000928933	0.00754707	-1.15595
6139_at	YJL098W	SAP185	2.07053	10.0176	5.8573	4.15041e-05	0.000882553	2.01321
11223_at	YGL206C	CHC1	2.06968	4.96534	9.42239	1.92727e-07	1.55095e-05	7.51568
3787_f_at	NA	NA	-2.06959	5.05499	-3.70306	0.00235965	0.015184	-2.09378
6587_at	YJL137C	GLG2	2.0646	6.95565	4.60124	0.000410549	0.00422544	-0.328238
2203_s_at	NA	NA	-2.06348	7.63185	-2.81857	0.0136615	0.0555202	-3.82699
8622_at	YNL148C	ALF1	-2.06332	5.96499	-2.04764	0.0598203	0.169476	-5.22186
3658_f_at	NA	NA	-2.06191	5.58057	-4.25357	0.000801022	0.00678543	-1.00615
8366_at	NA	NA	-2.0612	4.70114	-1.9754	0.0682574	0.186898	-5.34175
7724_at	YIL143C	SSL2	2.05807	6.32484	5.24793	0.000122943	0.00189767	0.90127
9136_at	NA	NA	-2.05802	5.92496	-3.93466	0.00149376	0.0107428	-1.63493
6643_at	NA	NA	2.0576	6.53452	4.46887	0.000528731	0.00507267	-0.585194
10408_at	YKR008W	RSC4	2.05677	8.41496	5.49568	7.85805e-05	0.00139458	1.3592
4824_at	YJR022W	LSM8	2.05646	9.82361	5.97453	3.38774e-05	0.000755484	2.22142
2493_at	YMR160W	NA	-2.0563	5.2347	-3.99066	0.00133813	0.00993884	-1.52419
9853_at	YPL018W	CTF19	2.05546	8.67068	7.10439	5.27351e-06	0.000186928	4.13036
3393_f_at	NA	NA	-2.0534	8.81827	-4.72192	0.000326555	0.00363507	-0.0954037
4909_f_at	NA	NA	2.05272	7.44419	5.13264	0.000151837	0.00219411	0.685556
4784_at	YLR309C	IMH1	-2.05193	3.14327	-7.25915	4.14261e-06	0.000157842	4.37804
3497_f_at	YLR182W	SWI6	-2.0512	6.9169	-4.96857	0.000205649	0.00263465	0.375851
8026_at	YAL056W	GPB2	-2.0499	3.9135	-7.71966	2.05731e-06	9.50742e-05	5.09587
3720_f_at	YAL020C	ATS1	-2.0468	8.00667	-4.98431	0.000199722	0.00257871	0.405688
6187_at	YDR143C	SAN1	2.04547	8.26137	4.38648	0.000619486	0.00569183	-0.74587
4039_at	YKR103W	NFT1	-2.04366	7.01036	-4.05227	0.0011859	0.00913401	-1.40248
2280_s_at	NA	NA	-2.04119	3.11849	-2.91167	0.0113678	0.0486333	-3.64843
5085_at	YDR057W	YOS9	2.03967	8.61254	5.79165	4.65413e-05	0.000963333	1.89579
8380_at	YBL108W	NA	-2.03844	6.004	-2.46937	0.0270037	0.0936777	-4.48072
5075_i_at	YGL076C	RPL7A	2.0384	9.06401	3.52472	0.00336158	0.0200513	-2.44718
8330_at	YMR120C	ADE17	-2.03816	6.37341	-3.47775	0.00369061	0.0213986	-2.54015
5670_i_at	YHR095W	NA	2.03459	6.49997	3.22493	0.00610382	0.0309333	-3.03869
3587_f_at	YDR196C	NA	-2.03385	4.81256	-7.4397	3.13828e-06	0.000125196	4.66288
2784_s_at	YLR204W	QRI5	-2.03361	6.48124	-5.25492	0.000121386	0.00188857	0.914298
9745_at	YOR343C	NA	-2.03293	6.10364	-5.04947	0.000177001	0.00239465	0.52895
5010_at	NA	NA	2.03168	7.59015	4.69294	0.000344951	0.00375743	-0.151176
9792_s_at	YGL002W	ERP6	-2.02979	5.18189	-2.79831	0.0142177	0.0573065	-3.86565
11000_at	YMR137C	PSO2	2.02825	8.64481	6.00674	3.20499e-05	0.000719197	2.2783
6229_at	YJL167W	ERG20	-2.02786	7.05318	-4.20605	0.000878481	0.00723159	-1.09951
6002_at	YIL009W	FAA3	2.02672	10.3171	4.33963	0.000678087	0.00605736	-0.837468
6290_at	YJL191W	RPS14BorRPS14A	2.02629	7.35684	8.89756	3.86209e-07	2.6628e-05	6.80719
11037_at	NA	NA	2.0244	5.41093	5.0815	0.000166834	0.00231411	0.589352
2925_s_at	NA	NA	-2.0239	4.50593	-2.7112	0.0168713	0.0656224	-4.03094
3579_f_at	NA	NA	-2.02362	7.56428	-4.81816	0.000272401	0.00318818	0.0892483
6605_at	YPL019C	VTC3	2.02345	8.24822	5.16396	0.000143351	0.00211162	0.744307
10051_at	YKR102W	FLO10	2.02268	8.93658	3.74861	0.00215618	0.0141646	-2.00347
7939_at	YOR131C	NA	-2.0215	5.8332	-5.15983	0.00014444	0.00212337	0.736581
6371_at	YNL101W	AVT4	2.01792	7.63122	3.83839	0.00180572	0.0123943	-1.82556
4258_at	YBL016W	FUS3	-2.01739	9.0793	-3.15455	0.00702106	0.034297	-3.17664
9641_at	YJL140W	RPB4	-2.01702	8.48958	-3.39532	0.00434826	0.0243205	-2.70309
9635_at	YJL136C	RPS21B	-2.0157	7.58653	-3.04082	0.00880119	0.040365	-3.3985
3310_s_at	YDL137W	ARF2	-2.01212	11.2535	-2.89187	0.0118216	0.0500389	-3.68653
6937_at	YIR020W-B	NA	2.01191	9.30665	2.52727	0.0241453	0.0863918	-4.37438
2726_s_at	YDR052C	DBF4	-2.01103	4.67749	-3.15672	0.0069909	0.0342393	-3.17241
2710_s_at	YJL177W	RPL17AorRPL17B	-2.01056	7.14815	-4.66709	0.000362267	0.00386046	-0.201009
10105_at	NA	NA	2.00955	7.30072	7.99791	1.36532e-06	6.8523e-05	5.51598
11181_at	YGR067C	NA	-2.0095	7.21445	-5.40007	9.33047e-05	0.00159524	1.18341
3414_f_at	YFL050C	ALR2	-2.00827	6.71074	-5.11675	0.00015634	0.0022362	0.655703
6442_at	YJR137C	ECM17	-2.00714	3.90928	-4.03561	0.00122524	0.00936744	-1.43538
8204_at	YOR076C	SKI7	-2.00647	6.95271	-2.74656	0.0157406	0.0621246	-3.96403
6885_at	YDR525W-A	SNA2	-2.00572	7.3942	-2.9454	0.0106338	0.0461061	-3.58338
5061_at	YHR140W	NA	2.00468	5.26955	6.85748	7.80187e-06	0.00024522	3.72836
7067_at	YDR239C	NA	-2.00348	6.10541	-4.47025	0.000527331	0.00506444	-0.582504
2714_s_at	YOR372C	NDD1	-2.00346	9.8992	-3.49678	0.00355353	0.0209288	-2.50248
6612_at	YOL096C	COQ3	2.00321	5.3308	8.80973	4.35112e-07	2.92214e-05	6.68549
11352_at	YJR023C	NA	2.00254	6.61395	4.01728	0.00127005	0.00962328	-1.47158
5169_at	YHR154W	RTT107	2.00244	7.19109	3.75067	0.00214742	0.014117	-1.99939
4506_at	YLR002C	NOC3	2.00209	7.26202	2.29758	0.0375063	0.119782	-4.79025
8298_at	YLR103C	CDC45	2.00144	4.75547	4.60165	0.000410234	0.00422544	-0.327456
9802_at	YJR079W	BNA2	-2.00009	5.10421	-2.5457	0.0232985	0.0838764	-4.34036
6819_at	YGL256W	ADH4	1.99798	10.0115	8.60932	5.7298e-07	3.49593e-05	6.40435
6062_at	NA	NA	1.99738	8.79078	4.74178	0.000314533	0.00353755	-0.0572184
4103_at	YNL212W	VID27	1.99444	10.237	6.91147	7.1565e-06	0.000228788	3.81699
6588_at	YNL311C	NA	1.99311	5.97345	6.9474	6.75836e-06	0.000222145	3.87574
10179_at	YKL098W	NA	-1.9923	8.49566	-6.52431	1.34082e-05	0.00036922	3.17252
7869_at	NA	NA	1.99163	10.626	6.32381	1.87099e-05	0.000470774	2.83054
4907_at	NA	NA	-1.99134	2.90219	-6.1348	2.57447e-05	0.000605016	2.50302
6638_at	NA	NA	1.99104	9.14323	4.51608	0.000483003	0.0047606	-0.493364
3014_at	YBL086C	NA	-1.99055	4.0221	-3.88958	0.00163236	0.0114229	-1.72416
3556_s_at	YGR106C	NA	-1.98868	6.66636	-2.91027	0.0113994	0.0487462	-3.65113
6285_at	YIL016W	SNL1	1.98803	5.64124	3.98533	0.00135222	0.0100023	-1.53473
7667_at	YNR013C	PHO91	-1.9879	7.19573	-2.95695	0.0103935	0.0454868	-3.56109
11152_g_at	YDR333C	NA	-1.9879	10.202	-5.45583	8.43985e-05	0.00146895	1.28609
7143_at	YER087W	NA	1.98777	6.96188	4.71754	0.000329271	0.00363757	-0.103833
9623_at	YJL143W	TIM17	-1.98757	6.65028	-3.08263	0.00809999	0.0380416	-3.31711
3672_f_at	YER129W	NA	-1.98668	3.76854	-3.09475	0.00790727	0.0373677	-3.29348
3703_f_at	YHR058C	MED6	-1.9864	5.0284	-6.57978	1.22394e-05	0.000345181	3.26614
4806_at	YMR019W	STB4	-1.98637	5.80133	-3.45426	0.0038671	0.0221244	-2.58661
4822_at	YIL167W	SDL1	1.98443	7.05003	4.25052	0.000805781	0.00681955	-1.01214
6337_at	YHR177W	NA	-1.98441	4.61858	-6.65689	1.07895e-05	0.000312973	3.39557
4422_at	YFL004W	VTC2	1.98413	8.00995	7.85989	1.67125e-06	8.08347e-05	5.30886
8475_at	YLR413W	NA	-1.98221	3.97044	-4.97899	0.000201705	0.00260071	0.395609
8450_at	YOR100C	CRC1	-1.98112	4.73458	-3.53949	0.00326431	0.019609	-2.41793
9963_at	YIL067C	NA	-1.98086	7.64323	-2.98795	0.00977422	0.043589	-3.5011
4759_at	YPL268W	PLC1	1.97923	7.28832	3.62837	0.00273621	0.0171311	-2.24183
6673_at	YAL063C	FLO5orFLO9orFLO1	-1.97565	7.05543	-2.26447	0.0399323	0.125121	-4.8488
3424_f_at	YEL043W	NA	-1.97485	3.90731	-2.95805	0.0103708	0.0454725	-3.55895
9351_at	YLR258W	GSY2	-1.97066	9.33697	-2.96473	0.0102344	0.0450815	-3.54603
3248_s_at	YNL216W	RAP1	-1.96839	3.96889	-2.87339	0.0122612	0.0513037	-3.72204
10116_at	YOR255W	OSW1	1.96769	7.18476	3.78416	0.00200981	0.0133629	-1.933
9130_at	YHR028C	DAP2	1.96764	8.28709	5.14911	0.000147311	0.00214721	0.716471
10114_at	YML092C	PRE8	-1.967	8.85347	-2.44861	0.028105	0.096173	-4.5186
7205_at	YLR248W	RCK2	1.96354	7.89938	3.41216	0.00420498	0.0237756	-2.66983
10360_at	YNL238W	KEX2	-1.9628	8.3726	-2.886	0.0119594	0.0503792	-3.6978
9864_at	YHR128W	FUR1	1.96229	11.648	9.93091	1.00966e-07	9.42513e-06	8.17276
5671_s_at	NA	NA	1.96062	7.22361	4.39539	0.000608937	0.00560595	-0.728459
8341_at	YKL195W	MIA40	1.96016	8.53822	4.1664	0.000948946	0.00766962	-1.17749
7065_at	YOR112W	NA	1.95966	8.2	6.75643	9.17984e-06	0.000274709	3.56141
11357_at	YLR280C	NA	-1.9593	5.77545	-6.34626	1.80199e-05	0.000459605	2.86911
5422_s_at	YLR022C	NA	-1.95921	9.96792	-7.13106	5.05757e-06	0.00018172	4.17327
6482_at	YMR194W	RPL36A	-1.95847	6.03707	-4.02163	0.00125928	0.00957278	-1.463
4182_at	YDL152W	NA	1.95715	7.87057	5.65003	5.97082e-05	0.00113983	1.64049
9723_at	YGL080W	NA	-1.95715	5.24138	-3.79891	0.0019521	0.01311	-1.90378
4383_at	YDR251W	PAM1	1.9561	5.98762	4.62903	0.000389413	0.00407074	-0.2745
5129_at	YDL129W	NA	-1.95456	6.62022	-2.3708	0.0326272	0.107624	-4.65947
8379_at	YDR337W	MRPS28	-1.95359	5.73833	-2.9801	0.0099275	0.0440692	-3.5163
10239_at	YLR167W	RPS31	1.95349	7.49739	3.89877	0.0016031	0.0113199	-1.70598
11213_at	YER056C-A	RPL34BorRPL34A	1.95133	7.16347	5.00208	0.000193239	0.0025194	0.43936
11162_at	YLR385C	SWC7	1.94946	5.99034	5.09385	0.000163076	0.00228902	0.612618
6909_at	YHL037C	NA	1.94676	10.5183	8.09072	1.19333e-06	6.2233e-05	5.65387
4390_at	YKL130C	SHE2	1.9441	6.54901	5.08388	0.000166103	0.0023074	0.593835
10479_at	YPL084W	BRO1	-1.94308	5.41851	-3.84089	0.00179683	0.0123516	-1.8206
7191_f_at	YOR363C	PIP2	1.94218	10.002	7.63286	2.3426e-06	0.000102668	4.96274
11169_at	YJL125C	GCD14	1.93836	8.57694	4.97072	0.00020483	0.00263465	0.379924
6298_at	YMR030W	RSF1	1.93821	8.68756	5.78725	4.69009e-05	0.00096649	1.8879
2723_s_at	YFL054C	NA	-1.9371	3.59515	-4.35879	0.000653453	0.00589941	-0.799974
7772_at	YJR119C	NA	1.93352	6.33943	3.99835	0.0013181	0.00989106	-1.509
5020_at	YCR025C	NA	-1.93238	6.05718	-2.92638	0.0110419	0.0475224	-3.6201
10994_at	YDR078C	SHU2	1.93187	5.22914	3.82533	0.00185286	0.0125884	-1.85143
4914_at	YLR137W	NA	1.93055	8.6058	3.82157	0.00186667	0.0126546	-1.85888
11126_at	YHR182W	NA	1.9298	7.82345	5.60037	6.52007e-05	0.00122465	1.55034
4502_at	YGR015C	NA	-1.92858	6.06876	-3.78691	0.00199894	0.0133287	-1.92757
8535_at	NA	NA	-1.92766	6.26941	-2.11169	0.0531523	0.154332	-5.11363
9066_at	NA	NA	1.92698	5.29484	5.00213	0.000193222	0.0025194	0.439449
6389_at	NA	NA	-1.92464	8.94317	-3.35089	0.00475027	0.0258414	-2.79078
6158_at	NA	NA	-1.92359	2.93482	-3.85603	0.00174396	0.0120681	-1.79061
11096_at	YBR278W	DPB3	-1.92209	6.34466	-2.38043	0.0320324	0.1063	-4.64215
6601_at	YBR185C	MBA1	1.91915	7.28409	4.63537	0.000384748	0.004031	-0.262245
4925_at	YDR500C	RPL37B	-1.91734	4.91402	-3.01709	0.00922549	0.0418058	-3.4446
9161_at	YMR080C	NAM7	-1.91733	8.24552	-4.19415	0.00089905	0.00736842	-1.1229
10757_at	YDR133C	NA	1.9166	7.77209	7.06913	5.57411e-06	0.000194885	4.07347
6810_g_at	NA	NA	1.91652	11.0273	8.81243	4.33513e-07	2.92214e-05	6.68925
5195_at	YKL016C	ATP7	1.91453	9.91999	6.33599	1.8332e-05	0.000465689	2.85148
5298_at	NA	NA	1.91236	5.53188	5.1503	0.000146991	0.00214721	0.718694
7827_at	YHR029C	NA	1.91134	12.1066	7.44109	3.13165e-06	0.000125196	4.66504
10211_at	YMR292W	GOT1	1.91073	10.7223	7.41283	3.26979e-06	0.000128791	4.62077
11137_at	YOR144C	ELG1	-1.90993	5.53999	-3.88134	0.0016591	0.0115494	-1.74049
4715_at	YDL053C	PBP4	1.90966	5.95372	2.86043	0.0125789	0.0521539	-3.74688
5384_at	NA	NA	-1.90896	6.19558	-3.98847	0.0013439	0.00996446	-1.52852
7946_at	YPL052W	OAZ1	-1.90838	10.0474	-4.13442	0.00100999	0.00805836	-1.24046
5717_at	YHR161C	YAP1801	-1.90764	9.56334	-4.11738	0.00104415	0.0082673	-1.27404
7414_at	YPR181C	SEC23	1.90682	6.57351	5.08943	0.000164411	0.00229757	0.60429
7190_i_at	NA	NA	1.90554	9.40373	9.04038	3.18722e-07	2.25477e-05	7.00314
9958_at	YJR017C	ESS1	-1.90268	6.63464	-3.88384	0.00165092	0.0115096	-1.73553
2884_g_at	YNL190W	NA	-1.9024	5.08705	-4.81793	0.000272519	0.00318818	0.0888101
7268_at	YFR001W	LOC1	1.90198	3.79471	3.92966	0.00150852	0.0108157	-1.64483
3502_f_at	YKR037C	SPC34	-1.90029	7.95	-5.24967	0.000122555	0.00189726	0.904506
10097_at	YGR096W	TPC1	-1.89854	6.23524	-3.78429	0.00200929	0.0133629	-1.93275
7184_at	YJR129C	NA	1.89838	7.53308	4.43211	0.000567396	0.00532862	-0.656804
11174_at	YGL024W	NA	1.89775	6.95803	4.27705	0.000765372	0.00655716	-0.96008
11095_at	YIL045W	PIG2	-1.89755	7.80507	-2.14787	0.0496972	0.146906	-5.05175
4133_at	YGL096W	TOS8	-1.89702	7.27095	-2.8443	0.0129857	0.053386	-3.77779
4418_at	NA	NA	-1.89558	6.87716	-2.14214	0.0502299	0.147956	-5.06158
3430_f_at	NA	NA	-1.89503	8.15419	-4.56228	0.000442199	0.00446746	-0.403711
9499_at	YDR216W	ADR1	1.89487	7.80363	3.99315	0.00133162	0.00992092	-1.51928
6373_g_at	NA	NA	1.89456	8.05965	4.54904	0.000453512	0.00453646	-0.429376
10886_at	NA	NA	-1.89431	3.3827	-6.39901	1.65011e-05	0.000432691	2.95947
9920_at	YGL082W	NA	1.89414	4.97215	3.95997	0.00142127	0.0103173	-1.58488
11432_at	YKL155C	RSM22	-1.89327	5.10634	-5.83481	4.31622e-05	0.000907476	1.97305
10624_at	NA	NA	-1.89213	7.65288	-2.97163	0.0100955	0.0446853	-3.53269
9091_at	YHL013C	NA	-1.88971	7.2201	-3.16694	0.00685027	0.033736	-3.1524
8964_at	NA	NA	-1.88966	5.93466	-2.37049	0.0326468	0.107629	-4.66004
3526_f_at	YLR222C	UTP13	-1.88928	7.37167	-5.70549	5.414e-05	0.00106849	1.74079
5659_at	YDR015C	NA	1.889	6.32505	6.8727	7.61392e-06	0.000240122	3.75339
11138_at	YGL153W	PEX14	-1.88878	6.15193	-2.09683	0.0546349	0.157607	-5.13889
7091_at	YJL177W	RPL17AorRPL17B	1.88843	7.42541	6.93193	6.92689e-06	0.000223746	3.85046
8195_at	YJL142C	YAK1	-1.88776	8.77904	-4.21002	0.00087172	0.00720626	-1.0917
6947_g_at	YHL033C	RPL8BorRPL8A	-1.88603	10.3096	-3.0047	0.00945501	0.0426389	-3.46864
10692_at	YHR208W	BAT1	-1.88578	7.61786	-8.90961	3.7997e-07	2.64703e-05	6.82381
6586_at	YGR089W	NNF2	1.8845	9.58452	6.92227	7.03431e-06	0.000225654	3.83467
3607_f_at	YGR183C	QCR9	-1.8837	3.59902	-4.22795	0.000841864	0.00701679	-1.05645
2497_s_at	YDR421W	ARO80	-1.88239	3.81236	-6.97906	6.42688e-06	0.000215809	3.92736
10482_at	YBL047C	EDE1	-1.88221	7.85243	-3.65866	0.00257668	0.0163516	-2.1818
2842_at	YGL126W	SCS3	-1.88117	5.90299	-5.52212	7.49506e-05	0.00135594	1.40762
2294_f_at	YLR260W	LCB5	-1.87723	7.48912	-2.8425	0.0130319	0.0535442	-3.78123
9107_at	YER001W	MNN1	-1.87719	3.48361	-4.33818	0.000679983	0.0060627	-0.840296
11006_at	YGL076C	RPL7A	1.87555	8.5369	8.57824	5.98208e-07	3.60275e-05	6.36031
9754_at	NA	NA	-1.87542	4.20277	-1.94385	0.072273	0.19533	-5.39337
10057_at	YDR092W	UBC13	1.87525	6.60354	3.98655	0.00134896	0.0099941	-1.53231
6826_at	YBR142W	MAK5	1.87434	8.35871	8.54382	6.27535e-07	3.7145e-05	6.31139
11204_s_at	YJR094C	IME1	1.87364	8.85891	4.71159	0.000332994	0.00366526	-0.115277
7402_at	NA	NA	1.87278	6.57628	5.73331	5.15542e-05	0.00103053	1.79094
2148_at	YGL045W	RIM8	-1.87103	6.28048	-3.95518	0.00143472	0.0103984	-1.59436
2505_s_at	YDR066C	NA	-1.8708	4.02125	-1.85278	0.0850909	0.22126	-5.53962
2458_g_at	YDR086C	SSS1	1.86708	8.8158	4.82748	0.000267678	0.00316392	0.107073
10032_at	YBL072C	RPS8BorRPS8A	-1.86579	7.02176	-2.1293	0.0514439	0.150826	-5.08358
10972_at	YJR146W	HMS2	1.86488	4.63553	5.87686	4.01165e-05	0.000870902	2.04808
3555_s_at	YKL196C	YKT6	-1.86437	6.69392	-2.45778	0.0276135	0.0949264	-4.50189
8023_at	YMR008C	PLB1	-1.8618	8.93258	-3.20603	0.00633771	0.0318249	-3.07578
10024_at	NA	NA	-1.86034	6.74525	-2.04311	0.0603204	0.170508	-5.22945
10912_at	YAL019W	FUN30	-1.85494	5.84909	-1.80664	0.0923344	0.235439	-5.6121
7197_at	YOR328W	PDR10	1.85438	7.52631	5.77432	4.79748e-05	0.000975697	1.86469
9885_at	YDR109C	NA	1.85413	12.3328	8.7417	4.77486e-07	3.05297e-05	6.5906
10643_at	YDR123C	INO2	1.85405	4.9418	4.22102	0.000853281	0.00709295	-1.07008
4126_at	YJL165C	HAL5	-1.85316	6.25941	-2.26676	0.0397599	0.124822	-4.84477
7851_at	YER005W	YND1	-1.85313	5.76972	-3.92331	0.0015275	0.0108932	-1.65741
11153_at	YOR275C	RIM20	-1.85136	9.70734	-4.4153	0.00058604	0.00547068	-0.689594
9389_at	NA	NA	1.85131	8.52456	4.23811	0.000825414	0.0069256	-1.0365
8634_at	YDR027C	VPS54	-1.85107	10.3803	-2.68026	0.0179252	0.0684104	-4.08926
3657_f_at	YMR013C	SEC59	-1.85033	7.20205	-4.31149	0.000716001	0.00627895	-0.892573
10973_at	YHR051W	COX6	1.85012	6.00621	5.65126	5.95782e-05	0.00113968	1.64272
5076_f_at	YEL067C	NA	1.84951	5.47013	3.9794	0.00136805	0.0100715	-1.54645
11159_s_at	YGR195W	SKI6	1.84726	8.1623	5.26249	0.000119725	0.00187612	0.928387
9517_g_at	YDR353W	TRR1	-1.84701	8.73621	-3.14834	0.00710838	0.0346458	-3.1888
9455_at	YPL075W	GCR1	-1.84618	4.54742	-2.58489	0.0215908	0.0790704	-4.26768
9610_at	NA	NA	-1.84556	6.56891	-3.09713	0.00786999	0.0372359	-3.28884
4203_at	YDR250C	NA	-1.84544	9.41115	-3.11883	0.00753791	0.0361224	-3.24649
4820_at	YJL078C	PRY3	1.84474	7.99369	5.08404	0.000166054	0.0023074	0.594135
7773_at	YHR066W	SSF1	1.84464	6.58344	4.05837	0.00117182	0.00904042	-1.39043
7323_at	NA	NA	-1.84458	5.99485	-3.10946	0.00767947	0.0365941	-3.26477
4037_at	YOL057W	NA	-1.8425	4.70777	-6.55359	1.27773e-05	0.000357114	3.22199
3792_s_at	YGL208W	SIP2	-1.83927	10.6911	-3.76914	0.00207039	0.0136975	-1.96278
9578_at	YJR128W	NA	-1.83838	5.90663	-2.37608	0.0323	0.106906	-4.64998
4897_at	YLL061W	MMP1	1.83819	6.50446	5.30029	0.00011177	0.00179582	0.998695
10318_at	YER034W	NA	1.83776	5.10115	5.20619	0.00013268	0.00200092	0.823359
7237_at	YLR219W	MSC3	1.83628	5.9777	5.05299	0.000175853	0.00238262	0.535597
4995_at	YER018C	SPC25	1.83523	5.36119	3.36954	0.00457716	0.0252082	-2.75398
9988_at	YDR050C	TPI1	-1.83515	5.75931	-3.44178	0.00396427	0.0226339	-2.61127
10956_at	YNL112W	DBP2	1.83461	8.01607	5.3555	0.000101126	0.00167675	1.10106
6941_s_at	YLR085C	ARP6	-1.834	7.18057	-5.07048	0.000170262	0.00234424	0.568584
7119_at	YPR179C	HDA3	1.83393	6.39246	4.70319	0.000338324	0.00370632	-0.131438
4775_at	YFR025C	HIS2	1.83278	8.45849	3.00384	0.00947113	0.0426498	-3.4703
7087_at	YGR076C	MRPL25	1.83104	4.76324	5.5157	7.58164e-05	0.00136367	1.39586
3717_s_at	NA	NA	-1.82935	3.50283	-4.30055	0.000731309	0.00637221	-0.913993
4988_at	YOR147W	MDM32	1.82655	8.65363	5.00338	0.000192776	0.0025194	0.441808
6385_at	YBR086C	IST2	1.82567	6.72687	3.42825	0.0040725	0.0231668	-2.63804
7737_at	YKL110C	KTI12	-1.82562	6.12471	-2.1094	0.0533787	0.154748	-5.11754
2709_s_at	YAR023C	NA	-1.82546	4.97416	-4.32078	0.000703244	0.00621077	-0.874367
8353_at	YBR193C	MED8	1.82448	5.63653	5.0302	0.000183427	0.00245338	0.492547
7892_at	YOR037W	CYC2	-1.82404	6.18632	-3.10973	0.00767544	0.0365936	-3.26426
6216_at	YLR011W	LOT6	-1.82355	7.34913	-2.85295	0.0127661	0.0526886	-3.76123
4146_at	YBR154C	RPB5	1.82194	6.35986	4.01894	0.00126594	0.00959993	-1.46831
6218_at	NA	NA	1.82137	7.02911	5.49747	7.83281e-05	0.00139275	1.3625
5591_at	YJR056C	NA	1.81997	5.48666	4.89327	0.000236642	0.00289902	0.232681
6859_at	YGR250C	NA	1.81929	7.31424	5.18794	0.000137186	0.00204252	0.789227
3283_f_at	NA	NA	-1.81843	7.77664	-4.65808	0.000368512	0.00389273	-0.218395
5264_at	YNL264C	PDR17	-1.8181	8.77603	-2.89446	0.0117612	0.0499047	-3.68154
2741_s_at	YKL151C	NA	-1.81747	2.97637	-4.76258	0.000302434	0.00343875	-0.0172788
9689_at	NA	NA	-1.81681	5.99424	-2.65386	0.0188749	0.0711906	-4.13887
5299_at	YDL098C	SNU23	1.81638	4.65302	4.36616	0.000644237	0.00583879	-0.78558
6077_at	YDR267C	NA	-1.81599	8.51955	-5.03015	0.000183445	0.00245338	0.492448
7399_at	YJL029C	VPS53	-1.81597	7.49489	-6.81459	8.35802e-06	0.000257499	3.65768
9564_at	YLR325C	RPL38	-1.81556	9.17303	-5.54496	7.19579e-05	0.00130941	1.44935
5778_at	YDR167W	TAF10	1.81513	8.61209	5.57348	6.8393e-05	0.00126426	1.50138
6244_at	YBR198C	TAF5	1.81439	7.95914	7.62484	2.37098e-06	0.000102945	4.9504
7199_at	YOR141C	ARP8	1.81431	8.62353	4.67239	0.000358646	0.00385266	-0.19079
2276_at	YML111W	BUL2	-1.81418	6.96179	-3.33424	0.00491035	0.0264807	-2.82361
7149_at	NA	NA	1.81261	8.05139	5.00815	0.000191077	0.00251635	0.450843
4314_at	YDR541C	NA	1.8115	8.61375	3.39086	0.00438706	0.0244339	-2.7119
3180_f_at	YPL249C	GYP5	-1.81041	3.69884	-3.26225	0.00566693	0.0294384	-2.96537
10038_i_at	YLR144C	ACF2	1.80825	8.88056	4.14629	0.00098688	0.00791454	-1.21708
5104_at	YLR009W	RLP24	-1.80796	8.78165	-2.08386	0.055961	0.160688	-5.16088
4549_at	YNL123W	NA	1.80782	7.5271	5.23867	0.000125037	0.00191035	0.884003
10217_at	YOR208W	PTP2	-1.80737	7.00008	-3.10394	0.00776427	0.0368852	-3.27556
11164_at	YGL093W	SPC105	1.80635	7.69677	4.66927	0.000360776	0.00385779	-0.196815
9372_at	YOR001W	RRP6	1.80485	4.72663	3.77401	0.00205055	0.0135979	-1.95313
7462_at	YFR017C	NA	1.80468	7.4371	4.55298	0.000450117	0.00451811	-0.421742
7109_at	YER125W	RSP5	1.80417	6.37991	5.34776	0.000102551	0.00169137	1.08674
8351_at	YGR208W	SER2	1.80404	5.185	6.03358	3.06058e-05	0.000690109	2.32559
11299_at	YKL053C-A	MDM35	-1.8036	6.26076	-3.14474	0.00715938	0.0348088	-3.19584
6623_at	YNL169C	PSD1	-1.80286	8.9102	-4.16031	0.000960273	0.00773438	-1.18948
7845_s_at	NA	NA	1.8015	8.96301	7.68308	2.17279e-06	9.84612e-05	5.03989
6101_at	YKL081W	TEF4	-1.80139	8.6232	-5.78994	4.66808e-05	0.000964083	1.89272
10480_at	YKL190W	CNB1	-1.7995	5.87955	-2.85065	0.0128242	0.052877	-3.76564
3636_f_at	YLR329W	REC102	-1.79921	5.06894	-5.60773	6.4355e-05	0.00121365	1.56371
2994_s_at	YHR043C	DOG2orDOG1	-1.79818	2.90966	-9.67459	1.39411e-07	1.22773e-05	7.84507
6639_at	YPL093W	NOG1	1.79779	5.57293	6.40207	1.64173e-05	0.000431867	2.9647
5127_at	YLR350W	ORM2	1.79624	6.60432	4.4015	0.000601821	0.00558449	-0.716539
10281_at	YGR196C	FYV8	-1.79537	5.77577	-5.12032	0.000155318	0.00223404	0.6624
5186_at	YLR185W	RPL37AorRPL37B	1.79451	6.74576	5.00723	0.000191404	0.00251635	0.449102
7059_at	YER094C	PUP3	1.7928	10.4933	6.68099	1.03743e-05	0.000304542	3.43584
10685_at	YKL063C	NA	1.79263	4.05776	5.00576	0.000191927	0.00251635	0.446315
5266_at	YIL054W	NA	1.79117	8.7177	4.07805	0.00112756	0.00877876	-1.3516
7554_at	YGR038W	ORM1	-1.78868	3.06937	-6.7732	8.93445e-06	0.000269913	3.58922
11079_at	YOR321W	PMT3	-1.78818	8.38555	-2.64259	0.0192949	0.0723074	-4.16
9392_at	YLR047C	NA	1.78778	5.54687	4.93913	0.000217235	0.00272906	0.319941
7219_at	NA	NA	1.78592	7.27861	4.79121	0.000286556	0.00330823	0.0376447
6450_at	YKL085W	MDH1	1.78263	8.45895	4.20688	0.00087705	0.00722618	-1.09786
9904_at	YDR224C	HTB1	-1.78231	4.72331	-3.75419	0.00213251	0.0140487	-1.99241
5114_at	YLR016C	NA	-1.78162	8.04481	-3.60077	0.00289025	0.0178679	-2.29653
10578_at	YLR211C	NA	-1.78135	5.69412	-4.41307	0.000588562	0.00547889	-0.69395
6358_at	NA	NA	1.77952	6.62807	4.5769	0.000430036	0.00438058	-0.37537
5141_at	YOR345C	NA	1.77924	10.0145	6.42046	1.59227e-05	0.000422268	2.9961
4741_at	YLR031W	NA	-1.77909	7.02779	-3.32574	0.00499412	0.0267605	-2.84036
10182_at	YLR390W	ECM19	-1.77859	8.11878	-3.46058	0.00381877	0.0219509	-2.5741
6835_at	YML042W	CAT2	1.77851	6.4663	4.75155	0.000308788	0.00348409	-0.0384503
8373_at	YGR120C	COG2	-1.77764	6.86666	-3.77287	0.00205516	0.0136064	-1.95538
9446_at	YKL190W	CNB1	-1.77662	4.0322	-1.85499	0.0847576	0.220565	-5.53613
11209_at	YER037W	PHM8	1.77572	6.6446	3.73691	0.00220667	0.0144051	-2.02666
8589_at	YGL120C	PRP43	1.77278	6.81011	2.45986	0.0275032	0.0947388	-4.4981
8922_at	YER046W	SPO73	1.77186	7.04357	3.13421	0.00731092	0.0353727	-3.21644
6828_at	YGR044C	RME1	1.77096	9.82704	4.90417	0.000231873	0.00285029	0.253439
7255_at	YJR077C	MIR1	1.77027	9.24929	5.46715	8.27012e-05	0.00144572	1.30688
3728_f_at	YDL003W	MCD1	-1.76988	6.52963	-5.90934	3.79183e-05	0.000830031	2.10586
4128_at	YAR062W	NA	1.76929	9.96264	5.19715	0.000134894	0.00203102	0.80645
7275_at	YGR268C	HUA1	-1.76788	7.40873	-3.79163	0.00198037	0.0132364	-1.91821
7370_at	YKR006C	MRPL13	1.76581	7.80916	3.16297	0.00690453	0.0339409	-3.16017
10178_at	YPR031W	NA	-1.7657	3.35867	-5.46888	8.24448e-05	0.00144394	1.31006
9772_at	YOR083W	WHI5	-1.76437	6.50199	-2.75283	0.015548	0.0615003	-3.95214
6370_at	YGR147C	NAT2	-1.76414	6.05172	-2.42942	0.0291615	0.0987388	-4.55352
5679_at	YIL108W	NA	-1.76371	7.41697	-2.27798	0.0389249	0.123091	-4.82495
4342_at	YDL044C	MTF2	-1.76273	9.70757	-3.14131	0.00720842	0.0349562	-3.20255
7096_at	YOR022C	NA	1.76229	7.57059	5.0259	0.000184894	0.00246569	0.484417
9151_at	YGR165W	MRPS35	1.76117	9.63098	5.41819	9.03084e-05	0.00154969	1.21682
11114_at	YIL078W	THS1	1.76032	8.72135	8.61157	5.71203e-07	3.49593e-05	6.40752
7415_at	NA	NA	-1.75949	6.54118	-2.59026	0.0213664	0.0783714	-4.25769
2507_s_at	YHL025W	SNF6	-1.75927	3.61978	-2.16646	0.0480032	0.143029	-5.01973
11001_at	YCR008W	SAT4	1.75801	8.34238	4.63476	0.000385196	0.00403117	-0.263429
2204_s_at	YHL024W	RIM4	-1.75782	6.37074	-2.9891	0.00975202	0.0435366	-3.49887
6507_at	YJL203W	PRP21	1.75743	9.77442	4.5964	0.000414349	0.00425517	-0.337602
4312_at	YGL019W	CKB1	1.75678	6.1333	3.43611	0.00400924	0.0228627	-2.62248
6125_at	YLR292C	SEC72	1.75675	8.09163	5.21066	0.000131599	0.00198837	0.831718
5069_at	YLR365W	NA	1.75673	7.62644	5.10331	0.000160258	0.00227357	0.630421
6199_at	YPR060C	ARO7	1.75636	5.83337	7.54231	2.68517e-06	0.000112404	4.8228
4448_at	YDL045C	FAD1	1.7553	4.65452	3.85304	0.00175428	0.0121036	-1.79654
11370_at	YMR084W	NA	1.7553	8.72502	2.68991	0.01759	0.0674067	-4.0711
6170_at	YMR029C	FAR8	1.7547	6.81566	3.36667	0.00460341	0.0252782	-2.75965
4656_f_at	YML015C	TAF11	-1.75399	4.37942	-2.33135	0.0351762	0.11382	-4.73016
9380_at	YGR265W	NA	1.75311	5.81991	7.57224	2.56645e-06	0.000109397	4.86917
6942_at	YML037C	NA	-1.75015	6.80582	-6.98554	6.36113e-06	0.000215149	3.93792
7367_at	YBL025W	RRN10	-1.74997	5.61099	-3.74123	0.00218789	0.0143226	-2.0181
7080_at	YOL097C	WRS1	1.74848	12.7724	7.758	1.94318e-06	9.16142e-05	5.15437
10740_at	YJL170C	ASG7	-1.74769	7.13332	-2.75081	0.0156098	0.0617185	-3.95597
10990_at	YML035C	AMD1	1.74706	8.39427	6.15757	2.47668e-05	0.000588291	2.54275
4971_at	YPR189W	SKI3	1.74701	6.50806	3.35544	0.00470747	0.0256959	-2.78181
2580_at	YER171W	RAD3	-1.74661	4.91864	-4.95322	0.000211608	0.00268876	0.346709
10961_at	YPL063W	TIM50	1.74659	7.72927	5.90859	3.79671e-05	0.000830031	2.10454
11008_at	YLR436C	ECM30	1.74638	4.77849	5.504	7.74187e-05	0.00137921	1.37445
4802_i_at	YJL217W	NA	1.74535	10.3802	4.06073	0.00116642	0.00901367	-1.38577
7201_at	YPR051W	MAK3	1.74465	10.1846	5.37122	9.82915e-05	0.00163924	1.13014
5381_at	YBR188C	NTC20	-1.74279	6.81924	-1.50466	0.154614	0.350236	-6.05655
10286_at	YJR024C	NA	-1.74062	5.45299	-5.09886	0.000161578	0.00228189	0.622044
11190_at	YGR169C	PUS6	1.74032	4.58757	6.98685	6.34797e-06	0.000215149	3.94004
7795_at	YDR538W	PAD1	1.73985	8.75707	4.88562	0.00024005	0.00293692	0.218101
7925_at	YPR028W	YOP1	-1.73918	5.70717	-2.24872	0.0411371	0.127962	-4.87651
8252_at	NA	NA	1.73897	6.86289	3.58111	0.00300527	0.0184446	-2.33548
9959_at	NA	NA	1.73849	8.5775	2.51525	0.0247137	0.0878029	-4.39653
10999_at	YGR132C	PHB1	1.73665	7.64201	3.95718	0.00142907	0.0103655	-1.59038
6839_at	YNL295W	NA	1.73534	6.02192	4.10134	0.00107738	0.00848719	-1.30566
8558_at	YLR335W	NUP2	-1.7344	3.71229	-3.5011	0.00352315	0.020763	-2.49394
7912_at	YJL198W	PHO90	-1.73399	7.11387	-2.79451	0.0143244	0.0575797	-3.87289
4327_at	NA	NA	-1.73058	3.88063	-5.8072	4.52933e-05	0.000943779	1.92365
9949_at	YLR298C	YHC1	-1.72967	5.54438	-3.87514	0.00167948	0.0116651	-1.75276
7309_at	YGR267C	FOL2	-1.7275	9.14612	-3.91105	0.00156478	0.0110913	-1.68166
6392_at	YGL113W	SLD3	1.72689	7.81039	5.00728	0.000191387	0.00251635	0.44919
10698_at	YIL022W	TIM44	1.72641	6.83854	5.39188	9.4693e-05	0.00160388	1.1683
7955_at	YFL003C	MSH4	-1.72624	4.1808	-5.53715	7.29667e-05	0.00132518	1.43509
8980_at	YNR033W	ABZ1	1.72413	6.25958	3.1989	0.00642832	0.0321416	-3.08978
6532_at	YPR029C	APL4	1.72348	7.90091	6.04584	2.99687e-05	0.000679025	2.34717
2163_s_at	YOL090W	MSH2	1.72286	10.0359	4.25656	0.000796392	0.00677027	-1.00029
8647_at	YLR348C	DIC1	1.72064	9.82071	5.44409	8.61973e-05	0.0014901	1.2645
3237_f_at	NA	NA	-1.71992	6.94155	-3.53488	0.00329432	0.0197638	-2.42705
11106_at	YPL194W	DDC1	1.71977	4.33536	5.65189	5.95122e-05	0.00113968	1.64385
6645_at	YHL048W	COS8	1.71623	6.15158	3.82881	0.00184019	0.0125307	-1.84454
11028_at	YGL115W	SNF4	1.71504	6.59887	3.49615	0.00355802	0.0209341	-2.50374
4444_at	YBR264C	YPT10	1.71424	6.33825	2.10274	0.0540411	0.156278	-5.12886
6043_at	YBL038W	MRPL16	-1.7142	6.13387	-5.8171	4.45167e-05	0.000929672	1.94138
4216_at	YDR475C	NA	-1.71403	4.77859	-3.12212	0.00748873	0.0359791	-3.24006
4821_at	YDR328C	SKP1	-1.71383	4.50182	-1.77394	0.0977954	0.245981	-5.66279
2722_g_at	YGL067W	NPY1	-1.71356	3.0588	-7.45494	3.0662e-06	0.000123375	4.68671
8449_at	YLR293C	GSP1	-1.71324	11.1154	-2.81499	0.0137583	0.0557713	-3.83384
4926_at	YJR010C-A	SPC1	-1.70856	3.49882	-4.19099	0.000904596	0.00738793	-1.12912
10633_at	YDL110C	NA	1.70795	6.10701	5.28274	0.000115392	0.00183507	0.966079
4508_at	YNL221C	POP1	1.70695	5.27409	4.19677	0.000894477	0.00733738	-1.11775
5528_at	YMR143W	RPS16AorRPS16B	1.70417	8.90736	5.51687	7.56582e-05	0.00136345	1.398
8171_at	NA	NA	-1.70376	5.28005	-3.71152	0.00232044	0.0149906	-2.07701
6323_at	YOR080W	DIA2	1.70304	7.54663	4.51785	0.000481375	0.00475014	-0.489935
3735_f_at	YDR133C	NA	-1.7018	10.9598	-3.78078	0.0020233	0.0134431	-1.93972
6456_at	YKR003W	OSH6	1.70126	5.39699	6.23648	2.16696e-05	0.000529544	2.67983
4130_at	YIL084C	SDS3	1.7011	6.25904	4.08987	0.00110181	0.00861425	-1.32829
6054_at	YMR176W	ECM5	-1.70065	7.55498	-3.06125	0.00845139	0.0391726	-3.35876
6924_at	YOR389W	NA	1.7005	6.53521	4.81849	0.000272232	0.00318818	0.0898842
4129_at	NA	NA	1.69971	10.7882	5.56395	6.95632e-05	0.00128081	1.48401
8180_at	YBR292C	NA	-1.69924	7.65976	-1.85858	0.0842168	0.21966	-5.53043
9981_at	YKL072W	STB6	-1.69717	6.88995	-5.61435	6.36031e-05	0.00120189	1.57575
7106_at	YCL046W	NA	1.69677	9.52367	4.37161	0.000637501	0.00580592	-0.774926
10185_s_at	YCR006C	NA	1.69659	10.5217	7.70894	2.09046e-06	9.61301e-05	5.07949
8605_at	YEL072W	RMD6	1.69541	9.18582	6.93442	6.89949e-06	0.000223635	3.85453
4812_at	YML122C	NA	1.69525	6.69819	8.20949	1.00596e-06	5.49157e-05	5.82872
3426_f_at	YFL009W	CDC4	-1.69522	7.31011	-5.01308	0.000189338	0.00249996	0.460176
10995_at	YGR153W	NA	1.69439	6.5002	5.22223	0.000128848	0.00195895	0.853315
10654_at	YJL139C	YUR1	1.69431	9.2216	4.6237	0.000393376	0.00408927	-0.284797
9679_at	YJR018W	NA	-1.69377	6.79304	-2.28295	0.0385608	0.122206	-4.81617
3413_f_at	NA	NA	-1.6915	7.22337	-5.27101	0.000117882	0.00186051	0.944249
3093_f_at	YDR478W	SNM1	-1.69139	3.61744	-2.38452	0.0317825	0.10561	-4.63477
5057_at	YKR057W	RPS21A	1.68997	8.79037	4.41152	0.000590321	0.00548869	-0.696975
9173_at	YPR116W	NA	-1.68987	5.0348	-3.73573	0.00221184	0.0144288	-2.02901
4583_at	YPL111W	CAR1	1.68907	6.49546	5.27977	0.000116018	0.00184188	0.960552
5273_at	NA	NA	1.6873	6.89796	5.7642	4.88336e-05	0.000981495	1.84651
11143_at	YHR069C	RRP4	1.68709	5.39541	4.32955	0.000691425	0.00614125	-0.8572
5567_at	YDR053W	NA	1.68686	7.04589	5.21052	0.000131635	0.00198837	0.831442
4151_at	YLR213C	CRR1	-1.68655	7.95111	-2.81834	0.0136678	0.0555217	-3.82744
4860_at	YDR327W	NA	1.68582	6.44623	6.89929	7.29699e-06	0.000231692	3.79704
11170_at	YHR057C	CPR2	-1.68514	5.59592	-5.19193	0.000136189	0.00204064	0.796686
6219_at	YBL037W	APL3	1.68512	11.3161	10.2181	7.08637e-08	6.89076e-06	8.53171
3580_f_at	YEL019C	MMS21	-1.68509	6.45031	-4.38543	0.000620737	0.00569212	-0.747915
7543_at	YBL091C	MAP2	1.68476	10.6169	6.6609	1.07193e-05	0.000312702	3.40227
10954_at	YOL148C	SPT20	1.68449	9.5142	4.34171	0.000675364	0.00603882	-0.833391
5746_at	YER002W	NOP16	-1.68377	6.30041	-4.25635	0.000796714	0.00677027	-1.00069
9753_at	YLR267W	NA	1.68376	7.18308	4.43553	0.000563678	0.00531508	-0.650134
11065_at	YNL067W	RPL9B	1.6833	8.90545	3.59233	0.00293906	0.0180977	-2.31325
10144_at	YHR005C-A	MRS11	1.68159	9.09775	1.76246	0.099779	0.249585	-5.68044
2282_s_at	NA	NA	-1.68122	3.29295	-2.94973	0.0105431	0.0458904	-3.57503
4176_at	YKR001C	VPS1	1.68027	7.83911	2.86051	0.0125769	0.0521539	-3.74673
3779_f_at	YEL057C	NA	-1.68023	7.49667	-4.92662	0.00022236	0.00277133	0.296159
2783_g_at	YNR024W	NA	-1.68022	4.39175	-4.49651	0.000501444	0.00486588	-0.531409
8965_at	YFR012W	NA	-1.67957	8.40595	-1.61341	0.128942	0.305191	-5.90283
11210_at	YIR026C	YVH1	1.6779	5.23517	4.39691	0.000607162	0.00559512	-0.725499
5779_at	YEL017C-A	PMP2	1.67698	6.01215	3.47015	0.00374681	0.0216433	-2.55518
7963_at	YOR221C	MCT1	-1.67668	5.57634	-2.89007	0.0118638	0.0501124	-3.69
4808_at	YGL186C	TPN1	-1.67591	9.70367	-3.00387	0.00947052	0.0426498	-3.47024
10591_at	YHR021C	RPS27B	1.67471	6.18859	3.99273	0.00133271	0.00992092	-1.5201
10663_at	YDL099W	NA	1.67465	9.18824	6.84179	8.00061e-06	0.000248546	3.70255
5643_at	YJR108W	ABM1	-1.67281	8.00823	-2.28127	0.0386838	0.122428	-4.81915
6027_at	YLR280C	NA	-1.67275	4.77955	-4.5096	0.000489033	0.00478023	-0.505962
11214_at	NA	NA	-1.67207	5.7196	-7.97501	1.41167e-06	7.04704e-05	5.48179
4896_at	NA	NA	1.672	5.80254	4.73856	0.000316451	0.00355056	-0.0634076
4911_at	YJL173C	RFA3	1.67172	6.17283	4.06083	0.0011662	0.00901367	-1.38559
7146_at	YPR159W	KRE6	1.67124	9.00531	6.33514	1.83582e-05	0.000465689	2.85002
4888_at	YIL043C	CBR1	-1.67053	3.6573	-2.69699	0.0173476	0.0668416	-4.05775
7179_at	YOR353C	SOG2	1.67005	7.83942	2.26258	0.0400751	0.125495	-4.85213
7769_at	YGR172C	YIP1	-1.66842	10.287	-2.65746	0.0187424	0.0708056	-4.13211
4337_at	YBR183W	YPC1	1.66796	8.22649	1.9696	0.0689803	0.188394	-5.35128
7450_at	YBR254C	TRS20	1.66728	10.9921	5.86758	4.07688e-05	0.000876842	2.03154
6198_at	YER024W	YAT2	-1.66728	5.14823	-4.25404	0.000800283	0.00678532	-1.00522
8845_at	YLR186W	EMG1	1.66685	6.53472	2.12786	0.0515812	0.151133	-5.08603
11034_at	YGR128C	UTP8	-1.66547	6.92423	-3.45811	0.00383764	0.0220186	-2.579
11225_at	NA	NA	1.66533	8.61362	3.48468	0.00364008	0.0211714	-2.52643
6943_g_at	YKL002W	DID4	-1.6642	8.73395	-5.05406	0.000175506	0.00238262	0.537614
10167_at	YDR411C	DFM1	1.66299	7.60912	5.56145	6.98741e-05	0.00128148	1.47944
8421_at	YDR169C	STB3	-1.66292	8.85152	-2.54266	0.023436	0.0842413	-4.34597
10333_at	YBR128C	ATG14	1.66173	8.57386	3.23961	0.00592812	0.0302895	-3.00987
5941_at	YKR096W	NA	1.66125	10.2708	5.24399	0.00012383	0.00190437	0.893926
4250_at	YGR074W	SMD1	-1.66123	4.76768	-1.54145	0.145483	0.334999	-6.0054
7174_at	NA	NA	-1.66049	7.73854	-3.23973	0.00592664	0.0302895	-3.00962
8144_g_at	YBR021W	FUR4	-1.66045	7.00633	-2.67781	0.0180115	0.0686277	-4.09389
10974_at	YBR094W	NA	1.66031	7.48705	4.26774	0.000779297	0.00664636	-0.978327
11247_s_at	YHR189W	PTH1	-1.6598	9.14979	-4.28168	0.000758539	0.00652623	-0.951002
5728_i_at	YKL117W	SBA1	1.65935	6.33299	3.29283	0.00533229	0.02814	-2.9052
8233_g_at	NA	NA	-1.65901	8.69217	-3.2618	0.005672	0.0294484	-2.96625
7917_at	YKL162C	NA	-1.6587	5.99265	-4.34277	0.000673987	0.00603228	-0.831323
7386_at	YDR511W	ACN9	1.65715	7.98376	4.61124	0.000402807	0.00416413	-0.308885
10766_at	YNL269W	BSC4	1.65558	7.39641	3.62253	0.00276809	0.0172843	-2.2534
8861_at	YCR020C	PET18	-1.65543	7.01228	-2.31187	0.0365032	0.11722	-4.76488
9561_at	YPL203W	TPK2	-1.65534	6.52888	-4.75189	0.000308591	0.00348409	-0.0378003
4359_at	YDR156W	RPA14	-1.65519	4.86763	-1.6446	0.122291	0.292939	-5.85738
4847_at	YBR291C	CTP1	1.65516	8.48312	4.87499	0.000244874	0.00296417	0.197819
8211_at	YDR085C	AFR1	-1.65455	6.97903	-4.27686	0.000765646	0.00655716	-0.960441
7675_at	YHR090C	YNG2	-1.65433	2.97938	-5.68039	5.65892e-05	0.00110284	1.69545
3050_at	NA	NA	-1.6531	5.05507	-1.9945	0.065927	0.182457	-5.31029
6649_at	YER009W	NTF2	-1.65238	4.11518	-2.78545	0.014582	0.0583718	-3.89014
6160_at	NA	NA	1.65183	8.18131	4.16279	0.000955649	0.00770379	-1.1846
6354_at	YOR264W	DSE3	-1.65036	7.70485	-2.23795	0.0419806	0.129593	-4.8954
3498_f_at	YHR192W	NA	-1.64758	7.07406	-4.6802	0.00035338	0.00381805	-0.17574
4756_at	YNL258C	DSL1	1.64737	5.76805	4.23745	0.000826472	0.0069256	-1.03779
6119_at	NA	NA	-1.64718	10.3946	-2.26555	0.0398506	0.124988	-4.84689
4964_at	YHL031C	GOS1	1.64561	5.3611	3.98865	0.00134344	0.00996446	-1.52817
5732_at	YJL148W	RPA34	1.64408	9.26639	3.16115	0.00692958	0.0340282	-3.16374
7801_at	YIL060W	NA	1.64397	9.23339	4.85674	0.000253384	0.00303249	0.162996
4499_at	YFL051C	NA	1.64393	9.47105	3.87902	0.0016667	0.0115936	-1.74508
4840_at	YKL099C	UTP11	1.64313	9.95752	6.99416	6.27483e-06	0.000214563	3.95194
8254_at	YIL077C	NA	1.64232	6.9096	5.31443	0.000108937	0.00176856	1.02495
4546_at	YER056C-A	RPL34BorRPL34A	-1.64143	8.59201	-3.1421	0.00719714	0.0349196	-3.20101
10174_at	YOL112W	MSB4	-1.6404	8.10241	-1.60442	0.130916	0.308845	-5.91582
7791_at	NA	NA	1.63989	6.77062	4.20813	0.000874921	0.00722139	-1.0954
6399_at	YDL025C	NA	1.63986	6.8927	2.9241	0.0110917	0.0476929	-3.62449
5402_at	YHR121W	LSM12	1.63894	8.24419	3.07528	0.00821915	0.0384847	-3.33144
10127_at	NA	NA	1.63875	5.56358	4.87373	0.000245453	0.00296417	0.19541
6576_at	YGR269W	NA	1.63861	6.57079	4.43854	0.000560426	0.00529512	-0.644265
8853_at	YGR199W	PMT6	-1.63711	6.18662	-4.93846	0.000217506	0.00272906	0.318668
7794_at	YER079W	NA	1.63594	10.7728	7.07629	5.51164e-06	0.000193425	4.08503
5068_at	YLR194C	NA	1.63231	8.94501	6.5611	1.26205e-05	0.000353791	3.23466
9382_at	YFR004W	RPN11	1.62988	9.98986	7.55727	2.62513e-06	0.000110854	4.84599
5268_at	YGL249W	ZIP2	-1.62965	7.46337	-2.19328	0.0456556	0.137793	-4.97333
6554_at	YDR485C	VPS72	1.62941	6.77265	3.06812	0.00833678	0.0388925	-3.34537
5726_at	YLR206W	ENT2	1.62913	6.03601	4.81789	0.00027254	0.00318818	0.088729
5681_at	YDR344C	NA	1.62668	7.80976	5.77961	4.75327e-05	0.000970657	1.87418
10617_at	YJR044C	VPS55	1.62647	9.79517	4.37024	0.000639181	0.00581555	-0.777595
8457_at	YJL215C	NA	-1.62556	8.07743	-2.99298	0.00967727	0.0433276	-3.49135
11312_at	YJR079W	NA	1.62415	6.3142	4.53443	0.000466348	0.00462631	-0.457728
7198_at	YAL023C	PMT2	1.6234	3.8027	6.03939	3.03023e-05	0.000684921	2.33581
4949_at	YEL048C	NA	1.61973	10.8562	4.5455	0.000456593	0.00455374	-0.436254
4877_at	YPR185W	ATG13	1.61967	5.20974	3.06514	0.00838633	0.0389989	-3.35119
6435_at	YOR238W	NA	1.61957	6.38622	4.77443	0.000295752	0.00338339	0.00547021
5008_at	YML034W	SRC1	-1.61939	7.8402	-1.85829	0.0842613	0.219715	-5.5309
6851_at	NA	NA	1.61938	9.90119	5.46552	8.29445e-05	0.00144727	1.30387
8541_at	YJL009W	NA	-1.61825	4.85173	-3.67703	0.00248452	0.0158856	-2.14537
8192_at	YDR311W	TFB1	1.61759	10.3194	1.3549	0.196891	0.41949	-6.25538
8291_at	YGR136W	LSB1	-1.61591	7.78261	-2.35358	0.0337173	0.110091	-4.69038
4450_at	YJL136C	RPS21AorRPS21B	1.61413	5.42078	4.31157	0.000715889	0.00627895	-0.892415
7382_at	YBR189W	RPS9AorRPS9B	1.6137	7.94654	4.48599	0.000511652	0.00492907	-0.551866
5421_i_at	NA	NA	-1.61369	6.36707	-3.54418	0.00323406	0.0194774	-2.40865
8646_at	YMR172C-A	NA	1.61353	8.63727	3.08229	0.00810548	0.0380416	-3.31777
8296_at	YPL062W	NA	-1.61316	5.28574	-3.34719	0.00478538	0.0259815	-2.79808
3543_s_at	YIL160C	POT1	-1.61272	9.08484	-5.95131	3.52621e-05	0.00078188	2.18034
5536_at	NA	NA	1.61256	6.52584	3.14643	0.00713539	0.0347283	-3.19254
7944_at	YMR107W	SPG4	1.61241	9.86397	6.62969	1.12791e-05	0.00032397	3.35001
8467_at	YGR133W	PEX4	-1.61163	3.60873	-3.12471	0.00745029	0.0358682	-3.235
10062_at	YOR350C	MNE1	-1.61061	8.9531	-2.8792	0.0121212	0.0508317	-3.71087
8808_at	YBR244W	GPX2	1.60971	8.37385	5.57552	6.81449e-05	0.00126217	1.5051
5753_at	YGL106W	MLC1	1.60927	10.2418	7.55447	2.63627e-06	0.000110854	4.84164
4838_at	YGR064W	NA	1.60783	6.65092	3.55045	0.00319398	0.0193358	-2.39622
4948_at	YLR050C	NA	-1.60689	9.69232	-3.52191	0.00338041	0.0201251	-2.45275
9972_at	NA	NA	1.60625	9.91131	3.50236	0.00351435	0.0207373	-2.49144
4426_at	YJL159W	HSP150	1.60515	5.06027	5.3889	9.52035e-05	0.00160388	1.1628
7247_at	NA	NA	1.60395	8.40958	5.01946	0.000187112	0.00248462	0.472246
6529_at	YGL066W	SGF73	1.60314	7.18319	5.29781	0.000112275	0.00180083	0.994087
7099_at	YKL180W	RPL17AorRPL17B	-1.60309	8.86866	-2.16685	0.0479686	0.143013	-5.01906
2679_at	YNR011C	PRP2	-1.60278	3.44034	-5.6838	5.62502e-05	0.00109853	1.70161
9317_at	NA	NA	-1.60226	5.24746	-2.9878	0.00977721	0.043589	-3.50139
6324_g_at	YMR257C	PET111	1.60147	8.55331	4.51282	0.000486026	0.00477082	-0.4997
7409_at	YER007C-A	NA	1.60111	7.32307	2.80812	0.0139457	0.0563423	-3.84694
3920_f_at	YER031C	YPT31	-1.60029	5.96696	-6.30611	1.92736e-05	0.000481066	2.80008
7419_at	YBR131W	CCZ1	1.60021	8.19952	3.82589	0.00185082	0.0125837	-1.85032
8235_at	YMR216C	SKY1	1.59845	9.65486	3.87825	0.00166922	0.0116025	-1.7466
5635_at	YGL247W	BRR6	1.59805	8.85913	1.90775	0.0771287	0.204894	-5.45183
9583_at	YGR192C	TDH2orTDH3	-1.59775	4.2933	-2.87021	0.0123383	0.0515801	-3.72813
10030_at	YLR029C	RPL15BorRPL15A	1.59725	5.04878	3.40565	0.00425978	0.0240127	-2.68268
5920_at	YBR040W	FIG1	1.5958	10.0119	5.09504	0.000162718	0.00228761	0.614862
7222_at	YLR251W	SYM1	-1.59571	8.87428	-2.71478	0.0167532	0.0652719	-4.02417
8728_at	YER083C	RMD7	-1.59562	6.6244	-2.43283	0.0289712	0.0983597	-4.54733
6861_at	YFR053C	HXK1	1.59522	6.16504	4.16357	0.000954204	0.00770373	-1.18307
4846_at	YBR269C	NA	1.59329	7.91623	5.07571	0.000168625	0.00232857	0.578451
9945_at	YKL073W	LHS1	1.59281	4.32358	4.75483	0.000306881	0.00347662	-0.0321444
10496_at	YNL114C	NA	1.59255	5.84019	3.99649	0.00132292	0.00991127	-1.51267
4922_at	YDR068W	DOS2	1.591	7.13368	4.98719	0.000198655	0.00257264	0.411154
4503_at	YMR007W	NA	1.59085	8.36842	3.786	0.00200253	0.0133431	-1.92937
3788_f_at	YNL242W	ATG2	-1.58896	9.56111	-4.28178	0.000758382	0.00652623	-0.950794
8028_at	YOR066W	NA	1.58825	5.52882	4.20748	0.000876042	0.00722425	-1.0967
9171_at	YGL049C	TIF4632	-1.58605	8.22392	-2.14647	0.049827	0.147102	-5.05415
5699_at	YMR059W	SEN15	1.58589	4.92191	4.93636	0.000218356	0.00273605	0.314689
10941_at	YPL155C	KIP2	1.58539	8.17107	4.80116	0.000281246	0.00326953	0.056697
8564_at	NA	NA	1.58405	10.5496	6.20729	2.27653e-05	0.000549132	2.62922
10111_at	YDR142C	PEX7	-1.58301	6.74301	-3.25357	0.00576566	0.0297876	-2.98243
2848_s_at	YJL213W	NA	-1.58222	3.56015	-3.63384	0.00270669	0.0170377	-2.231
7783_at	YIL009C-A	EST3	1.58101	9.99058	5.85494	4.16752e-05	0.000884177	2.009
10674_at	YMR212C	EFR3	1.58047	9.94939	4.28374	0.000755516	0.00652623	-0.94696
5062_at	YGR086C	PIL1	1.57882	6.57846	2.87449	0.0122345	0.0512648	-3.71992
11216_at	YDR094W	NA	1.57762	5.70698	3.81799	0.00187991	0.0127258	-1.86597
5719_at	YFL010C	WWM1	1.57545	8.70723	3.74422	0.00217499	0.0142581	-2.01217
3225_f_at	YHR131C	NA	-1.5733	3.53326	-3.13563	0.00729034	0.0352984	-3.21366
10317_at	YDL113C	ATG20	1.57259	6.00327	2.64557	0.0191828	0.0720344	-4.15441
6886_at	YJL152W	NA	1.57229	5.77478	3.61602	0.0028041	0.0174044	-2.26631
6479_at	YGL108C	NA	1.57173	7.49532	4.3635	0.000647552	0.00586314	-0.790781
5657_at	YLR442C	SIR3	1.57165	6.77922	4.14647	0.000986542	0.00791454	-1.21674
7243_at	YAL043C	PTA1	1.57005	6.19914	3.69789	0.00238393	0.0152948	-2.10402
10742_at	YIL057C	NA	-1.56946	7.80002	-4.05917	0.00117	0.00903387	-1.38887
3896_s_at	YPL048W	CAM1	-1.5691	3.06434	-6.17515	2.40389e-05	0.000572457	2.57336
8899_at	YIL041W	NA	1.56787	5.74744	4.54336	0.00045846	0.00456261	-0.4404
8486_at	YFL067W	NA	-1.56751	6.04495	-3.02244	0.00912802	0.0414647	-3.4342
5399_at	YHL005C	NA	1.56638	6.8705	3.25325	0.00576925	0.0297876	-2.98305
7656_s_at	YHR198C	NA	1.56587	8.45159	3.1855	0.00660198	0.0327991	-3.11604
4855_at	YLR224W	NA	1.56567	7.58819	4.94593	0.000214501	0.0027071	0.332857
10194_at	YNL255C	GIS2	1.56492	9.98126	4.90577	0.000231182	0.00285029	0.256481
8817_at	YIL140W	AXL2	1.56366	10.6236	6.93793	6.86099e-06	0.000223635	3.86027
7736_at	YMR144W	NA	1.56363	8.62068	4.96894	0.000205508	0.00263465	0.37655
4472_s_at	YJR094W-A	RPL43B	1.56111	7.12381	5.05298	0.000175857	0.00238262	0.535571
6212_at	YNL309W	STB1	1.55925	8.51763	4.20524	0.000879855	0.00723652	-1.10109
4813_at	YNL334C	SNO2orSNO3	1.55919	5.62543	3.30296	0.00522579	0.0277639	-2.88525
9592_at	YJR013W	GPI14	-1.55885	8.80537	-7.49257	2.89551e-06	0.000118551	4.74545
11347_at	NA	NA	1.55787	8.07841	2.98742	0.00978445	0.043598	-3.50212
9668_at	YDR326C	NA	-1.55741	4.76852	-2.76443	0.0151976	0.0603444	-3.93012
6050_at	YLL045C	RPL8BorRPL8A	1.55661	5.44866	3.33556	0.00489751	0.026442	-2.82102
4805_at	NA	NA	1.55477	8.12237	3.47279	0.00372717	0.0215571	-2.54996
6299_at	YDL139C	SCM3	1.5535	8.07257	7.37666	3.45612e-06	0.000134991	4.56392
7289_at	YGR216C	GPI1	1.553	5.60609	4.00116	0.00131086	0.00986049	-1.50344
7148_at	YER187W	NA	1.55287	8.00402	5.08484	0.000165809	0.0023074	0.595642
5683_at	YFL013W-A	NA	1.55263	5.85167	4.19157	0.000903573	0.00738604	-1.12798
6438_at	YGR166W	KRE11	1.5524	5.88288	5.04393	0.000178826	0.00240886	0.518482
10992_at	YAL015C	NTG1	1.55186	7.2189	3.23665	0.00596308	0.0304182	-3.01567
6409_at	YGR273C	NA	-1.55179	5.55755	-3.25415	0.00575902	0.0297842	-2.98129
6459_at	YNL192W	CHS1	-1.55164	4.08675	-6.40185	1.64234e-05	0.000431867	2.96432
5407_at	YLR012C	NA	-1.55048	6.78059	-3.42919	0.0040649	0.0231377	-2.63618
8194_at	YMR163C	NA	-1.54994	6.96025	-1.93992	0.0727879	0.196267	-5.39976
2338_at	YBL049W	MOH1	-1.54847	3.6788	-5.81942	4.4337e-05	0.000927995	1.94552
5629_at	YDR021W	FAL1	-1.54702	7.6275	-1.63598	0.124098	0.296508	-5.87
4923_at	YBR165W	UBS1	1.54701	11.1217	3.2994	0.00526297	0.0278848	-2.89226
5813_at	YHR180W	NA	1.54625	8.11282	4.78215	0.000291485	0.00334688	0.0202723
4966_at	YGL141W	HUL5	1.54598	3.93743	3.66657	0.00253659	0.0161521	-2.16612
6292_at	NA	NA	1.54499	8.81624	3.50121	0.00352241	0.020763	-2.49373
9126_at	YDR130C	FIN1	-1.54483	7.96685	-3.4936	0.00357605	0.020982	-2.50877
9454_at	YGL148W	ARO2	1.54317	6.28797	3.45415	0.00386791	0.0221244	-2.58681
4834_at	YCR027C	RHB1	1.54313	6.80662	3.83297	0.00182512	0.0124634	-1.83629
6369_at	YGR021W	NA	1.54257	6.43328	3.3724	0.0045512	0.0251542	-2.74834
7839_at	YBR153W	RIB7	1.54249	9.46656	6.00359	3.2224e-05	0.00072137	2.27274
9370_at	YDR296W	MHR1	1.54169	7.02272	3.37601	0.00451858	0.0250035	-2.74121
9180_at	YKL079W	SMY1	1.53893	7.80675	2.484	0.0262522	0.0917858	-4.45394
6091_at	YGR218W	CRM1	1.53886	6.54796	4.59375	0.000416451	0.00427206	-0.342746
6871_at	YDL210W	UGA4	1.53737	7.33006	3.30852	0.00516826	0.0275375	-2.87429
4865_at	YBR189W	RPS9AorRPS9B	1.53716	6.25941	3.24158	0.00590487	0.0302535	-3.00599
4376_at	YDR533C	HSP31	1.5371	10.1683	2.93406	0.0108752	0.0468699	-3.60527
2843_at	YNL178W	RPS3	-1.53653	6.32644	-2.20161	0.0449479	0.136363	-4.95885
5043_at	YBL089W	AVT5	1.53626	7.00481	3.99557	0.00132531	0.00991755	-1.51449
10124_at	YNL304W	YPT11	-1.53601	4.57656	-2.48634	0.0261341	0.0914743	-4.44966
8067_i_at	YNR017W	MAS6	-1.53592	5.53939	-4.08473	0.00111294	0.00868672	-1.33844
10169_at	YKL199C	PTK1	-1.53532	8.57727	-2.24577	0.0413664	0.128334	-4.88169
8637_at	YHL034C	SBP1	-1.53513	6.51726	-2.4678	0.0270853	0.0937837	-4.48358
4754_at	YJL109C	UTP10	1.53478	10.3324	7.75863	1.94137e-06	9.16142e-05	5.15533
6072_at	YGR272C	NA	1.53449	8.15232	2.34259	0.0344315	0.111953	-4.71008
4997_at	YLL054C	NA	1.53392	6.6997	3.40179	0.00429263	0.0241105	-2.69031
5388_at	YMR078C	CTF18	1.53307	6.51758	4.20967	0.000872316	0.00720626	-1.09239
8667_at	YGL198W	YIP4	-1.53268	5.55324	-3.94446	0.00146525	0.0106005	-1.61555
10296_at	YEL049W	PAU4orPAU6orPAU1orPAU2orDAN3	-1.53213	7.73346	-3.2332	0.00600415	0.0305943	-3.02245
5374_at	YGL261C	PAU4orPAU6orPAU1orPAU2orDAN3	1.53212	8.02735	5.23879	0.00012501	0.00191035	0.884229
7308_at	YNL140C	RLR1	1.53189	8.08433	3.08157	0.00811704	0.0380576	-3.31917
8412_at	YDL195W	SEC31	1.53187	9.26566	7.20114	4.53327e-06	0.000168598	4.28557
6709_i_at	YDR233C	RTN1	-1.53092	8.7574	-2.54818	0.0231866	0.0836024	-4.33577
10947_at	YGR210C	NA	1.53065	6.50612	3.6837	0.00245188	0.0157092	-2.13214
5677_at	YGR090W	UTP22	1.53051	8.3998	3.13176	0.00734652	0.0354784	-3.22121
7403_at	YHR072W	ERG7	1.53042	7.90839	3.99231	0.00133381	0.00992124	-1.52093
4284_at	YBL043W	ECM13	1.52786	7.89424	3.49456	0.00356929	0.0209555	-2.50689
3723_f_at	YJR063W	RPA12	-1.52669	7.82306	-4.1927	0.000901583	0.00738267	-1.12575
10944_at	YBL061C	SKT5	1.52645	7.72658	2.44744	0.0281684	0.0963194	-4.52074
11377_at	YGR136W	LSB1	-1.52636	5.6489	-3.32686	0.00498298	0.0267488	-2.83815
9932_at	YLR073C	NA	-1.52547	10.3009	-3.10282	0.0077815	0.0369448	-3.27773
7249_at	YFR038W	NA	1.52499	6.09853	4.2916	0.0007441	0.00645613	-0.931548
10019_at	YER066W	NA	-1.52453	7.15818	-1.81465	0.0910391	0.233219	-5.59961
11038_at	YOR329C	SCD5	-1.52404	6.77268	-3.22988	0.00604393	0.0307299	-3.02896
11268_at	YCR047C	BUD23	-1.52358	7.26636	-2.95861	0.0103593	0.0454438	-3.55787
5689_at	YKL128C	PMU1	1.52329	6.19374	3.11833	0.00754537	0.0361265	-3.24746
6434_at	YKR018C	NA	1.52317	9.13632	6.45699	1.49861e-05	0.000403156	3.05832
8197_at	NA	NA	-1.52304	5.73643	-2.24548	0.0413889	0.128361	-4.88219
4170_at	YMR184W	NA	1.52263	5.49892	3.76056	0.00210581	0.0138826	-1.97978
6892_at	YOR133W	EFT1orEFT2	1.52177	7.84769	6.79166	8.67247e-06	0.000266308	3.61977
7755_at	YJL052W	TDH1	-1.52107	7.15955	-2.4281	0.0292353	0.0989167	-4.55591
5999_at	YLR098C	CHA4	-1.51912	7.80732	-4.2594	0.000792005	0.00674578	-0.994696
6940_s_at	NA	NA	-1.51836	4.64972	-2.85534	0.012706	0.0525523	-3.75665
7648_at	YIL036W	CST6	1.51813	8.954	4.40686	0.000595634	0.00553258	-0.706062
4183_at	YGL085W	NA	1.51734	10.5207	4.31861	0.000706207	0.00621929	-0.878625
5240_at	YHR193C	EGD2	-1.51462	7.49559	-2.27486	0.0391558	0.123695	-4.83048
8462_at	YLR115W	CFT2	-1.51278	9.86858	-2.14748	0.0497334	0.146959	-5.05242
6545_at	YHR144C	DCD1	1.51229	7.85669	5.35703	0.000100846	0.00167508	1.10389
10655_at	YER039C	HVG1	1.51211	6.34352	4.7157	0.000330416	0.0036416	-0.107368
8830_at	YDR071C	PAA1	1.51052	9.38039	4.61567	0.000399428	0.00413836	-0.300319
4764_at	YGR182C	NA	1.51027	8.75924	4.16324	0.000954817	0.00770373	-1.18372
6694_at	YDL018C	ERP3	-1.50928	6.85637	-1.89754	0.0785549	0.207854	-5.46825
6702_at	NA	NA	-1.50865	6.07813	-2.42914	0.029177	0.0987553	-4.55402
11369_at	YNL047C	SLM2	-1.50669	6.57424	-3.74176	0.00218562	0.0143177	-2.01706
7962_s_at	YCR051W	NA	1.50665	11.2971	7.09471	5.3543e-06	0.000188613	4.11476
10963_at	NA	NA	1.50603	8.64689	4.45573	0.000542231	0.00515976	-0.610779
4713_at	YLR212C	TUB4	1.50568	7.48968	5.02634	0.000184741	0.00246569	0.485259
4310_at	YJL004C	SYS1	1.50543	11.2168	4.87968	0.000242733	0.00295041	0.20677
7232_at	YKL013C	ARC19	1.50517	9.2204	4.35708	0.000655616	0.00590573	-0.803322
8232_at	YGR043C	NA	-1.50368	8.1783	-2.52128	0.0244273	0.0870671	-4.38544
6403_at	YLR192C	HCR1	1.50356	6.78736	4.7657	0.000300661	0.00342277	-0.0112923
2210_s_at	YKL087C	CYT2	-1.5027	4.04875	-3.19198	0.00651735	0.0324997	-3.10333
6783_at	YML100W	TSL1	1.50233	8.98449	2.08487	0.0558558	0.160484	-5.15916
7572_at	YJL052W	TDH2orTDH1orTDH3	1.50196	4.54193	3.58423	0.00298673	0.0183507	-2.3293
5692_at	YBR107C	IML3	1.50145	6.70443	3.92128	0.00153362	0.0109279	-1.66143
3914_s_at	YPL043W	NOP4	-1.50136	7.0612	-1.95002	0.0714714	0.193499	-5.38331
4955_at	YBR041W	FAT1	1.50074	6.14901	4.67374	0.000357728	0.00384722	-0.188182
8610_at	NA	NA	1.50052	8.23901	5.31066	0.000109684	0.00177145	1.01796
4500_at	YGL143C	MRF1	1.50027	6.09852	3.73031	0.00223571	0.0145438	-2.03976
11179_at	YNL112W	DBP2	1.4995	4.98633	4.56078	0.000443463	0.00447054	-0.40661
7704_at	YGR234W	YHB1	-1.49777	5.65256	-3.25438	0.0057563	0.0297842	-2.98083
6573_at	YDL081C	RPP1A	-1.49652	6.41982	-3.23288	0.00600805	0.0305972	-3.02309
10122_at	YGR206W	NA	-1.49565	10.9952	-4.67032	0.00036006	0.00385654	-0.194793
10278_at	YOR226C	ISU2	-1.49213	8.22176	-2.41433	0.0300188	0.100946	-4.5809
5015_at	YJL223C	PAU4orPAU6orPAU1orPAU2orDAN3	1.49172	5.76647	3.70295	0.00236015	0.015184	-2.09399
10688_at	YJL033W	HCA4	1.49145	7.3655	4.42949	0.000570261	0.00535014	-0.661912
4567_at	NA	NA	1.49136	6.66908	4.23253	0.000834404	0.00697954	-1.04745
4867_at	YJR058C	APS2	1.49091	8.14751	4.49414	0.00050372	0.0048716	-0.536006
9516_at	YLR065C	NA	-1.49086	6.15465	-1.82656	0.0891421	0.229443	-5.58095
9323_at	NA	NA	1.49005	7.25177	4.57419	0.000432266	0.00438793	-0.380625
9009_at	YFL013C	IES1	1.4889	5.41131	3.56297	0.00311551	0.0189715	-2.37141
6521_at	YPR095C	SYT1	-1.48813	7.98151	-1.80769	0.0921632	0.235131	-5.61046
4818_at	YDR253C	MET32	1.48792	9.06851	5.13582	0.000150952	0.00218471	0.691525
6641_at	YLR461W	PAU4orPAU6orPAU1orPAU2orDAN3	1.48709	8.86723	4.75113	0.000309033	0.00348409	-0.03926
9371_at	YHR181W	NA	-1.48623	10.1632	-2.90424	0.0115359	0.0491277	-3.66273
9347_at	YKL115C	PRR1	1.48594	10.2251	2.73774	0.0160155	0.0628526	-3.98074
5170_at	YHR105W	YPT35	1.48475	7.04741	2.64455	0.0192212	0.0720893	-4.15633
8640_at	YJL212C	OPT1	-1.48197	7.46376	-2.29922	0.0373904	0.119493	-4.78736
6837_at	YBR197C	NA	1.48149	9.1712	4.04884	0.0011939	0.00918045	-1.40926
10996_at	YGL229C	SAP4	1.48102	8.9965	2.61578	0.0203306	0.0754019	-4.21013
8885_at	YBL014C	RRN6	1.48088	6.51298	5.25039	0.000122394	0.00189726	0.905847
9065_at	YBL028C	NA	1.47877	5.16535	6.93747	6.866e-06	0.000223635	3.85952
7297_at	YER026C	CHO1	1.47875	7.96742	2.36079	0.0332572	0.108894	-4.67747
5024_at	YPR028W	YOP1	1.47774	6.6438	2.4919	0.0258552	0.0908044	-4.43946
2149_at	YLR136C	TIS11	-1.47728	6.85315	-2.83699	0.0131742	0.0539864	-3.79177
6613_at	YHR039C	MSC7	1.47708	8.80204	4.87781	0.000243582	0.00295688	0.20321
10171_at	YNL194C	NA	1.47696	8.71488	3.15543	0.0070088	0.034291	-3.17492
6134_at	YDL119C	NA	1.47627	7.09625	2.22726	0.0428338	0.131685	-4.91412
6400_at	YJR060W	CBF1	1.47593	9.46923	5.10405	0.000160041	0.00227357	0.631807
8949_at	YGL138C	NA	1.47565	9.98924	3.81284	0.00189911	0.0128186	-1.87617
7161_g_at	YFL038C	YPT1	1.47563	9.28586	7.13059	5.06131e-06	0.00018172	4.17251
7786_at	YHL043W	ECM34	-1.47562	3.71045	-3.42365	0.00410992	0.0233087	-2.64712
9967_at	YMR276W	DSK2	-1.47515	7.70667	-3.20048	0.0064081	0.0321025	-3.08667
6911_at	YKL156W	RPS27A	1.47435	8.92122	3.24019	0.00592121	0.0302895	-3.00872
8285_at	YAL045C	NA	1.47414	9.33855	3.88793	0.00163769	0.011443	-1.72744
8875_at	NA	NA	1.47364	3.3295	4.09786	0.00108474	0.00852423	-1.31254
4116_at	YIL024C	NA	1.47274	6.38406	3.96854	0.00139754	0.0102322	-1.56793
4536_at	YDL012C	NA	1.47272	6.84383	2.8836	0.0120163	0.0505198	-3.70242
5315_at	YML063W	RPS1BorRPS1A	-1.472	6.17621	-2.96051	0.0103203	0.0453579	-3.55419
5136_at	YCR099C	NA	1.47053	4.38074	3.87326	0.00168573	0.0116998	-1.75649
10799_at	YFL030W	AGX1	-1.47	7.16904	-1.78098	0.0965968	0.243843	-5.65193
6684_at	YMR123W	PKR1	1.46989	4.44486	3.2928	0.00533259	0.02814	-2.90526
6123_at	YMR105C	PGM2	1.46925	6.95486	2.95724	0.0103875	0.0454817	-3.56052
9068_at	YIL083C	NA	1.46843	8.70136	4.30634	0.000723172	0.00631423	-0.902664
10323_at	YER093C-A	NA	1.4677	8.96548	6.77808	8.86447e-06	0.000269243	3.5973
5322_at	YDR540C	NA	1.46722	6.57613	3.39408	0.00435903	0.0243516	-2.70554
7831_at	YLR315W	NKP2	-1.46675	3.31443	-3.00705	0.00941095	0.0424813	-3.46407
9975_at	YBL021C	HAP3	1.46666	9.15352	4.50171	0.000496475	0.0048231	-0.521297
10415_at	YEL066W	HPA3	-1.46658	4.98061	-3.87237	0.00168867	0.0117115	-1.75825
11254_at	YOR081C	NA	1.46646	6.32211	4.31966	0.000704775	0.00621254	-0.87657
4285_at	YER093C-A	NA	-1.46611	6.97736	-3.03672	0.00887315	0.0406033	-3.40648
4062_at	YOR171C	LCB4	1.46544	8.50635	3.04336	0.00875686	0.0402415	-3.39356
8187_at	YHR138C	NA	1.46526	6.98935	4.65791	0.000368631	0.00389273	-0.218724
4470_at	YOR065W	CYT1	1.46522	9.0124	2.99717	0.00959723	0.0430646	-3.48323
3665_f_at	YOR219C	STE13	-1.4647	8.50959	-3.79519	0.00196649	0.0131876	-1.91115
6672_s_at	YDR175C	RSM24	1.46453	7.65958	4.88075	0.000242248	0.00295041	0.208811
6461_at	NA	NA	1.46422	8.79765	5.25253	0.000121916	0.00189365	0.90985
4187_at	YML091C	RPM2	1.46297	7.3413	3.50795	0.00347548	0.020573	-2.48037
6095_at	YKL107W	NA	1.46285	9.79687	4.08611	0.00110992	0.00867041	-1.33569
11307_s_at	YLR156W	NA	1.46243	6.05822	3.92384	0.00152592	0.0108902	-1.65636
8829_at	NA	NA	1.4623	7.4419	3.63813	0.00268374	0.0169275	-2.22249
4095_at	YMR069W	NAT4	1.46228	7.59825	2.54431	0.0233614	0.0840433	-4.34293
4394_at	YKL186C	MTR2	1.46198	10.9106	4.77731	0.000294156	0.00336926	0.0109827
6525_at	YIR011C	STS1	1.46193	8.52252	4.64064	0.000380914	0.00400431	-0.252061
9124_at	YML099C	ARG81	-1.4617	5.57959	-2.65348	0.0188888	0.0712145	-4.13958
11002_at	YGL210W	YPT32	1.46061	9.15569	4.26795	0.00077899	0.00664636	-0.977928
4873_at	YLR316C	TAD3	-1.4606	11.8799	-2.93104	0.0109405	0.0471076	-3.61111
4354_at	YLL064C	PAU4orPAU6orPAU1orPAU2orDAN3	1.46056	10.0963	3.19805	0.00643911	0.0321783	-3.09143
6910_at	YDR137W	RGP1	1.45953	11.4072	4.94558	0.00021464	0.0027071	0.332197
5611_at	YLL041C	SDH2	1.45946	6.77614	4.00782	0.00129383	0.00975601	-1.49028
6863_at	YEL011W	GLC3	1.45896	5.06835	3.10483	0.00775052	0.0368664	-3.27382
7221_at	YIL010W	DOT5	1.4588	9.96278	2.46821	0.0270641	0.0937452	-4.48284
6844_at	YJL200C	NA	1.45696	4.99607	2.7667	0.0151299	0.0602035	-3.9258
5337_at	NA	NA	-1.45678	5.85676	-2.8854	0.0119738	0.0503792	-3.69897
3732_s_at	YCL065W	MATALPHA1orHMLALPHA1	-1.45665	8.56192	-3.48798	0.00361629	0.0211252	-2.51991
10648_at	YBR067C	TIP1	1.45662	9.97919	4.70169	0.000339289	0.00370632	-0.134336
6099_at	YOL060C	MAM3	1.45614	7.01995	1.564	0.140116	0.32553	-5.97361
4902_at	YLR241W	NA	1.45567	9.06817	5.24162	0.000124367	0.00190635	0.889497
7112_at	YIL094C	LYS12	1.45544	10.5991	2.88577	0.0119649	0.0503792	-3.69825
6495_at	YMR075W	NA	1.45394	7.49162	3.50484	0.00349703	0.0206743	-2.48653
10326_g_at	YBR160W	CDC28	1.45386	6.08264	4.1087	0.00106201	0.00838734	-1.29116
8998_at	YIR035C	NA	1.45323	7.21821	2.55858	0.0227233	0.0824414	-4.31651
7603_at	YER017C	AFG3	-1.45213	6.28573	-2.46986	0.0269781	0.0936557	-4.47982
6023_at	YFL020C	PAU5orPAU7	-1.4515	8.7778	-3.14428	0.00716597	0.0348227	-3.19674
7169_at	YOR094W	ARF3	1.45104	9.25705	3.7393	0.00219627	0.0143573	-2.02193
4434_at	YPL029W	SUV3	1.45057	5.32676	3.9246	0.00152363	0.0108854	-1.65485
4108_at	YPR098C	NA	1.45025	4.41179	3.54666	0.00321814	0.0194174	-2.40373
4519_at	YAL037W	NA	1.45002	7.96244	3.36578	0.00461155	0.025308	-2.7614
5969_at	YPL079W	RPL21BorRPL21A	1.44985	6.93317	2.57036	0.0222095	0.0810816	-4.29468
8225_at	YLR296W	NA	-1.44934	6.26448	-2.90063	0.0116187	0.0493464	-3.66968
4571_at	NA	NA	1.4483	5.77072	4.00026	0.00131315	0.0098698	-1.50521
9110_at	YGR251W	NA	-1.44781	5.41317	-2.70744	0.016996	0.0659975	-4.03803
4352_at	NA	NA	1.44773	5.70435	3.36731	0.00459753	0.0252607	-2.75838
6914_at	NA	NA	1.44677	8.31688	4.87458	0.000245062	0.00296417	0.197038
4163_at	YFR050C	PRE4	1.4466	4.72363	3.67304	0.00250425	0.015979	-2.15329
6044_at	YLR025W	SNF7	1.44554	6.19117	4.58259	0.0004254	0.00434951	-0.364354
5812_at	YDL181W	INH1	1.44442	8.16938	3.8304	0.00183442	0.0125178	-1.84139
4809_at	YDL111C	RRP42	-1.44353	5.39962	-4.13239	0.00101402	0.00808355	-1.24448
9085_at	NA	NA	1.44288	3.63626	4.8218	0.000270544	0.00318478	0.0962193
4366_at	YOR216C	RUD3	-1.44191	6.85662	-2.95382	0.010458	0.0457018	-3.56712
9637_at	YLR074C	BUD20	-1.44178	5.97765	-3.19457	0.00648393	0.0323849	-3.09827
10487_at	YBR146W	MRPS9	1.44145	5.90664	4.99634	0.000195308	0.00254282	0.428492
6395_at	YDR108W	GSG1	1.4414	5.67381	3.39637	0.0043392	0.024309	-2.70102
4447_at	YOR093C	NA	1.44138	4.36589	2.42224	0.0295662	0.0998221	-4.56655
5259_at	YLR326W	NA	1.44073	5.82831	6.22216	2.21998e-05	0.000539674	2.65503
9436_at	YDR504C	SPG3	1.44059	9.62924	3.79848	0.00195374	0.0131116	-1.90463
4999_at	YDL082W	RPL13BorRPL13A	1.4392	4.24955	4.3258	0.000696456	0.00617418	-0.864542
9072_at	YJR030C	NA	1.43806	6.72539	3.34308	0.00482475	0.0261247	-2.80619
7189_at	NA	NA	1.43752	4.04002	3.76157	0.00210162	0.0138647	-1.97779
7814_at	YOR360C	PDE2	1.43668	9.77189	4.24426	0.000815629	0.00688417	-1.02443
9106_at	YJR043C	POL32	-1.43628	7.01493	-1.55096	0.143197	0.331124	-5.99203
8279_at	YKL094W	YJU3	1.43483	6.6278	5.69661	5.49939e-05	0.0010816	1.72476
7225_at	NA	NA	1.43375	6.46966	3.53314	0.00330578	0.0197944	-2.43051
6242_at	YLR440C	SEC39	1.43345	8.24148	3.83338	0.00182364	0.0124634	-1.83547
5675_at	YJL225C	YRF1-5orYRF1-7orYRF1-6orYRF1-3orYRF1-2orYRF1-1	-1.43306	6.47613	-5.26791	0.000118548	0.00186619	0.938488
6355_at	YGL257C	MNT2	1.43259	7.2592	2.02557	0.0622907	0.174794	-5.25874
6019_at	YLL056C	NA	1.43238	9.20463	5.08414	0.000166022	0.0023074	0.594335
5546_at	YBR035C	PDX3	1.43208	8.95436	4.70141	0.000339465	0.00370632	-0.134864
4382_at	YDR437W	NA	1.4318	8.19233	4.75353	0.000307635	0.00348093	-0.0346411
4958_at	YHR191C	CTF8	1.43057	10.1841	4.95096	0.000212501	0.00269443	0.342417
5694_at	NA	NA	1.43013	7.62754	4.09058	0.00110027	0.00860939	-1.32688
4575_i_at	YGR235C	NA	1.43006	7.22901	2.49325	0.0257876	0.0907036	-4.43698
4654_at	NA	NA	-1.42964	4.08829	-2.41597	0.0299241	0.100736	-4.57792
5379_at	YGR231C	PHB2	-1.42888	5.03873	-2.46018	0.0274861	0.0947388	-4.49751
10695_at	YGL037C	PNC1	1.42849	5.10362	4.57366	0.000432699	0.00438793	-0.381642
4932_at	YGL191W	COX13	1.42757	6.85826	3.23669	0.0059626	0.0304182	-3.01559
6935_at	YDR028C	REG1	1.42647	8.88379	5.39443	9.42597e-05	0.00160388	1.17299
9938_at	NA	NA	-1.42611	7.25165	-1.97685	0.068079	0.186697	-5.33938
7094_at	NA	NA	1.42602	8.74118	2.87445	0.0122355	0.0512648	-3.71999
6417_at	YGR013W	SNU71	-1.42601	9.30156	-4.93174	0.000220245	0.00275602	0.305905
6541_at	YJL075C	NA	1.42517	9.7678	4.29009	0.000746282	0.00646847	-0.934512
8678_at	NA	NA	1.42506	7.50906	3.23516	0.00598086	0.0304923	-3.01861
5119_at	YKR051W	NA	1.42382	6.57968	3.34401	0.00481578	0.0261065	-2.80435
10901_at	YBR298C	MAL31	1.42272	6.02704	4.07688	0.00113016	0.00879168	-1.35392
4584_at	NA	NA	-1.42241	5.33165	-3.6172	0.00279754	0.0173773	-2.26397
6476_at	YNR060W	FRE4	1.4224	6.70916	3.84866	0.00176949	0.0121958	-1.80521
2689_s_at	YDR390C	UBA2	-1.42179	7.93326	-2.69568	0.0173922	0.0669235	-4.06022
10771_at	NA	NA	1.4217	11.5199	6.93587	6.8835e-06	0.000223635	3.85691
5058_at	YMR194W	RPL36AorRPL36B	-1.42169	5.86994	-2.59735	0.0210737	0.0774806	-4.2445
9607_at	YBL080C	PET112	-1.42076	4.47509	-2.37763	0.0322041	0.106718	-4.64718
6474_at	YOL117W	RRI2	1.42056	5.87471	3.93715	0.00148646	0.0106987	-1.63001
9033_at	YBR164C	ARL1	1.42027	5.3441	3.0016	0.00951338	0.0427736	-3.47465
10896_at	YBL084C	CDC27	1.41876	9.72038	5.76868	4.84518e-05	0.000981495	1.85455
10297_at	YPR155C	NCA2	1.41865	7.97384	3.99432	0.00132857	0.00992092	-1.51696
10691_at	YNL268W	LYP1	1.41852	8.67413	4.23888	0.000824191	0.0069256	-1.035
6109_at	YIL101C	XBP1	1.41825	6.17108	3.50363	0.00350544	0.020711	-2.48892
10554_at	YBR152W	SPP381	1.41752	5.80858	2.67148	0.0182359	0.0693139	-4.10579
11125_at	YLR229C	CDC42	1.41555	6.33728	4.95298	0.000211702	0.00268876	0.346256
9544_at	YIL091C	NA	-1.41468	8.089	-1.93773	0.0730768	0.196875	-5.40333
10985_at	YJR034W	PET191	1.41401	6.80392	2.64466	0.0192168	0.0720893	-4.15611
4854_at	NA	NA	1.41384	4.78546	3.37772	0.00450324	0.0249482	-2.73783
5707_at	YHR126C	NA	1.41379	7.54299	4.39809	0.000605781	0.00559213	-0.723189
6402_at	YER098W	UBP9	1.41147	9.00879	3.38293	0.00445681	0.024735	-2.72755
11382_at	YDR154C	CPR1	-1.40981	4.91401	-4.82096	0.000270975	0.00318584	0.0945971
11397_f_at	YIL177C	YRF1-5orYRF1-7orYRF1-6orYRF1-3orYRF1-2orYRF1-1	-1.40887	5.90482	-5.19016	0.00013663	0.0020407	0.793382
6710_at	YPR183W	DPM1	1.40836	6.83998	4.70483	0.00033728	0.00370413	-0.128292
11141_at	YMR294W	JNM1	-1.4082	5.70744	-2.11499	0.0528285	0.153607	-5.10801
6444_at	YPR043W	RPL43A	1.40752	7.96397	2.07612	0.0567659	0.162649	-5.17396
9671_at	YGR219W	NA	1.40703	4.72171	3.56873	0.00308009	0.0188172	-2.36001
4104_at	YLR303W	MET17	1.40685	7.74701	3.21988	0.00616549	0.0311444	-3.04861
4220_at	YKR100C	SKG1	1.40602	4.64583	3.04389	0.00874771	0.0402415	-3.39253
9403_at	YML058C-A	NA	-1.40595	6.59787	-2.43075	0.0290869	0.0986213	-4.5511
6691_at	YKL138C	MRPL31	1.40552	5.80807	3.12688	0.00741821	0.0357691	-3.23076
9082_at	YKL135C	APL2	-1.40495	8.8467	-2.0209	0.0628257	0.175806	-5.26652
11102_at	YMR181C	NA	1.40441	11.7429	4.11228	0.0010546	0.00834292	-1.28409
4581_at	YPL032C	SVL3	1.40432	11.1244	4.24801	0.000809704	0.00684654	-1.01706
9205_at	YIR036C	NA	-1.40389	7.88259	-1.66856	0.117386	0.283811	-5.82206
7406_at	NA	NA	1.403	8.69549	4.50166	0.000496518	0.0048231	-0.521386
6926_at	YGL031C	RPL24A	1.4029	6.49798	3.55993	0.00313438	0.0190693	-2.37743
10485_at	YGR075C	PRP38	1.40278	8.11303	3.41417	0.00418815	0.0236948	-2.66585
5354_at	YDR041W	RSM10	1.40218	7.08648	3.81351	0.0018966	0.0128186	-1.87485
4431_at	YDR213W	UPC2	1.40159	6.96706	2.9011	0.011608	0.0493444	-3.66879
11393_at	YLR064W	NA	1.40054	6.42234	3.6642	0.00254852	0.0162171	-2.17081
5256_at	YPR182W	SMX3	-1.40032	6.17159	-2.38762	0.0315946	0.105034	-4.62918
8415_at	YDL087C	LUC7	1.39991	7.14586	3.57778	0.00302524	0.018555	-2.34209
11320_at	YLR439W	MRPL4	1.39967	9.8554	4.62566	0.000391914	0.00407861	-0.281009
10952_at	NA	NA	1.39962	6.38881	4.39921	0.000604471	0.00559213	-0.720995
8030_at	YPL067C	NA	-1.3994	9.2936	-2.04656	0.0599385	0.169666	-5.22366
4994_at	YGR053C	NA	1.39899	6.64895	3.63173	0.00271802	0.0170659	-2.23517
7579_at	YKL086W	SRX1	-1.3985	5.40281	-2.59287	0.0212582	0.0780358	-4.25284
6422_at	YEL023C	NA	-1.39844	8.48909	-3.5973	0.0029102	0.0179714	-2.3034
3189_i_at	YPL182C	NA	1.39811	9.43338	1.22476	0.240855	0.479834	-6.41506
7138_at	YNL061W	NOP2	1.39599	6.65747	4.02643	0.00124747	0.00950621	-1.4535
5238_at	YIL053W	RHR2	1.39569	4.95382	3.13236	0.00733779	0.0354546	-3.22004
8517_at	YMR009W	NA	1.39485	6.98315	3.88987	0.00163144	0.0114229	-1.72359
7454_s_at	YGR154C	NA	1.39375	7.47872	5.58537	6.6962e-05	0.0012452	1.52304
4544_at	NA	NA	1.39354	4.30568	3.42528	0.00409661	0.0232521	-2.6439
10931_at	YOR299W	BUD7	1.39344	6.08462	4.80681	0.000278275	0.00324306	0.0675158
8176_at	YLR112W	NA	-1.39219	7.82689	-2.82101	0.0135958	0.0553257	-3.82232
9007_at	YPL060W	LPE10	-1.39165	9.20777	-2.46026	0.027482	0.0947388	-4.49737
3188_at	YDL153C	SAS10	1.39017	7.94998	1.7692	0.0986109	0.247212	-5.67009
2138_at	YHR100C	NA	-1.38946	3.43595	-2.82556	0.0134746	0.054952	-3.81364
9206_at	YDR458C	NA	-1.38934	7.46169	-2.11186	0.0531357	0.154332	-5.11334
10747_at	YOR012W	NA	1.38921	9.55875	6.50862	1.37596e-05	0.000375572	3.14597
3741_f_at	YCR059C	YIH1	-1.38906	6.75778	-3.79027	0.00198569	0.0132497	-1.9209
6575_at	YDR377W	ATP17	1.38758	5.57118	3.39616	0.00434098	0.024309	-2.70143
4541_at	YGR131W	NA	1.38741	7.49088	4.04017	0.00121435	0.00931465	-1.42638
6416_at	YKR048C	NAP1	1.38738	10.4459	5.12056	0.000155248	0.00223404	0.662861
10538_at	YFR013W	IOC3	-1.38716	4.95022	-2.65992	0.0186525	0.0705229	-4.12749
7611_at	YGL018C	JAC1	-1.38702	7.52039	-3.15879	0.00696217	0.0341164	-3.16835
6487_at	YPL171C	OYE3	1.38647	8.02977	0.929656	0.368288	0.639504	-6.72722
8276_at	YLR008C	PAM18	1.38633	5.82796	3.28408	0.00542591	0.028584	-2.92241
6567_at	YGL145W	TIP20	1.38622	8.89308	6.65156	1.08837e-05	0.000314548	3.38665
6172_at	YML002W	NA	1.38598	7.31626	4.62298	0.000393914	0.00409001	-0.286186
6025_at	YOL013C	HRD1	1.38575	9.0011	5.15434	0.000145904	0.00213481	0.726277
5701_at	NA	NA	1.38574	8.23912	3.43049	0.00405437	0.0230919	-2.6336
10260_at	YML031W	NDC1	1.38557	5.90244	3.5333	0.0033047	0.0197944	-2.43018
6536_at	YGL254W	FZF1	-1.38537	7.81132	-2.9209	0.0111622	0.0479298	-3.63066
6475_at	YFR047C	BNA6	-1.38527	5.99335	-3.24948	0.00581279	0.0299796	-2.99047
9956_at	YFL014W	HSP12	1.38505	5.50584	4.8474	0.000257861	0.00308211	0.145147
5044_at	YDR007W	TRP1	1.38489	6.83195	4.17373	0.000935493	0.00758716	-1.16306
8836_at	YOR143C	THI80	-1.38431	8.36323	-2.55422	0.0229163	0.0829161	-4.32459
8869_at	YIL092W	NA	1.38218	8.94165	2.10395	0.05392	0.156086	-5.1268
6707_at	YBR122C	MRPL36	1.38216	7.10658	3.54442	0.0032325	0.0194774	-2.40817
10949_at	YHR084W	STE12	1.38213	8.32657	2.33366	0.0350216	0.113477	-4.72603
6302_at	YOR357C	GRD19	1.38172	5.90066	3.25585	0.00573955	0.0297164	-2.97795
7583_at	YKL159C	RCN1	-1.38142	6.08183	-3.02952	0.00900077	0.0410666	-3.42046
8363_at	YGL187C	COX4	-1.37955	6.36058	-2.07867	0.0564992	0.162128	-5.16965
10108_at	YNR076W	PAU4orPAU6orPAU1orPAU2orDAN3	1.37948	10.0748	5.3285	0.000106192	0.00173007	1.05105
10476_at	YBL100C	NA	-1.37909	4.97607	-1.25876	0.228685	0.463076	-6.37458
4401_at	YJR102C	VPS25	1.3787	7.39296	1.53284	0.147579	0.338738	-6.01746
10696_at	YKR007W	MEH1	1.37854	9.91643	6.84322	7.98227e-06	0.000248546	3.7049
6902_at	YKL187C	NA	-1.37843	10.3536	-1.99647	0.0656908	0.181911	-5.30703
4148_at	YOL105C	WSC3	-1.37822	5.69627	-3.7748	0.00204734	0.0135931	-1.95156
9035_at	YLR152C	NA	1.37772	4.32065	2.19162	0.0457978	0.138089	-4.97621
10993_at	YBL048W	NA	1.37729	10.8969	3.57321	0.0030528	0.0186857	-2.35113
6374_at	NA	NA	1.37681	5.2229	3.27976	0.00547284	0.0287663	-2.93093
7569_at	YNL050C	NA	-1.37631	5.33223	-2.97318	0.0100645	0.0445695	-3.52969
7977_at	YLR066W	SPC3	1.37623	6.0397	3.39229	0.00437459	0.0244093	-2.70908
5359_at	YDR067C	NA	1.3758	5.21691	3.74462	0.00217326	0.0142568	-2.01138
9682_at	YOL163W	NA	1.37403	6.96822	4.91486	0.00022729	0.002814	0.273793
5387_at	YOR299W	BUD7	1.37291	5.78746	5.10216	0.000160597	0.00227493	0.628259
9004_at	YNL157W	NA	-1.37255	6.76944	-1.87257	0.0821432	0.215698	-5.50819
4986_at	YOL159C	NA	-1.37223	10.1665	-3.38806	0.00441155	0.0245276	-2.71743
4532_at	YDR152W	GIR2	1.37193	8.28263	3.54131	0.00325252	0.0195633	-2.41432
2678_at	YPR014C	NA	-1.37193	3.12471	-4.71103	0.000333349	0.00366526	-0.11636
4912_at	YOR229W	WTM2	1.37166	7.04003	3.81171	0.00190336	0.012838	-1.87841
10348_at	NA	NA	-1.37156	7.74542	-2.66654	0.0184128	0.0698429	-4.11506
4505_at	NA	NA	-1.37154	5.71125	-4.34404	0.000672341	0.00602911	-0.828845
5917_at	YHL046C	PAU4orPAU6orPAU1orPAU2orDAN3	1.37148	9.40162	4.28198	0.000758095	0.00652623	-0.950411
5914_at	YDR102C	NA	1.37045	8.43816	4.19225	0.00090237	0.00738267	-1.12663
9309_at	YGR264C	MES1	1.37016	8.97199	3.34929	0.00476543	0.0259087	-2.79393
6391_at	YHR034C	PIH1	1.36978	6.45361	4.17964	0.000924791	0.00751997	-1.15143
4720_at	YDR287W	NA	-1.36967	6.5741	-4.71858	0.000328619	0.00363507	-0.101816
6561_at	YNL314W	DAL82	1.36948	5.0658	4.79029	0.000287056	0.00330823	0.0358691
2496_g_at	YOR013W	NA	-1.36939	4.20299	-3.6278	0.00273928	0.0171389	-2.24296
8686_at	YKL208W	CBT1	-1.36884	6.46055	-4.03367	0.0012299	0.00939533	-1.4392
10386_s_at	YIR020C	NA	1.36878	5.05621	3.88999	0.00163106	0.0114229	-1.72336
10716_at	YGL205W	POX1	-1.36854	8.33524	-1.80313	0.0929077	0.236771	-5.61758
4329_at	YLR155C	ASP3-4orASP3-3orASP3-2orASP3-1	-1.36835	6.19757	-4.01542	0.00127471	0.00965075	-1.47527
11202_at	YLR209C	PNP1	1.368	4.35608	3.72253	0.00227039	0.0147488	-2.05517
5632_at	YGR226C	NA	1.3678	6.80476	1.64491	0.122226	0.292935	-5.85692
5109_at	NA	NA	1.36602	6.90836	3.89424	0.00161745	0.0113868	-1.71494
4523_at	YLR259C	HSP60	1.36535	5.21715	2.81803	0.0136759	0.0555304	-3.82801
4368_at	YKL167C	MRP49	1.36493	5.28976	3.06846	0.00833124	0.0388861	-3.34472
6215_at	YJL072C	PSF2	1.36476	6.63094	4.1257	0.00102734	0.00815493	-1.25766
5333_at	YDR542W	PAU4orPAU6orPAU1orPAU2orDAN3	1.36441	7.12903	1.83275	0.088171	0.227481	-5.57123
7971_at	YHR162W	NA	1.36429	5.52499	3.54166	0.00325027	0.0195624	-2.41363
8723_at	YGL149W	NA	-1.36324	10.0191	-2.9829	0.00987251	0.0439275	-3.51087
5700_at	YGL118C	NA	1.36237	9.29033	4.69338	0.000344664	0.00375743	-0.150329
9024_at	YLR216C	CPR6	-1.36165	5.34685	-3.55499	0.00316532	0.0191996	-2.38723
4489_at	YNL140C	RLR1	-1.36148	4.85108	-5.18056	0.000139055	0.002067	0.775402
10529_i_at	YMR322C	SNO4orHSP32orHSP33	1.36088	9.96661	3.52395	0.00336669	0.020069	-2.4487
7612_at	YHL018W	NA	-1.3607	8.05517	-4.45377	0.00054427	0.00516375	-0.614587
5816_at	YDR281C	PHM6	1.36061	6.26686	2.89681	0.0117068	0.0496967	-3.67704
4577_at	YHR101C	BIG1	1.35874	6.80824	4.52206	0.000477516	0.00472204	-0.481761
8476_at	YHL048W	COS8	1.35816	6.93219	4.5406	0.000460883	0.00458183	-0.445752
6932_at	YGR135W	PRE9	1.35813	8.87593	3.1126	0.00763178	0.0364599	-3.25865
10142_at	YPR055W	SEC8	1.35762	5.45269	3.81302	0.00189844	0.0128186	-1.87582
7375_at	YOR335C	ALA1	1.35736	6.742	5.71342	5.33893e-05	0.00106137	1.7551
9475_at	YDR157W	RPA14	-1.35667	7.75977	-3.12627	0.00742725	0.0357942	-3.23196
5718_at	YDR189W	SLY1	1.35657	7.58495	2.88668	0.0119434	0.0503575	-3.6965
10883_at	YLR172C	DPH5	1.35656	5.49317	5.31995	0.000107852	0.00175401	1.03518
7842_at	YKR045C	NA	-1.35543	8.34737	-1.97587	0.0681998	0.186898	-5.34099
7775_at	YHL040C	ARN1	-1.35487	7.90111	-1.8912	0.0794528	0.209873	-5.47843
3395_f_at	YIL062C	ARC15	-1.35426	5.73119	-4.12082	0.00103716	0.00822587	-1.26726
7212_at	YNL272C	SEC2	1.35405	5.68683	3.26118	0.00567901	0.0294683	-2.96747
11073_at	YGR116W	SPT6	-1.35395	3.46011	-1.62404	0.126641	0.301164	-5.88741
6222_at	YBR053C	NA	1.35381	6.90783	7.02146	6.00948e-06	0.000206245	3.99628
4862_at	YGR026W	NA	1.35302	5.83279	2.55258	0.0229895	0.0830843	-4.32763
6812_at	YLR438W	CAR2	1.35301	5.23837	4.07151	0.00114208	0.00886225	-1.3645
7788_at	YGR294W	PAU4orPAU6orPAU1orPAU2orDAN3	1.3524	10.3216	5.80011	4.58578e-05	0.000951295	1.91095
9681_at	YDR434W	GPI17	-1.35219	4.94007	-2.19562	0.0454552	0.137455	-4.96925
4960_at	YAL003W	EFB1	1.35175	6.75718	3.94383	0.00146708	0.0106005	-1.6168
4908_at	YLR168C	NA	1.35107	8.18016	3.97482	0.00138041	0.0101386	-1.55551
2924_g_at	YKR034W	DAL80	-1.35079	3.74264	-1.78191	0.0964387	0.243641	-5.65049
4724_i_at	YMR119W	ASI1	1.35035	6.35979	2.94677	0.0106051	0.0460649	-3.58075
9365_at	YOR086C	TCB1	1.3502	6.62801	4.26781	0.000779204	0.00664636	-0.978207
9398_at	NA	NA	-1.34938	6.61206	-2.86032	0.0125817	0.0521539	-3.74711
6898_at	YDR354W	TRP4	1.34938	6.61928	3.18748	0.00657604	0.0327299	-3.11217
7779_at	YJR112W	NNF1	-1.34889	7.82431	-1.43726	0.172597	0.380178	-6.14795
5393_at	YDL135C	RDI1	1.34842	4.32016	2.47145	0.0268956	0.0934042	-4.47692
4974_at	YBR106W	PHO88	1.34801	7.97345	4.30592	0.000723753	0.00631423	-0.903477
11199_at	YGR129W	SYF2	-1.34795	11.0713	-2.8529	0.0127672	0.0526886	-3.76132
8409_at	YOL152W	FRE7	-1.34709	7.20386	-1.29243	0.217115	0.447895	-6.33361
10569_at	YGR283C	NA	1.34592	5.91735	3.4828	0.0036537	0.0212242	-2.53015
5432_at	YJR150C	DAN1	1.34499	6.30689	2.2727	0.0393159	0.123991	-4.83429
4970_at	NA	NA	-1.34469	6.22808	-4.8262	0.000268322	0.00316392	0.104624
7239_at	YBL050W	SEC17	1.34439	11.1406	3.62202	0.00277087	0.0172902	-2.25441
4743_at	YJL132W	NA	1.34378	6.72835	3.45483	0.00386272	0.0221218	-2.58548
10129_at	YDL247W	MPH2	1.34269	8.49478	3.28757	0.00538838	0.0284184	-2.91555
11160_at	YOR160W	MTR10	1.34243	4.08629	2.23926	0.0418772	0.129359	-4.89311
9685_at	YGL260W	NA	1.34183	7.51649	4.91136	0.000228783	0.00282498	0.26712
6194_at	YER042W	MXR1	1.34152	8.11888	2.88085	0.0120817	0.0507345	-3.7077
4856_at	YKL096W	CWP1	1.34089	9.97717	3.83548	0.00181612	0.0124384	-1.83133
5570_at	YFL011W	HXT10	1.34077	7.99064	3.83308	0.00182473	0.0124634	-1.83607
6294_at	YHR148W	IMP3	1.34064	7.19552	3.55973	0.00313566	0.0190693	-2.37784
6463_at	YJL048C	UBX6	1.34056	4.02508	4.14107	0.000996984	0.00798871	-1.22737
10301_at	YIR010W	DSN1	1.3398	9.95868	3.14022	0.0072241	0.035014	-3.20469
5301_at	YDR332W	NA	1.33943	9.24769	3.70841	0.00233478	0.0150415	-2.08317
8464_at	YJR005W	APL1	1.33906	7.2629	2.84423	0.0129876	0.053386	-3.77793
9606_at	YDL206W	NA	-1.33877	9.55235	-4.5734	0.000432917	0.00438793	-0.382155
3421_f_at	NA	NA	-1.33722	5.26104	-3.96732	0.0014009	0.0102343	-1.57034
3284_f_at	YER070W	RNR1	-1.33672	6.84278	-3.69971	0.00237535	0.0152503	-2.10041
5146_at	YML012W	ERV25	1.33668	8.379	4.04451	0.00120407	0.00924343	-1.41781
7203_at	YDR001C	NTH1	1.33638	5.09698	2.62558	0.0199459	0.0742701	-4.19182
10852_at	YGR290W	NA	1.33616	8.17206	2.39063	0.0314134	0.104543	-4.62376
10881_at	YGR238C	KEL2	1.33615	7.47233	2.45881	0.0275588	0.0948253	-4.50001
4709_at	YGL185C	NA	1.33424	9.33777	4.74886	0.000310358	0.00349481	-0.0436164
6724_at	YGR056W	RSC1	1.33413	7.6667	5.42662	8.89481e-05	0.00153198	1.23235
4751_at	YGL165C	NA	1.33404	8.09369	3.20305	0.00637545	0.03198	-3.08163
4740_at	YIL118W	RHO3	-1.33404	9.32315	-3.12065	0.00751066	0.0360328	-3.24293
5992_at	YOR233W	KIN4	1.33385	6.81196	3.32707	0.00498092	0.0267488	-2.83774
6534_at	YLL027W	ISA1	1.33342	5.43216	3.96663	0.00140279	0.010235	-1.5717
5071_at	YGL258W	NA	1.33316	4.3853	3.38568	0.00443252	0.0246295	-2.72213
7178_at	YPL219W	PCL8	1.33306	9.5828	5.24683	0.000123191	0.00189767	0.89921
10858_s_at	YFR052W	RPN12	1.33258	11.1588	4.12688	0.00102496	0.00814992	-1.25532
10894_at	YKL157W	APE2	1.33243	7.4074	3.19912	0.00642546	0.0321416	-3.08934
6537_f_at	YGL107C	RMD9	1.33209	4.87433	5.09308	0.000163309	0.00228902	0.611161
10775_at	NA	NA	-1.33196	4.66872	-1.60753	0.130229	0.307813	-5.91133
6852_at	YPL068C	NA	1.33188	8.31594	3.99315	0.0013316	0.00992092	-1.51926
5735_at	YJR157W	NA	-1.33086	7.91776	-3.18429	0.00661783	0.0328429	-3.11841
10018_at	YCR077C	PAT1	1.33072	9.42193	3.72036	0.00228016	0.0147907	-2.05947
10133_at	YGR253C	PUP2	1.33045	9.96139	4.62805	0.000390139	0.0040728	-0.276394
10234_at	YDR140W	NA	-1.33006	9.23509	-2.3066	0.0368701	0.118113	-4.77424
6705_at	NA	NA	1.32935	6.83513	2.93864	0.0107771	0.046576	-3.59644
8423_at	YLR051C	NA	1.32904	6.70204	3.51249	0.00344425	0.020427	-2.47138
9550_at	YKL224C	PAU3	-1.32847	7.12078	-2.12465	0.0518899	0.151704	-5.09153
5099_at	YJR067C	YAE1	1.32842	4.78821	2.67625	0.0180664	0.0687523	-4.09681
10668_at	YBR163W	DEM1	-1.3284	6.35989	-2.45895	0.0275515	0.0948253	-4.49976
4884_i_at	YKL152C	GPM1	-1.3282	8.06846	-2.7287	0.0163023	0.0638346	-3.99786
2945_s_at	YAR044W	SWH1	-1.32786	3.41905	-1.79028	0.0950321	0.241001	-5.63754
5346_at	YIL009C-A	EST3	1.32767	7.4479	2.03931	0.0607415	0.171358	-5.2358
10247_at	YKL177W	NA	-1.32742	7.49423	-1.81469	0.0910321	0.233219	-5.59954
2336_at	YIR022W	SEC11	-1.32619	3.82141	-4.68718	0.000348734	0.00378099	-0.162274
10790_at	YNL282W	POP3	-1.32566	8.3625	-2.49801	0.0255514	0.0900934	-4.42823
6310_at	YHR049C-A	NA	-1.32539	8.65015	-2.20868	0.0443558	0.134961	-4.94655
8511_at	YDR231C	COX20	-1.32451	7.16546	-2.66005	0.0186478	0.0705229	-4.12725
10039_s_at	YDR034C	LYS14	1.32377	7.80136	3.27495	0.00552543	0.0289196	-2.94038
4837_at	NA	NA	1.3236	7.42376	3.39058	0.00438946	0.0244339	-2.71245
9978_at	YNL278W	CAF120	1.32355	7.44699	3.89812	0.00160516	0.0113259	-1.70727
6530_at	YPR003C	NA	1.32348	9.30792	5.71755	5.30025e-05	0.00105722	1.76255
5175_at	YDR466W	PKH3	-1.32346	4.81649	-2.88532	0.0119755	0.0503792	-3.69911
4071_at	YPL190C	NAB3	1.32317	9.73424	3.6429	0.00265848	0.0168023	-2.21304
3049_at	YJL124C	LSM1	-1.32297	5.05133	-1.95081	0.0713697	0.193336	-5.38203
8865_at	YDR286C	NA	1.3229	6.34012	2.43494	0.0288539	0.0981542	-4.54349
6380_at	YAL003W	EFB1	1.32214	4.85269	4.12571	0.00102732	0.00815493	-1.25764
11415_f_at	YOR277C	NA	-1.32175	3.04939	-2.72662	0.0163687	0.064046	-4.00178
4387_at	YBR033W	NA	1.32154	6.54878	3.17569	0.00673206	0.0333371	-3.13526
3542_f_at	YOR236W	DFR1	-1.32151	10.918	-5.11146	0.00015787	0.00224996	0.64575
6069_i_at	YLR178C	TFS1	1.32117	4.52722	2.9169	0.0112508	0.0481552	-3.63836
3915_s_at	YFL067W	NA	-1.32107	8.65692	-1.46262	0.165637	0.368763	-6.11393
9633_at	YHR025W	THR1	-1.32091	7.79709	-3.59399	0.00292943	0.0180623	-2.30997
10222_at	YIR014W	NA	-1.32073	7.76498	-2.51752	0.0246056	0.0875031	-4.39236
6053_at	YPR043W	RPL43A	-1.32034	9.15101	-3.11643	0.00757385	0.0362388	-3.25117
10305_at	YJL181W	NA	1.31982	4.30475	3.48741	0.00362036	0.0211357	-2.52103
8873_at	YOR044W	NA	1.31891	5.62418	4.41376	0.000587777	0.00547889	-0.692595
8954_at	NA	NA	1.31873	8.20953	5.01339	0.000189229	0.00249996	0.460761
5345_at	YLR117C	CLF1	1.31861	6.50809	3.24222	0.0058974	0.0302466	-3.00474
10693_at	YOR280C	FSH3	-1.31851	7.74041	-2.96456	0.010238	0.0450815	-3.54637
5193_at	YDL008W	APC11	1.31803	4.56536	3.00026	0.00953867	0.04283	-3.47725
6599_at	YMR320W	NA	1.31675	6.00117	3.37613	0.00451757	0.0250035	-2.74098
5215_at	YER120W	SCS2	1.31647	5.18438	2.88942	0.011879	0.0501542	-3.69125
7640_at	YPR083W	MDM36	1.31601	6.91877	3.73716	0.00220561	0.0144051	-2.02618
5383_at	YKL171W	NA	1.31601	8.23862	1.87519	0.0817596	0.214879	-5.50401
6499_at	YDL191W	RPL35AorRPL35B	1.316	6.54909	3.63163	0.00271858	0.0170659	-2.23537
11031_s_at	YML065W	ORC1	1.31533	10.0336	3.41981	0.00414144	0.0234732	-2.65471
10258_at	YNL027W	CRZ1	-1.31508	6.99132	-1.50794	0.153782	0.348945	-6.05204
4788_at	YGL203C	KEX1	1.31446	7.80229	2.77001	0.0150318	0.0598388	-3.91952
7331_at	YGL231C	NA	1.31406	10.872	5.7637	4.8876e-05	0.000981495	1.84562
10055_at	YNL162W	RPL42AorRPL42B	1.31391	8.25457	2.71281	0.0168183	0.0654434	-4.0279
6523_at	YPR037C	ERV2	1.31273	7.25496	2.90962	0.0114139	0.0487862	-3.65238
5267_at	YNL179C	NA	1.31271	7.22947	6.58828	1.207e-05	0.000343092	3.28045
5072_at	YML073C	RPL6AorRPL6B	1.31232	4.86103	4.69126	0.00034605	0.003765	-0.154413
6102_at	YGR012W	NA	1.31143	3.66356	4.71853	0.000328655	0.00363507	-0.101929
7798_at	YIL019W	FAF1	-1.3105	11.1378	-2.60778	0.0206499	0.0761322	-4.22505
10268_at	YDR360W	NA	1.31017	7.01703	2.82185	0.0135735	0.0552589	-3.82073
7680_at	YDR059C	UBC5	1.30834	8.47368	3.73059	0.00223447	0.0145438	-2.0392
7160_at	YDR307W	NA	1.30785	10.1242	6.59099	1.20165e-05	0.00034304	3.285
7811_at	YJR141W	NA	1.30656	9.45344	2.90367	0.0115491	0.0491613	-3.66384
9109_at	YKL169C	NA	1.30628	6.71848	1.82492	0.0894011	0.230033	-5.58352
9901_at	YFR003C	YPI1	-1.3055	3.43911	-2.76362	0.0152218	0.0604149	-3.93166
7620_at	YNR055C	HOL1	1.30514	9.81094	6.36457	1.74768e-05	0.000448203	2.90051
9553_at	NA	NA	1.30511	9.15872	4.68811	0.000348121	0.00377873	-0.160485
7643_at	YAR015W	ADE1	-1.30458	4.26695	-3.9971	0.00132133	0.00990735	-1.51146
4772_at	YBR134W	NA	1.30419	5.95005	2.37122	0.032601	0.107624	-4.65871
4241_at	NA	NA	1.30354	7.47316	2.68602	0.0177242	0.0678096	-4.07842
6411_at	YPL045W	VPS16	1.30346	4.92239	2.10773	0.0535439	0.155179	-5.12037
7349_at	YGL010W	NA	1.30278	9.16407	3.10552	0.00773993	0.0368446	-3.27247
8493_at	YDR535C	NA	1.30271	6.07991	3.98599	0.00135045	0.00999715	-1.53341
6582_at	YHR124W	NDT80	1.30255	10.6821	6.14095	2.54768e-05	0.000600571	2.51376
5709_at	YLR122C	NA	1.30223	3.64763	3.26719	0.00561142	0.0292357	-2.95564
8388_at	YMR015C	ERG5	1.3016	4.12555	3.70035	0.00237234	0.0152414	-2.09915
9750_at	YKL192C	ACP1	1.30131	5.77127	3.93891	0.00148133	0.0106781	-1.62653
10573_at	YOR377W	ATF1	-1.30125	5.6588	-2.29134	0.0379532	0.120713	-4.80133
8540_at	YGL252C	RTG2	-1.301	7.09337	-2.04932	0.0596357	0.169055	-5.21904
10739_f_at	YOL073C	NA	1.30087	8.98951	5.19061	0.000136517	0.0020407	0.794223
11249_f_at	YPL076W	GPI2	1.30044	8.80117	4.14052	0.000998049	0.00799038	-1.22845
6657_at	NA	NA	1.30041	6.06508	3.36424	0.00462569	0.0253409	-2.76444
5112_at	YLR343W	GAS2	1.29925	5.89832	2.57899	0.0218398	0.0798882	-4.27864
10560_at	YDR090C	NA	1.29877	3.6512	2.38439	0.0317906	0.10561	-4.63501
4920_at	YDR079W	PET100	1.29779	6.06645	3.29907	0.00526644	0.0278848	-2.89291
8234_at	YBR213W	MET8	1.2971	7.01793	4.36283	0.000648386	0.005865	-0.792086
7676_at	YDL144C	NA	1.29695	8.13912	5.29227	0.000113411	0.00181283	0.983788
7377_at	YKL191W	DPH2	1.29656	5.76017	3.41104	0.00421434	0.0238141	-2.67204
5204_at	YJL135W	LCB3	1.29642	9.09261	2.83184	0.0133088	0.0543709	-3.80163
10733_at	YPL042C	SSN3	-1.29556	9.33312	-4.26753	0.000779622	0.00664636	-0.978749
6585_at	YKL214C	YRA2	1.29535	10.1908	5.45015	8.52647e-05	0.00147844	1.27563
7662_at	YPR201W	ARR3	1.29477	7.74666	4.55095	0.000451862	0.00453075	-0.425672
4408_at	YAR020C	PAU5orPAU7	1.29426	5.57686	4.42672	0.000573306	0.00536081	-0.667314
9987_at	YLR148W	PEP3	-1.29378	3.91533	-1.17816	0.258352	0.504438	-6.46909
10908_at	YPL010W	RET3	1.29317	7.97512	3.19217	0.00651492	0.0324997	-3.10296
8549_at	YNR040W	NA	-1.29261	8.18812	-1.25243	0.230913	0.466517	-6.38218
3525_f_at	NA	NA	-1.29244	7.05002	-3.82408	0.00185743	0.0126102	-1.8539
7200_at	YCL016C	DCC1	1.29223	7.30714	3.14596	0.00714211	0.0347429	-3.19346
6243_at	YMR182C	RGM1	1.29198	9.64086	5.22304	0.000128658	0.00195895	0.854828
9364_at	YLR318W	EST2	1.29158	7.49889	5.42305	8.95218e-05	0.00153902	1.22577
4101_at	YCL006C	NA	1.2915	7.09421	3.10261	0.00778474	0.0369448	-3.27814
4481_at	YNR071C	NA	1.29146	5.12901	3.68512	0.00244502	0.015676	-2.12934
7117_at	YLR449W	FPR4	1.29063	6.53144	3.0577	0.00851111	0.0393908	-3.36566
4466_at	YKR026C	GCN3	-1.28969	4.06231	-2.71401	0.0167788	0.0653169	-4.02564
10013_at	YDL063C	NA	1.28918	5.34572	2.95768	0.0103784	0.0454817	-3.55967
3786_s_at	YPL187W	MF(ALPHA)1	-1.28907	8.38058	-1.48914	0.15861	0.357294	-6.07788
7550_at	YNL103W	MET4	-1.28903	7.2055	-3.88752	0.001639	0.0114436	-1.72824
6333_at	YHL006C	SHU1	1.28892	8.99059	4.24735	0.000810741	0.00684911	-1.01835
4280_f_at	YBR155W	CNS1	1.28889	8.9017	3.49602	0.00355892	0.0209341	-2.50399
5251_f_at	YGL200C	EMP24	1.28806	8.12714	3.56726	0.00308911	0.01886	-2.36293
8407_at	YLR007W	NSE1	-1.28704	3.86222	-5.67007	5.763e-05	0.00111404	1.67678
5637_at	YGR222W	PET54	1.2869	7.41357	3.19037	0.00653834	0.032587	-3.1065
5997_at	NA	NA	1.28675	7.63735	2.86674	0.0124232	0.0518188	-3.73479
9743_at	YLR044C	PDC1	-1.28657	5.59996	-2.10965	0.0533542	0.154726	-5.11711
8625_at	YLR437C	NA	1.28653	10.6329	4.69061	0.000346477	0.00376527	-0.155669
8392_at	NA	NA	1.28647	7.3831	2.99702	0.00960016	0.0430646	-3.48353
5222_at	YKL222C	NA	-1.2863	8.03342	-2.29004	0.0380463	0.120968	-4.80362
6654_at	YJL161W	NA	1.28519	7.22825	2.95291	0.010477	0.0457395	-3.56889
8588_at	YCR028C-A	RIM1	-1.28508	6.13596	-2.8138	0.0137904	0.0558738	-3.83609
5786_f_at	YPL229W	NA	1.28432	7.54364	3.58401	0.00298801	0.0183507	-2.32973
6248_at	YOR265W	RBL2	1.28429	8.28772	4.49396	0.000503899	0.0048716	-0.536367
9887_at	YHR013C	ARD1	1.28426	8.35306	2.50447	0.0252347	0.0891281	-4.41638
9674_at	YBL102W	SFT2	-1.28419	8.08981	-2.72937	0.0162808	0.0637772	-3.99659
8592_at	YKR071C	DRE2	1.28348	10.672	3.25747	0.00572105	0.0296396	-2.97476
4878_at	YMR260C	TIF11	1.2833	6.70989	3.24636	0.00584902	0.0301328	-2.99661
6159_at	NA	NA	1.28304	7.5047	4.3977	0.000606238	0.00559213	-0.723954
10321_at	YEL053C	MAK10	1.2825	5.7062	3.26712	0.00561225	0.0292357	-2.95579
4157_at	YAL011W	SWC3	1.28198	8.02075	2.8809	0.0120805	0.0507345	-3.7076
6931_at	YFL015C	NA	-1.28021	8.21276	-2.17956	0.0468429	0.140288	-4.9971
5249_at	YCL045C	NA	1.27977	7.38587	3.02511	0.00907987	0.0413466	-3.42903
6051_at	YCL018W	LEU2	1.27964	7.73093	3.66337	0.00255272	0.0162328	-2.17246
8502_at	YER069W	ARG5,6	1.27747	8.46137	2.45361	0.027836	0.0955118	-4.50949
10043_at	YHL029C	NA	1.27666	9.19868	3.4856	0.0036334	0.0211661	-2.52461
8205_at	YOR206W	NOC2	-1.27584	4.35209	-1.17639	0.259038	0.505249	-6.47112
10677_at	YLL059C	NA	1.27565	7.82112	3.46923	0.00375367	0.0216433	-2.557
10924_at	YJL178C	ATG27	1.27542	5.91388	4.18865	0.000908723	0.00741515	-1.13372
10673_at	YNL322C	KRE1	-1.27515	7.48984	-4.86319	0.000250341	0.00301539	0.175313
10718_at	YML025C	YML6	-1.27275	7.03889	-2.98263	0.00987784	0.0439303	-3.5114
9462_at	YFR020W	NA	1.2726	7.15136	3.63131	0.00272031	0.0170659	-2.23601
7318_at	NA	NA	1.27138	7.24274	2.89263	0.0118039	0.0500389	-3.68507
7698_at	YGR006W	PRP18	1.27125	6.05444	3.2183	0.00618481	0.0312082	-3.0517
8347_at	YGR040W	KSS1	-1.27035	2.96311	-3.02219	0.0091327	0.0414658	-3.4347
7338_at	YLR119W	SRN2	1.2696	9.53788	4.90503	0.000231503	0.00285029	0.255066
5973_at	YER127W	LCP5	1.26872	6.58005	4.27909	0.00076235	0.00655023	-0.956076
4351_at	YDR013W	PSF1	1.26779	6.47677	2.90778	0.0114555	0.0489417	-3.65592
8940_at	YDL149W	ATG9	1.26731	8.75493	2.64883	0.0190612	0.0717004	-4.14831
4093_at	YMR179W	SPT21	1.26656	8.88723	2.29806	0.0374726	0.119715	-4.78941
11175_at	YLR084C	RAX2	-1.26635	8.6689	-2.78346	0.0146392	0.0585232	-3.89393
7151_at	YDR476C	NA	1.26508	8.63265	4.48503	0.000512598	0.0049331	-0.553742
11186_at	YNR046W	TRM112	1.2629	6.20846	3.24408	0.00587558	0.0301863	-3.00108
4349_at	NA	NA	1.2628	6.32816	3.85547	0.00174588	0.0120724	-1.79172
10359_at	YJL055W	NA	1.26242	6.58761	3.17057	0.00680099	0.0335379	-3.1453
7097_at	YLR411W	CTR3	1.26232	7.06743	2.19964	0.0451146	0.136713	-4.96228
4950_at	YDR444W	NA	1.26212	5.13225	4.33894	0.000678997	0.00605969	-0.838826
4414_at	YDL064W	UBC9	1.26205	4.37118	2.3927	0.0312889	0.104241	-4.62001
11033_at	YJR070C	LIA1	1.26197	5.50137	4.10881	0.00106178	0.00838734	-1.29095
5716_at	YNL328C	MDJ2	1.26169	10.0271	4.53368	0.000467016	0.00462802	-0.459181
4723_f_at	YKL091C	NA	1.26168	8.10496	3.23261	0.00601128	0.0305972	-3.02362
9094_s_at	YAL066W	NA	1.26162	6.44065	4.82909	0.000266868	0.00316392	0.11016
7768_at	NA	NA	1.26148	9.34293	1.35691	0.196267	0.418492	-6.25282
5125_at	YOR367W	SCP1	1.26103	5.89673	3.24458	0.00586971	0.0301855	-3.00009
6419_at	YGL015C	NA	1.26062	9.4302	2.55138	0.0230431	0.0832459	-4.32985
8892_at	YKR040C	NA	1.26024	8.15771	3.46518	0.00378404	0.0217915	-2.56502
8256_at	YHR032W	NA	1.26017	6.4029	3.30404	0.00521459	0.0277369	-2.88312
6270_at	YDL061C	RPS29AorRPS29B	-1.26002	7.03889	-3.65566	0.00259201	0.0164378	-2.18773
4538_at	YLR147C	SMD3	1.25998	8.6632	3.67218	0.00250851	0.0159952	-2.15498
5658_at	YJR138W	IML1	-1.25894	5.93078	-1.67493	0.116111	0.281311	-5.81262
11376_at	YDL130W	RPP1B	1.25849	5.23857	3.34736	0.00478374	0.0259815	-2.79774
6331_at	YPR062W	FCY1	1.25744	6.61582	2.75587	0.0154553	0.0612115	-3.94637
4563_f_at	YHR062C	RPP1	1.25739	8.73893	4.84489	0.000259074	0.00309266	0.140362
9673_at	YIR037W	HYR1	-1.25702	7.1433	-2.16548	0.0480917	0.143247	-5.02143
5686_at	YGR201C	NA	1.25688	6.27307	2.78677	0.0145442	0.0582955	-3.88763
5666_at	YNL324W	NA	1.25606	5.88025	2.2812	0.0386884	0.122428	-4.81926
11017_at	YDR367W	NA	1.25601	7.03647	2.77598	0.0148562	0.059266	-3.90815
2616_at	YGL098W	USE1	-1.25506	6.0777	-2.7443	0.0158106	0.0623013	-3.96831
5767_at	YDR510W	SMT3	-1.25496	7.11331	-1.97743	0.068007	0.18661	-5.33843
5667_at	YFL046W	NA	1.25477	8.46266	2.91931	0.0111973	0.0480143	-3.63372
4034_at	YFL017W-A	SMX2	1.25473	6.01745	2.77203	0.0149722	0.0596269	-3.91568
3182_i_at	YNL144C	NA	-1.25454	4.82205	-3.97674	0.0013752	0.0101163	-1.55171
3907_f_at	YGR024C	THG1	1.25397	8.83401	2.88027	0.0120956	0.0507536	-3.70882
3403_f_at	YOR278W	HEM4	1.25373	8.47275	3.82876	0.00184034	0.0125307	-1.84462
6151_at	YOL023W	IFM1	-1.25319	5.2017	-2.65286	0.0189117	0.071272	-4.14075
8531_at	YOL066C	RIB2	1.25273	7.41362	4.37688	0.000631052	0.00576971	-0.764622
7486_at	YJL104W	PAM16	1.25233	6.52149	4.01219	0.0012828	0.00969563	-1.48164
6704_at	YKL067W	YNK1	1.25209	5.33601	2.67427	0.0181365	0.0689911	-4.10053
10224_at	YML123C	PHO84	1.25144	8.2724	4.00671	0.00129665	0.00976938	-1.49247
5151_at	YMR232W	FUS2	1.25143	8.87757	4.23881	0.0008243	0.0069256	-1.03513
9319_at	YFL019C	NA	1.25031	5.67361	3.26833	0.00559877	0.0291981	-2.95341
10745_at	YMR237W	NA	-1.25031	6.26585	-2.74017	0.0159394	0.062648	-3.97615
4744_at	YDR425W	SNX41	1.24982	5.5923	2.26199	0.0401197	0.125551	-4.85317
10935_at	YIL096C	NA	1.2498	8.86535	4.09819	0.00108404	0.00852423	-1.31189
10445_s_at	YGR138C	NA	-1.2495	7.87281	-2.44401	0.028355	0.0968132	-4.52699
6816_at	YOR162C	YRR1	1.2494	7.24496	4.66456	0.000364011	0.0038702	-0.205894
10634_at	YMR281W	GPI12	-1.24921	6.89317	-2.66305	0.0185389	0.0701788	-4.12162
11257_at	YLR416C	NA	1.24876	5.88493	3.05166	0.00861376	0.0397476	-3.37741
7934_at	YLR095C	IOC2	1.24831	5.10479	3.23995	0.00592411	0.0302895	-3.0092
5183_at	YDR453C	TSA2	1.24733	5.69803	3.25343	0.00576719	0.0297876	-2.98269
5578_at	NA	NA	1.24718	6.82086	3.65033	0.00261957	0.01659	-2.1983
5033_at	YJL077C	ICS3	1.24568	4.94947	2.20876	0.0443495	0.134961	-4.94641
4194_at	YAL068C	PAU4orPAU6orPAU1orPAU2orDAN3	1.24562	7.99742	2.49162	0.0258691	0.0908191	-4.43998
4921_i_at	YDL120W	YFH1	1.24542	7.885	2.66052	0.0186308	0.0704981	-4.12638
11288_at	YDR439W	LRS4	1.24389	5.39987	2.36419	0.0330416	0.108416	-4.67135
7175_at	YDL166C	FAP7	1.24359	3.31623	3.89171	0.00162553	0.0114093	-1.71995
7233_at	YER055C	HIS1	-1.24351	6.25577	-2.74285	0.0158555	0.062442	-3.97105
6565_at	YLR369W	SSQ1	1.24344	10.1358	4.27763	0.000764505	0.00655716	-0.958932
6832_at	YMR243C	ZRC1	1.24325	8.1691	2.94174	0.0107112	0.0463465	-3.59046
3183_f_at	YNL288W	CAF40	-1.24291	10.9319	-3.48844	0.00361296	0.021124	-2.51899
9621_at	YPR107C	YTH1	-1.24288	8.54803	-1.87053	0.0824433	0.216304	-5.51145
6535_at	YGL190C	CDC55	-1.24273	7.33402	-1.98413	0.0671829	0.185055	-5.32739
4828_at	NA	NA	1.24257	10.5156	4.82598	0.000268434	0.00316392	0.104199
3491_f_at	YDL117W	CYK3	-1.24213	4.9807	-5.39117	9.48141e-05	0.00160388	1.16699
4438_at	YJL151C	SNA3	1.24208	9.89115	6.0689	2.88083e-05	0.000655916	2.38768
7767_at	YKL212W	SAC1	1.24189	9.86365	5.76806	4.8504e-05	0.000981495	1.85345
2819_s_at	YNL235C	NA	-1.24142	3.30053	-4.45973	0.000538085	0.00514393	-0.602989
10600_at	YJL210W	PEX2	1.24124	8.53559	3.17124	0.00679184	0.0335105	-3.14397
11373_at	YMR186W	HSC82orHSP82	1.24092	8.01746	2.31888	0.0360203	0.115948	-4.7524
4281_i_at	YPL106C	SSE1	-1.24045	7.13009	-1.92111	0.0752987	0.201056	-5.43027
3781_f_at	YKL154W	SRP102	-1.23964	7.21326	-3.63894	0.0026794	0.0169115	-2.22087
8506_at	YKL056C	NA	-1.2395	8.09761	-1.82301	0.0897043	0.230559	-5.58652
5050_at	YBR258C	SHG1	1.23945	8.08622	4.46284	0.000534879	0.00512112	-0.596925
7689_at	YCL042W	GLK1	1.23857	4.11977	3.44819	0.0039141	0.0223748	-2.59862
11319_at	YDR185C	NA	1.23722	9.12025	4.22904	0.00084008	0.00701445	-1.05431
6346_at	YJL126W	NIT2	1.23712	10.9086	5.16567	0.000142902	0.00211074	0.747517
10662_at	YIR041W	PAU3	-1.23666	10.3691	-2.36578	0.0329419	0.108241	-4.6685
5527_at	YER063W	THO1	1.23577	6.97564	3.33749	0.00487871	0.0263558	-2.81721
5349_at	YMR142C	RPL13BorRPL13A	1.23564	9.91676	5.19398	0.000135677	0.00203953	0.80053
6897_at	YJR097W	JJJ3	1.23536	6.26396	3.37294	0.00454631	0.0251421	-2.74727
8916_at	YDL175C	AIR2	1.23525	8.85938	2.26543	0.0398597	0.124988	-4.8471
3919_f_at	YKL170W	MRPL38	-1.23523	2.91724	-4.37811	0.000629563	0.00576173	-0.762226
3487_g_at	YDR503C	LPP1	1.23502	6.57834	4.17146	0.000939638	0.00761417	-1.16753
4117_at	YMR088C	VBA1	1.23481	5.73199	3.27718	0.00550095	0.0288653	-2.93599
4919_at	YGR031W	NA	-1.23457	3.43066	-2.63323	0.0196504	0.0734039	-4.17751
9020_at	YFL047W	RGD2	1.23434	6.73393	1.88781	0.0799354	0.210969	-5.48385
8191_at	YIL059C	NA	1.23381	9.86105	5.31196	0.000109426	0.00177083	1.02037
10282_at	YOR168W	GLN4	1.23215	6.93444	3.04066	0.00880397	0.040365	-3.39881
6899_at	NA	NA	1.23096	7.39098	3.33262	0.00492617	0.0265354	-2.8268
9088_at	YNL168C	NA	1.23073	6.59144	2.47559	0.0266817	0.0927993	-4.46934
8962_at	YDL179W	PCL9	1.22995	6.33666	2.69585	0.0173863	0.0669235	-4.0599
9116_at	YLR104W	NA	1.22954	7.57772	2.22048	0.0433836	0.132957	-4.92597
4195_at	YGR032W	GSC2	1.22921	9.67535	4.63741	0.000383263	0.00401995	-0.258312
8986_at	YNL204C	SPS18	1.22889	4.82342	2.06853	0.0575652	0.164535	-5.18675
4443_at	YDL123W	SNA4	1.22879	4.28638	2.61459	0.0203778	0.0755358	-4.21235
4874_at	YJR135C	MCM22	1.22865	5.04417	3.00141	0.00951695	0.0427736	-3.47502
9306_at	YGL050W	NA	1.22863	5.42185	3.96046	0.00141989	0.0103173	-1.5839
6811_at	YIR038C	GTT1	1.22789	9.18095	4.839	0.000261953	0.00311905	0.129101
3442_f_at	YMR158W	MRPS8	-1.22788	6.19704	-3.04609	0.00870961	0.0401304	-3.38826
5173_at	YGR073C	NA	1.22771	4.78981	3.70962	0.00232916	0.0150157	-2.08076
3880_f_at	YBR159W	NA	-1.22751	5.52667	-4.22151	0.000852469	0.00709251	-1.06911
4520_at	YLR254C	NDL1	1.22731	10.1679	5.6772	5.69093e-05	0.00110677	1.68968
2275_g_at	YJL133W	MRS3	1.22719	8.85848	2.93601	0.0108333	0.0467542	-3.60151
4488_at	YGR114C	NA	1.22656	5.83271	3.96561	0.0014056	0.010235	-1.57372
4092_at	YKR074W	NA	1.22506	10.0227	2.6479	0.0190958	0.071792	-4.15005
5023_at	YCR104W	PAU3	1.22478	5.57024	2.55958	0.0226792	0.0823455	-4.31466
11061_g_at	YJL106W	IME2	1.22425	10.3404	3.11082	0.00765882	0.0365517	-3.26213
6845_at	YKR078W	NA	1.22422	4.52778	2.86609	0.0124392	0.0518392	-3.73604
7425_s_at	YKR046C	PET10	1.2242	7.30216	2.66991	0.0182918	0.0694686	-4.10873
[truncated: 7,336 more rows]
