# Supplementary material for: Covert Genetic Selections to Optimize Phenotypes
Source: PLoS One. 2007 Nov 21;2(11):e1200. doi: 10.1371/journal.pone.0001200 (PMC2075469; doi:10.1371/journal.pone.0001200)
Supplement: Table S2 — glc37 vs control (1.82 MB XLS) [file pone.0001200.s007.xls]

## Sheet: glu37VScontrol_allID
ID	YN	Gene	logFC	AveExpr	t	P.Value	adj.P.Val	B
7647_at	YPR115W	NA	-7.35918	4.9102	-29.409	5.37803e-14	1.67346e-10	21.7314
4319_at	YHR206W	SKN7	-7.04153	5.25691	-32.7304	1.22523e-14	1.14376e-10	22.8867
4750_at	YGR274C	TAF1	-6.83565	5.99623	-14.448	8.2496e-10	1.20328e-07	12.9781
9971_at	YLR347C	KAP95	-6.75259	4.65573	-17.6626	5.67411e-11	1.70864e-08	15.5701
6043_at	YDR436W	PPZ2	-6.39781	6.13387	-21.7108	3.46607e-12	2.4889e-09	18.1651
2610_at	NA	NA	-6.32024	5.72825	-11.1012	2.50065e-08	1.78195e-06	9.57065
11087_at	YJL070C	NA	-6.29408	4.47852	-18.8898	2.29386e-11	8.93559e-09	16.4251
7987_at	YPL217C	BMS1	-6.2695	4.87372	-21.5054	3.94569e-12	2.63093e-09	18.0479
7354_at	YBL007C	SLA1	-6.26646	5.08012	-15.0316	4.88843e-10	8.00587e-08	13.4915
6137_at	YDR351W	SBE2	-6.13999	4.53604	-30.9832	2.61701e-14	1.22149e-10	22.3021
10179_at	YLR149C	NA	-6.11183	8.49566	-20.0148	1.04789e-11	4.89103e-09	17.1542
6177_at	YDR303C	RSC3	-6.09325	4.11489	-25.2194	4.46259e-13	6.94304e-10	19.9721
6604_at	YDL126C	CDC48	-6.01894	4.69446	-18.1959	3.80168e-11	1.34598e-08	15.9497
7733_at	YPR026W	ATH1	-6.01518	5.64968	-12.8801	3.71098e-09	3.76543e-07	11.4878
9778_at	YML109W	ZDS2	-6.0099	6.89825	-8.7187	4.92782e-07	1.71646e-05	6.53419
11066_at	YJL047C	RTT101	-5.94552	5.65135	-10.3729	5.87416e-08	3.61494e-06	8.70493
11122_at	YJL080C	SCP160	-5.93227	5.61649	-6.16461	2.44728e-05	0.000292515	2.52158
10281_at	YLR072W	NA	-5.92333	5.77577	-16.893	1.03179e-10	2.53466e-08	14.999
7728_at	YPR021C	AGC1	-5.91754	4.89572	-11.5456	1.51806e-08	1.18092e-06	10.0746
4870_at	YGR125W	NA	-5.89726	4.2832	-15.0332	4.88128e-10	8.00587e-08	13.4929
9310_at	YMR304W	UBP15	-5.88955	4.96179	-15.7053	2.73121e-10	5.54258e-08	14.059
7062_at	YBR289W	SNF5	-5.86079	7.36232	-19.8802	1.14838e-11	5.10483e-09	17.0695
4933_at	YGR097W	ASK10	-5.85272	5.28965	-14.5283	7.66783e-10	1.16725e-07	13.05
11005_at	YJR031C	GEA1	-5.78534	5.26004	-16.0909	1.97706e-10	4.19452e-08	14.3724
5003_at	YGL014W	PUF4	-5.74817	4.61647	-25.5071	3.81887e-13	6.94304e-10	20.1056
4205_at	YIL105C	SLM1	-5.73552	7.64269	-14.0996	1.13769e-09	1.47504e-07	12.6613
6687_at	YDL220C	CDC13	-5.72266	6.11705	-16.5202	1.39094e-10	3.24611e-08	14.7118
7181_at	YBR179C	FZO1	-5.67939	5.8857	-11.6405	1.36735e-08	1.11967e-06	10.18
4753_at	YGR233C	PHO81	-5.64292	4.6612	-17.6111	5.90148e-11	1.72157e-08	15.5327
11321_at	YAL002W	VPS8	-5.58211	7.38754	-6.47935	1.44413e-05	0.000200908	3.06388
4413_at	YHR120W	MSH1	-5.58015	5.38635	-10.6106	4.4228e-08	2.80863e-06	8.99305
5974_at	YDR505C	PSP1	-5.53827	3.8466	-20.5777	7.19029e-12	3.89724e-09	17.5009
6517_at	YDL035C	GPR1	-5.53755	4.22675	-20.2554	8.91022e-12	4.37773e-09	17.3038
6377_at	YDR097C	MSH6	-5.53125	4.39583	-13.8185	1.48197e-09	1.75116e-07	12.4
6429_at	YDR060W	MAK21	-5.52799	4.1136	-17.9018	4.73469e-11	1.52408e-08	15.742
11137_at	YJL110C	GZF3	-5.52507	5.53999	-11.228	2.16533e-08	1.57917e-06	9.71619
5200_at	YGL180W	ATG1	-5.5087	3.89609	-23.6933	1.05028e-12	1.37913e-09	19.2288
7303_at	YBR079C	RPG1	-5.5086	5.6395	-9.65274	1.43342e-07	6.75808e-06	7.79668
9918_at	YLR383W	SMC6	-5.50469	4.76917	-9.27074	2.34896e-07	1.00585e-05	7.29236
4890_at	YGR100W	MDR1	-5.39073	5.6581	-11.4765	1.63892e-08	1.25646e-06	9.99739
9401_at	YMR219W	ESC1	-5.38552	7.94439	-7.98827	1.38464e-06	3.75868e-05	5.47446
4435_at	YHR098C	SFB3	-5.35337	4.63938	-15.4599	3.36752e-10	6.41547e-08	13.8553
6903_at	YCL029C	BIK1	-5.34339	4.85916	-22.1266	2.67591e-12	2.27087e-09	18.3981
10778_at	YKL185W	ASH1	-5.32824	7.6458	-15.6041	2.9764e-10	5.91164e-08	13.9755
10761_at	YKL205W	LOS1	-5.31256	3.95926	-16.9327	9.99845e-11	2.52258e-08	15.0291
4360_at	YHR155W	YSP1	-5.30178	6.50181	-7.12958	5.06929e-06	9.42665e-05	4.14061
7608_at	YPR122W	AXL1	-5.30039	5.40296	-8.96569	3.52301e-07	1.38168e-05	6.8778
10592_at	YKL015W	PUT3	-5.26363	4.52133	-19.1272	1.93737e-11	8.22062e-09	16.5832
9138_at	YNL256W	FOL1	-5.23922	5.60141	-8.99056	3.4072e-07	1.34726e-05	6.91201
10019_at	YLR304C	ACO1	-5.23786	7.15818	-6.23462	2.17375e-05	0.000269482	2.64341
4228_at	YIL128W	MET18	-5.20928	6.93813	-6.13264	2.58394e-05	0.000304176	2.46573
3835_s_at	NA	NA	-5.20655	3.94185	-8.74561	4.74935e-07	1.66674e-05	6.57198
4746_at	YGR270W	YTA7	-5.20544	4.69513	-9.09822	2.95055e-07	1.22541e-05	7.05923
10266_at	YLR057W	NA	-5.20025	5.59935	-10.9333	3.03251e-08	2.05134e-06	9.37553
9326_at	YMR277W	FCP1	-5.1639	5.25226	-11.3513	1.88464e-08	1.41116e-06	9.85642
5041_at	YGL021W	ALK1	-5.15984	4.15645	-14.8003	6.002e-10	9.49639e-08	13.2905
4509_at	YHR035W	NA	-5.15105	8.92722	-23.4255	1.22712e-12	1.37913e-09	19.0919
11113_at	YJL089W	SIP4	-5.13428	5.2773	-11.0568	2.63099e-08	1.84664e-06	9.51926
7738_at	YPR030W	CSR2	-5.10918	5.87784	-9.7644	1.24417e-07	6.21087e-06	7.94108
4833_at	YGR178C	PBP1	-5.09066	7.61181	-5.97911	3.36106e-05	0.000364832	2.19555
10639_at	YKL057C	NUP120	-5.08484	5.35013	-8.45623	7.09226e-07	2.29883e-05	6.161
4440_at	YHR102W	KIC1	-5.08391	5.2941	-13.1659	2.78927e-09	2.99285e-07	11.7723
7202_at	YBR156C	SLI15	-5.06677	4.45827	-15.3616	3.66526e-10	6.84303e-08	13.7727
7917_at	YPL153C	RAD53	-5.05799	5.99265	-13.2427	2.58575e-09	2.80674e-07	11.8477
11426_s_at	NA	NA	-5.05618	7.50311	-6.6593	1.07472e-05	0.00016319	3.36773
9203_at	YNL327W	EGT2	-5.03202	5.14191	-11.5822	1.45787e-08	1.15333e-06	10.1154
4257_at	YIL144W	TID3	-5.02357	3.83994	-25.3002	4.27101e-13	6.94304e-10	20.0098
6958_s_at	YCL067C	HMRA2orBUD5orMATALPHA2orHMLALPHA2	5.02108	5.0552	13.9303	1.33331e-09	1.62739e-07	12.5046
5405_at	YFL025C	BST1	-4.96457	5.28225	-12.4224	5.93036e-09	5.48118e-07	11.0192
10702_at	YKL126W	YPK1	-4.94893	5.71901	-12.1648	7.77003e-09	6.71604e-07	10.7483
10545_at	YKR028W	SAP190	-4.94095	6.09886	-9.99526	9.3203e-08	5.00843e-06	8.23539
5324_at	YFR027W	ECO1	4.93441	6.51447	10.0095	9.15668e-08	4.96963e-06	8.25342
10919_at	YJR126C	VPS70	-4.93437	6.06186	-9.91642	1.02807e-07	5.346e-06	8.13551
6036_at	YDR430C	CYM1	-4.93429	5.88795	-6.98634	6.35312e-06	0.000111478	3.90843
8607_at	YOL045W	PSK2	-4.93364	6.59594	-6.00534	3.2127e-05	0.000354498	2.24193
8777_at	YNR065C	NA	-4.93259	8.19934	-6.24558	2.13395e-05	0.00026596	2.66241
5011_at	YGL006W	PMC1	-4.92649	4.57793	-18.1638	3.89304e-11	1.34598e-08	15.9273
4464_at	YHR082C	KSP1	-4.92501	4.07857	-15.134	4.46774e-10	7.58298e-08	13.5795
10087_at	YLR239C	LIP2	4.91354	8.85408	17.0598	9.04514e-11	2.34545e-08	15.1251
6263_at	YDR206W	EBS1	-4.90397	6.36855	-8.70535	5.01903e-07	1.7391e-05	6.5154
2116_at	NA	NA	-4.89879	3.99502	-17.8213	5.03077e-11	1.56541e-08	15.6844
11025_at	YJR003C	NA	-4.89717	8.14925	-8.02791	1.30703e-06	3.62051e-05	5.53369
8500_at	YOR073W	SGO1	-4.89254	4.62934	-14.0175	1.22839e-09	1.5496e-07	12.5856
7888_at	YPL137C	NA	-4.88418	7.63129	-5.01933	0.000187158	0.00126252	0.435397
9476_at	YMR164C	MSS11	-4.88213	3.71389	-22.1611	2.6196e-12	2.27087e-09	18.4172
6655_at	YDL165W	CDC36	4.88207	7.43311	15.5173	3.20574e-10	6.2345e-08	13.9032
6376_at	YDR096W	GIS1	-4.86942	3.48694	-21.7607	3.3593e-12	2.4889e-09	18.1933
7480_at	YBL106C	SRO77	-4.86514	6.19062	-3.99858	0.0013175	0.00551026	-1.54743
10286_at	YLR034C	SMF3	-4.86086	5.45299	-14.2391	9.99482e-10	1.38797e-07	12.7891
8328_at	YOR217W	RFC1	-4.86046	8.0534	-8.46407	7.0147e-07	2.29883e-05	6.17228
5968_at	YDR499W	LCD1	-4.85852	4.84658	-8.3306	8.4661e-07	2.59973e-05	5.9794
10233_at	YLR114C	NA	-4.85783	3.63059	-20.7332	6.49072e-12	3.78693e-09	17.5946
2609_at	NA	NA	-4.85442	4.14862	-20.5109	7.51475e-12	3.89724e-09	17.4604
11166_at	YJL129C	TRK1	-4.83965	7.62888	-6.91571	7.10824e-06	0.000120866	3.79292
9527_at	YMR128W	ECM16	-4.81927	6.78898	-5.8781	4.00303e-05	0.000413781	2.01601
3148_s_at	YCR096C	HMRA2orBUD5orMATALPHA2orHMLALPHA2	4.80916	6.87911	8.08217	1.20816e-06	3.40731e-05	5.61445
10143_at	YLR205C	HMX1	4.80528	7.71389	10.5565	4.71586e-08	2.9745e-06	8.92795
4059_at	YIR023W	DAL81	-4.79906	5.30222	-7.62329	2.37653e-06	5.70307e-05	4.91949
10006_at	YLR336C	SGD1	-4.7801	4.21892	-12.3493	6.39979e-09	5.68972e-07	10.9429
10465_at	YKR086W	PRP16	-4.77983	7.93997	-6.36815	1.73726e-05	0.000229404	2.87386
5560_at	YER167W	BCK2	-4.77526	5.49305	-4.87144	0.000246505	0.00153	0.154091
2200_at	NA	NA	-4.76635	5.38947	-4.58266	0.000425344	0.00228859	-0.401862
9141_at	YNL298W	CLA4	-4.76504	5.41891	-4.6679	0.000361714	0.00202677	-0.236899
5150_at	YGL139W	NA	-4.75802	5.2322	-12.6528	4.67527e-09	4.59406e-07	11.2571
4858_at	YGR157W	CHO2	-4.7563	6.07212	-8.78282	4.51374e-07	1.62686e-05	6.6241
5688_at	YER033C	ZRG8	-4.71725	5.41353	-9.09745	2.95358e-07	1.22541e-05	7.05818
9329_at	YMR280C	CAT8	-4.70785	3.67141	-18	4.3985e-11	1.46643e-08	15.8118
8322_at	YOR211C	MGM1	-4.69894	3.8451	-17.1128	8.67614e-11	2.31405e-08	15.165
9933_at	YLR398C	SKI2	-4.68399	5.11495	-5.64015	6.07613e-05	0.000549383	1.58762
4942_at	YGR061C	ADE6	-4.68164	6.65536	-6.49078	1.41709e-05	0.000199225	3.08332
4260_at	YIL141W	AXL2	4.66877	9.30029	9.90857	1.03819e-07	5.35443e-06	8.12553
4961_at	YGR035C	NA	4.666	5.11097	11.4747	1.64208e-08	1.25646e-06	9.99544
11062_at	YJL051W	NA	-4.66255	6.84852	-6.27111	2.04412e-05	0.000259564	2.70662
8689_at	YOL145C	CTR9	-4.64494	5.15006	-5.19976	0.000134251	0.000979855	0.775192
7443_at	YBL097W	BRN1	-4.64292	3.99522	-12.8449	3.84549e-09	3.85996e-07	11.4523
2499_s_at	NA	NA	-4.6415	6.00781	-10.534	4.84345e-08	3.03447e-06	8.90086
4734_at	YGR258C	RAD2	-4.63713	6.32453	-9.58401	1.56492e-07	7.23196e-06	7.70713
5759_at	YEL031W	SPF1	-4.63392	5.80411	-4.39532	0.000609022	0.00300298	-0.766659
4189_at	YIL075C	RPN2	-4.63124	4.71873	-12.4979	5.48347e-09	5.11882e-07	11.0976
6265_at	YDR208W	MSS4	-4.60412	5.10944	-9.36821	2.06786e-07	9.14682e-06	7.42259
8419_at	YOR127W	RGA1	-4.57235	4.25981	-8.9889	3.41481e-07	1.34726e-05	6.90973
7941_at	YPL174C	NIP100	-4.57198	4.77552	-14.1952	1.04089e-09	1.40822e-07	12.749
9099_at	YNL250W	RAD50	-4.56857	4.83243	-4.03252	0.00123267	0.00521621	-1.4803
7870_at	YPL110C	NA	-4.56303	6.93786	-3.84794	0.00177202	0.00698056	-1.84583
6167_at	YDR293C	SSD1	-4.55718	4.06558	-9.96001	9.7373e-08	5.13546e-06	8.19082
10583_at	YKL024C	URA6	4.55071	8.3255	8.50534	6.62123e-07	2.21538e-05	6.23147
3854_f_at	YKL225W	NA	4.54559	7.06516	9.59419	1.54465e-07	7.17379e-06	7.72043
10740_at	YKL179C	COY1	-4.5407	7.13332	-7.14693	4.93347e-06	9.24735e-05	4.16854
11350_at	YAL017W	PSK1	-4.53835	6.39629	-14.2474	9.91854e-10	1.38797e-07	12.7966
7673_at	YPR097W	NA	-4.53698	9.00455	-6.25007	2.11786e-05	0.000264661	2.67019
2615_s_at	NA	NA	-4.53686	6.64914	-6.89286	7.37234e-06	0.000124675	3.7554
9900_at	YLR409C	UTP21	-4.53498	7.73241	-6.83949	8.03027e-06	0.000133148	3.66748
6364_at	YDR129C	SAC6	-4.53479	4.11707	-12.5293	5.30847e-09	5.05211e-07	11.1301
10157_at	YLR177W	NA	-4.53203	9.57613	-17.2965	7.51827e-11	2.06421e-08	15.3019
8216_at	YOR326W	MYO2	-4.53161	5.32955	-4.71928	0.000328186	0.00188996	-0.137797
5046_at	YGL016W	KAP122	-4.53123	5.18073	-7.6844	2.16849e-06	5.32707e-05	5.01363
8601_at	YOL051W	GAL11	-4.51808	4.81446	-15.2488	4.04156e-10	7.25434e-08	13.6774
5339_at	YFR040W	SAP155	-4.51557	4.58112	-11.0614	2.61725e-08	1.84664e-06	9.52456
3352_s_at	NA	NA	-4.50137	7.84649	-5.88579	3.94989e-05	0.000410604	2.02973
10372_at	YLL016W	SDC25	-4.49952	5.13106	-8.39933	7.68268e-07	2.44771e-05	6.079
5662_at	YER050C	RSM18	4.49719	6.8298	8.90776	3.80921e-07	1.45733e-05	6.79786
6787_at	YCR092C	MSH3	-4.49436	5.93916	-6.489	1.42128e-05	0.000199513	3.08029
4192_at	YIL119C	RPI1	-4.48964	3.70648	-23.2885	1.32964e-12	1.37913e-09	19.0211
8580_at	YOL027C	MDM38	-4.48477	6.05911	-8.52574	6.43542e-07	2.16096e-05	6.26065
5976_at	YDR507C	GIN4	-4.48444	5.45342	-4.48657	0.000511082	0.00261136	-0.588593
10497_at	YKR072C	SIS2	-4.4826	5.29361	-14.1155	1.12094e-09	1.47504e-07	12.676
2199_at	NA	NA	-4.48134	5.71567	-4.61553	0.000399534	0.00218492	-0.338154
8696_at	YOL138C	NA	-4.47245	5.03261	-5.46819	8.2548e-05	0.000687839	1.27335
7704_at	YPR040W	TIP41	-4.46829	5.65256	-9.7088	1.33484e-07	6.55006e-06	7.86935
6694_at	YDL214C	PRR2	-4.4677	6.85637	-5.61702	6.33027e-05	0.000565484	1.54558
9460_at	YMR189W	GCV2	-4.46439	7.05213	-4.55041	0.000452327	0.00239377	-0.464432
10191_at	YLR166C	SEC10	-4.46369	5.37698	-5.88316	3.96797e-05	0.000411109	2.02504
8656_at	YOL087C	NA	-4.4481	6.15654	-3.91547	0.00155123	0.00626059	-1.71197
3913_s_at	NA	NA	4.43892	10.6678	4.4321	0.000567414	0.00284011	-0.694813
5599_at	YER114C	BOI2	-4.43252	8.66935	-4.60372	0.000408621	0.0022203	-0.361043
2614_s_at	NA	NA	-4.43089	5.0749	-5.98467	3.32903e-05	0.000362197	2.20539
4226_at	YIL130W	NA	-4.43069	6.38055	-5.00166	0.000193392	0.00129135	0.401917
7819_at	YPL070W	MUK1	-4.4268	4.81593	-11.0239	2.73198e-08	1.88911e-06	9.48115
7643_at	YPR111W	DBF20	-4.4232	4.26695	-13.5522	1.91217e-09	2.17684e-07	12.1475
7988_at	YPL216W	NA	-4.41859	5.26752	-5.40066	9.32059e-05	0.000752579	1.14889
7546_at	YPR194C	OPT2	-4.41738	5.4025	-7.29148	3.94045e-06	8.05987e-05	4.39966
8941_at	YNL091W	NST1	-4.41668	3.61969	-16.5909	1.31372e-10	3.14451e-08	14.7668
10507_at	YKR082W	NUP133	-4.41106	3.86045	-11.6532	1.34846e-08	1.11397e-06	10.194
8623_at	YOL075C	NA	-4.40308	5.55041	-8.32729	8.5059e-07	2.59973e-05	5.97459
6669_at	YDL194W	SNF3	-4.38427	5.04549	-9.71211	1.32927e-07	6.55006e-06	7.87362
10647_at	YKL092C	BUD2	-4.38423	7.32344	-5.63332	6.15004e-05	0.000554157	1.57522
11374_at	YAL035W	FUN12	-4.37931	6.95324	-8.76092	4.65088e-07	1.6571e-05	6.59344
11425_s_at	NA	NA	-4.3783	7.14071	-6.71749	9.77718e-06	0.000152611	3.46502
5242_at	YGL227W	VID30	-4.35426	6.49341	-5.79064	4.66236e-05	0.00045662	1.85945
6189_at	YDR269C	NA	-4.34795	9.22787	-14.2266	1.01106e-09	1.38797e-07	12.7777
10587_at	YKL020C	SPT23	-4.34267	5.36863	-5.27915	0.000116147	0.00087509	0.923477
9127_at	YNL267W	PIK1	-4.33503	7.45124	-5.10814	0.000158838	0.00111215	0.603137
4315_at	YHR201C	PPX1	4.33302	10.3302	14.1126	1.12394e-09	1.47504e-07	12.6733
10928_at	YJR089W	BIR1	-4.32574	5.10969	-8.1424	1.10763e-06	3.22575e-05	5.70363
8352_at	YOR195W	SLK19	-4.32067	3.51524	-21.2392	4.67509e-12	2.90946e-09	17.8939
10632_at	YKL064W	MNR2	-4.31634	6.05165	-8.54199	6.29131e-07	2.13561e-05	6.28387
9355_at	YMR261C	TPS3	-4.31317	6.11483	-4.34997	0.000664686	0.00321495	-0.855404
6630_at	YDL145C	COP1	-4.28912	5.90396	-10.8177	3.46786e-08	2.26381e-06	9.23966
2498_s_at	NA	NA	-4.28494	5.7121	-12.5266	5.32333e-09	5.05211e-07	11.1273
3529_f_at	NA	NA	-4.28104	6.03082	-5.22639	0.000127871	0.00094511	0.825029
2766_s_at	NA	NA	-4.2807	6.33589	-8.99985	3.36501e-07	1.34726e-05	6.92476
8975_at	YNL102W	POL1	-4.28056	4.05292	-17.4329	6.76546e-11	1.9138e-08	15.4026
6551_at	YDL090C	RAM1	-4.27442	4.64304	-15.2271	4.11869e-10	7.25434e-08	13.6589
7865_at	YPL115C	BEM3	-4.27167	7.04743	-5.99041	3.29632e-05	0.000359057	2.21553
11108_at	YJL094C	KHA1	-4.27125	9.04244	-6.7573	9.1669e-06	0.000146287	3.53131
10215_at	YLR096W	KIN2	-4.26497	7.14051	-6.49979	1.39615e-05	0.000197439	3.09863
4468_at	YHR086W	NAM8	-4.26459	5.10826	-6.9847	6.36967e-06	0.000111559	3.90576
2735_s_at	NA	NA	-4.2637	4.0569	-9.98692	9.41717e-08	5.02339e-06	8.22486
6505_at	YDL046W	NA	4.25189	8.27342	10.3549	6.00287e-08	3.61528e-06	8.68291
5179_at	YGL156W	AMS1	-4.24844	5.39602	-5.31247	0.000109326	0.000837895	0.985464
10602_at	YKL050C	NA	-4.24704	6.71751	-4.51322	0.000485659	0.00252288	-0.53673
10957_at	YJR073C	OPI3	4.2467	7.48334	14.3735	8.83162e-10	1.26836e-07	12.911
8277_at	YOR256C	NA	-4.24282	6.04995	-4.60584	0.000406974	0.00221426	-0.356934
8535_at	YOR017W	PET127	-4.23712	6.26941	-4.64163	0.000380199	0.00210508	-0.287655
9524_at	YMR125W	STO1	-4.23642	4.36978	-11.4053	1.77408e-08	1.34643e-06	9.91743
7636_at	YPR105C	COG4	-4.23459	7.89391	-4.77898	0.000293231	0.00174374	-0.0229904
7306_at	YBR038W	CHS2	-4.2277	5.69051	-9.75693	1.25597e-07	6.2364e-06	7.93146
10110_at	YLR218C	NA	4.22281	6.70216	7.42309	3.2189e-06	7.08906e-05	4.60762
5079_at	YGL073W	HSF1	-4.21006	7.01468	-9.6568	1.42602e-07	6.75732e-06	7.80196
7651_at	YPR119W	CLB2	-4.2079	4.22306	-16.1052	1.95374e-10	4.19452e-08	14.3838
9562_at	YMR076C	PDS5	-4.20255	4.14319	-4.63366	0.000386001	0.00212836	-0.303075
6603_at	YDL127W	PCL2	4.19702	9.28935	16.1391	1.89973e-10	4.19452e-08	14.411
6067_at	YDR416W	SYF1	-4.19486	6.60176	-6.83394	8.10213e-06	0.000133864	3.65831
11009_at	YJR035W	RAD26	-4.18605	5.69838	-10.2142	7.12036e-08	4.05296e-06	8.50936
10291_at	YLR039C	RIC1	-4.18287	3.79316	-11.7686	1.18875e-08	9.9973e-07	10.321
10212_at	YLR138W	NHA1	-4.18227	6.86705	-6.65209	1.08743e-05	0.000164791	3.35564
3897_s_at	NA	NA	-4.17816	4.27456	-4.83035	0.000266236	0.00161691	0.0755145
4083_at	YIR002C	MPH1	-4.17005	9.25386	-6.23944	2.15614e-05	0.000268017	2.65177
5103_at	YGL094C	PAN2	-4.1686	5.99545	-4.84364	0.000259683	0.00159064	0.100946
6097_at	YDR356W	SPC110	-4.16765	3.6639	-15.1941	4.23908e-10	7.32811e-08	13.6308
4930_at	YGR094W	VAS1	-4.16041	3.62067	-6.88771	7.43337e-06	0.000125254	3.74692
10895_at	YJR147W	HMS2	-4.15916	6.21334	-7.97426	1.41322e-06	3.7947e-05	5.45348
5108_at	YGL089C	MF(ALPHA)2	4.1487	6.27298	10.0586	8.61773e-08	4.76015e-06	8.31518
2734_s_at	NA	NA	-4.1486	4.18413	-10.9892	2.84308e-08	1.93724e-06	9.44082
11250_s_at	YJL222W	VTH2orVTH1	-4.1416	3.96535	-4.85338	0.000254983	0.00157113	0.119582
3136_s_at	NA	NA	-4.12987	5.08667	-4.3538	0.000659784	0.00320123	-0.847894
10338_at	YLL005C	SPO75	-4.12946	5.81245	-6.87035	7.64271e-06	0.000127697	3.71835
7099_at	YBR281C	NA	-4.12592	8.86866	-5.57689	6.79793e-05	0.000596416	1.47247
10156_at	YLR176C	RFX1	-4.12235	4.76316	-9.36473	2.07726e-07	9.14682e-06	7.41796
10802_at	YKL210W	UBA1	-4.11825	6.0464	-9.02267	3.26364e-07	1.31914e-05	6.95606
11168_at	YJL127C	SPT10	-4.11657	4.22418	-15.7542	2.62061e-10	5.43632e-08	14.0992
9058_at	YNL201C	PSY2	-4.11567	4.85125	-8.82458	4.26404e-07	1.57331e-05	6.68238
8274_at	YOR253W	NAT5	-4.11438	9.44743	-9.67189	1.39891e-07	6.66275e-06	7.82154
9638_at	YMR016C	SOK2	-4.10833	5.37144	-7.08281	5.45546e-06	9.98563e-05	4.0651
8834_at	YNR031C	SSK2	-4.10718	5.13233	-13.6216	1.78869e-09	2.06141e-07	12.2137
8992_at	YNL130C	CPT1	-4.10471	9.47953	-9.86798	1.09223e-07	5.5413e-06	8.07383
7481_at	YBL105C	PKC1	-4.10333	4.91039	-10.3127	6.31745e-08	3.75627e-06	8.631
4080_at	YIL002C	INP51	-4.09877	6.71437	-6.49589	1.40518e-05	0.000197848	3.092
8995_at	YNL127W	FAR11	-4.08552	5.48961	-5.21399	0.000130801	0.000962957	0.801836
11039_at	YJL028W	NA	4.08392	6.7348	7.87263	1.6402e-06	4.22964e-05	5.3005
7932_at	YPL183C	NA	-4.07643	5.3106	-6.95997	6.6247e-06	0.000115376	3.86538
6800_at	YCR106W	RDS1	-4.07619	7.202	-5.03653	0.000181288	0.00123258	0.467967
4843_at	YGR143W	SKN1	-4.06354	5.31374	-10.2698	6.65417e-08	3.85818e-06	8.57822
7650_at	YPR118W	NA	4.06285	9.66061	18.7783	2.48492e-11	9.2787e-09	16.3501
8586_at	YOL021C	DIS3	-4.06159	5.07317	-10.0874	8.31746e-08	4.62164e-06	8.35127
10880_at	YJR132W	NMD5	-4.05752	8.90119	-5.31927	0.000107984	0.000829334	0.998108
7400_at	YBL052C	SAS3	-4.03776	6.6501	-8.45963	7.05852e-07	2.29883e-05	6.16589
8364_at	YOR207C	RET1	-4.03775	6.42436	-5.47218	8.19588e-05	0.000684946	1.28069
7778_at	YPL020C	ULP1	-4.03736	4.68221	-12.9879	3.33016e-09	3.49013e-07	11.5958
2397_at	NA	NA	-4.03354	5.98303	-6.62318	1.13998e-05	0.000169725	3.3071
2197_s_at	NA	NA	-4.02586	4.58876	-14.9878	5.08098e-10	8.17775e-08	13.4537
7740_at	YPR032W	SRO7	-4.02409	4.75325	-7.65291	2.27317e-06	5.52606e-05	4.96519
10621_at	YKL031W	NA	4.02057	8.30434	11.5997	1.43009e-08	1.15333e-06	10.1348
6722_at	YDL231C	BRE4	-4.01611	6.98702	-4.31259	0.00071447	0.0034098	-0.928645
11229_at	YJL197W	UBP12	-4.01442	4.45294	-5.67558	5.70725e-05	0.000523866	1.65189
3249_s_at	NA	NA	-4.01324	4.76569	-4.18492	0.000915347	0.00413849	-1.17957
8316_at	YOR249C	APC5	-4.009	9.6507	-5.7478	5.02591e-05	0.000479722	1.78237
9201_at	YNL329C	PEX6	-4.00682	6.41468	-4.97076	0.000204814	0.00134738	0.343286
10203_at	YLR129W	DIP2	-4.00547	6.34335	-5.30754	0.000110308	0.000842448	0.976305
9939_at	YLR404W	NA	4.00508	8.3072	9.57653	1.57998e-07	7.26559e-06	7.69735
6729_at	YDL223C	HBT1	-4.00468	6.54433	-6.54043	1.30568e-05	0.000189557	3.16753
2396_at	NA	NA	-4.00161	6.25975	-6.75515	9.19877e-06	0.000146287	3.52774
6363_at	YDR128W	NA	-3.99959	5.58847	-4.17431	0.000934441	0.00420386	-1.20046
4441_at	YHR103W	SBE22	-3.99627	3.7929	-8.96265	3.53747e-07	1.38168e-05	6.87361
9707_at	YML049C	RSE1	-3.99377	6.75118	-5.86657	4.08405e-05	0.000419413	1.99543
5572_at	YER132C	PMD1	-3.98988	4.22542	-8.8991	3.85409e-07	1.46629e-05	6.78587
7196_at	YBR150C	TBS1	-3.9796	4.34844	-13.1158	2.9314e-09	3.10962e-07	11.7229
5590_at	YER105C	NUP157	-3.97762	4.29711	-14.4705	8.08185e-10	1.19752e-07	12.9983
6888_at	YCR011C	ADP1	-3.97579	5.87915	-8.16654	1.06984e-06	3.16043e-05	5.73926
7892_at	YPL133C	RDS2	-3.9744	6.18632	-6.77578	8.89731e-06	0.000143201	3.56202
9046_at	YNL167C	SKO1	-3.97132	4.27283	-8.76978	4.5949e-07	1.64974e-05	6.60585
10521_at	YKR049C	NA	3.96576	5.92992	7.72677	2.03562e-06	5.07458e-05	5.07861
6100_at	YDR359C	VID21	-3.96436	7.00588	-7.18059	4.68075e-06	8.84509e-05	4.22262
7652_at	YPR120C	CLB5	-3.96246	7.46735	-7.24098	4.26102e-06	8.37402e-05	4.31923
10754_at	YKL165C	MCD4	-3.96223	6.9014	-3.52349	0.00336975	0.011866	-2.48939
8190_at	YOR346W	REV1	-3.95709	5.91547	-4.82673	0.000268054	0.00162275	0.0685729
7114_at	YBR249C	ARO4	3.95687	9.46637	11.942	9.85461e-09	8.43971e-07	10.5096
11184_at	YJL154C	VPS35	-3.95129	5.16683	-4.20206	0.000885323	0.00403342	-1.14582
11101_at	YJL056C	ZAP1	-3.94739	3.99688	-8.76451	4.6281e-07	1.6553e-05	6.59847
10183_at	YLR153C	ACS2	-3.94676	6.77464	-8.38656	7.8223e-07	2.47529e-05	6.06053
4215_g_at	YIL141W	AXL2	3.94625	8.16003	6.85958	7.77559e-06	0.000129385	3.70062
8332_at	YOR221C	MCT1	-3.94197	9.3643	-12.9373	3.50346e-09	3.59393e-07	11.5452
9854_at	YLR450W	HMG2	-3.93828	8.13707	-4.8568	0.000253355	0.00156316	0.126119
4199_at	YIL112W	HOS4	-3.93785	6.74865	-5.31903	0.000108031	0.000829334	0.997665
7807_at	YPL036W	PMA2	-3.93176	7.1718	-7.47842	2.95849e-06	6.75244e-05	4.69434
8339_at	YOR227W	NA	-3.92922	7.15161	-3.6596	0.00257187	0.00945212	-2.21947
7762_at	YPR010C	RPA135	-3.92879	3.89824	-9.67188	1.39893e-07	6.66275e-06	7.82153
9440_at	YMR172W	HOT1	-3.92561	5.3514	-8.65926	5.3477e-07	1.84209e-05	6.45042
6190_at	YDR270W	CCC2	-3.91617	8.26322	-8.1127	1.15606e-06	3.31036e-05	5.65971
11357_at	YAL053W	NA	-3.91326	5.77545	-12.6752	4.56947e-09	4.53787e-07	11.28
7923_at	YPL147W	PXA1	-3.91169	5.37501	-9.2745	2.33739e-07	1.00551e-05	7.29741
8193_at	YOR349W	CIN1	-3.91158	6.61793	-4.22863	0.000840751	0.00386893	-1.09354
9723_at	YML076C	WAR1	-3.89898	5.24138	-7.5681	2.58254e-06	6.02699e-05	4.83405
10176_at	YLR146C	SPE4	3.89814	8.44055	12.5203	5.35789e-09	5.05211e-07	11.1208
10077_at	YLR272C	YCS4	-3.89547	4.66966	-3.00728	0.00940684	0.0276054	-3.50428
4363_at	YHR158C	KEL1	-3.88374	3.73226	-9.91835	1.02559e-07	5.346e-06	8.13797
10572_at	YKR009C	FOX2	-3.87631	6.9263	-3.13441	0.00730791	0.0223529	-3.25647
10585_at	YKL022C	CDC16	-3.87579	6.06488	-4.93367	0.000219455	0.00142166	0.272764
6542_at	YDL056W	MBP1	-3.87159	4.95281	-10.2943	6.45955e-08	3.79245e-06	8.60839
3557_s_at	NA	NA	-3.8681	3.4156	-4.58948	0.000419846	0.0022682	-0.388622
4892_at	YGR102C	NA	3.86726	5.5015	8.10806	1.16382e-06	3.31227e-05	5.65284
4790_at	YGR224W	AZR1	-3.86723	6.6666	-8.47544	6.90387e-07	2.28538e-05	6.18861
4914_at	YGR078C	PAC10	3.86639	8.6058	7.65359	2.27086e-06	5.52606e-05	4.96623
11207_at	YJL176C	SWI3	-3.86193	4.59303	-9.87632	1.08089e-07	5.5413e-06	8.08447
4897_at	YGR107W	NA	3.86094	6.50446	11.1327	2.41247e-08	1.73234e-06	9.60695
4737_at	YGR261C	APL6	-3.86065	8.41211	-6.47604	1.45207e-05	0.000201257	3.05824
6506_at	YDL045W-A	MRP10	3.85841	6.83446	7.78897	1.8559e-06	4.72065e-05	5.17358
10513_at	YKR041W	NA	3.85819	5.19202	9.04873	3.15185e-07	1.287e-05	6.99172
6488_at	YDL019C	OSH2	-3.85488	5.09753	-7.27152	4.06399e-06	8.17408e-05	4.36792
6593_at	YDL093W	PMT5	-3.8524	5.44103	-5.74392	5.06019e-05	0.000481395	1.77539
10088_at	YLR240W	VPS34	-3.85017	8.26281	-3.77724	0.00203752	0.00783418	-1.98606
4107_at	YIL017C	VID28	-3.84967	6.39942	-5.64493	6.0249e-05	0.000546043	1.59631
6673_at	YDL190C	UFD2	-3.84843	7.05543	-4.41102	0.000590882	0.0029262	-0.735965
8005_at	YPL245W	NA	-3.84793	8.10172	-10.9024	3.14289e-08	2.09564e-06	9.33933
7385_at	YBL022C	PIM1	-3.84619	5.98852	-10.2819	6.55743e-08	3.82585e-06	8.5931
10480_at	YKR099W	BAS1	-3.84511	5.87955	-6.09117	2.77327e-05	0.00031804	2.39306
6175_at	YDR301W	CFT1	-3.84368	4.57929	-4.38561	0.00062052	0.00304711	-0.785643
5247_at	YGL223C	COG1	3.83793	9.22057	12.3991	6.07551e-09	5.56028e-07	10.995
7773_at	YPL025C	NA	3.83774	6.58344	8.44338	7.22127e-07	2.32872e-05	6.14252
6179_at	YDR305C	HNT2	3.83575	8.19697	10.1322	7.87168e-08	4.40013e-06	8.40733
2733_g_at	NA	NA	-3.83134	3.77547	-10.709	3.93819e-08	2.55299e-06	9.11076
4247_at	YIL154C	IMP2'	3.82795	9.19215	6.20544	2.28363e-05	0.000279393	2.59272
10998_at	YJR021C	REC107	3.82588	9.65674	7.6382	2.32389e-06	5.62946e-05	4.94251
6902_at	YCL030C	HIS4	-3.82358	10.3536	-5.53794	7.28646e-05	0.000630932	1.40129
9924_at	YLR389C	STE23	-3.82101	5.8017	-4.80112	0.000281264	0.00168849	0.0195017
9731_at	YML068W	ITT1	-3.81794	4.24058	-8.36577	8.0552e-07	2.51489e-05	6.03043
2776_at	NA	NA	-3.81266	3.99732	-13.2439	2.5828e-09	2.80674e-07	11.8489
5299_at	YFR045W	NA	3.81239	4.65302	9.16408	2.70356e-07	1.13683e-05	7.14863
9962_at	YLR381W	CTF3	-3.8118	6.0873	-5.02511	0.000185166	0.00125437	0.446337
9028_at	YNL186W	UBP10	-3.78246	5.87456	-7.35549	3.5703e-06	7.57472e-05	4.50109
7889_at	YPL136W	NA	-3.77657	7.61639	-4.77589	0.000294942	0.00175146	-0.0289258
4810_at	YGR200C	ELP2	-3.77034	6.54566	-7.98788	1.38544e-06	3.75868e-05	5.47387
2395_at	NA	NA	-3.77014	5.85216	-7.37004	3.49139e-06	7.44112e-05	4.52407
6092_at	YDR395W	SXM1	-3.76938	6.24045	-5.81084	4.5006e-05	0.000446473	1.8957
9400_at	YMR218C	TRS130	-3.76805	4.45889	-10.0218	9.01889e-08	4.92347e-06	8.26886
10743_at	YKL176C	LST4	-3.76574	7.07202	-5.29972	0.000111885	0.00085122	0.961766
5004_at	YGL013C	PDR1	-3.76327	8.2826	-6.34794	1.79692e-05	0.000234277	2.83914
7323_at	YBR055C	PRP6	-3.76056	5.99485	-6.33928	1.82313e-05	0.000236374	2.82425
2765_s_at	NA	NA	-3.75776	6.81939	-9.69086	1.36559e-07	6.60505e-06	7.84613
11358_at	YAL051W	OAF1	-3.7565	5.41934	-5.68784	5.58511e-05	0.000516719	1.67409
9461_at	YMR190C	SGS1	-3.75388	3.79497	-7.72154	2.05154e-06	5.09339e-05	5.0706
10538_at	YKR021W	NA	-3.75337	4.95022	-7.1972	4.56116e-06	8.70724e-05	4.24923
11424_g_at	NA	NA	-3.74405	6.51451	-6.4689	1.46934e-05	0.000202903	3.04609
10097_at	YLR249W	YEF3	-3.74241	6.23524	-7.45961	3.04443e-06	6.8813e-05	4.6649
2818_at	NA	NA	-3.74143	4.49418	-3.66912	0.00252377	0.00932677	-2.20058
5235_at	YGL233W	SEC15	-3.73992	4.50226	-7.14053	4.98312e-06	9.30348e-05	4.15824
2781_at	NA	NA	-3.73682	5.76781	-5.24303	0.000124047	0.000921225	0.856107
10746_at	YKL173W	SNU114	-3.73391	6.22227	-6.49873	1.3986e-05	0.000197439	3.09683
5596_at	YER111C	SWI4	-3.72642	3.60736	-13.7819	1.5344e-09	1.79045e-07	12.3656
10902_at	YJR109C	CPA2	-3.72222	5.9983	-3.92437	0.0015243	0.00618669	-1.69434
7939_at	YPL176C	NA	-3.7179	5.8332	-9.48985	1.76622e-07	7.91619e-06	7.58362
4222_at	YIL134W	FLX1	3.71759	5.14576	6.96312	6.59158e-06	0.000115014	3.87054
7296_at	YBR073W	RDH54	-3.71683	8.40758	-6.36385	1.74977e-05	0.000229778	2.86648
4539_at	YHL023C	RMD11	-3.70449	4.47231	-6.98248	6.3921e-06	0.000111742	3.90214
10930_at	YJR091C	JSN1	-3.69767	4.29913	-6.66838	1.05894e-05	0.000161787	3.38295
9479_at	YMR167W	MLH1	-3.69282	6.12042	-7.29706	3.90663e-06	8.02419e-05	4.40852
7365_at	YBR005W	RCR1	3.69171	6.55587	7.51914	2.78109e-06	6.41024e-05	4.75791
5757_at	YEL033W	NA	3.68411	6.91825	7.54163	2.68794e-06	6.22629e-05	4.79293
4191_at	YIL073C	SPO22	-3.68311	5.72723	-4.49172	0.000506065	0.00259577	-0.578567
8915_at	YNL072W	RNH201	3.68292	7.00195	4.69352	0.000344575	0.00195776	-0.187451
9572_at	YMR086W	NA	-3.68209	5.78048	-6.53203	1.32386e-05	0.000191304	3.1533
3114_s_at	NA	NA	-3.67941	6.5043	-5.95186	3.52287e-05	0.000377133	2.14725
8893_at	YNL049C	SFB2	-3.67937	6.25181	-5.40692	9.2161e-05	0.000745757	1.16044
10756_at	YKL163W	PIR3	3.67089	6.41541	8.32041	8.58929e-07	2.60328e-05	5.96458
6643_at	YDL177C	NA	3.66967	6.53452	7.97009	1.42186e-06	3.80317e-05	5.44722
9693_at	YML061C	PIF1	-3.66719	5.82665	-5.09286	0.000163373	0.00113305	0.574351
8947_at	YNL085W	MKT1	-3.66474	6.05248	-6.64148	1.10641e-05	0.000166317	3.33785
9623_at	YMR001C	CDC5	-3.65234	6.65028	-5.66462	5.81878e-05	0.000530971	1.63203
10891_at	YJR143C	PMT4	-3.6512	6.60322	-5.54348	7.21481e-05	0.000625931	1.41142
10968_at	YJR039W	NA	-3.64519	7.32675	-4.70627	0.000336364	0.0019234	-0.162877
7456_at	YBL085W	BOI1	-3.64507	5.35049	-7.62126	2.38377e-06	5.70577e-05	4.91636
4459_at	YHR079C	IRE1	-3.64053	3.76861	-12.6391	4.74131e-09	4.61043e-07	11.2431
11329_at	YAR014C	BUD14	-3.62611	6.23155	-6.64817	1.0944e-05	0.000165312	3.34907
3512_f_at	NA	NA	-3.62371	5.34936	-4.84112	0.000260913	0.00159504	0.0961213
10239_at	YLR075W	RPL10	3.62149	7.49739	7.22775	4.34947e-06	8.47647e-05	4.29811
7899_at	YPL126W	NAN1	-3.60499	5.83319	-4.56308	0.000441526	0.00235288	-0.439847
9337_at	YMR288W	HSH155	-3.59925	7.64271	-5.32312	0.000107233	0.000826862	1.00526
5399_at	YFL032W	HAC1	3.59906	6.8705	7.47498	2.97403e-06	6.77135e-05	4.68896
3250_s_at	NA	NA	-3.59868	4.67893	-4.18437	0.000916317	0.00414028	-1.18064
10479_at	YKR098C	UBP11	-3.59833	5.41851	-7.11284	5.2041e-06	9.63894e-05	4.11362
8566_at	YOR005C	DNL4	-3.59739	8.03049	-5.0969	0.000162161	0.00112632	0.581966
7174_at	YBR172C	SMY2	-3.59527	7.73854	-7.01464	6.07464e-06	0.000107808	3.95454
7352_at	YBL009W	NA	-3.58626	7.30468	-2.74823	0.015689	0.042292	-4.00187
10672_at	YKL112W	ABF1	-3.58564	6.26353	-7.93562	1.49535e-06	3.92358e-05	5.39547
8659_at	YOL084W	PHM7	-3.5724	9.77224	-4.2469	0.000811449	0.0037686	-1.05762
4285_at	YIL166C	NA	-3.56783	6.97736	-7.38996	3.38631e-06	7.30051e-05	4.55549
10765_at	YKL197C	PEX1	-3.56708	9.03338	-3.98023	0.00136581	0.00568426	-1.58373
9769_g_at	YML117W	NAB6	-3.5644	6.30041	-5.03605	0.00018145	0.00123278	0.467057
9432_at	YMR205C	PFK2	-3.5629	6.03973	-4.72297	0.000325905	0.00188197	-0.130688
9615_at	YMR037C	MSN2	-3.56058	5.9034	-4.9867	0.000198838	0.00131829	0.373541
2608_at	NA	NA	-3.55867	4.55622	-10.3712	5.88614e-08	3.61494e-06	8.70286
2775_at	NA	NA	-3.55714	3.70981	-11.0142	2.76262e-08	1.89625e-06	9.46987
2724_s_at	NA	NA	-3.55455	4.28427	-4.57952	0.000427892	0.00229694	-0.407938
9005_at	YNL163C	RIA1	-3.54469	6.4816	-3.55797	0.00314664	0.0111773	-2.42106
6357_at	YDR122W	KIN1	-3.53936	5.89462	-3.99018	0.0013394	0.00558681	-1.56405
8298_at	YOR232W	MGE1	3.53134	4.75547	8.11915	1.14534e-06	3.31015e-05	5.66926
11234_at	YJL192C	SOP4	3.5283	6.50671	11.1451	2.37866e-08	1.7213e-06	9.62122
4254_at	YIL147C	SLN1	-3.52415	5.08769	-5.3438	0.000103289	0.000805517	1.04364
6849_at	YCR017C	CWH43	-3.51575	7.29496	-7.52028	2.7763e-06	6.41024e-05	4.75968
5262_at	YGL251C	HFM1	-3.5125	8.43673	-5.17256	0.000141108	0.00101875	0.724216
6096_at	YDR355C	NA	-3.5111	7.67417	-11.3489	1.8896e-08	1.41116e-06	9.85376
6467_at	YDR006C	SOK1	-3.51	7.28152	-4.08606	0.00111005	0.0048152	-1.37453
5218_at	YGL207W	SPT16	-3.50114	6.24394	-7.57453	2.55757e-06	5.99873e-05	4.84403
8366_at	YOR165W	SEY1	-3.49794	4.70114	-3.35235	0.00473652	0.0157687	-2.82799
6205_at	YDR285W	ZIP1	-3.49724	6.73242	-5.93448	3.63033e-05	0.000384666	2.11639
4710_at	YGR280C	PXR1	3.49572	8.34175	4.90512	0.00023146	0.00147085	0.218377
7356_at	YBL005W	PDR3	-3.49492	8.3148	-6.82982	8.15587e-06	0.000134277	3.65151
10352_at	YLL034C	RIX7	-3.49414	5.83847	-7.98483	1.3916e-06	3.75868e-05	5.46931
9415_at	YMR231W	PEP5	-3.49073	5.66742	-4.32434	0.000698422	0.00334862	-0.905613
11007_at	YJR033C	RAV1	-3.48748	5.77994	-3.47017	0.00374664	0.0129441	-2.59502
6217_at	YDR252W	BTT1	3.4822	8.90233	7.14568	4.94315e-06	9.24735e-05	4.16652
10962_at	YJR078W	BNA2	-3.48136	6.59964	-4.54237	0.000459331	0.00242115	-0.480058
4204_at	YIL107C	PFK26	-3.48057	7.2994	-3.3906	0.00438934	0.0147815	-2.75244
9031_at	YNL183C	NPR1	-3.48032	6.43183	-3.60285	0.00287832	0.0103702	-2.33205
3790_s_at	YLL067C	YRF1-5orYRF1-4orYRF1-7orYRF1-6orYRF1-3orYRF1-2orYRF1-1	-3.47892	8.42667	-4.77743	0.000294089	0.0017475	-0.0259696
9988_at	YLR319C	BUD6	-3.47839	5.75931	-6.52364	1.3423e-05	0.000192775	3.13908
10067_at	YLR263W	RED1	-3.4759	3.68559	-6.80191	8.53043e-06	0.000138731	3.60533
2913_at	NA	NA	-3.47547	5.65211	-8.89719	3.86402e-07	1.46629e-05	6.78323
3315_f_at	NA	NA	-3.4731	4.35676	-4.0008	0.00131178	0.00549124	-1.54304
8291_at	YOR270C	VPH1	-3.47018	7.78261	-5.05434	0.000175414	0.00119951	0.501638
10168_at	YLR187W	SKG3	-3.46668	6.13335	-7.36469	3.52018e-06	7.48539e-05	4.51563
10276_at	YLR067C	PET309	-3.46474	5.20304	-4.10643	0.00106672	0.00466847	-1.33431
11183_at	YJL155C	FBP26	3.4631	10.1986	18.8877	2.29731e-11	8.93559e-09	16.4237
4412_at	YHR119W	SET1	-3.46304	5.89105	-2.11797	0.0525367	0.117514	-5.14471
2912_at	NA	NA	-3.46209	4.38819	-9.00914	3.32334e-07	1.33721e-05	6.93751
8902_at	YNL039W	BDP1	-3.46059	6.17651	-6.01018	3.18605e-05	0.000352809	2.25049
9945_at	YLR366W	NA	3.45513	4.32358	10.3142	6.30598e-08	3.75627e-06	8.63285
2760_at	NA	NA	-3.45443	4.22082	-8.04098	1.28246e-06	3.56301e-05	5.55318
8536_at	YOR018W	ROD1	-3.4458	6.33784	-4.76722	0.000299797	0.00177576	-0.0455718
6653_at	YDL167C	NRP1	-3.44577	5.22196	-7.93226	1.50271e-06	3.92935e-05	5.39042
2947_s_at	NA	NA	-3.44275	4.39046	-3.48357	0.00364811	0.0126705	-2.56849
8008_at	YPL242C	IQG1	-3.44261	3.35894	-11.5525	1.50653e-08	1.18092e-06	10.0823
8435_at	YOR098C	NUP1	-3.43949	5.25799	-7.37486	3.46567e-06	7.4032e-05	4.53167
4825_at	YGR170W	PSD2	-3.43712	4.87704	-4.89135	0.000237496	0.00149395	0.192098
6455_s_at	YDR039C	ENA1orENA2orENA5	-3.43648	4.38334	-8.11291	1.15569e-06	3.31036e-05	5.66003
7642_at	YPR111W	DBF20	-3.43312	4.34683	-14.5567	7.47321e-10	1.16271e-07	13.0753
10379_at	YLL051C	FRE6	-3.43215	5.29976	-6.36635	1.74248e-05	0.000229422	2.87077
5157_at	YGL131C	SNT2	-3.42548	5.67371	-3.61074	0.00283363	0.0102289	-2.31641
6621_at	YDL154W	MSH5	-3.42377	8.12453	-5.29727	0.000112385	0.000854327	0.9572
11037_at	YJL030W	MAD2	3.42294	5.41093	8.592	5.869e-07	2.01423e-05	6.35509
9007_at	YNL161W	CBK1	-3.41508	9.20777	-6.03744	3.04036e-05	0.000339784	2.29858
9724_at	YML075C	HMG1	-3.41335	6.68455	-4.91304	0.000228064	0.00145521	0.233469
7139_at	YBR229C	ROT2	-3.41302	6.02507	-4.09089	0.00109962	0.00477661	-1.36499
11332_at	YAR019C	CDC15	-3.40629	5.37528	-5.71283	5.34448e-05	0.000500409	1.71928
5081_at	YGL071W	RCS1	-3.40486	8.31467	-5.55284	7.0953e-05	0.000618438	1.42855
8582_at	YOL025W	LAG2	-3.40423	7.31809	-6.83046	8.14754e-06	0.000134277	3.65256
8380_at	YOR178C	GAC1	-3.39281	6.004	-4.11005	0.00105922	0.00465965	-1.32717
3722_s_at	NA	NA	-3.39186	4.68094	-5.97833	3.36564e-05	0.000364904	2.19415
9336_at	YMR287C	MSU1	-3.3885	5.92082	-4.44934	0.000548924	0.00276834	-0.661166
7920_at	YPL150W	NA	-3.38575	5.09625	-9.67783	1.38837e-07	6.66275e-06	7.82925
8645_at	YOL098C	NA	-3.38383	6.50142	-5.2332	0.000126292	0.000935662	0.837749
4127_at	YIL044C	AGE2	3.38096	6.1845	8.0034	1.35447e-06	3.7079e-05	5.49708
2824_at	NA	NA	-3.3807	6.22335	-7.57778	2.54508e-06	5.98447e-05	4.84906
3798_s_at	NA	NA	-3.37227	7.16767	-5.25613	0.000121119	0.000905244	0.880559
10230_at	YLR111W	NA	3.37025	7.20929	7.06364	5.6225e-06	0.000101851	4.03409
2887_s_at	NA	NA	-3.36773	6.41334	-8.33032	8.46944e-07	2.59973e-05	5.97899
10360_at	YLL026W	HSP104	-3.34785	8.3726	-4.92251	0.000224068	0.00144268	0.251518
8961_at	YNL115C	NA	-3.34502	5.85572	-5.60993	6.41042e-05	0.00057046	1.53267
10057_at	YLR255C	NA	3.34472	6.60354	7.11047	5.22344e-06	9.65561e-05	4.1098
4846_at	YGR146C	NA	3.34235	7.91623	10.6476	4.23336e-08	2.72541e-06	9.03746
7875_at	YPL105C	NA	-3.34092	6.55575	-7.25849	4.14684e-06	8.25389e-05	4.34716
6204_at	YDR284C	DPP1	3.34042	6.38349	6.6441	1.10169e-05	0.00016593	3.34224
5268_at	YGL245W	GUS1	-3.3399	7.46337	-4.49502	0.000502877	0.00258642	-0.572144
4869_at	YGR124W	ASN2	3.33786	10.3575	13.2584	2.54596e-09	2.80674e-07	11.8631
10799_at	YKL213C	DOA1	-3.33625	7.16904	-4.04204	0.0012099	0.00514554	-1.46149
10867_s_at	YJR092W	BUD4	-3.33514	3.49704	-15.2454	4.05373e-10	7.25434e-08	13.6744
9531_at	YMR089C	YTA12	-3.33364	6.606	-6.19016	2.34348e-05	0.000283373	2.56613
5365_at	YFR023W	PES4	-3.3318	6.05559	-6.87656	7.56708e-06	0.00012682	3.72858
10619_at	YKL033W	NA	-3.33167	5.93113	-6.19725	2.31554e-05	0.000281453	2.57846
4850_at	YGR150C	NA	-3.329	5.52722	-3.59497	0.0029237	0.0105013	-2.34768
2761_at	NA	NA	-3.32871	3.90655	-6.14975	2.50985e-05	0.000298464	2.49564
5765_at	YEL025C	NA	-3.32281	4.53984	-5.45252	8.4902e-05	0.000703872	1.24453
3006_at	NA	NA	-3.31773	3.55112	-7.77308	1.90017e-06	4.79407e-05	5.14936
8910_at	YNL031C	HHT2orHHT1	3.31576	6.2849	7.06259	5.63182e-06	0.000101851	4.03238
10021_at	YLR306W	UBC12	3.31257	8.71251	8.375	7.95087e-07	2.49775e-05	6.04381
7611_at	YPR125W	NA	-3.31255	7.52039	-7.54396	2.6785e-06	6.21985e-05	4.79654
4243_at	YIL158W	NA	3.30554	4.60024	7.08489	5.43756e-06	9.97243e-05	4.06848
4952_at	YGR071C	NA	-3.30225	3.93041	-4.44652	0.000551901	0.00278036	-0.666661
8486_at	YOR058C	ASE1	-3.30223	6.04495	-6.36731	1.73968e-05	0.000229404	2.87242
6408_at	YDR084C	NA	3.3018	6.72627	7.03437	5.88816e-06	0.000104897	3.9866
8252_at	YOR276W	CAF20	3.29998	6.86289	6.79577	8.61516e-06	0.000139622	3.59516
9655_at	YML010W	SPT5	-3.29886	6.04227	-8.92521	3.72048e-07	1.43515e-05	6.82199
3789_s_at	YLL067C	YRF1-5orYRF1-4orYRF1-7orYRF1-6orYRF1-3orYRF1-2orYRF1-1	-3.29633	7.85796	-4.9056	0.000231253	0.00147053	0.219293
7203_at	YBR157C	ICS2	3.29598	5.09698	6.47561	1.4531e-05	0.000201257	3.05751
11368_at	YAL041W	CDC24	-3.29418	5.52566	-4.21964	0.000855571	0.00391892	-1.11123
3113_s_at	NA	NA	-3.2867	6.36285	-7.56916	2.57841e-06	6.02699e-05	4.83569
9369_at	YMR275C	BUL1	-3.28666	8.92756	-4.09335	0.00109434	0.00475961	-1.36013
10979_at	YJR050W	ISY1	3.28565	7.61752	7.20826	4.48324e-06	8.62908e-05	4.26695
7268_at	NA	NA	3.28228	3.79471	6.7815	8.81561e-06	0.000142131	3.57151
8900_at	YNL041C	COG6	-3.27757	8.3728	-4.32055	0.000703559	0.00336769	-0.913043
10977_at	YJR048W	CYC1	3.27697	5.6074	3.73878	0.00219854	0.00834623	-2.06236
9001_at	YNL121C	TOM70	-3.27482	7.43869	-4.2141	0.000864838	0.00395554	-1.12213
2548_at	NA	NA	-3.27265	6.93798	-4.24595	0.000812952	0.0037737	-1.05949
4796_at	YGR230W	BNS1	3.26982	3.84026	7.24568	4.23003e-06	8.34827e-05	4.32674
11354_at	YAL013W	DEP1	3.26129	7.98221	11.2997	1.99695e-08	1.46784e-06	9.79797
8532_at	YOR014W	RTS1	-3.25863	4.69746	-5.37299	9.7978e-05	0.000776263	1.09773
3005_at	NA	NA	-3.25769	3.49443	-7.63709	2.32777e-06	5.62946e-05	4.94079
4146_at	YIL025C	NA	3.25621	6.35986	7.18272	4.66524e-06	8.83367e-05	4.22603
2856_at	NA	NA	-3.25305	4.55624	-6.14289	2.53928e-05	0.000300814	2.48365
4505_at	YHR031C	RRM3	-3.25195	5.71125	-10.2998	6.41664e-08	3.79109e-06	8.61517
3015_at	NA	NA	-3.25045	5.47423	-4.94042	0.000216711	0.00140584	0.285612
4501_at	YHR027C	RPN1	-3.24762	3.89163	-5.48173	8.05677e-05	0.000677567	1.29824
9954_at	YLR373C	VID22	-3.24709	8.14557	-4.15748	0.000965594	0.00431696	-1.23363
11222_at	YJL204C	RCY1	-3.24414	6.78627	-4.67697	0.00035555	0.00199757	-0.219391
9949_at	YLR368W	MDM30	-3.24407	5.54438	-7.268	4.08623e-06	8.18561e-05	4.3623
6393_at	YDR069C	DOA4	-3.24405	5.93433	-4.79246	0.000285883	0.00171182	0.00288758
5010_at	YGL007W	NA	3.24365	7.59015	7.49246	2.89602e-06	6.62606e-05	4.71628
4995_at	YGR022C	NA	3.24334	5.36119	5.95488	3.50457e-05	0.000376036	2.1526
4555_at	YHL007C	STE20	-3.24079	3.82323	-11.7122	1.26405e-08	1.05357e-06	10.2591
4150_at	YIL068C	SEC6	-3.23978	8.15869	-3.0016	0.00951331	0.0278828	-3.51529
4987_at	YGR014W	MSB2	-3.23752	4.4686	-8.20528	1.01204e-06	2.99916e-05	5.79627
9360_at	YMR266W	NA	-3.23721	5.56056	-7.58076	2.53366e-06	5.97266e-05	4.85368
4196_at	YIL115C	NUP159	-3.23183	3.59418	-14.5162	7.75247e-10	1.16725e-07	13.0392
2613_s_at	NA	NA	-3.23084	4.26574	-4.30634	0.00072317	0.00343902	-0.940915
4133_at	YIL038C	NOT3	-3.22998	7.27095	-4.84288	0.000260054	0.00159187	0.0994875
7951_at	YPL207W	NA	-3.22269	5.41854	-3.6962	0.0023919	0.0089385	-2.14684
4421_at	YHR127W	NA	3.21964	7.83854	5.91616	3.74728e-05	0.000393929	2.08382
4124_at	YIL047C	SYG1	-3.20598	7.16393	-4.26447	0.000784265	0.00367341	-1.0231
4245_at	YIL156W	UBP7	-3.20498	3.49431	-8.85258	4.10484e-07	1.53275e-05	6.72134
9772_at	YML115C	VAN1	-3.2045	6.50199	-4.99976	0.000194076	0.001295	0.398307
4767_at	YGR247W	CPD1	3.20076	6.80183	9.02252	3.26429e-07	1.31914e-05	6.95585
10280_at	YLR071C	RGR1	-3.19952	3.99732	-6.15724	2.4781e-05	0.000295441	2.50872
10999_at	YJR021C	REC107	3.1995	7.64201	7.29048	3.94657e-06	8.05987e-05	4.39806
6558_i_at	YDL083C	RPS16AorRPS16B	3.19883	8.13271	7.42312	3.21877e-06	7.08906e-05	4.60766
11112_at	YJL090C	DPB11	-3.1942	8.90456	-4.89051	0.000237869	0.00149529	0.190495
9060_at	YNL199C	GCR2	-3.19363	5.22104	-10.3628	5.94661e-08	3.61528e-06	8.69248
8344_at	YOR188W	MSB1	-3.19269	4.91202	-8.14502	1.10346e-06	3.22575e-05	5.7075
8199_at	YOR355W	GDS1	-3.18579	4.91705	-6.65079	1.08973e-05	0.000164873	3.35346
10256_at	YLR092W	SUL2	-3.18554	4.65155	-6.25065	2.11578e-05	0.000264661	2.6712
2785_s_at	NA	NA	-3.18267	6.20629	-5.34433	0.000103192	0.000805429	1.04461
11096_at	YJL061W	NUP82	-3.18035	6.34466	-3.93872	0.00148188	0.0060487	-1.66592
7706_at	YPR042C	PUF2	-3.17979	5.49678	-3.70958	0.00232936	0.00876443	-2.1203
8575_at	YOL032W	NA	3.17044	4.9801	7.98407	1.39315e-06	3.75868e-05	5.46817
8220_at	YOR330C	MIP1	-3.17041	3.47488	-9.06823	3.07084e-07	1.26842e-05	7.01836
2842_at	NA	NA	-3.16458	5.90299	-9.28954	2.29174e-07	9.99692e-06	7.31756
3007_at	NA	NA	-3.16229	4.77894	-7.26054	4.13369e-06	8.2453e-05	4.35043
2648_at	NA	NA	-3.16037	4.6179	-5.84779	4.21971e-05	0.000428163	1.96187
2725_s_at	NA	NA	-3.15974	3.95668	-4.66563	0.000363272	0.00203184	-0.241275
5329_s_at	YFR031C-A	RPL2BorRPL2A	3.15582	10.2916	7.75188	1.96095e-06	4.93408e-05	5.11701
5397_at	YFL034W	NA	-3.15222	4.24457	-9.28586	2.30282e-07	9.99852e-06	7.31263
5045_at	YGL017W	ATE1	3.14937	7.65008	8.55155	6.20813e-07	2.11507e-05	6.29751
10355_at	YLL031C	GPI13	-3.14879	6.67321	-5.82127	4.41942e-05	0.000440762	1.91439
9628_at	YMR006C	PLB2	-3.14526	9.03744	-4.50912	0.000489478	0.00253286	-0.544695
10976_at	YJR047C	ANB1	3.14477	7.43001	6.31514	1.89839e-05	0.000243092	2.78266
2843_at	NA	NA	-3.14205	6.32644	-4.50208	0.000496126	0.00255875	-0.558406
10851_at	YJR149W	NA	-3.14012	8.30111	-7.41848	3.24165e-06	7.10568e-05	4.60037
9768_at	YML117W	NAB6	-3.13904	4.36132	-5.94671	3.55437e-05	0.000378807	2.13811
5713_at	YER013W	PRP22	-3.13765	4.18744	-4.8312	0.000265813	0.00161652	0.0771405
5186_at	YGL193C	NA	3.13726	6.74576	8.75387	4.69593e-07	1.66674e-05	6.58357
2196_s_at	NA	NA	-3.13445	4.13278	-12.3869	6.15323e-09	5.57673e-07	10.9822
8678_at	YOL110W	SHR5	3.13325	7.50906	7.11305	5.20233e-06	9.63894e-05	4.11397
7413_at	YBL039C	URA7	-3.12716	6.82093	-4.73224	0.000320249	0.001858	-0.112845
7919_at	YPL151C	PRP46	-3.12656	5.99417	-12.3647	6.29724e-09	5.65238e-07	10.9591
10201_at	YLR127C	APC2	-3.12393	4.93796	-3.43856	0.00398978	0.0136677	-2.65759
3891_s_at	NA	NA	-3.12335	3.57441	-5.94988	3.53493e-05	0.00037799	2.14374
5721_at	YER020W	GPA2	3.11661	11.5066	8.32568	8.52535e-07	2.59973e-05	5.97224
7384_at	YBL023C	MCM2	-3.11656	6.2993	-5.56563	6.93554e-05	0.000606211	1.45191
8606_at	YOL046C	NA	-3.11574	9.11566	-7.2185	4.41242e-06	8.54563e-05	4.28333
5617_at	YER088C	DOT6	-3.11531	6.0438	-5.28908	0.00011407	0.000862917	0.941963
11153_at	YJL141C	YAK1	-3.11378	9.70734	-7.42604	3.20441e-06	7.08906e-05	4.61225
2319_f_at	NA	NA	-3.11198	4.16772	-3.10843	0.00769533	0.0233169	-3.30728
7724_at	YPR017C	DSS4	3.11192	6.32484	7.93518	1.4963e-06	3.92358e-05	5.39482
7488_at	YBL098W	BNA4	-3.11097	5.85342	-7.23095	4.32787e-06	8.47647e-05	4.30322
6125_at	YDR339C	NA	3.10964	8.09163	9.22348	2.49958e-07	1.06546e-05	7.22883
10983_at	YJR054W	NA	-3.10742	5.81516	-6.6325	1.12274e-05	0.00016798	3.32277
4567_at	YHL041W	NA	3.10227	6.66908	8.80435	4.38314e-07	1.58591e-05	6.65417
10247_at	YLR083C	EMP70	-3.10205	7.49423	-4.24076	0.000821179	0.00380432	-1.06969
2823_at	NA	NA	-3.09818	5.36371	-9.56111	1.61151e-07	7.33828e-06	7.67719
3892_s_at	NA	NA	-3.09701	3.95468	-4.61287	0.000401567	0.00219286	-0.343319
4428_at	YHR092C	HXT4	-3.09291	8.76152	-8.47886	6.8709e-07	2.28256e-05	6.19352
2647_at	NA	NA	-3.09167	4.88677	-5.93302	3.63949e-05	0.0003852	2.1138
4383_at	YHR134W	WSS1	3.08816	5.98762	7.30798	3.84132e-06	7.99753e-05	4.42586
9661_at	YML008C	ERG6	3.08492	7.69182	4.64897	0.000374936	0.00208362	-0.273462
2885_s_at	NA	NA	-3.08038	5.21404	-6.19793	2.31284e-05	0.000281453	2.57966
8996_at	YNL126W	SPC98	-3.07836	3.34094	-11.3103	1.97345e-08	1.46208e-06	9.80992
8026_at	YPL269W	KAR9	-3.07661	3.9135	-11.5861	1.45169e-08	1.15333e-06	10.1197
10008_at	YLR338W	NA	-3.07498	6.01803	-8.00545	1.35043e-06	3.70772e-05	5.50015
3310_s_at	NA	NA	-3.07417	11.2535	-4.41827	0.0005827	0.00289489	-0.721807
10614_at	YKL038W	RGT1	-3.07194	3.50791	-3.15083	0.00707321	0.0217983	-3.22434
9523_at	YMR124W	NA	-3.07173	5.7689	-8.84153	4.16687e-07	1.54971e-05	6.70598
4808_at	YGR198W	NA	-3.06872	9.70367	-5.50034	7.79272e-05	0.00065952	1.33241
10169_at	YLR188W	MDL1	-3.06696	8.57727	-4.48617	0.000511473	0.00261192	-0.58937
6566_at	YDL077C	VAM6	-3.06622	6.89431	-4.80618	0.000278602	0.00167731	0.0292024
10343_at	YLR001C	NA	-3.06572	5.54141	-4.56446	0.000440364	0.00234903	-0.437167
10945_at	YJR061W	NA	-3.06469	5.60944	-6.48273	1.43608e-05	0.000200086	3.06963
2786_s_at	NA	NA	-3.06413	8.38774	-5.87519	4.02334e-05	0.000414089	2.01081
5115_at	YGL127C	SOH1	3.06039	7.19289	7.72581	2.03853e-06	5.07458e-05	5.07714
9205_at	YNL325C	FIG4	-3.05984	7.88259	-3.6367	0.00269133	0.00982541	-2.2649
2759_at	NA	NA	-3.05981	3.86299	-7.96109	1.44066e-06	3.82062e-05	5.43373
6606_at	YDL125C	HNT1	3.05793	9.36125	8.40555	7.6157e-07	2.43468e-05	6.08798
7401_at	YBL051C	PIN4	-3.05767	10.1437	-6.26465	2.06646e-05	0.000261033	2.69545
10609_at	YKL043W	PHD1	-3.05635	6.01524	-8.15806	1.08296e-06	3.17905e-05	5.72676
7726_at	YPR019W	CDC54	-3.04378	6.24627	-3.21054	0.00628116	0.0197756	-3.10726
6284_at	YDR182W	CDC1	3.04299	7.74098	6.81793	8.31331e-06	0.00013591	3.63185
11351_at	YAL016W	TPD3	-3.0389	3.9445	-6.19482	2.32507e-05	0.000281877	2.57424
6227_at	YDR262W	NA	3.03836	7.88039	6.42628	1.57696e-05	0.000214591	2.9734
5529_at	YER180C	ISC10	3.03823	5.93328	8.38982	7.78634e-07	2.47229e-05	6.06525
10989_at	YJR012C	NA	3.0377	7.17809	8.25891	9.374e-07	2.81371e-05	5.87488
10792_at	YKL220C	FRE2	-3.03457	7.1759	-3.33063	0.00494572	0.0163312	-2.87084
10504_at	YKR079C	TRZ1	-3.03173	5.24423	-4.64455	0.000378099	0.00209594	-0.282016
10630_at	YKL066W	NA	3.0295	7.97608	8.87889	3.96093e-07	1.49698e-05	6.75788
6076_at	YDR379W	RGA2	-3.02848	4.87793	-6.9178	7.08467e-06	0.000120777	3.79634
6472_at	YDR011W	SNQ2	-3.02356	3.42838	-9.77737	1.22398e-07	6.14295e-06	7.95776
4756_at	YGR236C	SPG1	3.02344	5.76805	7.77705	1.889e-06	4.77881e-05	5.15542
9372_at	YMR233W	NA	3.0202	4.72663	6.31537	1.89764e-05	0.000243092	2.78306
9669_at	YML041C	VPS71	3.01778	7.79517	7.10683	5.25336e-06	9.69173e-05	4.10393
6549_at	YDL049C	KNH1	3.01755	8.49124	6.94131	6.82417e-06	0.00011768	3.83487
2163_s_at	NA	NA	3.01648	10.0359	7.45264	3.07695e-06	6.92128e-05	4.65398
2198_at	NA	NA	-3.01534	4.99868	-4.05008	0.00119099	0.00509529	-1.44559
10032_at	YLR274W	CDC46	-3.01203	7.02176	-3.43742	0.00399885	0.0136838	-2.65985
10154_at	YLR174W	IDP2	3.00862	7.71977	5.87861	3.9995e-05	0.000413781	2.01691
6453_at	YDR038C	ENA1orENA2orENA5	-3.00688	3.60666	-7.42289	3.21988e-06	7.08906e-05	4.6073
5328_at	YFR031C	SMC2	-3.00558	8.44302	-2.91236	0.0113523	0.0322306	-3.68789
5768_at	YEL022W	GEA2	-3.00515	3.12579	-4.92209	0.000224246	0.00144268	0.250709
9932_at	YLR397C	AFG2	-3.00242	10.3009	-6.10694	2.69958e-05	0.000312595	2.42074
11193_at	YJL187C	SWE1	-3.00142	9.78877	-5.46672	8.27651e-05	0.000688602	1.27066
2321_at	NA	NA	-3.00052	9.75025	-5.48027	8.07784e-05	0.00067823	1.29557
7667_at	YPR091C	NA	-2.99927	7.19573	-4.46132	0.000536442	0.00271714	-0.6378
2283_s_at	NA	NA	-2.99827	3.52734	-5.19925	0.000134375	0.000979989	0.774252
5665_at	YER053C	PIC2	2.99812	6.74931	8.16149	1.07763e-06	3.1734e-05	5.73181
9583_at	YMR053C	STB2	-2.99594	4.2933	-5.38191	9.64125e-05	0.000769898	1.11423
5334_at	YFR035C	NA	2.99272	7.65793	7.87748	1.62853e-06	4.21117e-05	5.30784
10278_at	YLR069C	MEF1	-2.99104	8.22176	-4.83964	0.000261638	0.00159842	0.0932907
9120_at	YNL274C	NA	2.98861	10.5551	13.3487	2.33038e-09	2.62098e-07	11.9511
11118_at	YJL084C	NA	-2.98673	8.39062	-2.93154	0.0109296	0.031268	-3.65088
8634_at	YOL063C	NA	-2.98393	10.3803	-4.32059	0.000703508	0.00336769	-0.91297
3252_s_at	NA	NA	-2.98364	4.48919	-3.52326	0.00337129	0.0118669	-2.48985
7370_at	YBR011C	IPP1	2.98163	7.80916	5.34076	0.000103859	0.000807265	1.03801
2993_s_at	NA	NA	-2.97844	2.9382	-16.373	1.56775e-10	3.5695e-08	14.5965
10070_at	YLR265C	NEJ1	2.97725	7.19404	6.37112	1.72865e-05	0.000229218	2.87896
9921_at	YLR386W	VAC14	-2.97691	6.50886	-3.1344	0.00730809	0.0223529	-3.2565
7574_at	YPR176C	BET2	-2.97178	7.87177	-4.43551	0.000563698	0.00282758	-0.688141
4971_at	YGR045C	NA	2.97066	6.50806	5.70569	5.41213e-05	0.000505728	1.70637
7946_at	YPL169C	MEX67	-2.97031	10.0474	-6.43506	1.55412e-05	0.000211791	2.9884
10943_at	YJR059W	PTK2	-2.96809	7.51758	-3.43643	0.00400674	0.0137007	-2.66181
5020_at	YGR003W	CUL3	-2.96606	6.05718	-4.49178	0.000506012	0.00259577	-0.578461
2782_at	NA	NA	-2.96513	5.15216	-5.75295	4.98068e-05	0.00047638	1.79165
4129_at	YIL042C	NA	2.96384	10.7882	9.70203	1.34636e-07	6.55006e-06	7.86059
10468_at	YKR089C	NA	-2.9629	5.2268	-3.03432	0.00891541	0.0263989	-3.45173
5298_at	YGL262W	NA	2.96067	5.53188	7.97358	1.41463e-06	3.7947e-05	5.45246
6559_f_at	YDL083C	RPS16AorRPS16B	2.95964	8.49848	8.90876	3.80405e-07	1.45733e-05	6.79925
9500_at	YMR145C	NDE1	-2.95758	8.00976	-6.94748	6.75757e-06	0.000116818	3.84496
6454_g_at	YDR038C	ENA1orENA2orENA5	-2.95487	5.85791	-9.27514	2.33542e-07	1.00551e-05	7.29827
6194_at	YDR274C	NA	2.95446	8.11888	6.34457	1.80709e-05	0.00023462	2.83333
3441_f_at	NA	NA	-2.95365	5.03214	-4.45149	0.000546661	0.00275991	-0.65697
10903_at	YJR110W	YMR1	-2.9531	5.99989	-6.53702	1.31304e-05	0.000190034	3.16175
2742_s_at	NA	NA	-2.94777	3.39608	-5.01869	0.000187381	0.00126296	0.434184
9317_at	YMR309C	NIP1	-2.94771	5.24746	-5.49671	7.84355e-05	0.00066262	1.32574
10317_at	YLR021W	NA	2.94499	6.00327	4.95437	0.000211156	0.00138035	0.312135
5008_at	YGL009C	LEU1	-2.94221	7.8402	-3.37625	0.00451644	0.0151331	-2.78078
5699_at	YER044C	ERG28	2.93985	4.92191	9.15081	2.75149e-07	1.1518e-05	7.13066
6714_at	YDL239C	ADY3	-2.93935	8.77687	-4.75209	0.000308474	0.00180841	-0.0746598
10795_at	YKL217W	JEN1	-2.93457	6.23312	-6.50972	1.37347e-05	0.000195746	3.11547
8980_at	YNL097C	PHO23	2.93194	6.25958	5.43983	8.68598e-05	0.000715023	1.22116
6373_g_at	NA	NA	2.92619	8.05965	7.02607	5.96585e-06	0.000106079	3.97312
6229_at	YDR264C	AKR1	-2.9239	7.05318	-6.06456	2.90235e-05	0.000328804	2.34632
9528_at	YMR129W	POM152	-2.92193	3.74848	-4.9949	0.000195832	0.00130347	0.389103
7912_at	YPL158C	NA	-2.92156	7.11387	-4.70841	0.000335004	0.00191856	-0.158749
11377_at	YAL034C	FUN19	-2.92128	5.6489	-6.36724	1.73988e-05	0.000229404	2.8723
4448_at	YHR067W	HTD2	2.91968	4.65452	6.40896	1.62301e-05	0.000218311	2.9438
8573_at	YOL034W	SMC5	-2.91941	4.77391	-8.27812	9.12109e-07	2.75229e-05	5.90295
5027_at	YGL035C	MIG1	-2.91797	4.85372	-7.9155	1.54007e-06	4.0158e-05	5.3652
8704_at	YOL130W	ALR1	-2.91738	6.50176	-4.76489	0.000301118	0.00178133	-0.0500549
10745_at	YKL174C	TPO5	-2.91635	6.26585	-6.39146	1.67101e-05	0.000223735	2.91383
9752_at	YML093W	UTP14	-2.91416	5.32299	-4.82934	0.000266742	0.00161691	0.0735778
6285_at	YDR183W	PLP1	2.91174	5.64124	5.83706	4.29937e-05	0.000433213	1.94267
9171_at	YNL313C	NA	-2.91126	8.22392	-3.93992	0.0014784	0.00604331	-1.66355
9802_at	YML130C	ERO1	-2.91108	5.10421	-3.70519	0.0023497	0.00882674	-2.12901
10482_at	YKR101W	SIR1	-2.90856	7.85243	-5.65369	5.93227e-05	0.000539219	1.61221
5089_at	YGL063W	PUS2	2.90736	11.0764	10.0524	8.68373e-08	4.76839e-06	8.30741
7854_i_at	YPL081W	RPS9A	-2.90617	7.96596	-8.10841	1.16323e-06	3.31227e-05	5.65335
3916_s_at	NA	NA	-2.90422	6.10433	-4.2409	0.000820955	0.00380432	-1.06941
4909_f_at	YGR118W	RPS23A	2.90115	7.44419	7.25408	4.17529e-06	8.29284e-05	4.34013
7649_at	YPR117W	NA	-2.89993	4.03112	-2.20914	0.0443176	0.101747	-4.98743
5407_at	YFL023W	BUD27	-2.89935	6.78059	-6.41248	1.61354e-05	0.000217954	2.94982
9610_at	YMR032W	HOF1	-2.89444	6.56891	-4.85732	0.000253111	0.00156269	0.127102
4822_at	YGR167W	CLC1	2.88701	7.05003	6.18376	2.36904e-05	0.000285355	2.55498
7067_at	YBR294W	SUL1	-2.88611	6.10541	-6.4396	1.54246e-05	0.000210763	2.99615
7336_at	YBR023C	CHS3	-2.88326	8.02569	-2.71204	0.0168437	0.0448476	-4.07042
5649_at	YER076C	NA	2.88302	10.26	5.81239	4.48845e-05	0.000445904	1.89848
9163_at	YNL321W	NA	-2.88235	6.02125	-5.26597	0.000118968	0.000892018	0.898913
3035_at	NA	NA	-2.88214	5.1581	-6.09712	2.74523e-05	0.00031599	2.40351
6518_at	YDL034W	NA	-2.88198	3.51504	-12.319	6.60569e-09	5.81737e-07	10.9111
9578_at	YMR047C	NUP116	-2.88171	5.90663	-3.72456	0.00226127	0.00853578	-2.09057
9544_at	YMR102C	NA	-2.88075	8.089	-3.94583	0.00146131	0.00599091	-1.65183
9656_g_at	YML010W	SPT5	-2.88053	7.83443	-11.0263	2.72447e-08	1.88911e-06	9.48394
4759_at	YGR239C	PEX21	2.87513	7.28832	5.27075	0.000117937	0.000885715	0.907819
11095_at	YJL062W	LAS21	-2.87379	7.80507	-3.25289	0.00577347	0.0185612	-3.02402
8622_at	YOL076W	MDM20	-2.87303	5.96499	-2.8512	0.0128103	0.0355798	-3.80545
9115_at	YNL233W	BNI4	-2.87126	5.84152	-5.56688	6.92013e-05	0.000605431	1.45419
11205_i_at	YJL177W	RPL17B	2.87083	8.8323	8.08696	1.19983e-06	3.39408e-05	5.62155
8521_at	YOR048C	RAT1	-2.86534	6.13485	-3.61143	0.00282971	0.0102187	-2.31503
4377_at	YHR172W	SPC97	-2.86282	4.47898	-6.67392	1.04943e-05	0.000160597	3.39223
6933_at	YCL043C	PDI1	2.86279	9.72128	3.97551	0.00137852	0.00571679	-1.59307
2458_g_at	NA	NA	2.86188	8.8158	7.39961	3.33665e-06	7.22683e-05	4.57068
6605_at	YDL125C	HNT1	2.86094	8.24822	7.30127	3.88132e-06	8.01595e-05	4.41521
6054_at	YDR403W	DIT1	-2.85714	7.55498	-5.14298	0.00014898	0.00105839	0.668675
7714_at	YPR049C	ATG11	-2.85628	4.07453	-6.35341	1.78056e-05	0.000232469	2.84854
9580_at	YMR049C	ERB1	-2.85262	7.39717	-6.73687	9.47494e-06	0.000148653	3.49732
7760_at	YPR008W	HAA1	-2.85196	8.17554	-7.73528	2.00999e-06	5.04389e-05	5.09163
10988_at	YJR011C	NA	2.85027	5.83056	10.1823	7.4029e-08	4.18825e-06	8.46979
6310_at	YDR164C	SEC1	-2.84995	8.65015	-4.74926	0.000310127	0.00181393	-0.0801078
9982_at	YLR357W	RSC2	-2.84536	9.24097	-4.55276	0.000450301	0.00239141	-0.459865
10365_at	YLL021W	SPA2	-2.84364	3.68847	-2.54867	0.0231647	0.0587295	-4.37615
11431_at	NA	NA	-2.84274	3.97438	-4.78319	0.000290916	0.00173306	-0.0149095
6361_at	YDR126W	SWF1	2.84246	6.61219	5.47626	8.13612e-05	0.000681675	1.2882
5169_at	YGL166W	CUP2	2.84112	7.19109	5.32155	0.000107539	0.000827597	1.00234
9674_at	YML035C-A	NA	-2.84043	8.08981	-6.03694	3.04295e-05	0.000339784	2.2977
6380_at	YDR100W	NA	2.83945	4.85269	8.86046	4.06115e-07	1.52252e-05	6.73229
5230_at	YGL238W	CSE1	-2.83868	3.57351	-4.18293	0.000918883	0.00414786	-1.18347
11181_at	YJL157C	FAR1	-2.8369	7.21445	-7.62351	2.37575e-06	5.70307e-05	4.91982
7367_at	YBR008C	FLR1	-2.83562	5.61099	-6.06224	2.91385e-05	0.000329707	2.34225
4314_at	YHR200W	RPN10	2.83529	8.61375	5.30722	0.000110371	0.000842448	0.975718
8511_at	YOR038C	HIR2	-2.83133	7.16546	-5.68624	5.60083e-05	0.00051733	1.6712
5545_at	YER151C	UBP3	-2.83057	3.34009	-13.9231	1.34235e-09	1.62739e-07	12.4979
4862_at	YGR161C	RTS3	2.82821	5.83279	5.33564	0.000104828	0.000811945	1.02849
6337_at	YDR146C	SWI5	-2.82811	4.61858	-9.48717	1.77234e-07	7.91619e-06	7.58008
9037_at	YNL176C	NA	-2.82247	6.38748	-5.69289	5.53554e-05	0.000513622	1.68324
11208_at	YJL175W	NA	-2.82032	9.35801	-6.99065	6.30984e-06	0.000111136	3.91547
5090_at	YGL062W	PYC1	-2.81846	4.90053	-4.51608	0.000483004	0.00251329	-0.531158
10991_at	YJR014W	NA	2.81501	5.89778	6.10634	2.70235e-05	0.000312595	2.41969
9584_at	YMR054W	STV1	-2.81316	8.05528	-2.73246	0.0161824	0.0433945	-4.03178
7776_at	YPL022W	RAD1	-2.81193	5.31857	-3.65227	0.0026095	0.00955282	-2.23401
3355_s_at	NA	NA	-2.81161	5.09614	-5.82748	4.3718e-05	0.000437292	1.92552
11203_i_at	YJL177W	RPL17AorRPL17B	2.81005	7.18919	6.00107	3.2364e-05	0.000354759	2.23438
10659_at	YKL081W	TEF4	2.80697	9.38654	8.83044	4.23019e-07	1.56702e-05	6.69054
4470_at	YHR041C	SRB2	2.80589	9.0124	5.73958	5.09896e-05	0.000483237	1.76755
7775_at	YPL023C	MET12	-2.80568	7.90111	-3.91629	0.00154873	0.0062532	-1.71034
8666_at	YOL123W	HRP1	-2.80389	5.72257	-5.78715	4.69093e-05	0.00045662	1.85318
6386_at	YDR106W	ARP10	2.80281	10.1955	9.54735	1.64023e-07	7.43279e-06	7.65916
9106_at	YNL243W	SLA2	-2.79862	7.01493	-3.02209	0.00913444	0.026916	-3.47551
5061_at	YGL046W	RIM8	2.79751	5.26955	9.56953	1.59422e-07	7.29512e-06	7.6882
2726_s_at	NA	NA	-2.79603	4.67749	-4.38894	0.000616556	0.00303083	-0.779139
5608_at	YER123W	YCK3	-2.79433	7.80445	-8.7422	4.77157e-07	1.66826e-05	6.5672
5758_at	YEL032W	MCM3	-2.78343	6.088	-4.90851	0.000230003	0.00146458	0.224827
4039_at	NA	NA	-2.7834	7.01036	-5.51906	7.53615e-05	0.000644231	1.36674
11189_at	YJL149W	NA	-2.78032	7.27347	-7.21913	4.40808e-06	8.54563e-05	4.28434
4068_at	YIR032C	DAL3	2.7777	9.71204	5.21272	0.000131105	0.000963673	0.799462
5780_at	YEL055C	POL5	-2.77758	6.4262	-3.30935	0.00515974	0.0169361	-2.91282
4234_at	YIL122W	POG1	2.77675	7.44689	3.96654	0.00140303	0.00579091	-1.61083
3588_f_at	NA	NA	-2.7759	5.95459	-4.97747	0.000202275	0.00133539	0.356031
8028_at	YPL267W	NA	2.7698	5.52882	7.33756	3.67014e-06	7.70743e-05	4.47273
10310_at	YLR014C	PPR1	-2.7689	5.61076	-3.05915	0.00848667	0.0253514	-3.4034
7572_at	YPR174C	NA	2.76636	4.54193	6.60157	1.18101e-05	0.000174718	3.27074
8421_at	YOR129C	NA	-2.7652	8.85152	-4.22809	0.00084164	0.0038703	-1.09461
2780_at	NA	NA	-2.76289	6.71809	-4.78655	0.000289081	0.00172543	-0.00845458
6691_at	YDL217C	TIM22	2.76289	5.80807	6.14661	2.52327e-05	0.0002996	2.49015
5037_at	YGL025C	PGD1	-2.76283	5.06084	-11.5832	1.45631e-08	1.15333e-06	10.1165
5114_at	YGL083W	SCY1	-2.76262	8.04481	-5.58343	6.71931e-05	0.000590629	1.4844
11370_at	YAL039C	CYC3	2.76218	8.72502	4.2329	0.000833817	0.00384759	-1.08515
7170_at	YBR168W	PEX32	2.75394	8.37754	13.9539	1.30402e-09	1.62307e-07	12.5265
10655_at	YKL084W	HOT13	2.75343	6.34352	8.58691	5.91057e-07	2.02107e-05	6.34786
5344_at	YFR002W	NIC96	-2.75141	5.13829	-5.3387	0.000104248	0.00080894	1.03418
10708_at	YKL121W	NA	-2.75139	7.15679	-2.67674	0.018049	0.0476088	-4.13699
10707_at	YKL122C	SRP21	2.75123	5.48098	8.48735	6.78982e-07	2.26368e-05	6.20569
6521_at	YDL031W	DBP10	-2.74944	7.98151	-3.33986	0.00485575	0.0160682	-2.85264
5584_at	YER144C	UBP5	-2.74835	6.47473	-4.72187	0.000326584	0.00188305	-0.132811
4042_at	NA	NA	-2.74789	5.72055	-7.72666	2.03594e-06	5.07458e-05	5.07845
8922_at	YNL066W	SUN4	2.74741	7.04357	4.85985	0.000251912	0.00155632	0.131946
6693_at	YDL215C	GDH2	-2.7442	8.88885	-3.36336	0.00463383	0.0154876	-2.80625
9963_at	YLR382C	NAM2	-2.74221	7.64323	-4.13638	0.00100614	0.00447039	-1.27521
10051_at	YLR291C	GCD7	2.74213	8.93658	5.08195	0.000166694	0.0011484	0.553771
9864_at	YLR460C	NA	2.73925	11.648	13.863	1.42083e-09	1.70045e-07	12.4417
6050_at	YDR399W	HPT1	2.73657	5.44866	5.864	4.10234e-05	0.000420098	1.99084
4813_at	YGR203W	NA	2.73498	5.62543	5.79375	4.63705e-05	0.000455651	1.86504
11104_at	YJL098W	SAP185	-2.73288	6.11031	-5.82811	4.36695e-05	0.000437292	1.92665
5219_at	YGL206C	CHC1	-2.73137	3.37083	-5.97073	3.40999e-05	0.000368856	2.1807
11408_f_at	NA	NA	-2.72882	8.23321	-4.71016	0.000333898	0.0019151	-0.15538
11157_at	YJL137C	GLG2	2.72875	9.34282	12.9775	3.36488e-09	3.49013e-07	11.5854
2714_s_at	NA	NA	-2.7266	9.8992	-4.75893	0.000304517	0.00179461	-0.0614999
9020_at	YNL148C	ALF1	2.7259	6.73393	4.16903	0.000944098	0.00423709	-1.21086
2646_at	NA	NA	-2.72492	4.04722	-4.42703	0.000572964	0.0028587	-0.704699
2235_at	NA	NA	-2.72408	6.87487	-3.36024	0.00466266	0.0155728	-2.8124
4258_at	YIL143C	SSL2	-2.72331	9.0793	-4.2584	0.000793551	0.00370575	-1.03503
7147_at	NA	NA	2.72147	9.068	5.9633	3.45399e-05	0.000372723	2.16753
3013_at	NA	NA	-2.72098	5.30169	-3.97112	0.00139047	0.00575869	-1.60177
10571_at	YKR008W	RSC4	-2.71693	4.30285	-6.94054	6.83261e-06	0.00011768	3.8336
11000_at	YJR022W	LSM8	2.71625	8.64481	8.04429	1.27632e-06	3.55754e-05	5.5581
9472_at	YMR160W	NA	-2.71617	9.5402	-3.81235	0.00190094	0.00740001	-1.91639
7780_at	YPL018W	CTF19	2.71404	8.19181	6.75565	9.19135e-06	0.000146287	3.52857
2358_at	NA	NA	-2.71383	6.16016	-4.93846	0.000217506	0.00141001	0.281874
3718_s_at	NA	NA	-2.71309	3.75362	-6.48678	1.42649e-05	0.000199729	3.07652
10024_at	YLR309C	IMH1	-2.71254	6.74525	-2.97903	0.00994856	0.0289096	-3.55905
10163_at	YLR182W	SWI6	-2.70902	6.07991	-4.75018	0.000309589	0.00181192	-0.0783378
11392_at	YAL056W	GPB2	-2.70847	6.03097	-3.62893	0.00273318	0.00994319	-2.28033
11347_at	YAL020C	ATS1	2.70784	8.07841	5.19264	0.00013601	0.00099044	0.761872
6334_at	YDR143C	SAN1	-2.70777	8.63646	-6.55038	1.28448e-05	0.000187061	3.18436
10484_at	YKR103W	NFT1	-2.70438	5.51146	-3.04514	0.00872605	0.0259281	-3.43068
6947_g_at	NA	NA	-2.70361	10.3096	-4.3072	0.000721958	0.003435	-0.939214
6426_at	YDR057W	YOS9	-2.70317	7.35844	-6.20235	2.29562e-05	0.000279759	2.58734
3544_at	YBL108W	NA	2.69682	7.18513	7.16802	4.77353e-06	8.98406e-05	4.20243
5076_f_at	YGL076C	RPL7A	2.69594	5.47013	5.80058	4.58205e-05	0.00045215	1.87729
9519_at	YMR120C	ADE17	-2.69541	9.08574	-7.22489	4.36883e-06	8.49646e-05	4.29354
4431_at	YHR095W	NA	2.695	6.96706	5.57828	6.78117e-05	0.000595505	1.475
6298_at	YDR196C	NA	2.69405	8.68756	8.0441	1.27668e-06	3.55754e-05	5.55782
10142_at	YLR204W	QRI5	2.69258	5.45269	7.56241	2.60481e-06	6.06382e-05	4.82522
8187_at	YOR343C	NA	2.68517	6.98935	8.53589	6.34497e-07	2.14603e-05	6.27516
2339_at	NA	NA	-2.68484	3.29407	-7.66413	2.23527e-06	5.46238e-05	4.98246
5015_at	YGL002W	ERP6	2.6848	5.76647	6.66458	1.06551e-05	0.000162525	3.37659
9491_at	YMR137C	PSO2	-2.68441	5.51891	-4.01142	0.00128472	0.00540464	-1.52202
11171_at	YJL167W	ERG20	2.68148	10.0276	8.00959	1.34231e-06	3.69631e-05	5.50634
4118_at	YIL009W	FAA3	-2.68065	7.61074	-4.62986	0.000388797	0.00214007	-0.310422
11235_at	YJL191W	RPS14BorRPS14A	2.68018	7.83999	9.81422	1.16848e-07	5.89606e-06	8.00506
9792_s_at	NA	NA	-2.68007	5.18189	-3.69479	0.00239859	0.00895634	-2.14964
2508_s_at	NA	NA	-2.67945	4.95363	-2.99132	0.0097091	0.0283107	-3.53522
2886_s_at	NA	NA	-2.67888	6.23343	-5.75672	4.94782e-05	0.000473722	1.79844
7779_at	YPL019C	VTC3	-2.6744	7.82431	-2.84961	0.0128505	0.0356598	-3.8085
10483_at	YKR102W	FLO10	-2.67397	4.92434	-5.71752	5.30058e-05	0.00049779	1.72775
8423_at	YOR131C	NA	2.67386	6.70204	7.0667	5.59554e-06	0.000101821	4.03903
8976_at	YNL101W	AVT4	-2.67315	5.21677	-3.79629	0.00196221	0.00759734	-1.94825
7391_at	YBL016W	FUS3	2.67128	9.86245	6.27399	2.03423e-05	0.000258713	2.71161
11154_at	YJL140W	RPB4	2.66961	4.27819	8.07491	1.22093e-06	3.43295e-05	5.60366
11158_i_at	YJL136C	RPS21B	2.66511	9.38158	5.80654	4.53453e-05	0.000448613	1.88799
6638_at	YDL137W	ARF2	2.66487	9.14323	6.04448	3.00391e-05	0.00033715	2.31097
4034_at	YIR020W-B	NA	2.66039	6.01745	5.87752	4.00705e-05	0.000413781	2.01498
6421_at	YDR052C	DBF4	-2.65956	5.43763	-4.97475	0.000203301	0.00134026	0.350863
11204_s_at	YJL177W	RPL17AorRPL17B	2.65924	8.85891	6.68713	1.02713e-05	0.000157497	3.41432
3309_s_at	NA	NA	-2.65236	5.47234	-6.085	2.80263e-05	0.000321003	2.38224
4948_at	YGR067C	NA	-2.65228	9.69232	-5.81315	4.48253e-05	0.000445904	1.89983
5430_at	YFL050C	ALR2	-2.65077	5.87371	-5.27084	0.000117917	0.000885715	0.907994
10885_at	YJR137C	ECM17	-2.64913	3.86163	-5.41783	9.03665e-05	0.000737387	1.1806
8457_at	YOR076C	SKI7	-2.64859	8.07743	-4.87658	0.000244147	0.00152144	0.163903
5921_at	YDR525W-A	SNA2	2.6477	4.96165	7.40599	3.30423e-06	7.17325e-05	4.58072
4390_at	YHR140W	NA	2.64594	6.54901	6.91921	7.06868e-06	0.000120777	3.79866
6250_at	YDR239C	NA	-2.64328	9.20465	-4.09319	0.00109468	0.00475961	-1.36044
8171_at	YOR372C	NDD1	-2.64313	5.28005	-5.75787	4.93781e-05	0.00047325	1.80052
8647_at	YOL096C	COQ3	2.63936	9.82071	8.35094	8.22584e-07	2.55149e-05	6.00893
11001_at	YJR023C	NA	2.63618	8.34238	6.94995	6.73108e-06	0.000116576	3.849
4359_at	YHR154W	RTT107	-2.63596	4.86763	-2.61909	0.0202	0.052307	-4.24514
10344_at	YLR002C	NOC3	-2.63444	8.14644	-3.16744	0.00684343	0.0211815	-3.19181
10222_at	YLR103C	CDC45	-2.63342	7.76498	-5.01972	0.000187023	0.00126252	0.436137
10963_at	YJR079W	BNA2	2.63165	8.64689	7.78597	1.86419e-06	4.72886e-05	5.169
5257_at	YGL256W	ADH4	-2.63103	6.00908	-7.80441	1.81396e-06	4.62658e-05	5.19706
2159_at	NA	NA	-2.62923	4.39701	-8.74573	4.74855e-07	1.66674e-05	6.57215
9091_at	YNL212W	VID27	-2.62853	7.2201	-4.40511	0.000597643	0.00295688	-0.747515
9173_at	YNL311C	NA	-2.6265	5.0348	-5.80628	4.53659e-05	0.000448613	1.88752
10686_at	YKL098W	NA	2.6259	11.0539	8.74827	4.7321e-07	1.66674e-05	6.57571
2844_at	NA	NA	-2.62477	5.38334	-5.64756	5.99693e-05	0.000544566	1.60108
2927_s_at	NA	NA	-2.62095	5.3301	-4.07233	0.00114026	0.004912	-1.40164
2918_s_at	NA	NA	-2.62027	5.76297	-5.40947	9.17381e-05	0.000745757	1.16516
7455_at	YBL086C	NA	2.61977	10.0612	10.9172	3.08951e-08	2.07486e-06	9.35667
4896_at	YGR106C	NA	2.61754	5.80254	7.41828	3.24265e-06	7.10568e-05	4.60006
4108_at	YIL016W	SNL1	2.61678	4.41179	6.39945	1.64892e-05	0.000221159	2.92752
8861_at	YNR013C	PHO91	-2.61673	7.01228	-3.65436	0.00259873	0.00952084	-2.22987
6119_at	YDR333C	NA	-2.61168	10.3946	-3.59215	0.00294016	0.0105482	-2.35328
5615_at	YER087W	NA	2.61148	7.31268	4.58733	0.000421576	0.00227349	-0.392805
11150_at	YJL143W	TIM17	2.61002	6.00176	8.27667	9.1399e-07	2.75229e-05	5.90083
5569_at	YER129W	NA	-2.60953	5.41479	-4.68482	0.000350302	0.00198186	-0.204243
4486_at	YHR058C	MED6	2.60946	8.42613	8.46795	6.9767e-07	2.29883e-05	6.17785
9641_at	YMR019W	STB4	-2.60828	8.48958	-4.3906	0.000614583	0.00302432	-0.775885
4284_at	YIL167W	SDL1	2.60381	7.89424	5.95549	3.50087e-05	0.000376036	2.15368
4337_at	YHR177W	NA	2.60341	8.22649	3.07422	0.00823651	0.0246989	-3.37404
5384_at	YFL004W	VTC2	-2.60168	6.19558	-5.43582	8.7489e-05	0.000718934	1.21376
9904_at	YLR413W	NA	-2.60157	4.72331	-5.47985	8.08394e-05	0.00067823	1.29479
8437_at	YOR100C	CRC1	2.60026	9.28681	7.19345	4.58786e-06	8.74034e-05	4.24323
4151_at	YIL067C	NA	-2.59876	7.95111	-4.34269	0.000674089	0.00325205	-0.869652
8027_at	YPL268W	PLC1	-2.59756	8.44811	-3.51	0.00346139	0.0121246	-2.51614
11385_s_at	YAL063C	FLO5orFLO9orFLO1	-2.59534	7.48543	-3.34207	0.00483437	0.0160088	-2.84827
5747_at	YEL043W	NA	-2.59431	9.74047	-3.10079	0.00781295	0.0236185	-3.32219
10060_at	YLR258W	GSY2	-2.593	9.46367	-3.47915	0.00368032	0.0127669	-2.57724
9087_at	YNL216W	RAP1	-2.59036	5.54449	-3.7332	0.00222297	0.00842867	-2.07344
8276_at	YOR255W	OSW1	2.58768	5.82796	6.12995	2.59579e-05	0.000305186	2.46103
4502_at	YHR028C	DAP2	-2.58626	6.06876	-5.0783	0.000167821	0.00115361	0.546883
9753_at	YML092C	PRE8	2.58598	7.18308	6.81226	8.38949e-06	0.000136677	3.62246
10096_at	YLR248W	RCK2	-2.58213	7.0067	-5.84298	4.25522e-05	0.000430363	1.95327
9110_at	YNL238W	KEX2	-2.58159	5.41317	-4.82765	0.000267592	0.00162101	0.0703324
4422_at	YHR128W	FUR1	2.57894	8.00995	10.2161	7.10349e-08	4.05296e-06	8.51178
3556_s_at	NA	NA	-2.57883	6.66636	-3.7739	0.002051	0.00787257	-1.99268
10767_at	YKL195W	MIA40	-2.57715	7.33057	-9.21928	2.51346e-07	1.06651e-05	7.22317
8449_at	YOR112W	NA	-2.57706	11.1154	-4.23432	0.000831518	0.00383888	-1.08236
10038_i_at	YLR280C	NA	2.57566	8.88056	5.90594	3.81423e-05	0.00039939	2.06563
10318_at	YLR022C	NA	2.57556	5.10115	7.29632	3.9111e-06	8.02419e-05	4.40735
9420_i_at	YMR194W	RPL36A	2.57424	10.5806	6.91732	7.09009e-06	0.000120777	3.79555
6623_at	YDL152W	NA	-2.57398	8.9102	-5.93977	3.59725e-05	0.000382028	2.12579
5071_at	YGL080W	NA	2.57133	4.3853	6.5301	1.32809e-05	0.000191619	3.15002
6216_at	YDR251W	PAM1	-2.57125	7.34913	-4.02273	0.00125656	0.00529811	-1.49967
6601_at	YDL129W	NA	2.57027	7.28409	6.20803	2.27364e-05	0.000278536	2.59723
6123_at	YDR337W	MRPS28	2.57023	6.95486	5.17324	0.000140932	0.00101826	0.725496
10147_at	YLR167W	RPS31	2.56709	4.97353	4.58204	0.000425847	0.00228859	-0.403062
5670_i_at	YER056C-A	RPL34BorRPL34A	2.567	6.49997	4.06881	0.00114812	0.0049347	-1.40858
9920_at	YLR385C	SWC7	2.56666	4.97215	5.36597	9.92296e-05	0.000780669	1.08472
4571_at	YHL037C	NA	2.56613	5.77072	7.08774	5.41332e-06	9.94751e-05	4.07308
10698_at	YKL130C	SHE2	2.56547	6.83854	8.01241	1.33682e-06	3.69207e-05	5.51055
7851_at	YPL084W	BRO1	-2.5624	5.76972	-5.42492	8.92208e-05	0.000729494	1.19367
8162_at	YOR363C	PIP2	-2.56092	6.42609	-2.37433	0.0324078	0.0782328	-4.69461
11124_at	YJL125C	GCD14	2.56051	10.0998	12.2065	7.43525e-09	6.48674e-07	10.7925
9607_at	YMR030W	RSF1	-2.55803	4.47509	-4.28085	0.000759759	0.00358562	-0.990938
5426_at	YFL054C	NA	-2.55701	8.17965	-2.67182	0.0182237	0.0480019	-4.14626
10912_at	YJR119C	NA	-2.55684	5.84909	-2.49026	0.025937	0.064652	-4.48382
6859_at	YCR025C	NA	2.55615	7.31424	7.2892	3.95439e-06	8.05987e-05	4.39603
6402_at	YDR078C	SHU2	2.556	9.00879	6.12607	2.613e-05	0.000306437	2.45424
10211_at	YLR137W	NA	2.5555	10.7223	9.91427	1.03083e-07	5.346e-06	8.13278
4342_at	YHR182W	NA	-2.55543	9.70757	-4.55395	0.000449285	0.00238843	-0.457568
4988_at	YGR015C	NA	2.55504	8.65363	6.99891	6.22785e-06	0.000110108	3.92892
2612_g_at	NA	NA	-2.55482	4.45351	-4.34383	0.000672604	0.00324819	-0.867415
3307_s_at	NA	NA	-2.5541	6.84292	-3.87672	0.00167426	0.00668201	-1.78877
3772_f_at	NA	NA	-2.55381	5.96075	-4.88369	0.000240922	0.00150738	0.177476
2288_at	NA	NA	-2.55357	3.59367	-6.41694	1.60163e-05	0.000217314	2.95744
7096_at	YBR278W	DPB3	2.55021	7.57059	7.27297	4.05492e-06	8.17408e-05	4.37021
7186_at	YBR185C	MBA1	2.54955	7.07634	6.88159	7.50642e-06	0.00012619	3.73686
5969_at	YDR500C	RPL37B	2.54943	6.93317	4.51975	0.000479626	0.00250059	-0.524023
9566_at	YMR080C	NAM7	-2.54833	4.48236	-4.42342	0.000576958	0.00287255	-0.711753
6323_at	YDR133C	NA	2.54797	7.54663	6.75929	9.13743e-06	0.000146287	3.53463
2275_g_at	NA	NA	2.54704	8.85848	6.0937	2.76129e-05	0.000317447	2.39751
10591_at	YKL016C	ATP7	2.54675	6.18859	6.0718	2.8666e-05	0.000326338	2.35905
11398_s_at	NA	NA	-2.54646	7.65388	-6.10679	2.70029e-05	0.000312595	2.42047
4503_at	YHR029C	NA	2.5445	8.36842	6.05556	2.94737e-05	0.000332291	2.3305
9342_at	YMR292W	GOT1	2.54182	5.39271	6.22788	2.19864e-05	0.000271486	2.63171
8391_at	YOR144C	ELG1	-2.54121	8.78918	-3.86095	0.00172712	0.00684324	-1.82003
6545_at	YDL053C	PBP4	2.53721	7.85669	8.98767	3.42046e-07	1.34726e-05	6.90803
2926_s_at	NA	NA	-2.53608	5.4282	-3.21709	0.00619977	0.0195776	-3.09439
7791_at	YPL052W	OAZ1	2.53524	6.77062	6.5057	1.38261e-05	0.000196151	3.10865
4366_at	YHR161C	YAP1801	-2.53478	6.85662	-5.1926	0.00013602	0.00099044	0.761798
7579_at	YPR181C	SEC23	-2.53324	5.40281	-4.69672	0.000342494	0.00194713	-0.18128
2919_s_at	NA	NA	-2.53303	5.70046	-6.46026	1.49051e-05	0.000205477	3.03137
10994_at	YJR017C	ESS1	2.53231	5.22914	5.01428	0.000188918	0.00126965	0.425835
9069_at	YNL190W	NA	2.53014	4.21777	5.1611	0.000144105	0.00103399	0.702716
5388_at	YFR001W	LOC1	2.5259	6.51758	6.93587	6.88351e-06	0.000118338	3.82596
10554_at	YKR037C	SPC34	2.52461	5.80858	4.75791	0.000305109	0.00179664	-0.063479
4932_at	YGR096W	TPC1	2.52412	6.85826	5.72287	5.25087e-05	0.000493624	1.73742
10877_at	YJR129C	NA	2.52248	10.593	5.96058	3.47025e-05	0.000373642	2.16271
5038_at	YGL024W	NA	-2.52234	8.98987	-8.35083	8.22709e-07	2.55149e-05	6.00878
4126_at	YIL045W	PIG2	-2.51957	6.25941	-3.08189	0.00811187	0.0244036	-3.35907
5101_at	YGL096W	TOS8	2.51949	6.16116	5.3745	9.77114e-05	0.000775625	1.10052
2320_at	NA	NA	-2.51901	7.54063	-5.34146	0.000103729	0.000806922	1.0393
2149_at	NA	NA	-2.51793	6.85315	-4.83546	0.000263697	0.00160995	0.0852913
6273_at	YDR216W	ADR1	-2.51648	3.31023	-9.98018	9.4963e-08	5.03682e-06	8.21634
3034_at	NA	NA	-2.5143	6.26752	-3.77214	0.00205816	0.00789356	-1.99618
8074_s_at	NA	NA	-2.5127	6.7021	-4.02913	0.0012409	0.0052463	-1.48702
5069_at	YGL082W	NA	2.51169	7.62644	7.29648	3.91013e-06	8.02419e-05	4.4076
10718_at	YKL155C	RSM22	-2.50435	7.03889	-5.86883	4.06802e-05	0.000418227	1.99947
3704_f_at	NA	NA	-2.50107	6.07863	-4.91505	0.000227209	0.00145374	0.237303
4549_at	YHL013C	NA	2.50085	7.5271	7.24692	4.22189e-06	8.34827e-05	4.32872
2494_at	NA	NA	-2.49991	4.55659	-4.79161	0.000286341	0.00171346	0.00125525
10114_at	YLR222C	UTP13	-2.49702	8.85347	-3.1084	0.00769571	0.0233169	-3.30733
6476_at	YDR015C	NA	2.49545	6.70916	6.75208	9.24457e-06	0.000146749	3.52264
5137_at	YGL153W	PEX14	2.49536	10.1706	9.38629	2.01977e-07	8.97836e-06	7.44663
11206_f_at	YJL177W	RPL17AorRPL17B	2.49518	8.08996	7.89422	1.58894e-06	4.13168e-05	5.33312
11152_g_at	YJL142C	YAK1	-2.49239	10.202	-6.84041	8.01837e-06	0.000133148	3.669
4575_i_at	YHL033C	RPL8BorRPL8A	2.49085	7.22901	4.34268	0.000674098	0.00325205	-0.869666
4321_at	YHR208W	BAT1	2.48735	10.5024	9.87227	1.08638e-07	5.5413e-06	8.0793
4925_at	YGR089W	NNF2	-2.48721	4.91402	-3.91383	0.00155625	0.00627307	-1.71522
4838_at	YGR183C	QCR9	2.48654	6.65092	5.49085	7.92629e-05	0.000667195	1.31498
6027_at	YDR421W	ARO80	-2.48251	4.77955	-6.69264	1.01797e-05	0.000156553	3.42353
7405_at	YBL047C	EDE1	-2.48229	5.35073	-6.82096	8.27293e-06	0.00013591	3.63685
5116_at	YGL126W	SCS3	2.47901	7.4979	7.41077	3.28015e-06	7.13758e-05	4.58824
10062_at	YLR260W	LCB5	-2.47602	8.9531	-4.42626	0.000573818	0.00286143	-0.706211
5746_at	YER001W	MNN1	-2.47252	6.30041	-6.2502	2.11738e-05	0.000264661	2.67042
5075_i_at	YGL076C	RPL7A	2.47237	9.06401	4.27512	0.000768236	0.0036092	-1.00218
3714_f_at	NA	NA	-2.47181	3.97299	-3.45884	0.00383204	0.0132	-2.61745
6371_at	YDR092W	UBC13	2.47155	7.63122	4.70124	0.000339575	0.00193524	-0.172558
7233_at	YBR142W	MAK5	-2.47064	6.25577	-5.44961	8.53477e-05	0.000706022	1.23916
10932_at	YJR094C	IME1	2.4705	7.77219	5.93604	3.62054e-05	0.000384065	2.11916
3719_s_at	NA	NA	-2.46923	3.87489	-5.08892	0.000164566	0.00113801	0.566906
5062_at	YGL045W	RIM8	2.46841	6.57846	4.49412	0.000503742	0.00258945	-0.573892
6435_at	YDR066C	NA	2.46824	6.38622	7.27626	4.03433e-06	8.15161e-05	4.37545
6410_at	YDR086C	SSS1	2.46677	4.18468	7.07643	5.51043e-06	0.000100489	4.05479
7425_s_at	YBL072C	RPS8BorRPS8A	2.46539	7.30216	5.3769	9.72892e-05	0.000774589	1.10495
10894_at	YJR146W	HMS2	2.46501	7.4074	5.91838	3.73287e-05	0.000393744	2.08777
10766_at	YKL196C	YKT6	2.46208	7.39641	5.38721	9.54952e-05	0.000763226	1.12403
9630_at	YMR008C	PLB1	-2.4616	9.37814	-5.15885	0.000144701	0.00103509	0.698488
2158_at	NA	NA	-2.46114	3.48058	-9.60651	1.5205e-07	7.13262e-06	7.73651
11348_at	YAL019W	FUN30	-2.45952	6.94169	-3.13384	0.0073162	0.0223661	-3.25759
8218_at	YOR328W	PDR10	-2.45918	8.24682	-2.71174	0.0168536	0.0448611	-4.07099
6389_at	YDR109C	NA	-2.45793	8.94317	-4.27939	0.000761907	0.0035885	-0.993798
6358_at	YDR123C	INO2	2.45783	6.62807	6.32151	1.87821e-05	0.000241527	2.79365
11173_at	YJL165C	HAL5	-2.45778	6.13818	-6.59807	1.18779e-05	0.000175444	3.26484
5704_at	YER005W	YND1	-2.45717	5.18332	-5.14401	0.000148696	0.00105799	0.670626
8296_at	YOR275C	RIM20	-2.45536	5.28574	-5.0947	0.000162822	0.00113007	0.577804
2992_g_at	NA	NA	-2.45477	3.03699	-11.7961	1.15371e-08	9.79081e-07	10.3511
6441_at	YDR027C	VPS54	-2.45326	9.2529	-3.57901	0.00301784	0.0107895	-2.37933
9635_at	YMR013C	SEC59	-2.4518	7.58653	-3.69872	0.00238002	0.00891912	-2.14185
4481_at	YHR051W	COX6	2.45158	5.12901	6.99544	6.26216e-06	0.000110505	3.92327
5815_at	YEL067C	NA	2.45145	5.59186	4.91725	0.000226278	0.00144995	0.241496
4805_at	YGR195W	SKI6	2.45131	8.12237	5.47535	8.14944e-05	0.000681675	1.28652
6139_at	YDR353W	TRR1	2.4505	10.0176	6.9322	6.92389e-06	0.000118813	3.81995
7555_s_at	YPL075W	GCR1	-2.44965	6.84595	-4.15033	0.000979142	0.00436708	-1.24772
3236_f_at	NA	NA	-2.44858	3.72962	-3.45471	0.00386365	0.0132795	-2.62563
6215_at	YDR250C	NA	2.44716	6.63094	7.39782	3.34581e-06	7.2299e-05	4.56786
11079_at	YJL078C	PRY3	-2.44522	8.38555	-3.61357	0.00281776	0.0101795	-2.3108
4447_at	YHR066W	SSF1	2.44474	4.36589	4.1084	0.00106262	0.00466847	-1.33041
2550_at	NA	NA	-2.44412	4.95702	-4.50381	0.00049448	0.0025531	-0.555028
8594_at	YOL057W	NA	-2.44252	7.34319	-4.39526	0.000609089	0.00300298	-0.766772
5217_at	YGL208W	SIP2	2.44176	6.95943	6.40232	1.64106e-05	0.000220422	2.93243
10876_at	YJR128W	NA	2.44134	6.48202	5.79703	4.61053e-05	0.000453523	1.87092
10415_at	YLL061W	MMP1	-2.44035	4.98061	-6.44354	1.5324e-05	0.00020975	3.00287
5689_at	YER034W	NA	2.4399	6.19374	4.9947	0.000195904	0.00130347	0.388728
10111_at	YLR219W	MSC3	-2.43578	6.74301	-5.00628	0.000191742	0.00128273	0.41067
5718_at	YER018C	SPC25	2.43565	7.58495	5.18287	0.000138467	0.00100435	0.743547
6419_at	YDR050C	TPI1	2.43408	9.4302	4.92635	0.000222469	0.0014362	0.258831
8965_at	YNL112W	DBP2	-2.43398	8.40595	-2.33811	0.0347267	0.0828241	-4.75963
10249_at	YLR085C	ARP6	2.43398	10.4588	10.1541	7.66322e-08	4.30941e-06	8.43463
7577_at	YPR179C	HDA3	-2.43301	8.08737	-4.86825	0.000247984	0.00153721	0.147988
5322_at	YFR025C	HIS2	2.43228	6.57613	5.62654	6.22432e-05	0.000559406	1.5629
4912_at	YGR076C	MRPL25	2.43137	7.04003	6.75652	9.17851e-06	0.000146287	3.53001
3895_s_at	NA	NA	-2.4301	6.72441	-3.51048	0.00345809	0.0121176	-2.51519
8394_at	YOR147W	MDM32	-2.42944	5.49584	-5.50657	7.70637e-05	0.000653991	1.34383
7264_at	YBR086C	IST2	-2.42861	5.16431	-10.8257	3.43558e-08	2.25853e-06	9.24914
10674_at	YKL110C	KTI12	2.42738	9.94939	6.57923	1.22504e-05	0.000180091	3.23309
11288_at	YAR023C	NA	2.42692	5.39987	4.6127	0.000401691	0.00219286	-0.343634
7149_at	YBR193C	MED8	2.42673	8.05139	6.70493	9.97853e-06	0.000154221	3.44406
8510_at	YOR037W	CYC2	-2.42508	6.53159	-7.15719	4.85494e-06	9.11889e-05	4.18504
10307_at	YLR011W	LOT6	2.42327	7.79825	9.19699	2.58846e-07	1.09336e-05	7.19311
7200_at	YBR154C	RPB5	2.42287	7.30714	5.89852	3.86362e-05	0.000403884	2.05241
2911_s_at	NA	NA	-2.42242	6.27148	-6.38017	1.70275e-05	0.000226105	2.89448
10985_at	YJR056C	NA	2.42173	6.80392	4.52944	0.000470822	0.00246502	-0.505185
4770_at	YGR250C	NA	-2.41683	8.34413	-2.99441	0.00964998	0.0281755	-3.52925
4038_at	NA	NA	-2.41653	6.57796	-2.96028	0.0103251	0.0298129	-3.59535
9130_at	YNL264C	PDR17	2.41589	8.28709	6.32213	1.87628e-05	0.000241527	2.7947
10722_at	YKL151C	NA	2.41495	8.03274	6.51136	1.36976e-05	0.000195516	3.11825
11396_g_at	NA	NA	-2.41478	5.75197	-4.36384	0.00064712	0.00315285	-0.828234
6588_at	YDL098C	SNU23	2.41473	5.97345	8.41703	7.49366e-07	2.40389e-05	6.10455
6187_at	YDR267C	NA	2.41463	8.26137	5.17814	0.000139671	0.0010115	0.734694
11038_at	YJL029C	VPS53	-2.41388	6.77268	-5.11573	0.000156635	0.00110134	0.617423
9994_at	YLR325C	RPL38	2.41381	5.38122	4.90594	0.000231106	0.00147053	0.21994
6313_at	YDR167W	TAF10	2.40806	6.7713	4.52806	0.000472065	0.00247014	-0.507867
7154_at	YBR198C	TAF5	-2.40785	6.97469	-3.01416	0.00927923	0.0272824	-3.49091
8433_at	YOR141C	ARP8	-2.40653	7.7768	-3.43078	0.004052	0.0138352	-2.67298
9776_at	YML111W	BUL2	-2.4062	4.52125	-3.02785	0.00903058	0.0266689	-3.4643
2203_s_at	NA	NA	-2.40592	7.63185	-3.2863	0.00540195	0.0175766	-2.95823
5920_at	YDR541C	NA	2.40583	10.0119	7.68131	2.17853e-06	5.33769e-05	5.00889
8001_at	YPL249C	GYP5	-2.40103	5.90945	-3.26904	0.00559085	0.0180903	-2.99224
10174_at	YLR144C	ACF2	-2.39631	8.10241	-2.34375	0.0343552	0.0822323	-4.74953
10305_at	YLR009W	RLP24	2.39537	4.30475	6.32938	1.85362e-05	0.00023933	2.80719
8999_at	YNL123W	NA	-2.39477	5.97508	-2.50965	0.0249832	0.06269	-4.44818
8365_at	YOR208W	PTP2	-2.39399	5.76085	-3.42571	0.00409306	0.0139499	-2.683
5104_at	YGL093W	SPC105	-2.39388	8.78165	-2.75919	0.0153549	0.0415361	-3.98107
8562_at	YOR001W	RRP6	-2.39337	6.74622	-4.29517	0.000738977	0.00350526	-0.962831
5359_at	YFR017C	NA	2.3911	5.21691	6.50804	1.37727e-05	0.000195989	3.11263
5565_at	YER125W	RSP5	-2.38988	5.59994	-6.50666	1.38041e-05	0.000196136	3.11029
4818_at	YGR208W	SER2	2.38963	9.06851	8.24826	9.51754e-07	2.84764e-05	5.85929
10643_at	YKL053C-A	MDM35	2.38953	4.9418	5.4401	8.68181e-05	0.000715023	1.22165
9044_at	YNL169C	PSD1	-2.38807	7.88032	-4.56059	0.000443624	0.00236237	-0.444671
4368_at	NA	NA	2.38561	5.28976	5.36304	9.97558e-05	0.000783856	1.0793
10658_at	YKL081W	TEF4	2.38518	7.04146	5.10003	0.000161229	0.00112235	0.587859
10773_at	YKL190W	CNB1	2.38227	8.02419	4.65059	0.000373791	0.00207969	-0.270347
9998_at	YLR329W	REC102	2.38089	7.26036	7.37939	3.44166e-06	7.38572e-05	4.53882
4472_s_at	YHR043C	DOG2orDOG1	2.3799	7.12381	7.70324	2.10833e-06	5.20668e-05	5.04255
7842_at	YPL093W	NOG1	-2.37867	8.34737	-3.46749	0.00376669	0.0129989	-2.60033
9974_at	YLR350W	ORM2	2.37683	6.9417	5.42623	8.90103e-05	0.00072887	1.19609
4806_at	YGR196C	FYV8	-2.37683	5.80133	-4.13327	0.00101227	0.00449135	-1.28135
10166_at	YLR185W	RPL37AorRPL37B	2.3764	7.29383	4.76044	0.000303657	0.00179067	-0.0586139
5625_at	YER094C	PUP3	2.37596	6.47572	4.18858	0.000908848	0.0041165	-1.17236
10633_at	YKL063C	NA	2.37258	6.10701	7.33843	3.66522e-06	7.70743e-05	4.47411
4163_at	YIL054W	NA	2.37212	4.72363	6.02299	3.11671e-05	0.000345951	2.2731
4964_at	YGR038W	ORM1	2.37067	5.3611	5.74606	5.04127e-05	0.000480524	1.77923
8211_at	YOR321W	PMT3	-2.36947	6.97903	-6.12486	2.61839e-05	0.000306684	2.45212
10299_at	YLR047C	NA	-2.36763	5.97185	-4.78514	0.00028985	0.00172892	-0.0111668
3517_f_at	NA	NA	-2.36643	4.22361	-4.27431	0.000769437	0.00361302	-1.00376
10654_at	YKL085W	MDH1	2.36584	9.2216	6.45629	1.50034e-05	0.000206269	3.02462
6235_at	YDR224C	HTB1	2.36537	3.83729	6.58345	1.21659e-05	0.000179131	3.24021
10312_at	YLR016C	NA	2.36399	5.18552	6.4595	1.49238e-05	0.000205477	3.03009
10103_at	YLR211C	NA	2.36326	6.08063	5.64624	6.01099e-05	0.000545312	1.59868
3279_f_at	NA	NA	-2.36303	4.22389	-3.31022	0.00515078	0.0169223	-2.9111
8189_at	YOR345C	NA	-2.36245	8.17138	-3.80434	0.00193127	0.00748687	-1.93229
10283_at	YLR031W	NA	-2.36241	7.51733	-4.03584	0.00122469	0.00519422	-1.47375
9925_at	YLR390W	ECM19	2.36193	6.21966	6.28408	2e-05	0.000254707	2.72905
9668_at	YML042W	CAT2	-2.36078	4.76852	-4.19042	0.000905593	0.00410574	-1.16873
4865_at	YGR120C	COG2	2.36063	6.25941	4.97813	0.000202029	0.00133471	0.357271
10772_at	YKL190W	CNB1	2.35829	8.16579	5.15961	0.0001445	0.00103444	0.699913
5692_at	YER037W	PHM8	2.35707	6.70443	6.15586	2.4839e-05	0.000295755	2.50632
5122_at	YGL120C	PRP43	-2.35691	11.0457	-4.99887	0.000194394	0.00129619	0.396633
5657_at	YER046W	SPO73	2.35679	6.77922	6.21789	2.23607e-05	0.000275743	2.61436
4970_at	YGR044C	RME1	-2.35651	6.22808	-8.45769	7.07777e-07	2.29883e-05	6.1631
10961_at	YJR077C	MIR1	2.35419	7.72927	7.96407	1.43442e-06	3.81937e-05	5.43819
6459_at	YDL003W	MCD1	-2.3514	4.08675	-9.70154	1.3472e-07	6.55006e-06	7.85995
11305_s_at	YAR062W	NA	2.34994	7.39903	3.1864	0.00659017	0.0205293	-3.15464
4744_at	YGR268C	HUA1	2.34976	5.5923	4.25273	0.00080232	0.00373922	-1.04616
10569_at	YKR006C	MRPL13	2.34958	5.91735	6.07997	2.82685e-05	0.000322599	2.3734
7739_at	YPR031W	NA	-2.34902	9.9627	-3.4566	0.00384917	0.0132346	-2.62189
8464_at	YOR083W	WHI5	2.34869	7.2629	4.9887	0.000198099	0.00131526	0.377341
4847_at	YGR147C	NAT2	2.3462	8.48312	6.91032	7.16964e-06	0.000121467	3.78407
4203_at	YIL108W	NA	-2.34569	9.41115	-3.96424	0.00140939	0.00581239	-1.61539
6508_at	YDL044C	MTF2	2.34369	11.7719	14.0335	1.21009e-09	1.54742e-07	12.6004
8540_at	YOR022C	NA	-2.34031	7.09337	-3.68643	0.00243869	0.00908771	-2.16624
4820_at	YGR165W	MRPS35	2.33996	7.99369	6.44885	1.51897e-05	0.000208218	3.01192
4186_at	YIL078W	THS1	-2.33981	7.05562	-5.6742	5.72117e-05	0.000524113	1.64939
2542_at	NA	NA	-2.3381	3.05362	-1.78377	0.0961241	0.195576	-5.68973
4583_at	YHL025W	SNF6	2.33805	6.49546	7.30839	3.83892e-06	7.99753e-05	4.4265
6885_at	YCR008W	SAT4	-2.33783	7.3942	-3.4331	0.00403336	0.0137867	-2.66839
4584_at	YHL024W	RIM4	-2.33732	5.33165	-5.94382	3.57214e-05	0.000380227	2.13298
11223_at	YJL203W	PRP21	2.33646	4.96534	10.637	4.28706e-08	2.74108e-06	9.02468
5043_at	YGL019W	CKB1	2.33408	7.00481	6.07055	2.87272e-05	0.000326637	2.35686
10052_at	YLR292C	SEC72	2.33346	7.0749	6.20304	2.29295e-05	0.000279759	2.58854
9944_at	YLR365W	NA	2.33036	6.56162	5.63701	6.10994e-05	0.000551076	1.58193
7680_at	YPR060C	ARO7	2.33006	8.47368	6.6439	1.10205e-05	0.00016593	3.3419
6507_at	YDL045C	FAD1	2.32945	9.77442	6.09249	2.767e-05	0.000317711	2.39539
9570_at	YMR084W	NA	2.32885	6.6552	4.5196	0.00047976	0.00250059	-0.524306
9606_at	YMR029C	FAR8	-2.32829	9.55235	-7.95369	1.45633e-06	3.85124e-05	5.42262
9649_at	YML015C	TAF11	2.32591	9.65578	5.20655	0.000132594	0.000971557	0.787905
4741_at	YGR265W	NA	-2.32444	7.02779	-4.34517	0.000670864	0.00324147	-0.864787
9671_at	YML037C	NA	2.32115	4.72171	5.88727	3.93974e-05	0.000410463	2.03238
7382_at	YBL025W	RRN10	2.32107	7.94654	6.45246	1.5099e-05	0.000207278	3.01808
8646_at	YOL097C	WRS1	2.32103	8.63727	4.43381	0.00056555	0.00283382	-0.691472
11213_at	YJL170C	ASG7	2.32052	7.16347	5.94847	3.54354e-05	0.000378478	2.14124
9673_at	YML035C	AMD1	-2.32042	7.1433	-3.99741	0.00132051	0.0055202	-1.54973
7541_at	YPR189W	SKI3	-2.31889	3.18312	-4.5695	0.000436144	0.00233318	-0.427372
5564_at	YER171W	RAD3	-2.31815	8.76904	-3.87137	0.001692	0.00673553	-1.79937
7826_at	YPL063W	TIM50	-2.31732	5.67764	-2.99029	0.00972912	0.0283551	-3.53724
9883_at	YLR436C	ECM30	-2.31621	4.13611	-2.29817	0.0374647	0.0882719	-4.8308
11255_at	YJL217W	NA	2.31524	7.6697	7.93853	1.48898e-06	3.92358e-05	5.39985
7716_at	YPR051W	MAK3	2.31402	10.1652	5.72755	5.20786e-05	0.000490686	1.74586
7189_at	YBR188C	NTC20	2.31342	4.04002	6.05357	2.95748e-05	0.000333029	2.32698
11002_at	YJR024C	NA	2.3124	9.15569	6.7569	9.17277e-06	0.000146287	3.53066
4824_at	YGR169C	PUS6	2.31185	9.82361	6.71652	9.79264e-06	0.000152611	3.4634
5917_at	YDR538W	PAD1	2.31028	9.40162	7.21305	4.44996e-06	8.58272e-05	4.27462
7736_at	YPR028W	YOP1	2.30992	8.62068	7.34052	3.65349e-06	7.70743e-05	4.47741
5501_at	NA	NA	-2.30788	8.18764	-3.82541	0.00185256	0.00724493	-1.8905
11307_s_at	NA	NA	2.3057	6.05822	6.1864	2.35849e-05	0.000284819	2.55957
4877_at	YGR132C	PHB1	2.30548	5.20974	4.36301	0.000648158	0.00315626	-0.82986
9144_at	YNL295W	NA	-2.30474	6.2565	-4.45112	0.000547052	0.0027604	-0.657697
10005_at	YLR335W	NUP2	-2.30469	5.98586	-2.89763	0.0116877	0.0329026	-3.71625
11228_at	YJL198W	PHO90	-2.30386	8.66924	-6.62941	1.12844e-05	0.000168275	3.31757
5294_at	NA	NA	-2.3038	5.14595	-3.66363	0.00255142	0.00939546	-2.21148
10013_at	YLR298C	YHC1	2.30155	5.34572	5.2803	0.000115904	0.000874671	0.925623
4743_at	YGR267C	FOL2	2.30129	6.72835	5.91655	3.74474e-05	0.000393929	2.08451
5129_at	YGL113W	SLD3	-2.29953	6.62022	-2.78924	0.0144736	0.0394831	-3.92387
4103_at	YIL022W	TIM44	2.29795	10.237	7.96326	1.4361e-06	3.81937e-05	5.43699
5385_at	YFL003C	MSH4	-2.29766	6.75454	-2.55924	0.0226943	0.0576623	-4.35656
8836_at	YNR033W	ABZ1	-2.29762	8.36323	-4.2394	0.000823357	0.00381252	-1.07237
7737_at	YPR029C	APL4	-2.2969	6.12471	-2.65393	0.018872	0.0494444	-4.17987
8653_at	YOL090W	MSH2	-2.29639	3.84293	-7.24611	4.22723e-06	8.34827e-05	4.32742
9972_at	YLR348C	DIC1	2.2957	9.91131	5.00565	0.000191965	0.00128275	0.409481
10408_at	NA	NA	2.29566	8.41496	6.13401	2.57792e-05	0.000304176	2.46813
7966_at	YPL194W	DDC1	-2.29361	5.759	-5.58641	6.68378e-05	0.000588552	1.48984
3188_at	YHL048W	COS8	2.2916	7.94998	2.91641	0.0112618	0.0320319	-3.68008
5127_at	YGL115W	SNF4	2.29072	6.60432	5.61315	6.37387e-05	0.000568527	1.53854
7084_at	YBR264C	YPT10	2.28959	9.00553	5.74568	5.0446e-05	0.000480524	1.77856
7414_at	YBL038W	MRPL16	2.28625	6.57351	6.10215	2.72175e-05	0.000313833	2.41234
5989_at	YDR475C	NA	2.2857	6.74301	5.60753	6.43772e-05	0.000572344	1.52831
6160_at	YDR328C	SKP1	2.28492	8.18131	5.75822	4.93481e-05	0.00047325	1.80114
5085_at	YGL067W	NPY1	2.28397	8.61254	6.48533	1.42992e-05	0.000199825	3.07405
10053_at	YLR293C	GSP1	2.28229	6.36803	4.55073	0.000452054	0.00239377	-0.463818
11033_at	YJR010C-A	SPC1	2.2815	5.50137	7.42827	3.19352e-06	7.08906e-05	4.61575
6576_at	YDL110C	NA	2.28047	6.57079	6.17717	2.39566e-05	0.00028819	2.54349
9082_at	YNL221C	POP1	-2.28006	8.8467	-3.27967	0.00547376	0.0177888	-2.9713
9498_f_at	YMR143W	RPS16AorRPS16B	2.28006	6.9696	5.62236	6.27063e-05	0.000562308	1.55529
2411_s_at	NA	NA	2.27874	7.75354	3.68623	0.00243961	0.00908771	-2.16662
8461_at	YOR080W	DIA2	-2.27691	6.93934	-2.44574	0.0282607	0.0695711	-4.56524
6324_g_at	YDR133C	NA	2.27551	8.55331	6.41223	1.61421e-05	0.000217954	2.94939
10566_at	YKR003W	OSH6	2.27502	6.7692	6.81229	8.38899e-06	0.000136677	3.62253
4182_at	YIL084C	SDS3	2.27199	7.87057	6.55895	1.26652e-05	0.000185022	3.19885
9446_at	YMR176W	ECM5	-2.27188	4.0322	-2.37209	0.0325468	0.0784265	-4.69865
8144_g_at	YOR389W	NA	-2.27129	7.00633	-3.6629	0.00255508	0.00940523	-2.21292
3836_f_at	NA	NA	-2.26885	3.98856	-3.03953	0.00882378	0.0261658	-3.4416
7065_at	YBR292C	NA	2.26866	8.2	7.82179	1.76792e-06	4.52151e-05	5.22347
10624_at	YKL072W	STB6	-2.26785	7.65288	-3.56171	0.00312337	0.0111073	-2.41365
6931_at	YCL046W	NA	-2.26604	8.21276	-3.85793	0.00173744	0.00687247	-1.82602
6884_at	YCR006C	NA	2.26289	5.63235	7.19768	4.55771e-06	8.70724e-05	4.25001
5812_at	YEL072W	RMD6	2.26198	8.16938	5.99843	3.25111e-05	0.000355793	2.22972
9763_at	YML122C	NA	2.25904	5.95252	5.39058	9.49157e-05	0.00076014	1.13026
5379_at	YFL009W	CDC4	-2.25797	5.03873	-3.88767	0.00163851	0.00656681	-1.76706
4854_at	YGR153W	NA	2.25756	4.78546	5.39341	9.44332e-05	0.000758635	1.13548
11155_at	YJL139C	YUR1	2.25701	10.8821	7.43001	3.18506e-06	7.08906e-05	4.61848
10995_at	YJR018W	NA	2.2569	6.5002	6.95593	6.66731e-06	0.000115686	3.85879
3308_s_at	NA	NA	-2.25273	7.05507	-2.51872	0.0245483	0.0618678	-4.43146
5992_at	YDR478W	SNM1	2.25259	6.81196	5.61872	6.3112e-05	0.00056432	1.54868
10529_i_at	YKR057W	RPS21A	2.25078	9.96661	5.82832	4.36537e-05	0.000437292	1.92703
7648_at	YPR116W	NA	2.24853	8.954	6.52709	1.33468e-05	0.000191976	3.14494
7869_at	YPL111W	CAR1	2.24833	10.626	7.13887	4.99608e-06	9.30906e-05	4.15557
2506_s_at	NA	NA	-2.24775	4.0634	-1.89992	0.0782205	0.164903	-5.50644
4450_at	YHR069C	RRP4	2.2473	5.42078	6.00284	3.22656e-05	0.000354624	2.23751
6422_at	YDR053W	NA	-2.24678	8.48909	-5.77955	4.75378e-05	0.000460815	1.83951
10105_at	YLR213C	CRR1	2.24656	7.30072	8.94121	3.64108e-07	1.41035e-05	6.84407
6159_at	YDR327W	NA	2.24599	7.5047	7.69829	2.12396e-06	5.23143e-05	5.03496
4485_at	YHR057C	CPR2	2.24446	6.36344	5.22087	0.000129167	0.000952431	0.814702
7415_at	YBL037W	APL3	-2.24366	6.54118	-3.30304	0.00522499	0.0171081	-2.92526
5726_at	YEL019C	MMS21	2.2427	6.03601	6.63244	1.12287e-05	0.00016798	3.32266
7450_at	YBL091C	MAP2	2.2426	10.9921	7.89229	1.59346e-06	4.13194e-05	5.33019
8686_at	YOL148C	SPT20	-2.24242	6.46055	-6.6079	1.16883e-05	0.000173657	3.2814
5701_at	YER002W	NOP16	2.24218	8.23912	5.55067	7.12287e-05	0.000620261	1.42458
10072_at	YLR267W	NA	-2.24202	9.60562	-4.2686	0.000778009	0.00364594	-1.01499
8920_i_at	YNL067W	RPL9B	2.24079	4.16643	5.83764	4.295e-05	0.000433213	1.94371
4523_at	YHR005C-A	MRS11	2.23815	5.21715	4.61945	0.000396569	0.00217124	-0.330572
2784_s_at	NA	NA	-2.23759	6.48124	-5.78202	4.73327e-05	0.000459305	1.84395
10564_at	YKR001C	VPS1	-2.23749	7.13538	-4.76778	0.00029948	0.00177501	-0.0444936
5778_at	YEL057C	NA	2.23738	8.61209	6.87001	7.6468e-06	0.000127697	3.7178
8827_at	YNR024W	NA	2.23648	4.94662	4.85344	0.000254956	0.00157113	0.119689
5354_at	YFR012W	NA	2.23602	7.08648	6.08129	2.82048e-05	0.000322267	2.37572
4062_at	YIR026C	YVH1	2.23459	8.50635	4.64069	0.000380878	0.00210758	-0.289471
5728_i_at	YEL017C-A	PMP2	2.23198	6.33299	4.42915	0.000570634	0.00285164	-0.700561
8333_at	YOR221C	MCT1	-2.23109	6.36051	-5.15099	0.000146804	0.00104692	0.683728
5194_at	YGL186C	TPN1	-2.23094	5.79836	-5.86501	4.09512e-05	0.000420088	1.99265
4494_at	YHR021C	RPS27B	2.23056	8.45419	6.39077	1.67292e-05	0.000223735	2.91266
6587_at	YDL099W	NA	2.22832	6.95565	4.96611	0.000206591	0.00135716	0.334459
10901_at	YJR108W	ABM1	2.22807	6.02704	6.38464	1.69012e-05	0.000225068	2.90214
10039_s_at	YLR280C	NA	2.22661	7.80136	5.50852	7.67961e-05	0.00065276	1.3474
2773_at	NA	NA	-2.22643	3.6653	-7.61198	2.41729e-06	5.75356e-05	4.90201
2917_s_at	NA	NA	-2.22562	3.9761	-6.37018	1.73138e-05	0.000229254	2.87734
11210_at	YJL173C	RFA3	2.22356	5.23517	5.82682	4.37684e-05	0.000437292	1.92433
7603_at	YPR159W	KRE6	-2.22181	6.28573	-3.77899	0.00203048	0.00781309	-1.98259
4128_at	YIL043C	CBR1	-2.22046	9.96264	-6.52242	1.345e-05	0.000192866	3.13701
8197_at	YOR353C	SOG2	-2.22037	5.73643	-3.27359	0.00554046	0.0179709	-2.98328
4827_at	YGR172C	YIP1	2.22032	6.48154	8.21487	9.98244e-07	2.96771e-05	5.81035
7184_at	YBR183W	YPC1	2.22028	7.53308	5.18364	0.000138272	0.00100371	0.744991
7119_at	YBR254C	TRS20	2.22014	6.39246	5.69365	5.52817e-05	0.000513487	1.6846
5679_at	YER024W	YAT2	-2.21936	7.41697	-2.86651	0.012429	0.0346548	-3.77609
10167_at	YLR186W	EMG1	2.21666	7.60912	7.41306	3.26867e-06	7.1363e-05	4.59184
4873_at	YGR128C	UTP8	-2.21654	11.8799	-4.44801	0.000550329	0.00277393	-0.663764
2337_at	NA	NA	-2.21629	3.56408	-8.37298	7.97355e-07	2.49775e-05	6.04088
10562_at	YKL002W	DID4	2.21583	5.53529	4.3292	0.000691888	0.00332455	-0.896081
6062_at	YDR411C	DFM1	2.21532	8.79078	5.25917	0.000120451	0.000900971	0.886223
6315_at	YDR169C	STB3	-2.21527	6.31219	-2.8131	0.0138096	0.0379044	-3.87837
7219_at	YBR128C	ATG14	2.21515	7.27861	5.94276	3.5787e-05	0.000380492	2.1311
10476_at	YKR096W	NA	-2.21297	4.97607	-2.01987	0.0629439	0.136933	-5.31012
4955_at	YGR074W	SMD1	2.21267	6.14901	6.89089	7.39565e-06	0.000124843	3.75215
9890_s_at	NA	NA	2.21172	7.12624	4.8735	0.000245555	0.00152715	0.158033
7334_at	YBR021W	FUR4	-2.21116	8.12634	-4.51976	0.000479619	0.00250059	-0.524007
7275_at	YBR094W	NA	-2.21028	7.40873	-4.74048	0.000315307	0.00183732	-0.0969941
4349_at	YHR189W	PTH1	2.20996	6.32816	6.74727	9.31677e-06	0.000147161	3.51463
10712_at	YKL117W	SBA1	2.20904	6.1227	4.99523	0.000195711	0.00130347	0.389734
2493_at	NA	NA	-2.2088	5.2347	-4.2866	0.000751336	0.00355666	-0.979641
10757_at	YKL162C	NA	2.20673	7.77209	8.13923	1.11268e-06	3.22575e-05	5.69896
5935_at	YDR511W	ACN9	2.20641	5.2914	5.63984	6.07941e-05	0.000549383	1.58707
9125_at	YNL269W	BSC4	2.20472	5.31369	6.31307	1.90499e-05	0.000243604	2.77909
6852_at	YCR020C	PET18	2.20379	8.31594	6.60723	1.17011e-05	0.000173657	3.28027
7955_at	YPL203W	TPK2	-2.20248	4.1808	-7.06477	5.61251e-06	0.000101851	4.03591
6302_at	YDR156W	RPA14	2.2016	5.90066	5.18781	0.000137219	0.000997616	0.752815
7064_at	YBR291C	CTP1	-2.20135	4.39958	-10.8444	3.36181e-08	2.22571e-06	9.27113
6409_at	YDR085C	AFR1	-2.20078	5.55755	-4.61511	0.000399859	0.00218541	-0.338982
4426_at	YHR090C	YNG2	2.20071	5.06027	7.38835	3.39467e-06	7.30168e-05	4.55295
3652_f_at	NA	NA	-2.20016	3.73605	-3.04292	0.00876462	0.0260069	-3.43501
5709_at	YER009W	NTF2	2.20003	3.64763	5.51969	7.52774e-05	0.000644101	1.36788
3012_s_at	NA	NA	-2.19999	3.03698	-9.51447	1.71108e-07	7.71639e-06	7.616
8285_at	YOR264W	DSE3	2.19883	9.33855	5.79924	4.59281e-05	0.000452549	1.87488
4352_at	YHR192W	NA	2.19722	5.70435	5.11058	0.000158126	0.0011086	0.607733
9136_at	YNL258C	DSL1	-2.19659	5.92496	-4.1996	0.00088957	0.00404685	-1.15067
2652_s_at	NA	NA	-2.19568	5.01951	-3.7261	0.0022544	0.00851673	-2.08752
4577_at	YHL031C	GOS1	2.19556	6.80824	7.30708	3.84669e-06	7.99753e-05	4.42442
11190_at	YJL148W	RPA34	2.19479	4.58757	8.81141	4.34115e-07	1.5803e-05	6.66402
4157_at	YIL060W	NA	2.19384	8.02075	4.93006	0.000220938	0.00142829	0.265887
5429_at	YFL051C	NA	2.193	6.07491	5.02278	0.000185965	0.00125705	0.441936
10685_at	YKL099C	UTP11	2.19261	4.05776	6.12264	2.6283e-05	0.000307458	2.44824
4187_at	YIL077C	NA	2.19177	7.3413	5.25547	0.000121265	0.000905608	0.879328
5671_s_at	YER056C-A	RPL34BorRPL34A	2.19165	7.22361	4.91332	0.000227947	0.00145521	0.233992
8676_at	YOL112W	MSB4	-2.19138	5.86512	-4.48176	0.000515818	0.00262966	-0.597967
2779_s_at	NA	NA	2.18982	7.07889	4.66049	0.000366831	0.00204929	-0.251205
6482_at	YDL025C	NA	-2.18717	6.03707	-4.49125	0.000506525	0.00259577	-0.57949
4414_at	YHR121W	LSM12	2.18653	4.37118	4.1454	0.00098859	0.00440501	-1.25743
3247_s_at	NA	NA	2.18615	8.44432	4.53477	0.000466052	0.00244553	-0.494831
4745_at	YGR269W	NA	2.18606	5.86466	4.87233	0.000246094	0.00152847	0.155795
4809_at	YGR199W	PMT6	-2.18493	5.39962	-6.25479	2.10108e-05	0.000263978	2.67837
5652_at	YER079W	NA	2.18454	5.87655	5.56955	6.88731e-05	0.000603691	1.45907
10129_at	YLR194C	NA	2.18385	8.49478	5.34713	0.00010267	0.000803451	1.04981
5346_at	YFR004W	RPN11	2.18365	7.4479	3.35411	0.00471992	0.0157247	-2.82451
5264_at	YGL249W	ZIP2	-2.18311	8.77603	-3.47557	0.00370663	0.0128391	-2.58433
5999_at	YDR485C	VPS72	-2.18227	7.80732	-6.11878	2.64564e-05	0.000308638	2.44148
10144_at	YLR206W	ENT2	2.18192	9.09775	2.28686	0.0382762	0.0898663	-4.85085
6130_at	YDR344C	NA	2.18136	5.76922	4.15653	0.000967376	0.00432286	-1.23549
10973_at	YJR044C	VPS55	2.18071	6.00621	6.66104	1.07168e-05	0.00016319	3.37064
11257_at	YJL215C	NA	2.1786	5.88493	5.32397	0.000107068	0.000826698	1.00684
10920_at	YJR079W	NA	2.17851	10.4889	9.35286	2.10965e-07	9.24582e-06	7.40215
11344_at	YAL023C	PMT2	-2.17682	8.13433	-2.39103	0.0313895	0.0761687	-4.66452
5787_at	YEL048C	NA	2.17653	5.1344	7.20496	4.50636e-06	8.65574e-05	4.26166
7583_at	YPR185W	ATG13	-2.17643	6.08183	-4.773	0.000296552	0.00175878	-0.0344767
8304_at	YOR238W	NA	2.17597	9.94544	5.90584	3.81487e-05	0.00039939	2.06546
9675_at	YML034W	SRC1	-2.17475	10.0213	-4.27795	0.000764029	0.00359668	-0.996616
2210_s_at	NA	NA	-2.17456	4.04875	-4.61912	0.000396819	0.00217134	-0.331213
11012_at	YJL009W	NA	2.17432	7.28913	5.7658	4.86964e-05	0.000467675	1.81479
6141_at	YDR311W	TFB1	-2.17389	5.99262	-5.36861	9.87562e-05	0.000778622	1.08962
4881_at	YGR136W	LSB1	2.17085	7.52653	6.51839	1.35397e-05	0.000193854	3.13018
11159_s_at	YJL136C	RPS21AorRPS21B	2.17072	8.1623	6.18396	2.36823e-05	0.000285355	2.55533
7191_f_at	YBR189W	RPS9AorRPS9B	2.17022	10.002	8.52908	6.40553e-07	2.15869e-05	6.26542
2774_at	NA	NA	-2.16871	3.42452	-7.61062	2.42223e-06	5.75356e-05	4.89991
9441_at	YMR172C-A	NA	-2.16848	6.62706	-7.33685	3.67413e-06	7.70743e-05	4.47161
7827_at	YPL062W	NA	2.16846	12.1066	8.44209	7.23436e-07	2.32872e-05	6.14066
4241_at	YIL160C	POT1	2.16665	7.47316	4.46452	0.000533158	0.00270491	-0.631562
3394_f_at	NA	NA	-2.16663	4.04179	-3.10172	0.00779864	0.0235829	-3.32039
9549_at	YMR107W	SPG4	2.16624	4.08321	2.91501	0.0112929	0.0321009	-3.68277
4878_at	YGR133W	PEX4	2.16614	6.70989	5.47968	8.08645e-05	0.00067823	1.29447
8194_at	YOR350C	MNE1	-2.16557	6.96025	-2.71045	0.0168961	0.0449615	-4.07341
7109_at	YBR244W	GPX2	2.16532	6.37991	6.41827	1.59808e-05	0.000217148	2.95972
5136_at	YGL106W	MLC1	2.16316	4.38074	5.69758	5.48999e-05	0.000511468	1.69172
4945_at	YGR064W	NA	2.16298	5.58929	5.50862	7.67822e-05	0.00065276	1.34759
10304_at	YLR050C	NA	2.16227	5.68923	3.52841	0.00333696	0.0117682	-2.47964
2287_at	NA	NA	-2.16213	3.56112	-5.39493	9.41738e-05	0.000757202	1.1383
11179_at	YJL159W	HSP150	2.1621	4.98633	6.57612	1.23131e-05	0.000180727	3.22784
3637_f_at	NA	NA	-2.16192	5.40026	-3.78832	0.00199337	0.00769885	-1.96407
5086_at	YGL066W	SGF73	-2.16088	6.1419	-4.92707	0.000222174	0.00143529	0.260188
10738_i_at	YKL180W	RPL17AorRPL17B	2.15895	9.44393	6.91136	7.15775e-06	0.000121467	3.78578
8859_at	YNR011C	PRP2	-2.15848	7.26944	-3.33919	0.00486217	0.0160838	-2.85395
2204_s_at	NA	NA	-2.15809	6.37074	-3.66973	0.00252071	0.00931913	-2.19936
9351_at	YMR257C	PET111	-2.15737	9.33697	-3.24562	0.00585753	0.0187389	-3.0383
5707_at	YER007C-A	NA	2.15696	7.54299	6.70999	9.89693e-06	0.000153468	3.4525
5686_at	YER031C	YPT31	2.15631	6.27307	4.781	0.00029212	0.00173912	-0.0191214
7222_at	YBR131W	CCZ1	-2.15617	8.87428	-3.6683	0.00252787	0.00933822	-2.2022
9398_at	YMR216C	SKY1	-2.15502	6.61206	-4.56804	0.000437364	0.00233569	-0.430213
5266_at	YGL247W	BRR6	2.15352	8.7177	4.90303	0.000232365	0.0014746	0.214393
4802_i_at	YGR192C	TDH2orTDH3	2.15322	10.3802	5.00968	0.000190537	0.00127961	0.417113
10326_g_at	YLR029C	RPL15BorRPL15A	2.15292	6.08264	6.0843	2.80598e-05	0.000321003	2.38101
7308_at	YBR040W	FIG1	2.1527	8.08433	4.33042	0.000690265	0.00332317	-0.8937
10099_at	YLR251W	SYM1	2.15202	5.04336	5.61243	6.38206e-05	0.000568527	1.53722
5611_at	YER083C	RMD7	2.15054	6.77614	5.90562	3.81635e-05	0.00039939	2.06506
5307_at	YFR053C	HXK1	2.14988	10.2242	6.75089	9.26242e-06	0.000146749	3.52065
7087_at	YBR269C	NA	2.14939	4.76324	6.47469	1.4553e-05	0.000201263	3.05596
10668_at	YKL073W	LHS1	-2.14934	6.35989	-3.97856	0.00137029	0.00569279	-1.58704
8962_at	YNL114C	NA	2.14925	6.33666	4.71081	0.000333483	0.0019151	-0.154114
6392_at	YDR068W	DOS2	2.14921	7.81039	6.23183	2.18404e-05	0.000270093	2.63856
9629_at	YMR007W	NA	2.14911	5.17388	5.36668	9.9102e-05	0.000780669	1.08604
9107_at	YNL242W	ATG2	-2.14817	3.48361	-4.96442	0.000207245	0.0013605	0.331233
8494_at	YOR066W	NA	-2.14667	6.30024	-4.67039	0.00036001	0.00201844	-0.23209
5058_at	YGL049C	TIF4632	-2.14591	5.86994	-3.92045	0.00153611	0.00622917	-1.7021
9589_at	YMR059W	SEN15	2.1445	5.54131	4.51171	0.000487063	0.00252526	-0.539665
7915_at	YPL155C	KIP2	-2.14412	6.35384	-3.46333	0.00379797	0.0130923	-2.60857
11221_at	NA	NA	2.14309	5.18811	5.86087	4.12475e-05	0.000421275	1.98525
6333_at	YDR142C	PEX7	2.14293	8.99059	7.06158	5.64079e-06	0.000101851	4.03075
11259_at	YJL213W	NA	2.14271	6.89522	5.2628	0.000119657	0.000896466	0.892998
4116_at	YIL009C-A	EST3	2.14266	6.38406	5.77373	4.80243e-05	0.000463605	1.82906
9394_at	YMR212C	EFR3	-2.14205	7.20735	-3.81183	0.00190289	0.00740411	-1.91743
4922_at	YGR086C	PIL1	2.14131	7.13368	6.71222	9.86109e-06	0.000153167	3.45623
6374_at	YDR094W	NA	2.14122	5.2229	5.10067	0.000161039	0.00112186	0.589066
5378_at	YFL010C	WWM1	2.14071	6.68095	4.35502	0.000658237	0.00319825	-0.845514
4380_at	YHR131C	NA	-2.14048	5.52628	-3.47172	0.00373507	0.0129184	-2.59194
6573_at	YDL113C	ATG20	-2.13935	6.41982	-4.62155	0.000394986	0.00216511	-0.326499
11186_at	YJL152W	NA	2.13799	6.20846	5.49197	7.91036e-05	0.000666455	1.31705
5134_at	YGL108C	NA	2.13768	5.01827	6.17564	2.40189e-05	0.000288567	2.54082
9891_at	YLR442C	SIR3	-2.13605	5.12684	-1.73606	0.104478	0.210284	-5.76292
11365_at	YAL043C	PTA1	-2.136	6.73387	-5.34942	0.000102244	0.000801385	1.05406
4160_at	YIL057C	NA	2.1352	6.97648	4.61971	0.000396377	0.00217124	-0.330078
7795_at	YPL048W	CAM1	2.13495	8.75707	5.99511	3.26971e-05	0.000356991	2.22386
4130_at	YIL041W	NA	2.1349	6.25904	5.13285	0.000151778	0.001075	0.649643
5421_i_at	YFL067W	NA	-2.13474	6.36707	-4.68857	0.000347821	0.00197021	-0.197003
4557_at	YHL005C	NA	2.13326	4.22149	7.19955	4.54449e-06	8.70724e-05	4.253
4312_at	YHR198C	NA	2.13203	6.1333	4.17007	0.000942186	0.00423258	-1.20881
10116_at	YLR224W	NA	2.13181	7.18476	4.09978	0.00108067	0.00471405	-1.34743
9139_at	YNL255C	GIS2	2.13105	4.06006	5.5374	7.29338e-05	0.000630932	1.40032
4216_at	YIL140W	AXL2	-2.13057	4.77859	-3.88086	0.00166066	0.0066334	-1.78056
9499_at	YMR144W	NA	2.12921	7.80363	4.48696	0.000510699	0.00261083	-0.587832
10933_at	YJR094W-A	RPL43B	2.1292	7.49251	4.74785	0.000310953	0.00181762	-0.0828192
9175_at	YNL309W	STB1	-2.12833	6.68866	-9.05085	3.14292e-07	1.287e-05	6.99462
9197_s_at	YNL334C	SNO2orSNO3	2.12811	9.12998	4.16509	0.000951369	0.00426357	-1.21862
10990_at	YJR013W	GPI14	2.12654	8.39427	7.49505	2.88464e-06	6.61624e-05	4.72033
3740_f_at	NA	NA	-2.12566	5.82824	-3.17352	0.00676109	0.0209475	-3.17988
6158_at	YDR326C	NA	-2.12557	2.93482	-4.26092	0.00078968	0.00369137	-1.03007
10386_s_at	YLL045C	RPL8BorRPL8A	2.12436	5.05621	6.03733	3.04093e-05	0.000339784	2.29839
3555_s_at	NA	NA	-2.12261	6.69392	-2.79822	0.01422	0.0388368	-3.90675
6636_at	YDL139C	SCM3	2.12195	4.74477	5.16544	0.000142962	0.00102816	0.710863
4782_at	YGR216C	GPI1	-2.12172	6.67403	-4.74261	0.000314038	0.00183221	-0.092883
5536_at	YER187W	NA	2.11931	6.52584	4.13519	0.00100849	0.00447869	-1.27757
5374_at	YFL013W-A	NA	2.11865	8.02735	7.24428	4.23923e-06	8.34878e-05	4.3245
4821_at	YGR166W	KRE11	-2.11857	4.50182	-2.19288	0.0456894	0.104358	-5.01572
11352_at	YAL015C	NTG1	2.11832	6.61395	4.24955	0.000807293	0.0037549	-1.05241
4749_at	YGR273C	NA	2.11684	4.84336	5.59857	6.54101e-05	0.00058078	1.51199
9067_at	YNL192W	CHS1	-2.116	3.21228	-7.7062	2.09902e-06	5.19743e-05	5.0471
10308_at	YLR012C	NA	2.1156	3.73788	6.73913	9.44025e-06	0.000148607	3.50109
9475_at	YMR163C	NA	-2.11473	7.75977	-4.8731	0.000245739	0.00152728	0.157271
7403_at	YBL049W	MOH1	2.11457	7.90839	5.51614	7.57565e-05	0.000647015	1.36138
6436_at	YDR021W	FAL1	2.11298	4.18027	4.10661	0.00106634	0.00466847	-1.33394
7212_at	YBR165W	UBS1	2.11292	5.68683	5.08889	0.000164575	0.00113801	0.566851
4340_at	YHR180W	NA	2.11231	7.30615	3.58669	0.00297218	0.0106386	-2.36411
5148_at	YGL141W	HUL5	-2.11226	7.69577	-2.51052	0.024941	0.0626039	-4.44657
3025_s_at	NA	NA	2.11141	5.11705	3.24005	0.00592283	0.0188831	-3.04926
6365_at	YDR130C	FIN1	2.11114	4.02739	5.94665	3.55474e-05	0.000378807	2.138
5141_at	YGL148W	ARO2	2.11098	10.0145	7.61758	2.39701e-06	5.72278e-05	4.91067
6861_at	YCR027C	RHB1	2.11079	6.16504	5.50923	7.66986e-05	0.00065276	1.3487
4994_at	YGR021W	NA	2.10934	6.64895	5.47577	8.14333e-05	0.000681675	1.28729
7199_at	YBR153W	RIB7	2.10875	8.62353	5.43067	8.83024e-05	0.000724981	1.20428
6170_at	YDR296W	MHR1	2.10832	6.81566	4.04514	0.00120258	0.00512825	-1.45536
10661_at	YKL079W	SMY1	-2.10789	10.5156	-4.08205	0.00111878	0.00483958	-1.38244
4784_at	YGR218W	CRM1	-2.10775	3.14327	-7.45661	3.05841e-06	6.89619e-05	4.6602
6698_at	YDL210W	UGA4	2.10747	8.44458	2.65636	0.0187827	0.0492519	-4.17531
7190_i_at	YBR189W	RPS9AorRPS9B	2.10653	9.40373	9.99395	9.33548e-08	5.00843e-06	8.23373
5957_at	YDR533C	HSP31	2.10648	10.75	5.29255	0.000113352	0.000858997	0.948422
9035_at	YNL178W	RPS3	2.10528	4.32065	3.34898	0.00476833	0.0158464	-2.83463
7452_at	YBL089W	AVT5	-2.10516	10.6212	-4.65053	0.000373832	0.00207969	-0.270457
9180_at	YNL304W	YPT11	2.10488	7.80675	3.39751	0.00432937	0.0146007	-2.73878
8865_at	YNR017W	MAS6	2.10433	6.34012	3.87326	0.00168573	0.00672203	-1.79563
10446_s_at	YKL199C	PTK1	2.10341	5.8883	3.92084	0.00153494	0.00622713	-1.70134
4574_at	YHL034C	SBP1	2.1027	8.16296	3.96651	0.00140312	0.00579091	-1.6109
11138_at	YJL109C	UTP10	-2.10239	6.15193	-2.33397	0.0350012	0.0833299	-4.76703
4748_at	YGR272C	NA	2.10231	5.88327	3.38553	0.00443378	0.0149097	-2.76244
10376_at	YLL054C	NA	-2.1011	6.96597	-2.72685	0.0163614	0.0437758	-4.0424
9564_at	YMR078C	CTF18	-2.1007	9.17303	-6.41581	1.60463e-05	0.000217405	2.95552
5227_at	YGL198W	YIP4	2.10059	8.64568	6.11309	2.67145e-05	0.000310174	2.43151
5786_f_at	YEL049W	PAU4orPAU6orPAU1orPAU2orDAN3	2.10023	7.54364	5.86091	4.12445e-05	0.000421275	1.98532
5251_f_at	YGL261C	PAU4orPAU6orPAU1orPAU2orDAN3	2.09999	8.12714	5.81588	4.46115e-05	0.000444448	1.90474
8983_s_at	YNL140C	RLR1	-2.09967	6.48486	-2.99411	0.00965571	0.0281763	-3.52983
6668_at	YDL195W	SEC31	-2.0994	5.38622	-3.20449	0.00635718	0.0199375	-3.11913
6244_at	YDR233C	RTN1	2.09896	7.95914	8.82074	4.28637e-07	1.57532e-05	6.67703
4775_at	YGR210C	NA	2.09867	8.45849	3.43961	0.00398144	0.0136442	-2.6555
4926_at	YGR090W	UTP22	-2.09843	3.49882	-5.1473	0.0001478	0.00105241	0.67681
4453_at	YHR072W	ERG7	-2.09561	7.63983	-2.16465	0.0481658	0.109292	-5.06459
7409_at	YBL043W	ECM13	2.09551	7.32307	3.67521	0.0024935	0.00924412	-2.1885
10947_at	YJR063W	RPA12	2.09519	6.50612	5.04234	0.000179353	0.00122119	0.47894
7435_at	YBL061C	SKT5	-2.09502	6.99295	-5.28914	0.000114057	0.000862917	0.94208
4882_g_at	YGR136W	LSB1	2.09456	7.29357	5.86374	4.10422e-05	0.000420098	1.99037
10282_at	YLR073C	NA	2.09381	6.93444	5.16705	0.000142541	0.00102671	0.71388
5337_at	YFR038W	NA	-2.09377	5.85676	-4.14704	0.000985438	0.00439306	-1.2542
5637_at	YER066W	NA	2.09234	7.41357	5.18715	0.000137385	0.000998044	0.75158
8219_at	YOR329C	SCD5	-2.09189	4.8096	-3.09475	0.00790733	0.0238555	-3.33399
6835_at	YCR047C	BUD23	2.09187	6.4663	5.58876	6.656e-05	0.000587275	1.49411
10700_at	YKL128C	PMU1	2.09154	9.58156	5.52389	7.4715e-05	0.000640463	1.37557
10535_at	YKR018C	NA	-2.09151	9.36467	-2.83535	0.013217	0.0365203	-3.83581
2723_s_at	NA	NA	-2.09136	3.59515	-4.70592	0.000336582	0.0019234	-0.163537
9454_at	YMR184W	NA	2.08988	6.28797	4.67789	0.00035493	0.00199595	-0.217614
8425_s_at	YOR133W	EFT1orEFT2	-2.08967	7.18789	-4.28691	0.000750885	0.00355632	-0.979032
11060_at	YJL052W	TDH1	2.08967	9.28981	5.27277	0.000117504	0.000883883	0.911589
10217_at	YLR098C	CHA4	-2.08951	7.00008	-3.58849	0.0029616	0.0106088	-2.36054
3607_f_at	NA	NA	-2.0894	3.59902	-4.68964	0.000347117	0.0019687	-0.19494
4135_at	YIL036W	CST6	-2.0878	6.52375	-3.63551	0.0026977	0.00984097	-2.26726
5112_at	YGL085W	NA	2.0878	5.89832	4.14425	0.000990822	0.00441284	-1.25971
4353_at	YHR193C	EGD2	2.08745	9.13888	5.15403	0.000145986	0.00104188	0.689448
10234_at	YLR115W	CFT2	-2.08714	9.23509	-3.61952	0.00278465	0.0100804	-2.29898
4394_at	YHR144C	DCD1	2.08692	10.9106	6.81945	8.29295e-06	0.00013591	3.63437
5694_at	YER039C	HVG1	2.08651	7.62754	5.96804	3.42588e-05	0.000370145	2.17593
6395_at	YDR071C	PAA1	2.08532	5.67381	4.91363	0.000227814	0.00145521	0.23459
4837_at	YGR182C	NA	2.0853	7.42376	5.34179	0.000103667	0.000806922	1.03991
6489_at	YDL018C	ERP3	2.08487	6.56433	3.96739	0.00140069	0.00579073	-1.60915
3700_f_at	NA	NA	-2.08446	3.65871	-3.54886	0.00320409	0.0113511	-2.43911
8895_at	YNL047C	SLM2	-2.08339	6.5334	-3.29657	0.00529267	0.0172933	-2.938
6839_at	YCR051W	NA	2.08156	6.02192	4.91962	0.00022528	0.00144834	0.246009
4603_at	NA	NA	2.07679	7.67668	3.2779	0.00549307	0.0178296	-2.97478
10104_at	YLR212C	TUB4	2.07584	6.74781	2.11247	0.0530756	0.118475	-5.1541
11017_at	YJL004C	SYS1	2.07567	7.03647	4.58757	0.000421379	0.00227349	-0.392332
10594_at	YKL013C	ARC19	2.07387	4.06433	4.97874	0.0002018	0.00133414	0.358431
4969_at	YGR043C	NA	2.0735	7.38254	7.62967	2.35383e-06	5.67779e-05	4.92935
10127_at	YLR192C	HCR1	2.07251	5.56358	6.16376	2.45079e-05	0.000292559	2.52011
10652_at	YKL087C	CYT2	2.07204	7.52207	5.36895	9.86955e-05	0.000778622	1.09025
9743_at	YML100W	TSL1	-2.07054	5.59996	-3.39516	0.00434967	0.0146586	-2.74342
11061_g_at	YJL052W	TDH2orTDH1orTDH3	2.0705	10.3404	5.26114	0.000120018	0.000898452	0.889911
7243_at	YBR107C	IML3	2.06937	6.19914	4.87393	0.000245361	0.00152697	0.158838
7800_at	YPL043W	NOP4	-2.06851	5.04869	-5.42914	8.85468e-05	0.000726348	1.20144
7309_at	YBR041W	FAT1	-2.06736	9.14612	-4.68049	0.000353183	0.00198972	-0.212588
2884_g_at	NA	NA	-2.06566	5.08705	-5.2314	0.000126708	0.000938	0.834381
5146_at	YGL143C	MRF1	2.06484	8.379	6.24776	2.12611e-05	0.000265338	2.66619
8964_at	YNL112W	DBP2	-2.06425	5.93466	-2.58951	0.0213976	0.0548604	-4.30032
4754_at	YGR234W	YHB1	2.06307	10.3324	10.4292	5.48979e-08	3.41648e-06	8.77368
6561_at	YDL081C	RPP1A	2.06243	5.0658	7.21415	4.44241e-06	8.58272e-05	4.27636
4816_at	YGR206W	NA	2.06235	4.65391	3.87171	0.00169088	0.00673395	-1.7987
8338_at	YOR226C	ISU2	2.06185	6.98791	5.39803	9.36486e-05	0.000754279	1.14403
11249_f_at	YJL223C	PAU4orPAU6orPAU1orPAU2orDAN3	2.06181	8.80117	6.56467	1.25468e-05	0.00018385	3.2085
11034_at	YJL033W	HCA4	-2.06172	6.92423	-4.28086	0.000759736	0.00358562	-0.990907
4692_f_at	NA	NA	-2.06143	10.9778	-6.00725	3.20218e-05	0.000353755	2.2453
10987_at	YJR058C	APS2	2.06118	5.13154	6.01178	3.17729e-05	0.000352257	2.25332
10274_at	YLR065C	NA	2.06079	8.57644	6.13304	2.58218e-05	0.000304176	2.46644
3014_at	NA	NA	-2.05962	4.0221	-4.02453	0.00125213	0.00528319	-1.4961
5373_at	YFL013C	IES1	-2.05791	7.24115	-2.46119	0.0274328	0.0677833	-4.53706
7671_at	YPR095C	SYT1	-2.05778	3.36651	-4.87971	0.000242721	0.00151457	0.169881
6218_at	YDR253C	MET32	2.0575	7.02911	6.21018	2.26541e-05	0.000277892	2.60096
9865_f_at	YLR461W	PAU4orPAU6orPAU1orPAU2orDAN3	2.05737	8.66462	7.3041	3.86442e-06	8.01595e-05	4.41969
4341_at	YHR181W	NA	2.05637	7.64066	6.81795	8.31302e-06	0.00013591	3.63188
10669_at	YKL115C	PRR1	2.05569	7.64912	5.83751	4.29597e-05	0.000433213	1.94348
4443_at	YHR105W	YPT35	2.05463	4.28638	4.37181	0.000637252	0.0031129	-0.812643
11260_at	YJL212C	OPT1	-2.05434	7.5274	-3.84715	0.00177476	0.00698579	-1.84738
7153_at	YBR197C	NA	2.05368	6.58699	5.7707	4.82806e-05	0.000465599	1.82359
5240_at	YGL229C	SAP4	-2.0508	7.49559	-3.08017	0.00813976	0.0244684	-3.36244
7393_at	YBL014C	RRN6	-2.05062	8.93298	-1.37638	0.190301	0.34371	-6.27027
7377_at	YBL028C	NA	2.04893	5.76017	5.3904	9.49463e-05	0.00076014	1.12993
5681_at	YER026C	CHO1	2.04805	7.80976	7.27675	4.03127e-06	8.15161e-05	4.37623
7735_at	YPR028W	YOP1	2.04803	6.11022	5.73622	5.1291e-05	0.000485108	1.7615
10210_at	YLR136C	TIS11	2.04732	8.48371	5.05256	0.000175993	0.00120095	0.498267
4513_at	YHR039C	MSC7	-2.0464	5.37148	-4.5689	0.000436651	0.00233322	-0.428553
9065_at	YNL194C	NA	2.04604	5.16535	9.59875	1.53567e-07	7.16773e-06	7.72638
6612_at	YDL119C	NA	2.04568	5.3308	8.99649	3.38019e-07	1.34726e-05	6.92016
10944_at	YJR060W	CBF1	2.04482	7.72658	3.27856	0.00548586	0.0178124	-2.97348
5151_at	YGL138C	NA	2.0438	8.87757	6.92271	7.0294e-06	0.000120403	3.80439
5393_at	YFL038C	YPT1	2.04335	4.32016	3.74513	0.00217107	0.00826546	-2.04975
4565_at	YHL043W	ECM34	2.04082	6.18385	5.08549	0.000165609	0.00114346	0.560451
9370_at	YMR276W	DSK2	2.04035	7.02272	4.46799	0.000529625	0.00268991	-0.624807
10717_at	YKL156W	RPS27A	2.04012	8.53742	5.27921	0.000116135	0.00087509	0.923584
11363_at	YAL045C	NA	2.03801	6.11355	6.86407	7.71989e-06	0.000128688	3.70802
3180_f_at	NA	NA	-2.03797	3.69884	-3.67229	0.00250796	0.00927934	-2.19429
4101_at	YIL024C	NA	2.03775	7.09421	4.89535	0.000235727	0.00148784	0.199728
6495_at	YDL012C	NA	2.03739	7.49162	4.9113	0.000228808	0.00145796	0.230146
9691_i_at	YML063W	RPS1BorRPS1A	2.03546	7.98875	4.64012	0.000381291	0.00210862	-0.290576
6794_at	YCR099C	NA	2.03501	5.37681	4.30861	0.000720002	0.00342919	-0.936464
5400_at	YFL030W	AGX1	-2.03419	8.24322	-4.68404	0.000350814	0.00198322	-0.205732
9522_at	YMR123W	PKR1	2.03415	6.22266	4.26281	0.000786792	0.0036834	-1.02636
9547_at	YMR105C	PGM2	-2.03384	9.88322	-5.40673	9.21911e-05	0.000745757	1.16011
4183_at	YIL083C	NA	2.0335	10.5207	5.78769	4.6865e-05	0.00045662	1.85415
5623_at	YER093C-A	NA	2.03349	7.07363	4.16728	0.000947327	0.00424954	-1.21431
5919_at	YDR540C	NA	2.03282	5.40527	7.03815	5.85311e-06	0.000104672	3.99274
10030_at	YLR315W	NKP2	2.03269	5.04878	4.3341	0.000685371	0.00330131	-0.886485
7386_at	YBL021C	HAP3	2.03263	7.98376	5.65606	5.90745e-05	0.000537831	1.61651
5816_at	YEL066W	HPA3	2.03214	6.26686	4.32652	0.00069549	0.00333628	-0.901347
8462_at	YOR081C	NA	-2.03196	9.86858	-2.88448	0.0119954	0.0335763	-3.74155
5624_at	YER093C-A	NA	2.03119	6.34972	4.76526	0.000300906	0.0017812	-0.0493362
8373_at	YOR171C	LCB4	-2.03113	6.86666	-4.31087	0.000716853	0.00341768	-0.93202
4387_at	YHR138C	NA	2.03001	6.54878	4.87815	0.000243431	0.00151799	0.1669
8493_at	YOR065W	CYT1	2.03001	6.07991	6.21136	2.26088e-05	0.000277702	2.60301
8330_at	YOR219C	STE13	-2.02972	6.37341	-3.46334	0.00379787	0.0130923	-2.60854
6321_at	YDR175C	RSM24	2.02686	9.86404	7.0763	5.51157e-06	0.000100489	4.05458
3672_f_at	NA	NA	-2.02622	3.76854	-3.15635	0.00699599	0.0215964	-3.21353
9754_at	YML091C	RPM2	-2.02605	4.20277	-2.09997	0.0543185	0.120728	-5.17537
10677_at	YKL107W	NA	2.02536	7.82112	5.50813	7.68488e-05	0.00065276	1.3467
10186_s_at	YLR156W	NA	2.02461	6.84744	7.05563	5.69395e-06	0.000102414	4.0211
11432_at	NA	NA	-2.02456	5.10634	-6.23943	2.15619e-05	0.000268017	2.65175
9554_at	YMR069W	NAT4	2.0235	9.03296	5.4168	9.05344e-05	0.000738112	1.17869
10777_at	YKL186C	MTR2	2.02324	7.73623	4.67376	0.000357716	0.00200798	-0.225577
4092_at	YIR011C	STS1	2.02292	10.0227	4.37243	0.000636491	0.00311081	-0.81143
9745_at	YML099C	ARG81	-2.02265	6.10364	-5.02393	0.000185568	0.00125527	0.444119
5215_at	YGL210W	YPT32	2.02182	5.18438	4.43755	0.000561501	0.00281958	-0.684175
10031_at	YLR316C	TAD3	2.02127	8.30473	5.53525	7.3215e-05	0.00063225	1.39637
10412_f_at	YLL064C	PAU4orPAU6orPAU1orPAU2orDAN3	2.02112	7.70921	6.07459	2.85295e-05	0.000325181	2.36395
6327_at	YDR137W	RGP1	-2.02064	9.66338	-3.37802	0.00450058	0.0150909	-2.77729
10390_at	YLL041C	SDH2	2.02038	9.50273	5.7294	5.191e-05	0.00048997	1.74919
5735_at	YEL011W	GLC3	-2.02037	7.91776	-4.83407	0.000264387	0.001611	0.082626
4115_at	YIL010W	DOT5	2.02012	4.83778	3.52785	0.0033407	0.0117734	-2.48076
11226_at	YJL200C	NA	-2.01931	9.55982	-4.6795	0.000353847	0.00199226	-0.214502
2115_at	NA	NA	-2.01858	3.05119	-7.30197	3.87715e-06	8.01595e-05	4.41631
6961_g_at	YCL065W	MATALPHA1orHMLALPHA1	2.01835	7.21659	8.46153	7.03972e-07	2.29883e-05	6.16863
7290_at	YBR067C	TIP1	2.01709	8.27162	3.96674	0.00140248	0.00579091	-1.61044
8637_at	YOL060C	MAM3	-2.01517	6.51726	-3.23951	0.00592924	0.018897	-3.05033
10089_at	YLR241W	NA	-2.0147	5.59987	-1.84471	0.0863204	0.179027	-5.59445
4172_at	YIL094C	LYS12	2.01179	7.9655	4.51126	0.000487477	0.0025253	-0.540529
9560_at	YMR075W	NA	-2.01143	5.43972	-4.62371	0.000393373	0.00215881	-0.322333
7206_at	YBR160W	CDC28	2.0104	7.43092	3.15173	0.0070606	0.0217671	-3.22258
4071_at	YIR035C	NA	2.00917	9.73424	5.53155	7.36994e-05	0.000634671	1.38961
5717_at	YER017C	AFG3	-2.00882	9.56334	-4.33577	0.000683165	0.00329238	-0.883216
5410_f_at	YFL020C	PAU5orPAU7	2.00804	7.69229	6.34504	1.80567e-05	0.00023462	2.83414
8476_at	YOR094W	ARF3	2.00776	6.93219	6.71235	9.85903e-06	0.000153167	3.45645
7769_at	YPL029W	SUV3	-2.0077	10.287	-3.19786	0.00644156	0.0201515	-3.13214
7674_at	YPR098C	NA	2.00739	6.64917	5.11924	0.000155627	0.00109643	0.624028
11372_at	YAL037W	NA	2.00733	7.12931	4.4726	0.000524957	0.00267201	-0.615812
7811_at	YPL079W	RPL21BorRPL21A	2.00675	9.45344	4.45974	0.000538068	0.00272095	-0.640876
10011_at	YLR296W	NA	2.00391	6.03913	4.86822	0.000247996	0.00153721	0.147938
2148_at	NA	NA	-2.00385	6.28048	-4.23595	0.000828892	0.00383055	-1.07915
4771_at	YGR251W	NA	2.00346	7.54714	5.92367	3.69883e-05	0.000390595	2.09718
2497_s_at	NA	NA	-2.0034	3.81236	-7.42771	3.19629e-06	7.08906e-05	4.61486
5315_at	NA	NA	-2.00336	6.17621	-4.02919	0.00124074	0.0052463	-1.48688
5304_at	YFR050C	PRE4	2.00262	7.75191	6.17188	2.41728e-05	0.00028967	2.53426
10321_at	YLR025W	SNF7	2.0026	5.7062	5.10155	0.000160778	0.00112089	0.59072
6684_at	YDL181W	INH1	2.00213	4.44486	4.4851	0.000512526	0.00261587	-0.591461
6575_at	YDL111C	RRP42	2.00186	5.57118	4.89966	0.000233834	0.00148089	0.207962
2778_g_at	NA	NA	2.00146	5.84854	5.34438	0.000103181	0.000805429	1.04471
8327_at	YOR216C	RUD3	-2.00136	5.91796	-5.26824	0.000118476	0.000889049	0.903149
10238_at	YLR074C	BUD20	2.00083	5.22903	4.26121	0.000789239	0.00369116	-1.02951
7237_at	YBR146W	MRPS9	2.00057	5.9777	5.5051	7.72664e-05	0.000655116	1.34114
6388_at	YDR108W	GSG1	-1.99829	9.13126	-3.2559	0.00573899	0.01848	-3.0181
8475_at	YOR093C	NA	-1.99824	3.97044	-5.01927	0.00018718	0.00126252	0.435279
9995_at	YLR326W	NA	1.99809	7.63763	5.67481	5.71495e-05	0.000524058	1.6505
5973_at	YDR504C	SPG3	1.9978	6.58005	6.7381	9.45611e-06	0.000148607	3.49937
6560_at	YDL082W	RPL13BorRPL13A	1.99734	8.78545	4.49113	0.000506641	0.00259577	-0.579724
11004_at	YJR030C	NA	-1.99706	9.04716	-2.38038	0.0320357	0.0774949	-4.68373
4327_at	NA	NA	-1.99671	3.88063	-6.70024	1.00548e-05	0.000154887	3.43623
8204_at	YOR360C	PDE2	-1.99575	6.95271	-2.73187	0.016201	0.0434213	-4.03289
10972_at	YJR043C	POL32	1.99562	4.63553	6.28885	1.98403e-05	0.000253018	2.7373
10691_at	YKL094W	YJU3	1.99538	8.67413	5.96267	3.45772e-05	0.000372723	2.16643
2739_g_at	NA	NA	-1.99537	3.4726	-4.32914	0.000691977	0.00332455	-0.896213
9888_at	YLR440C	SEC39	-1.99511	7.79933	-2.6266	0.0199063	0.0516589	-4.2311
11248_s_at	YJL225C	YRF1-5orYRF1-7orYRF1-6orYRF1-3orYRF1-2orYRF1-1	1.99449	7.96386	5.4589	8.39344e-05	0.000697668	1.25628
5256_at	YGL257C	MNT2	-1.99435	6.17159	-3.40048	0.00430382	0.0145303	-2.7329
10374_at	YLL056C	NA	1.9942	9.07754	5.68604	5.60279e-05	0.00051733	1.67084
7349_at	YBR035C	PDX3	1.99411	9.16407	4.75349	0.000307658	0.00180689	-0.0719599
6044_at	YDR437W	NA	1.99405	6.19117	6.32145	1.8784e-05	0.000241527	2.79354
4351_at	YHR191C	CTF8	1.99334	6.47677	4.57191	0.000434148	0.00232517	-0.422706
2280_s_at	NA	NA	-1.99298	3.11849	-2.8429	0.0130217	0.0360813	-3.82136
4755_at	YGR235C	NA	1.99166	6.64882	5.85713	4.1517e-05	0.000423102	1.97856
3587_f_at	NA	NA	-1.9916	4.81256	-7.28513	3.97935e-06	8.07703e-05	4.38956
4751_at	YGR231C	PHB2	1.99037	8.09369	4.77891	0.00029327	0.00174374	-0.0231272
5025_at	YGL037C	PNC1	1.98626	7.47368	6.11443	2.66536e-05	0.000309853	2.43385
5188_at	YGL191W	COX13	1.98525	7.59961	5.44988	8.53058e-05	0.000706022	1.23966
6442_at	YDR028C	REG1	-1.98517	3.90928	-3.99143	0.00133612	0.00557563	-1.56158
11399_s_at	NA	NA	-1.98488	7.80176	-4.51257	0.000486257	0.00252318	-0.537981
2925_s_at	NA	NA	-1.98346	4.50593	-2.65703	0.0187584	0.0492157	-4.17407
4986_at	YGR013W	SNU71	-1.98321	10.1665	-4.89658	0.000235184	0.00148642	0.202084
11082_at	YJL075C	NA	1.98262	5.80717	5.1132	0.000157366	0.00110535	0.612661
2848_s_at	NA	NA	-1.9823	3.56015	-4.5527	0.00045036	0.00239141	-0.459998
10523_at	YKR051W	NA	1.98165	10.042	5.95391	3.51042e-05	0.000376231	2.15089
7071_s_at	YBR298C	MAL31	-1.98154	9.56004	-4.44508	0.000553433	0.00278657	-0.669476
2882_at	NA	NA	-1.97954	6.63784	-4.20858	0.000874169	0.00399431	-1.13299
8819_at	YNR060W	FRE4	-1.97931	8.7393	-2.59604	0.0211275	0.0542721	-4.28815
6087_at	YDR390C	UBA2	-1.9793	6.03491	-3.97743	0.00137334	0.00570037	-1.58928
2956_g_at	NA	NA	1.97913	3.69767	5.171	0.000141511	0.00102087	0.721299
9421_s_at	YMR194W	RPL36AorRPL36B	1.97891	8.05334	5.63793	6.10007e-05	0.000550717	1.58359
7462_at	YBL080C	PET112	1.97881	7.4371	4.99228	0.000196786	0.00130747	0.384138
8671_at	YOL117W	RRI2	-1.97788	7.97319	-2.74167	0.0158924	0.0427661	-4.01432
7211_at	YBR164C	ARL1	1.97702	8.44247	4.8844	0.000240602	0.0015065	0.178834
7457_at	YBL084C	CDC27	-1.97648	5.99413	-3.23235	0.00601439	0.0191292	-3.06441
7598_at	YPR155C	NCA2	-1.97594	8.17944	-2.90561	0.0115047	0.0325445	-3.70088
9126_at	YNL268W	LYP1	-1.97515	7.96685	-4.46678	0.000530853	0.00269468	-0.62716
4209_at	YIL101C	XBP1	-1.97478	5.67307	-9.04746	3.15719e-07	1.287e-05	6.98999
7198_at	YBR152W	SPP381	1.9739	3.8027	7.34332	3.63773e-06	7.70028e-05	4.48185
10121_at	YLR229C	CDC42	1.97232	7.6395	5.12046	0.000155276	0.00109479	0.626334
4175_at	YIL091C	NA	-1.97139	5.77636	-3.33527	0.00490031	0.0161927	-2.8617
11008_at	YJR034W	PET191	1.97126	4.77849	6.21274	2.25564e-05	0.000277423	2.6054
3915_s_at	NA	NA	-1.9708	8.65692	-2.18196	0.0466331	0.106176	-5.03466
4420_at	YHR126C	NA	1.97053	4.42144	3.32823	0.00496941	0.016392	-2.87558
5629_at	YER098W	UBP9	-1.96986	7.6275	-2.08313	0.0560356	0.123985	-5.20393
6345_at	YDR154C	CPR1	1.96896	6.09714	5.42387	8.93902e-05	0.000730059	1.19173
3184_s_at	YIL177C	YRF1-5orYRF1-7orYRF1-6orYRF1-3orYRF1-2orYRF1-1	1.96827	8.71992	3.50029	0.0035288	0.0123237	-2.53536
7581_at	YPR183W	DPM1	1.96663	6.2322	5.11138	0.000157893	0.00110822	0.609243
9344_at	YMR294W	JNM1	1.96661	5.58645	4.72464	0.000324882	0.00187904	-0.127485
7708_f_at	YPR043W	RPL43A	1.96627	9.33035	5.06264	0.000172746	0.00118311	0.517308
4785_at	YGR219W	NA	1.96569	9.08604	4.66618	0.000362897	0.00203096	-0.240224
10018_at	YLR303W	MET17	1.96565	9.42193	5.49546	7.86113e-05	0.000663505	1.32345
10481_at	YKR100C	SKG1	1.9651	6.09318	4.5509	0.000451904	0.00239377	-0.46348
9697_at	YML058C-A	NA	-1.9648	7.03098	-4.10801	0.00106343	0.00466847	-1.33119
10735_at	YKL138C	MRPL31	1.96408	3.95265	5.25262	0.000121897	0.000908147	0.874007
10693_at	YKL135C	APL2	-1.9635	7.74041	-4.41477	0.000586637	0.00290716	-0.728644
9451_at	YMR181C	NA	1.96307	4.23921	3.7761	0.00204209	0.00784805	-1.98831
7766_at	YPL032C	SVL3	-1.96289	8.25935	-3.62248	0.00276836	0.010036	-2.29311
4072_at	YIR036C	NA	1.96241	8.11081	4.4183	0.000582667	0.00289489	-0.72175
3387_f_at	NA	NA	-1.96153	3.80281	-3.50037	0.00352825	0.0123237	-2.53521
5031_at	YGL031C	RPL24A	1.96131	4.74751	4.07685	0.00113022	0.00488226	-1.39271
4911_at	YGR075C	PRP38	1.96043	6.17283	4.76214	0.000302682	0.00178719	-0.0553381
6456_at	YDR041W	RSM10	1.96006	5.39699	7.18515	4.64758e-06	8.81812e-05	4.22993
6270_at	YDR213W	UPC2	-1.95949	7.03889	-5.68501	5.613e-05	0.000517761	1.66897
10273_at	YLR064W	NA	1.95929	9.2514	7.43241	3.17339e-06	7.08906e-05	4.62225
7580_at	YPR182W	SMX3	1.95886	5.08945	5.23901	0.00012496	0.000926527	0.848604
6554_at	YDL087C	LUC7	1.95843	6.77265	3.68766	0.00243272	0.00906927	-2.16379
9887_at	YLR439W	MRPL4	1.956	8.35306	3.81444	0.00189312	0.00738032	-1.91226
2276_at	NA	NA	-1.95508	6.96179	-3.59319	0.00293408	0.0105304	-2.35122
7822_at	YPL067C	NA	1.95477	6.93561	5.20706	0.000132469	0.000971403	0.788871
4934_at	YGR053C	NA	1.95472	6.84177	5.05272	0.000175942	0.00120095	0.498564
10653_at	YKL086W	SRX1	1.95466	7.81413	4.56769	0.000437654	0.00233591	-0.430887
5767_at	YEL023C	NA	-1.95435	7.11331	-3.07944	0.00815151	0.024485	-3.36386
7933_at	YPL182C	NA	-1.9541	7.01744	-5.59333	6.60211e-05	0.000583073	1.50245
8927_at	YNL061W	NOP2	-1.95335	3.45765	-3.63192	0.00271699	0.0099036	-2.27439
4164_at	YIL053W	RHR2	1.9533	9.60613	4.53336	0.000467303	0.00245071	-0.497556
9631_at	YMR009W	NA	1.95308	5.51082	4.47126	0.000526311	0.00267599	-0.61843
4855_at	YGR154C	NA	1.95299	7.58819	6.16948	2.42714e-05	0.000290479	2.53008
3658_f_at	NA	NA	-1.95188	5.58057	-4.02658	0.0012471	0.00526801	-1.49204
8232_at	YOR299W	BUD7	-1.95137	8.1783	-3.27194	0.00555864	0.0180048	-2.98652
10231_at	YLR112W	NA	1.95026	6.01485	5.28729	0.000114442	0.000864337	0.938621
7829_at	YPL060W	LPE10	-1.94993	4.58239	-4.88104	0.000242116	0.00151181	0.172431
6622_at	YDL153C	SAS10	-1.94966	8.33302	-5.52514	7.45483e-05	0.000639622	1.37786
4437_at	YHR100C	NA	1.9493	5.13162	4.04096	0.00121247	0.00515174	-1.46362
6017_at	YDR458C	NA	-1.94917	5.05378	-4.68698	0.000348871	0.00197496	-0.200074
8530_g_at	YOR012W	NA	1.94881	7.92163	5.59333	6.60212e-05	0.000583073	1.50245
6844_at	YCR059C	YIH1	1.94785	4.99607	3.69889	0.00237922	0.00891912	-2.14152
6074_at	YDR377W	ATP17	1.9457	6.5451	4.60545	0.000407272	0.00221426	-0.357677
4876_at	YGR131W	NA	1.94567	8.55559	5.09215	0.000163588	0.0011337	0.573003
10520_at	YKR048C	NAP1	1.94559	8.37938	4.61154	0.000402584	0.00219645	-0.345895
5355_at	YFR013W	IOC3	-1.94521	4.6989	-3.59872	0.00290201	0.0104368	-2.34024
5044_at	YGL018C	JAC1	1.94279	6.83195	5.85511	4.16633e-05	0.000424129	1.97495
7944_at	YPL171C	OYE3	1.94272	9.86397	7.98785	1.3855e-06	3.75868e-05	5.47382
10350_at	YLR008C	PAM18	1.94101	7.21449	6.48653	1.4271e-05	0.000199729	3.07608
5144_at	YGL145W	TIP20	-1.94078	7.11645	-2.63035	0.0197611	0.0513558	-4.22407
9621_at	YML002W	NA	-1.94052	8.54803	-2.92047	0.0111717	0.0318048	-3.67225
8549_at	YOL013C	HRD1	-1.94038	8.18812	-1.88007	0.0810499	0.170183	-5.53826
2579_at	NA	NA	-1.93984	4.55372	-6.36123	1.75745e-05	0.000229778	2.86198
9679_at	YML031W	NDC1	-1.93965	6.79304	-2.61436	0.0203871	0.0527477	-4.25398
5259_at	YGL254W	FZF1	1.93963	5.82831	8.3768	7.93067e-07	2.49775e-05	6.04641
5301_at	YFR047C	BNA6	1.93953	9.24769	5.36987	9.85319e-05	0.000778169	1.09195
5372_at	YFL014W	HSP12	1.93902	5.93418	3.63512	0.00269982	0.00984486	-2.26805
6468_at	YDR007W	TRP1	1.93858	6.62873	4.30741	0.000721663	0.003435	-0.9388
8390_at	YOR143C	THI80	-1.93846	7.41084	-6.20431	2.28802e-05	0.000279563	2.59075
4174_at	YIL092W	NA	-1.93844	7.3039	-3.43675	0.00400421	0.0136971	-2.66118
7258_at	YBR122C	MRPL36	1.9381	4.62795	5.36576	9.92667e-05	0.000780669	1.08434
4466_at	YHR084W	STE12	-1.93618	4.06231	-4.07448	0.00113547	0.00489817	-1.39739
8201_at	YOR357C	GRD19	1.93616	5.22908	5.699	5.47628e-05	0.0005107	1.69428
10714_at	YKL159C	RCN1	1.93559	6.15978	4.27649	0.000766197	0.00360325	-0.999488
5193_at	YGL187C	COX4	1.93496	4.56536	4.40459	0.000598241	0.00295793	-0.748529
8786_f_at	YNR076W	PAU4orPAU6orPAU1orPAU2orDAN3	1.93487	8.03532	6.1273	2.60756e-05	0.000306183	2.45638
7486_at	YBL100C	NA	1.93298	6.52149	6.19287	2.33277e-05	0.000282443	2.57084
10941_at	YJR102C	VPS25	1.93282	8.17107	5.85331	4.17938e-05	0.000424995	1.97174
10570_at	YKR007W	MEH1	1.93217	5.2425	5.66917	5.77222e-05	0.000527237	1.64027
10776_at	YKL187C	NA	-1.93194	5.93455	-2.94735	0.010593	0.0304075	-3.62036
8638_at	YOL105C	WSC3	1.93147	5.29897	5.67289	5.73441e-05	0.000524811	1.64702
10182_at	YLR152C	NA	-1.93073	8.11878	-3.75662	0.00212231	0.00810628	-2.02697
7404_at	YBL048W	NA	1.93064	5.21363	4.88702	0.000239426	0.00150197	0.183836
3093_f_at	NA	NA	-1.93004	3.61744	-2.72098	0.016551	0.0442183	-4.05351
8892_at	YNL050C	NA	1.92987	8.15771	5.3064	0.000110537	0.000842677	0.974177
10275_at	YLR066W	SPC3	1.92977	6.86866	6.49806	1.40016e-05	0.000197439	3.09568
6391_at	YDR067C	NA	1.92918	6.45361	5.88656	3.94465e-05	0.000410516	2.0311
8718_at	YOL163W	NA	1.92849	4.83227	3.57809	0.00302337	0.0108052	-2.38116
8233_g_at	YOR299W	BUD7	-1.9269	8.69217	-3.78848	0.00199273	0.00769885	-1.96375
9011_at	YNL157W	NA	1.92672	7.27108	4.42722	0.000572755	0.0028587	-0.704329
8722_at	YOL159C	NA	1.92648	6.68292	5.10417	0.000160004	0.00111632	0.595661
6343_at	YDR152W	GIR2	1.92633	4.64843	3.8875	0.00163906	0.00656681	-1.7674
7721_at	YPR014C	NA	1.92608	4.98725	6.00269	3.22735e-05	0.000354624	2.23726
8341_at	YOR229W	WTM2	1.92566	8.53822	4.09307	0.00109495	0.00475961	-1.36069
2994_s_at	NA	NA	-1.92549	2.90966	-10.3596	5.96963e-08	3.61528e-06	8.68855
2294_f_at	NA	NA	-1.92522	7.48912	-2.91517	0.0112894	0.0321007	-3.68247
4563_f_at	YHL046C	PAU4orPAU6orPAU1orPAU2orDAN3	1.92374	8.73893	7.41241	3.27192e-06	7.1363e-05	4.59082
6382_at	YDR102C	NA	1.92221	4.4548	4.69124	0.000346063	0.00196502	-0.19184
4740_at	YGR264C	MES1	-1.92176	9.32315	-4.49549	0.000502425	0.00258552	-0.57123
4508_at	YHR034C	PIH1	1.92169	5.27409	4.72475	0.000324811	0.00187904	-0.127261
6207_at	YDR287W	NA	1.92118	8.39077	4.0834	0.00111583	0.00483128	-1.37977
9170_at	YNL314W	DAL82	1.91954	5.6352	3.51821	0.00340531	0.0119641	-2.49986
8531_at	YOR013W	NA	1.91952	7.41362	6.70657	9.95192e-06	0.000154065	3.4468
10804_at	YKL208W	CBT1	1.91932	7.49795	5.37618	9.74149e-05	0.000774589	1.10363
4056_at	YIR020C	NA	1.91751	4.6562	4.5799	0.000427585	0.00229661	-0.407208
5220_at	YGL205W	POX1	-1.91556	9.63495	-3.34226	0.00483254	0.0160084	-2.84789
10185_s_at	YLR155C	ASP3-4orASP3-3orASP3-2orASP3-1	1.91553	10.5217	8.70375	5.03007e-07	1.7391e-05	6.51315
10101_at	YLR209C	PNP1	1.91549	10.5763	7.46917	3.00041e-06	6.8148e-05	4.67988
4792_at	YGR226C	NA	1.91475	7.25735	4.00152	0.00130991	0.00548753	-1.54161
2162_g_at	NA	NA	1.91458	6.59791	4.62417	0.000393026	0.00215818	-0.321436
10061_at	YLR259C	HSP60	-1.91397	9.91304	-3.45789	0.00383926	0.0132103	-2.61933
10752_at	YKL167C	MRP49	1.91373	5.42833	4.49949	0.00049859	0.00257004	-0.563442
11085_at	YJL072C	PSF2	1.91287	6.58011	4.25548	0.000798052	0.00372305	-1.04075
3403_f_at	YDR542W	PAU4orPAU6orPAU1orPAU2orDAN3	1.91055	8.47275	5.83463	4.31763e-05	0.000433844	1.93832
4367_at	YHR162W	NA	1.90993	4.3298	7.00127	6.20457e-06	0.000109905	3.93277
5140_at	YGL149W	NA	1.90991	6.06467	5.13097	0.000152305	0.00107791	0.646097
5124_at	YGL118C	NA	1.90968	6.96412	6.12185	2.63184e-05	0.000307487	2.44686
10108_at	YLR216C	CPR6	1.9096	10.0748	7.37623	3.45841e-06	7.4032e-05	4.53383
8982_i_at	YNL140C	RLR1	-1.90886	5.65002	-2.44884	0.0280926	0.0691937	-4.55959
9287_s_at	YMR322C	SNO4orHSP32orHSP33	1.90818	9.0944	5.89629	3.87855e-05	0.000404992	2.04845
4544_at	YHL018W	NA	1.90774	4.30568	4.68915	0.00034744	0.00196925	-0.195885
6201_at	YDR281C	PHM6	1.90667	4.21512	4.18153	0.000921397	0.0041572	-1.18624
4439_at	YHR101C	BIG1	1.90658	7.65142	5.61888	6.3094e-05	0.00056432	1.54897
3189_i_at	YHL048W	COS8	1.9063	9.43338	1.66994	0.117108	0.230926	-5.86223
4880_at	YGR135W	PRE9	1.90535	7.3945	4.81849	0.000272235	0.00164486	0.0527842
7675_at	YPR055W	SEC8	-1.90527	2.97938	-6.54206	1.3022e-05	0.000189346	3.17027
8225_at	YOR335C	ALA1	-1.90435	6.26448	-3.81125	0.00190509	0.00740421	-1.91859
6303_at	YDR157W	RPA14	1.9042	6.56727	4.28514	0.000753465	0.00356312	-0.982508
6291_at	YDR189W	SLY1	-1.9038	8.98684	-5.09092	0.000163961	0.00113544	0.570677
10152_at	YLR172C	DPH5	1.9031	8.08117	4.73918	0.00031608	0.00184068	-0.0994889
10517_at	YKR045C	NA	1.90087	5.3103	4.13325	0.0010123	0.00449135	-1.28138
4568_at	YHL040C	ARN1	-1.90027	6.02394	-5.02601	0.000184856	0.00125318	0.448049
4155_at	YIL062C	ARC15	1.89987	6.99056	5.38087	9.65935e-05	0.000770684	1.11231
9122_at	YNL272C	SEC2	-1.8998	8.07763	-2.73935	0.015965	0.0429491	-4.01872
4907_at	YGR116W	SPT6	-1.89965	2.90219	-5.85234	4.1864e-05	0.000425246	1.97001
7321_at	YBR053C	NA	1.89842	8.40715	6.0008	3.23787e-05	0.000354759	2.23392
4999_at	YGR026W	NA	1.89833	4.24955	5.70582	5.41089e-05	0.000505728	1.70661
9885_at	YLR438W	CAR2	1.89806	12.3328	8.94883	3.60388e-07	1.40176e-05	6.85458
4723_f_at	YGR294W	PAU4orPAU6orPAU1orPAU2orDAN3	1.89737	8.10496	4.86133	0.000251217	0.00155305	0.134766
6041_at	YDR434W	GPI17	-1.8967	9.83576	-3.69456	0.00239971	0.00895694	-2.15011
11320_at	YAL003W	EFB1	1.8967	9.8554	6.26825	2.05398e-05	0.000260161	2.70168
10148_at	YLR168C	NA	1.89657	7.29459	6.23827	2.16042e-05	0.000268185	2.64973
10551_at	YKR034W	DAL80	1.89588	4.78662	4.89736	0.00023484	0.0014853	0.203577
9517_g_at	YMR119W	ASI1	-1.89567	8.73621	-3.23128	0.0060271	0.0191631	-3.0665
8467_at	YOR086C	TCB1	-1.89561	3.60873	-3.67529	0.00249309	0.00924412	-2.18833
3248_s_at	NA	NA	-1.89475	3.96889	-2.7659	0.0151538	0.0410984	-3.96832
6095_at	YDR354W	TRP4	1.89474	9.79687	5.29248	0.000113367	0.000858997	0.948287
10905_at	YJR112W	NNF1	1.89438	5.41276	3.93582	0.00149036	0.00608065	-1.67166
6639_at	YDL135C	RDI1	1.89426	5.57293	6.74563	9.34161e-06	0.000147304	3.5119
7242_at	YBR106W	PHO88	1.89399	7.03592	6.02645	3.09827e-05	0.000344724	2.2792
4874_at	YGR129W	SYF2	1.89391	5.04417	4.62654	0.000391257	0.00215226	-0.316844
8728_at	YOL152W	FRE7	-1.89334	6.6244	-2.88677	0.0119414	0.0334353	-3.73716
4713_at	YGR283C	NA	1.89223	7.48968	6.31672	1.89336e-05	0.000243092	2.78539
10852_at	YJR150C	DAN1	1.89166	8.17206	3.38453	0.00444267	0.0149288	-2.76443
3424_f_at	NA	NA	-1.89157	3.90731	-2.8333	0.0132704	0.0366374	-3.83973
7402_at	YBL050W	SEC17	1.89097	6.57628	5.78902	4.67558e-05	0.00045662	1.85654
11163_at	YJL132W	NA	-1.89007	9.33024	-2.00475	0.0647066	0.140115	-5.33524
6709_i_at	YDL247W	MPH2	-1.88952	8.7574	-3.14505	0.00715494	0.0219853	-3.23565
8407_at	YOR160W	MTR10	-1.88938	3.86222	-8.32367	8.54972e-07	2.59973e-05	5.96932
3299_f_at	YGL260W	NA	1.8893	8.23051	5.00715	0.000191433	0.00128194	0.412321
5697_at	YER042W	MXR1	1.88906	6.30118	5.78798	4.68416e-05	0.00045662	1.85466
10689_at	YKL096W	CWP1	1.88885	9.49376	4.8958	0.000235527	0.00148758	0.200596
5376_at	YFL011W	HXT10	-1.88885	9.53228	-5.79217	4.64993e-05	0.000456053	1.86219
4398_at	YHR148W	IMP3	1.88676	6.26813	5.79205	4.65091e-05	0.000456053	1.86197
11065_at	YJL048C	UBX6	1.88594	8.90545	4.0248	0.00125147	0.00528319	-1.49557
4091_at	YIR010W	DSN1	-1.88555	7.41008	-3.09737	0.00786634	0.0237645	-3.32888
6118_at	YDR332W	NA	-1.88487	7.66307	-1.82457	0.089457	0.184712	-5.62616
11027_at	YJR005W	APL1	-1.88299	6.26085	-3.26642	0.0056201	0.0181598	-2.9974
6702_at	YDL206W	NA	-1.88227	6.07813	-3.03073	0.00897916	0.0265507	-3.45871
2282_s_at	NA	NA	-1.88218	3.29295	-3.30232	0.00523247	0.0171206	-2.92668
5643_at	YER070W	RNR1	-1.88099	8.00823	-2.56516	0.0224347	0.0571271	-4.34557
9653_at	YML012W	ERV25	1.88094	7.48377	3.80744	0.00191946	0.0074473	-1.92614
6462_at	YDR001C	NTH1	-1.8806	8.17244	-2.76474	0.0151881	0.0411795	-3.97051
4720_at	YGR290W	NA	-1.88031	6.5741	-6.4778	1.44785e-05	0.000201126	3.06124
4758_at	YGR238C	KEL2	-1.87779	6.14083	-1.88534	0.0802906	0.168885	-5.52984
5195_at	YGL185C	NA	1.87777	9.91999	6.21433	2.24957e-05	0.000277041	2.60817
4937_at	YGR056W	RSC1	-1.87745	6.22714	-4.22002	0.000854937	0.00391793	-1.11048
5170_at	YGL165C	NA	1.87589	7.04741	3.34122	0.00484262	0.0160305	-2.84996
4193_at	YIL118W	RHO3	1.87587	4.83409	4.46063	0.000537158	0.00271929	-0.639155
8299_at	YOR233W	KIN4	-1.87495	8.7056	-2.90067	0.0116176	0.0327646	-3.71039
10359_at	YLL027W	ISA1	1.87369	6.58761	4.70578	0.000336673	0.0019234	-0.163814
5255_s_at	YGL258W	NA	1.87255	7.34586	4.71797	0.000329001	0.00189231	-0.140323
7985_at	YPL219W	PCL8	-1.87155	4.61718	-4.2385	0.000824793	0.00381728	-1.07413
5306_at	YFR052W	RPN12	1.87135	7.88513	5.83609	4.3066e-05	0.000433213	1.94094
10716_at	YKL157W	APE2	-1.87134	8.33524	-2.4656	0.0272008	0.067317	-4.529
5135_at	YGL107C	RMD9	-1.8708	8.17027	-2.8356	0.0132104	0.0365175	-3.83533
4280_f_at	NA	NA	1.87079	8.9017	5.07436	0.000169045	0.00116117	0.539451
7821_at	YPL068C	NA	1.87071	8.06219	8.8098	4.35069e-07	1.5803e-05	6.66177
10859_at	YJR157W	NA	1.87046	5.68455	5.61238	6.3826e-05	0.000568527	1.53714
6818_at	YCR077C	PAT1	-1.86999	6.15756	-4.1908	0.000904921	0.00410468	-1.16798
4773_at	YGR253C	PUP2	1.86972	4.98356	5.83402	4.32218e-05	0.000433844	1.93724
6331_at	YDR140W	NA	1.86938	6.61582	4.09702	0.00108651	0.00473507	-1.35287
3914_s_at	NA	NA	-1.86925	7.0612	-2.42784	0.0292499	0.0716285	-4.59782
10260_at	YLR051C	NA	1.86834	5.90244	4.76439	0.000301404	0.00178189	-0.0510239
10789_f_at	YKL224C	PAU3	1.86797	8.78214	5.20412	0.000133184	0.000974828	0.78336
10951_at	YJR067C	YAE1	1.86781	4.63415	4.88737	0.00023927	0.00150197	0.1845
7210_at	YBR163W	DEM1	-1.86768	11.065	-3.85911	0.00173341	0.00685944	-1.82369
10721_at	YKL152C	GPM1	1.86672	8.5409	5.33603	0.000104754	0.000811945	1.02922
11299_at	YAR044W	SWH1	-1.86559	6.26076	-3.25283	0.00577416	0.0185612	-3.02414
4117_at	YIL009C-A	EST3	1.86551	5.73199	4.95106	0.00021246	0.00138329	0.305845
10742_at	YKL177W	NA	-1.86493	7.80002	-4.82336	0.000269758	0.00163095	0.0621103
4058_at	YIR022W	SEC11	1.86493	6.6692	5.01739	0.000187833	0.00126509	0.431721
9157_at	YNL282W	POP3	1.86491	7.87326	3.84685	0.00177582	0.00698579	-1.84798
4479_at	YHR049C-A	NA	1.86455	6.32491	4.41492	0.000586467	0.00290716	-0.72835
6242_at	YDR231C	COX20	1.86439	8.24148	4.98582	0.000199163	0.00131951	0.371869
6448_at	YDR034C	LYS14	-1.86398	7.98125	-2.82913	0.0133801	0.0368882	-3.84772
10688_at	NA	NA	1.86357	7.3655	5.53465	7.32931e-05	0.000632339	1.39528
9161_at	YNL278W	CAF120	-1.86293	8.24552	-4.07513	0.00113402	0.00489417	-1.3961
7755_at	YPR003C	NA	-1.86259	7.15955	-2.97327	0.0100628	0.0291636	-3.57021
5980_at	YDR466W	PKH3	-1.86187	10.0878	-1.99721	0.0656019	0.141856	-5.34772
7924_at	YPL190C	NAB3	-1.86164	5.76985	-8.8144	4.32352e-07	1.5803e-05	6.66819
11125_at	YJL124C	LSM1	1.86144	6.33728	6.51316	1.3657e-05	0.000195234	3.12131
6206_at	YDR286C	NA	1.86142	5.8397	6.19506	2.32413e-05	0.000281877	2.57465
11319_at	YAL003W	EFB1	1.86122	9.12025	6.36196	1.75531e-05	0.000229778	2.86322
8253_at	YOR277C	NA	1.86094	6.53393	5.88346	3.96591e-05	0.000411109	2.02558
7347_at	YBR033W	NA	-1.85817	7.41434	-1.80621	0.0924042	0.189696	-5.65487
8302_at	YOR236W	DFR1	1.85791	5.92014	5.441	8.66771e-05	0.000714779	1.22332
10158_at	YLR178C	TFS1	1.85761	8.99731	3.65293	0.0026061	0.00954412	-2.2327
5422_s_at	YFL067W	NA	-1.85613	9.96792	-6.75588	9.18805e-06	0.000146287	3.52894
4499_at	YHR025W	THR1	1.85545	9.47105	4.37812	0.000629541	0.00308492	-0.800289
4095_at	YIR014W	NA	1.85334	7.59825	3.22475	0.006106	0.0193415	-3.07934
7707_i_at	YPR043W	RPL43A	1.85324	7.74343	4.95864	0.000209486	0.00137328	0.320248
11199_at	YJL181W	NA	-1.85081	11.0713	-3.9172	0.00154597	0.00625289	-1.70855
8517_at	YOR044W	NA	1.85024	6.98315	5.15984	0.000144438	0.00103444	0.700351
8116_f_at	NA	NA	-1.85023	5.01737	-2.18995	0.0459411	0.104855	-5.02081
10236_at	YLR117C	CLF1	-1.85007	6.29304	-2.2374	0.0420241	0.0973437	-4.93802
8256_at	YOR280C	FSH3	1.84853	6.4029	4.84667	0.000258213	0.0015858	0.106737
6499_at	YDL008W	APC11	1.8472	6.54909	5.09752	0.000161977	0.00112588	0.583122
9285_at	YMR320W	NA	1.84607	6.79608	5.39593	9.4004e-05	0.000756489	1.14015
5605_at	YER120W	SCS2	1.84602	5.70525	4.40505	0.000597711	0.00295688	-0.74763
7659_at	YPR083W	MDM36	-1.8458	7.55745	-3.24522	0.00586224	0.0187411	-3.0391
10748_at	YKL171W	NA	-1.84452	6.57286	-3.6382	0.00268334	0.00980005	-2.26192
6672_s_at	YDL191W	RPL35AorRPL35B	1.84419	7.65958	6.14601	2.52582e-05	0.0002996	2.48911
9689_at	YML065W	ORC1	-1.84392	5.99424	-2.69345	0.0174683	0.0462731	-4.10551
8868_at	YNL027W	CRZ1	-1.84202	6.49871	-3.99187	0.00133497	0.00557331	-1.56071
5222_at	YGL203C	KEX1	-1.84185	8.03342	-3.27909	0.00548008	0.0177998	-2.97244
5238_at	YGL231C	NA	1.8413	4.95382	4.13247	0.00101384	0.00449606	-1.28292
9006_s_at	YNL162W	RPL42AorRPL42B	1.84108	7.11853	4.63783	0.000382958	0.00211658	-0.295015
7700_at	YPR037C	ERV2	1.84079	6.53446	5.16268	0.000143687	0.00103179	0.705684
9034_at	YNL179C	NA	1.84032	6.44545	3.38508	0.00443774	0.0149176	-2.76333
9726_at	YML073C	RPL6AorRPL6B	1.8395	5.78298	5.88391	3.96283e-05	0.000411109	2.02637
4985_at	YGR012W	NA	-1.83894	7.31787	-5.03043	0.000183349	0.00124477	0.456417
4106_at	YIL019W	FAF1	1.8388	7.08998	3.79132	0.00198158	0.00766283	-1.95812
6101_at	YDR360W	NA	-1.83876	8.6232	-5.91006	3.78709e-05	0.000397665	2.07296
6428_at	YDR059C	UBC5	1.83798	5.89331	6.0593	2.92858e-05	0.000330572	2.33707
6184_at	YDR307W	NA	-1.83732	10.4308	-3.88111	0.00165985	0.00663299	-1.78007
10889_at	YJR141W	NA	1.83667	5.39347	3.01053	0.00934622	0.0274621	-3.49795
10750_at	YKL169C	NA	1.83667	7.96197	7.173	4.7365e-06	8.93237e-05	4.21044
5345_at	YFR003C	YPI1	1.83561	6.50809	4.5134	0.000485484	0.00252288	-0.536365
8814_at	YNR055C	HOL1	-1.83508	6.79961	-3.94265	0.00147049	0.00602064	-1.65815
2505_s_at	NA	NA	-1.83401	4.02125	-1.81634	0.0907672	0.186962	-5.63905
11330_at	YAR015W	ADE1	1.83137	9.1845	6.13717	2.56411e-05	0.000302987	2.47365
7225_at	YBR134W	NA	1.83124	6.46966	4.51264	0.000486194	0.00252318	-0.537849
8720_f_at	NA	NA	1.83115	8.1736	5.79887	4.59579e-05	0.000452549	1.87421
7798_at	YPL045W	VPS16	-1.83067	11.1378	-3.64286	0.00265868	0.00972143	-2.25269
5007_at	YGL010W	NA	1.82922	5.47577	4.84763	0.000257748	0.00158475	0.108575
5914_at	YDR535C	NA	1.82877	8.43816	5.59428	6.59102e-05	0.000583073	1.50417
4418_at	YHR124W	NDT80	-1.82676	6.87716	-2.06436	0.0580086	0.127745	-5.23561
10195_at	YLR122C	NA	1.82658	6.2384	5.22133	0.000129059	0.000952383	0.815562
9637_at	YMR015C	ERG5	-1.82557	5.97765	-4.04492	0.00120309	0.00512825	-1.45579
10770_at	YKL192C	ACP1	1.82401	6.43889	5.21328	0.000130972	0.000963451	0.800505
8176_at	YOR377W	ATF1	-1.82377	7.82689	-3.69553	0.00239507	0.00894678	-2.14817
5261_at	YGL252C	RTG2	-1.82374	8.79452	-3.91463	0.00155382	0.00626833	-1.71365
8624_at	YOL073C	NA	1.8224	9.76454	5.3225	0.000107355	0.000826862	1.0041
7814_at	YPL076W	GPI2	1.82122	9.77189	5.38026	9.67003e-05	0.000770877	1.11118
3774_f_at	NA	NA	-1.82119	4.68961	-7.09217	5.3757e-06	9.89787e-05	4.08025
9967_at	YLR343W	GAS2	-1.82061	7.70667	-3.94998	0.00144944	0.00595532	-1.64362
6369_at	YDR090C	NA	1.82013	6.43328	3.97919	0.0013686	0.00569054	-1.58579
6403_at	YDR079W	PET100	1.81981	6.78736	5.76808	4.85028e-05	0.000466296	1.81888
7169_at	YBR213W	MET8	1.81981	9.25705	4.68961	0.000347133	0.0019687	-0.194986
6631_at	YDL144C	NA	1.81965	9.65249	5.11038	0.000158185	0.0011086	0.607349
10771_at	YKL191W	DPH2	1.81909	11.5199	8.87455	3.98432e-07	1.49974e-05	6.75185
11160_at	YJL135W	LCB3	1.81899	4.08629	3.0342	0.00891756	0.0263989	-3.45196
7801_at	YPL042C	SSN3	1.81844	9.23339	5.37217	9.81243e-05	0.000776263	1.0962
10798_at	YKL214C	YRA2	1.81815	8.39928	5.21696	0.000130094	0.000958507	0.807385
7554_at	YPR201W	ARR3	-1.81709	3.06937	-6.88079	7.51597e-06	0.00012619	3.73555
11287_f_at	YAR020C	PAU5orPAU7	1.81662	7.44905	5.73745	5.11802e-05	0.000484551	1.76372
10178_at	YLR148W	PEP3	-1.81654	3.35867	-5.62636	6.22628e-05	0.000559406	1.56258
7743_at	YPL010W	RET3	1.81615	7.08788	5.69448	5.52008e-05	0.000513246	1.68611
8843_at	YNR040W	NA	1.81403	5.30984	4.73326	0.000319634	0.00185674	-0.110887
3018_s_at	NA	NA	-1.8138	5.05864	-6.26024	2.08187e-05	0.000262483	2.68781
6911_at	YCL016C	DCC1	1.81364	8.92122	3.98584	0.00135086	0.00562958	-1.57264
9452_at	YMR182C	RGM1	1.81144	6.61073	6.70106	1.00414e-05	0.000154887	3.4376
9987_at	YLR318W	EST2	-1.81124	3.91533	-1.64939	0.121297	0.237979	-5.89258
6873_at	YCL006C	NA	1.81028	5.15415	5.34661	0.000102766	0.000803451	1.04885
8783_at	YNR071C	NA	1.80896	8.5834	7.285	3.98011e-06	8.07703e-05	4.38936
9853_at	YLR449W	FPR4	1.80892	8.67068	6.25228	2.10998e-05	0.000264661	2.67402
10543_at	YKR026C	GCN3	1.80885	6.56501	5.42828	8.86836e-05	0.000726832	1.19986
6535_at	YDL063C	NA	-1.80873	7.33402	-2.88782	0.0119166	0.0333859	-3.73513
7927_at	YPL187W	MF(ALPHA)1	-1.80872	7.09132	-5.07988	0.000167333	0.00115196	0.549857
8974_at	YNL103W	MET4	-1.80866	5.34949	-5.40777	9.20195e-05	0.000745757	1.16202
4556_at	YHL006C	SHU1	1.8086	4.90155	4.75276	0.000308086	0.00180766	-0.073377
7201_at	YBR155W	CNS1	1.8085	10.1846	5.5678	6.90882e-05	0.000605008	1.45587
5225_at	YGL200C	EMP24	1.80807	6.91318	3.50226	0.003515	0.0122847	-2.53146
10349_at	YLR007W	NSE1	1.80797	8.89134	4.70218	0.000338972	0.00193299	-0.170747
4788_at	YGR222W	PET54	1.8079	7.80229	3.80984	0.00191041	0.00741526	-1.92139
2580_at	NA	NA	-1.80755	4.91864	-5.12602	0.000153696	0.00108529	0.636798
10296_at	YLR044C	PDC1	-1.80743	7.73346	-3.81417	0.00189414	0.00738032	-1.9128
9884_at	YLR437C	NA	1.80571	5.49183	4.57257	0.000433603	0.00232358	-0.421426
3225_f_at	NA	NA	-1.80553	3.53326	-3.59846	0.00290352	0.0104368	-2.34076
10790_at	YKL222C	NA	-1.80319	8.3625	-3.39785	0.00432639	0.0145959	-2.73809
11177_at	YJL161W	NA	1.80274	3.35516	6.41082	1.61802e-05	0.000217954	2.94697
6863_at	YCR028C-A	RIM1	1.80223	5.06835	3.83536	0.00181655	0.00712335	-1.87078
7975_at	YPL229W	NA	1.80211	5.15551	4.91856	0.000225727	0.00144995	0.243989
8286_at	YOR265W	RBL2	1.80131	5.90027	4.48137	0.000516199	0.00262966	-0.598717
4532_at	YHR013C	ARD1	1.80102	8.28263	4.64891	0.000374984	0.00208362	-0.273591
7484_at	YBL102W	SFT2	1.8008	5.52896	4.10041	0.00107934	0.00471046	-1.34619
10496_at	YKR071C	DRE2	1.80076	5.84019	4.519	0.000480317	0.0025007	-0.525486
9354_at	YMR260C	TIF11	1.80057	4.12144	3.84862	0.00176964	0.00697801	-1.84448
3050_at	NA	NA	-1.79993	5.05507	-2.17165	0.0475402	0.107978	-5.0525
5782_at	YEL053C	MAK10	-1.7975	5.41794	-3.53664	0.00328282	0.0116036	-2.46333
11310_at	YAL011W	SWC3	-1.79734	6.10841	-3.66108	0.00256432	0.00943179	-2.21653
5371_at	YFL015C	NA	1.79715	6.92356	4.91131	0.000228803	0.00145796	0.230167
6930_at	YCL045C	NA	-1.79699	6.91925	-3.62443	0.00275769	0.0100088	-2.28925
6909_at	YCL018W	LEU2	1.79673	10.5183	7.46716	3.00963e-06	6.81914e-05	4.67673
5642_at	YER069W	ARG5,6	-1.79625	9.81834	-3.93883	0.00148158	0.0060487	-1.66571
4579_at	YHL029C	NA	-1.79596	10.4472	-3.26762	0.00560659	0.0181287	-2.99502
8363_at	YOR206W	NOC2	-1.79584	6.36058	-2.70591	0.0170471	0.0453116	-4.08199
10417_at	YLL059C	NA	1.79484	5.97585	5.76827	4.84863e-05	0.000466296	1.81923
11202_at	YJL178C	ATG27	1.79455	4.35608	4.88323	0.000241126	0.00150764	0.176614
9208_at	YNL322C	KRE1	1.79363	9.64329	3.96998	0.00139358	0.00576897	-1.60402
9685_at	YML025C	YML6	1.79329	7.51649	6.56378	1.25652e-05	0.00018385	3.207
5362_at	YFR020W	NA	1.7927	7.11928	3.40413	0.00427268	0.0144513	-2.72568
3728_f_at	NA	NA	-1.7921	6.52963	-5.98353	3.3356e-05	0.00036249	2.20336
5023_at	YGR006W	PRP18	1.79209	5.57024	3.74514	0.00217103	0.00826546	-2.04973
4966_at	YGR040W	KSS1	1.79124	3.93743	4.24824	0.00080935	0.00376072	-1.05499
10192_at	YLR119W	SRN2	1.78995	6.67329	4.89364	0.000236479	0.00148856	0.196475
5567_at	YER127W	LCP5	1.78983	7.04589	5.52856	7.40936e-05	0.000637478	1.38414
6474_at	YDR013W	PSF1	1.7898	5.87471	4.9605	0.000208761	0.00136949	0.323787
6626_at	YDL149W	ATG9	-1.78971	3.32143	-3.78077	0.00202332	0.00779197	-1.97904
9449_at	YMR179W	SPT21	-1.78967	4.731	-2.51128	0.0249045	0.0625627	-4.44518
10248_at	YLR084C	RAX2	-1.78967	6.19295	-2.6065	0.0207014	0.0533687	-4.26865
5990_at	YDR476C	NA	1.78764	6.88073	2.4848	0.0262117	0.0652322	-4.49383
8804_at	YNR046W	TRM112	1.7865	6.99921	3.91684	0.00154705	0.00625292	-1.70925
3717_s_at	NA	NA	-1.78647	3.50283	-4.19974	0.000889328	0.00404685	-1.15039
11057_at	YJL055W	NA	1.78607	7.23337	4.64601	0.000377054	0.00209138	-0.279196
9902_at	YLR411W	CTR3	1.78576	6.38929	6.03139	3.07212e-05	0.000342631	2.2879
6005_at	YDR444W	NA	-1.78531	10.1774	-2.96154	0.0102994	0.0297755	-3.59292
6534_at	YDL064W	UBC9	1.78443	5.43216	5.30829	0.000110158	0.000842448	0.977696
10954_at	YJR070C	LIA1	1.78424	9.5142	4.59882	0.000412445	0.00223717	-0.370522
9202_at	YNL328C	MDJ2	1.78243	6.79469	4.43164	0.000567909	0.00284106	-0.695699
10648_at	YKL091C	NA	1.77878	9.97919	5.74157	5.08119e-05	0.000482042	1.77114
11380_at	YAL066W	NA	1.77876	5.04666	3.65625	0.00258898	0.00950006	-2.22611
6940_s_at	NA	NA	-1.77796	4.64972	-3.34351	0.00482058	0.0159915	-2.84544
8166_at	YOR367W	SCP1	1.77728	4.60341	3.40542	0.00426174	0.0144247	-2.72314
5002_at	YGL015C	NA	1.77724	6.25789	5.32041	0.000107762	0.000828628	1.00022
10512_at	YKR040C	NA	1.77698	6.79844	6.3877	1.68151e-05	0.000224562	2.90739
4506_at	YHR032W	NA	1.77646	7.26202	2.03865	0.0608151	0.132953	-5.27877
6537_f_at	YDL061C	RPS29AorRPS29B	1.7756	4.87433	6.78878	8.71272e-06	0.000140959	3.58358
10177_at	YLR147C	SMD3	1.77545	5.87361	4.95118	0.000212413	0.00138329	0.306074
10886_at	YJR138W	IML1	-1.77491	3.3827	-5.99567	3.26661e-05	0.000356991	2.22483
6599_at	YDL130W	RPP1B	1.77474	6.00117	4.5504	0.000452342	0.00239377	-0.464464
7682_at	YPR062W	FCY1	1.77394	8.22647	4.00165	0.00130959	0.00548753	-1.54136
4490_at	YHR062C	RPP1	1.77365	6.09239	3.32896	0.00496221	0.0163741	-2.87414
4073_at	YIR037W	HYR1	1.77362	6.96295	5.71572	5.31738e-05	0.000498371	1.7245
4811_at	YGR201C	NA	1.77353	10.3565	4.72147	0.00032683	0.00188331	-0.133578
9206_at	YNL324W	NA	-1.77322	7.46169	-2.69537	0.0174028	0.046139	-4.10189
6109_at	YDR367W	NA	1.77272	6.17108	4.37931	0.000628103	0.00307949	-0.797969
5099_at	YGL098W	USE1	1.77257	4.78821	3.57103	0.00306608	0.0109369	-2.39517
5979_at	YDR510W	SMT3	1.77236	3.56659	4.95178	0.000212177	0.00138329	0.30721
5434_at	YFL046W	NA	1.77177	4.62947	4.94631	0.000214346	0.00139196	0.296818
5368_at	YFL017W-A	SMX2	1.77152	6.48676	3.3431	0.00482448	0.015994	-2.84624
9024_at	YNL144C	NA	-1.77141	5.34685	-4.62479	0.00039256	0.00215688	-0.320228
4997_at	YGR024C	THG1	1.77031	6.6997	3.92604	0.0015193	0.00616988	-1.69103
8254_at	YOR278W	HEM4	1.76995	6.9096	5.72742	5.2091e-05	0.000490686	1.74562
8584_at	YOL023W	IFM1	-1.7698	8.06362	-3.2873	0.0053913	0.0175725	-2.95628
8631_at	YOL066C	RIB2	1.76979	10.7208	7.33265	3.69798e-06	7.74006e-05	4.46496
11143_at	YJL104W	PAM16	1.76888	5.39541	4.53944	0.000461906	0.00243198	-0.485744
10629_at	YKL067W	YNK1	1.76876	7.51202	5.46784	8.25996e-05	0.000687839	1.27271
9762_at	YML123C	PHO84	-1.76774	8.24381	-3.66657	0.00253659	0.00935668	-2.20565
9371_at	YMR232W	FUS2	-1.76638	10.1632	-3.45169	0.0038869	0.0133447	-2.6316
5411_at	YFL019C	NA	1.76531	4.30155	4.63395	0.000385789	0.00212836	-0.302514
9376_at	YMR237W	NA	-1.76515	8.48856	-1.86745	0.0828974	0.173353	-5.55839
6031_at	YDR425W	SNX41	-1.76495	6.11572	-4.12077	0.00103727	0.0045869	-1.30602
4170_at	YIL096C	NA	1.76362	5.49892	4.35577	0.000657285	0.00319571	-0.844045
4884_i_at	YGR138C	NA	-1.7634	8.06846	-3.62279	0.00276667	0.0100338	-2.29251
8409_at	YOR162C	YRR1	-1.76316	7.20386	-1.69161	0.112829	0.224288	-5.82996
9330_at	YMR281W	GPI12	1.76271	7.49646	5.69237	5.54063e-05	0.000513622	1.68229
9907_at	YLR416C	NA	1.76245	7.78058	5.53398	7.3381e-05	0.000632513	1.39405
10259_at	YLR095C	IOC2	-1.76239	8.98295	-3.23743	0.00595388	0.0189626	-3.05442
6012_at	YDR453C	TSA2	1.76205	5.26302	3.4745	0.00371449	0.0128568	-2.58644
5505_at	NA	NA	-1.76192	9.19923	-3.42361	0.00411022	0.0139993	-2.68716
11080_at	YJL077C	ICS3	1.76149	8.15827	4.83469	0.000264078	0.00161019	0.0838191
3907_f_at	YAL068C	PAU4orPAU6orPAU1orPAU2orDAN3	1.7607	8.83401	4.04418	0.00120484	0.00513027	-1.45725
6611_at	YDL120W	YFH1	1.76051	6.50489	5.00881	0.000190844	0.00127984	0.415467
6046_at	YDR439W	LRS4	1.7603	6.00142	6.27042	2.04648e-05	0.000259564	2.70543
6654_at	YDL166C	FAP7	1.75906	7.22825	4.0417	0.00121071	0.00514661	-1.46216
5667_at	YER055C	HIS1	1.7566	8.46266	4.08686	0.00110831	0.00480991	-1.37295
9950_at	YLR369W	SSQ1	-1.75572	8.1543	-4.36934	0.000640298	0.00312451	-0.817481
9382_at	YMR243C	ZRC1	1.75552	9.98986	8.13982	1.11174e-06	3.22575e-05	5.69983
9151_at	YNL288W	CAF40	1.75532	9.63098	5.40018	9.32862e-05	0.000752579	1.14801
7638_at	YPR107C	YTH1	1.75509	6.79203	4.9133	0.000227954	0.00145521	0.233963
5189_at	YGL190C	CDC55	-1.75382	5.40594	-4.71001	0.000333989	0.0019151	-0.155657
3024_g_at	NA	NA	1.75255	4.25724	4.71065	0.000333583	0.0019151	-0.154419
6614_at	YDL117W	CYK3	-1.75233	8.18304	-2.34871	0.0340322	0.0816056	-4.74065
11187_at	YJL151C	SNA3	1.75118	4.54262	5.16652	0.00014268	0.00102692	0.712883
10800_at	YKL212W	SAC1	-1.75104	8.44868	-3.04324	0.00875907	0.0259987	-3.43439
9113_at	YNL235C	NA	1.7502	6.21786	5.30016	0.000111795	0.00085122	0.962589
11216_at	YJL210W	PEX2	1.74988	5.70698	4.23486	0.000830636	0.00383671	-1.08128
9456_at	YMR186W	HSC82orHSP82	-1.74947	8.06751	-3.69626	0.00239165	0.0089385	-2.14674
7874_at	YPL106C	SSE1	-1.74922	6.42959	-1.97388	0.0684471	0.146953	-5.3862
10719_at	YKL154W	SRP102	1.74906	4.83433	5.31735	0.000108362	0.000831193	0.994531
10640_at	YKL056C	NA	1.74896	5.87346	5.13337	0.000151634	0.00107479	0.650613
7123_at	YBR258C	SHG1	1.74867	5.611	4.08385	0.00111486	0.00482933	-1.37889
6936_g_at	YCL042W	GLK1	1.74858	10.304	2.11142	0.0531786	0.118676	-5.15588
6287_at	YDR185C	NA	1.74824	8.07779	4.82959	0.000266621	0.00161691	0.074043
11169_at	YJL126W	NIT2	1.74748	8.57694	4.48122	0.000516353	0.00262966	-0.599021
4076_f_at	YIR041W	PAU3	1.7473	8.33741	5.44732	8.5699e-05	0.000707964	1.23495
5634_at	YER063W	THO1	1.74697	6.06582	4.46813	0.000529477	0.00268991	-0.624523
9496_at	YMR142C	RPL13BorRPL13A	1.74565	7.76381	3.96837	0.001398	0.00578474	-1.60722
10936_at	YJR097W	JJJ3	1.7447	4.36675	7.04874	5.75613e-06	0.000103334	4.00993
6645_at	YDL175C	AIR2	1.74354	6.15158	3.88975	0.00163184	0.00654347	-1.76295
10749_at	YKL170W	MRPL38	1.74352	6.94785	5.73505	5.13972e-05	0.00048562	1.75938
5972_at	YDR503C	LPP1	1.74244	4.86434	5.6557	5.91124e-05	0.000537831	1.61585
9530_at	YMR088C	VBA1	-1.74162	7.57219	-3.73093	0.00223294	0.00845414	-2.07793
4958_at	YGR031W	NA	1.74111	10.1841	6.02569	3.10229e-05	0.000344761	2.27786
5433_at	YFL047W	RGD2	-1.74082	8.76442	-2.80781	0.0139542	0.0382035	-3.88846
4158_at	YIL059C	NA	1.7399	6.80148	4.18498	0.000915225	0.00413849	-1.17944
8370_at	YOR168W	GLN4	-1.739	6.62503	-3.55777	0.00314789	0.0111775	-2.42145
3787_f_at	NA	NA	-1.73733	5.05499	-3.10855	0.00769343	0.0233169	-3.30704
9045_at	YNL168C	NA	1.73647	7.71196	4.563	0.00044159	0.00235288	-0.439994
6641_at	YDL179W	PCL9	1.73638	8.86723	5.54757	7.16239e-05	0.000622541	1.4189
10223_at	YLR104W	NA	1.73546	4.96315	5.67596	5.70342e-05	0.000523866	1.65257
4959_at	YGR032W	GSC2	-1.73429	4.98598	-4.1785	0.000926847	0.00417475	-1.1922
9055_at	YNL204C	SPS18	1.73381	4.5508	4.28121	0.000759217	0.00358562	-0.990215
6608_at	YDL123W	SNA4	1.73377	4.57069	4.70025	0.000340215	0.00193771	-0.174477
10883_at	YJR135C	MCM22	1.73324	5.49317	6.79716	8.59586e-06	0.000139552	3.59747
5057_at	YGL050W	NA	1.73271	8.79037	4.52311	0.000476554	0.00248805	-0.517489
4074_at	YIR038C	GTT1	1.73254	6.14635	4.00506	0.00130086	0.00545775	-1.53461
9469_at	YMR158W	MRPS8	1.73216	5.16574	3.2129	0.00625163	0.0196959	-3.10261
4954_at	YGR073C	NA	1.73157	8.08893	5.93018	3.65741e-05	0.000386658	2.10875
7205_at	YBR159W	NA	1.73021	7.89938	3.00669	0.00941784	0.027629	-3.50542
10056_at	YLR254C	NDL1	1.72975	6.96694	3.99268	0.00133283	0.00556687	-1.55909
11162_at	YJL133W	MRS3	1.72947	5.99034	4.51903	0.000480291	0.0025007	-0.525432
4904_at	YGR114C	NA	1.72934	6.2417	5.10742	0.000159049	0.00111215	0.601778
10499_at	YKR074W	NA	1.72893	6.52788	5.72289	5.25073e-05	0.000493624	1.73745
6798_f_at	YCR104W	PAU3	1.72776	8.07321	4.92238	0.000224126	0.00144268	0.251257
11141_at	YJL106W	IME2	-1.72758	5.70744	-2.59467	0.021184	0.0544023	-4.29071
10503_at	YKR078W	NA	-1.72685	7.88363	-3.95829	0.00142596	0.00586661	-1.62717
10518_at	YKR046C	PET10	1.72573	6.61039	4.65439	0.000371104	0.00206951	-0.263
[truncated: 7,336 more rows]
