# Supplementary material for: Covert Genetic Selections to Optimize Phenotypes
Source: PLoS One. 2007 Nov 21;2(11):e1200. doi: 10.1371/journal.pone.0001200 (PMC2075469; doi:10.1371/journal.pone.0001200)
Supplement: Table S6 — gal37 vs gal30 (1.82 MB XLS) [file pone.0001200.s011.xls]

## Sheet: gal37VSgal30_allID
ID	YN	Gene	logFC	AveExpr	t	P.Value	adj.P.Val	B
6856_at	YCR023C	NA	7.1413	9.67943	22.9022	1.67147e-12	2.60052e-09	18.8507
5677_at	YER061C	CEM1	7.08267	8.3998	15.4934	3.27201e-10	5.26624e-08	13.8883
4131_at	YIL040W	APQ12	6.841	5.1372	18.6389	2.74794e-11	1.2826e-08	16.2715
7860_at	YPL120W	VPS30	6.80012	10.0631	26.6757	2.0629e-13	6.31805e-10	20.6749
6327_at	YDR137W	RGP1	6.77373	9.66338	12.1059	8.27098e-09	6.17677e-07	10.6804
4356_at	YHR151C	NA	6.75918	9.21657	19.641	1.35318e-11	9.02281e-09	16.937
9963_at	YLR382C	NAM2	6.7004	7.64323	10.8048	3.52037e-08	1.8359e-06	9.21587
4845_at	YGR145W	ENP2	6.51785	8.42885	15.0424	4.84215e-10	7.17484e-08	13.5043
5297_at	YGL263W	COS12	6.48082	9.05523	35.5769	3.85831e-15	3.60174e-11	23.8266
7286_at	YBR063C	NA	6.44148	8.02271	15.8633	2.3905e-10	4.64903e-08	14.1946
8391_at	YOR144C	ELG1	6.41793	8.78918	10.4243	5.52253e-08	2.64373e-06	8.75814
4446_at	YHR065C	RRP3	6.38293	7.98174	18.9162	2.25099e-11	1.2826e-08	16.4597
4427_at	YHR091C	MSR1	6.33004	10.269	17.6887	5.5625e-11	1.73086e-08	15.6014
7207_at	YBR161W	CSH1	6.31695	10.1248	14.9474	5.26556e-10	7.56216e-08	13.4219
9967_at	YLR343W	GAS2	6.29049	7.70667	14.5901	7.25029e-10	9.27143e-08	13.1071
5993_at	YDR479C	PEX29	6.26656	8.78096	18.4511	3.15048e-11	1.3368e-08	16.1422
8907_s_at	NA	NA	6.24086	7.48885	15.1437	4.42987e-10	6.77916e-08	13.5916
10194_at	YLR121C	YPS3	6.16921	9.98126	20.6748	6.74461e-12	5.24675e-09	17.583
7170_at	YBR168W	PEX32	6.16869	8.37754	33.4141	9.20246e-15	4.29525e-11	23.1785
11182_at	YJL156C	SSY5	6.15931	10.6132	12.5121	5.40352e-09	4.31127e-07	11.1082
7216_at	YBR125C	PTC4	-6.15636	7.80639	-21.5526	3.82939e-12	4.46841e-09	18.1018
4354_at	YHR194W	MDM31	6.12076	10.0963	14.3274	9.21296e-10	1.12659e-07	12.8706
7876_at	YPL104W	MSD1	6.07417	8.03546	11.4096	1.76561e-08	1.07725e-06	9.91523
10086_at	YLR238W	FAR10	5.95067	8.53105	17.8294	4.99993e-11	1.60946e-08	15.7032
4731_at	YGR255C	COQ6	5.94657	7.89417	15.5565	3.09991e-10	5.16744e-08	13.9411
7628_at	YPR140W	TAZ1	5.93933	8.39116	24.8127	5.57843e-13	1.04149e-09	19.82
4941_at	YGR060W	ERG25	5.93664	9.09007	15.5989	2.98985e-10	5.16744e-08	13.9764
9880_at	YLR433C	CNA1	5.88376	9.41076	12.8751	3.73006e-09	3.25422e-07	11.4796
7273_at	YBR092C	PHO3	5.87543	7.2321	16.8783	1.04393e-10	2.43628e-08	14.9973
7852_at	YPL083C	SEN54	5.87288	8.1713	17.0876	8.8495e-11	2.19741e-08	15.1564
10337_at	YLL006W	MMM1	5.86854	9.5002	11.4833	1.62649e-08	1.01901e-06	9.99822
2616_at	NA	NA	5.86658	6.0777	13.7135	1.63782e-09	1.73739e-07	12.3004
10957_at	YJR073C	OPI3	5.86293	7.48334	21.2139	4.75158e-12	4.47323e-09	17.9048
6145_at	YDR314C	NA	5.84856	7.91173	11.8214	1.1225e-08	7.81978e-07	10.3727
6832_at	YCR044C	PER1	5.84228	8.1691	14.7783	6.12104e-10	8.40292e-08	13.2739
6930_at	YCL045C	NA	5.82466	6.91925	12.5591	5.14744e-09	4.24446e-07	11.157
2148_at	NA	NA	5.82428	6.28048	13.162	2.80004e-09	2.61384e-07	11.7663
7112_at	YBR247C	ENP1	5.77753	10.5991	12.2464	7.12921e-09	5.54593e-07	10.8299
6931_at	YCL046W	NA	5.74995	8.21276	10.4652	5.25813e-08	2.54325e-06	8.80807
4708_at	YGR278W	CWC22	-5.74189	7.30181	-11.1329	2.41203e-08	1.40727e-06	9.5994
2615_s_at	NA	NA	5.7215	6.64914	9.29289	2.2817e-07	7.97739e-06	7.30997
10035_at	YLR277C	YSH1	5.72026	7.83378	12.1799	7.64735e-09	5.75709e-07	10.7593
11120_at	YJL082W	IML2	5.70195	8.48372	11.8324	1.10921e-08	7.78535e-07	10.3847
10671_at	YKL113C	RAD27	5.65542	9.89627	26.1537	2.70725e-13	6.31805e-10	20.4437
6532_at	YDL066W	IDP1	5.65335	7.90091	21.2008	4.7919e-12	4.47323e-09	17.897
7038_s_at	YBR201W	DER1	5.6411	6.71434	15.745	2.641e-10	4.83406e-08	14.0975
5948_at	YDR524C	AGE1	5.60608	8.46477	9.62164	1.4914e-07	5.84968e-06	7.74487
4788_at	YGR222W	PET54	5.60192	7.80229	12.6202	4.83426e-09	4.06557e-07	11.2199
10624_at	YKL072W	STB6	5.57817	7.65288	9.36553	2.0751e-07	7.45041e-06	7.4071
9004_at	YNL118C	DCP2	5.56823	6.76944	8.12122	1.14193e-06	2.79056e-05	5.65784
5147_at	YGL142C	GPI10	5.55837	7.90452	10.1105	8.08406e-08	3.64564e-06	8.37
4782_at	YGR216C	GPI1	5.51399	6.67403	13.1763	2.7609e-09	2.61384e-07	11.7803
6891_at	YCR014C	POL4	5.49882	9.18736	8.86502	4.03614e-07	1.25591e-05	6.72562
10224_at	YLR105C	SEN2	5.44863	8.2724	18.6493	2.72749e-11	1.2826e-08	16.2785
9983_at	YLR359W	ADE13	5.44759	8.26811	13.1317	2.88561e-09	2.66705e-07	11.7362
6246_at	YDR235W	PRP42	5.43203	7.92997	14.8164	5.91621e-10	8.24296e-08	13.3074
9666_at	YML046W	PRP39	5.42786	7.10615	12.9411	3.48999e-09	3.10277e-07	11.5462
10990_at	YJR013W	GPI14	5.42259	8.39427	20.4317	7.92085e-12	5.68778e-09	17.4346
6062_at	YDR411C	DFM1	5.38898	8.79078	13.6767	1.69649e-09	1.77941e-07	12.2654
8826_at	YNR023W	SNF12	-5.38752	8.00405	-10.8847	3.2081e-08	1.70157e-06	9.31016
8671_at	YOL117W	RRI2	5.34753	7.97319	7.92437	1.5202e-06	3.53011e-05	5.36368
7948_at	YPL210C	SRP72	5.33943	7.95071	7.13526	5.02438e-06	9.31261e-05	4.13348
9048_at	YNL165W	NA	5.3351	7.91235	8.18471	1.04231e-06	2.60433e-05	5.75165
2785_s_at	NA	NA	5.33109	6.20629	9.57004	1.59318e-07	6.17111e-06	7.67739
6136_at	YDR350C	TCM10	5.30807	8.91539	11.5167	1.56735e-08	1.00214e-06	10.0357
4652_at	NA	NA	5.29287	7.9287	12.3127	6.64944e-09	5.21618e-07	10.8999
10062_at	YLR260W	LCB5	5.25706	8.9531	10.0466	8.74616e-08	3.86945e-06	8.28973
10718_at	YKL155C	RSM22	5.25705	7.03889	13.1703	2.77732e-09	2.61384e-07	11.7744
11262_s_at	NA	NA	5.23841	7.87989	17.0739	8.94501e-11	2.19741e-08	15.1461
9443_at	YMR173W-A	NA	5.23503	10.7138	10.4168	5.57242e-08	2.65401e-06	8.74899
6462_at	YDR001C	NTH1	5.22814	8.17244	8.21679	9.955e-07	2.5487e-05	5.79887
7849_at	YPL086C	ELP3	5.21506	6.47662	13.5067	1.99825e-09	2.02758e-07	12.1026
4197_at	YIL114C	POR2	5.19687	7.27101	17.901	4.73735e-11	1.60946e-08	15.7546
9337_at	YMR288W	HSH155	5.19532	7.64271	8.21415	9.99278e-07	2.5487e-05	5.79498
9458_at	YMR187C	NA	5.19434	8.42218	22.6409	1.95527e-12	2.60749e-09	18.7101
11212_at	YJL171C	NA	5.16553	8.89722	16.2049	1.79937e-10	3.73269e-08	14.4708
7085_at	YBR265W	TSC10	5.16294	9.11155	12.9543	3.4441e-09	3.09141e-07	11.5594
3247_s_at	NA	NA	5.15088	8.44432	11.4223	1.74083e-08	1.06912e-06	9.92953
5145_at	YGL144C	ROG1	5.14435	8.72949	7.10494	5.26897e-06	9.73976e-05	4.08454
11189_at	YJL149W	NA	5.11644	7.27347	14.2021	1.03424e-09	1.19193e-07	12.7563
9544_at	YMR102C	NA	5.10606	8.089	7.4768	2.96577e-06	6.10595e-05	4.67613
10743_at	YKL176C	LST4	5.08908	7.07202	7.65663	2.26055e-06	4.94197e-05	4.95555
7275_at	YBR094W	NA	5.08426	7.40873	11.6573	1.3424e-08	8.95094e-07	10.1922
7943_at	YPL172C	COX10	5.07749	9.71667	15.7807	2.56259e-10	4.78435e-08	14.1268
10351_at	YLL035W	GRC3	5.07091	8.37886	7.42211	3.22375e-06	6.51379e-05	4.59028
8577_at	YOL030W	GAS5	5.05714	8.58327	12.9137	3.58757e-09	3.15943e-07	11.5186
6614_at	YDL117W	CYK3	5.05543	8.18304	7.24383	4.24218e-06	8.19891e-05	4.30769
8312_at	YOR246C	NA	5.04812	8.36615	18.3251	3.45567e-11	1.34411e-08	16.0545
5946_at	YDR522C	SPS2	5.04246	8.80985	14.02	1.22551e-09	1.36192e-07	12.5882
5723_at	YER022W	SRB4	5.0344	9.53338	8.71582	4.94733e-07	1.4755e-05	6.51684
9321_at	YMR313C	TGL3	5.02652	8.67106	11.9297	9.98544e-09	7.17031e-07	10.4907
4188_at	YIL076W	SEC28	5.00117	6.91971	18.545	2.94198e-11	1.30778e-08	16.207
5581_at	YER141W	COX15	4.97468	9.64973	8.45513	7.10319e-07	1.956e-05	6.14559
8665_at	YOL124C	TRM11	4.97117	8.15453	14.7586	6.23004e-10	8.42861e-08	13.2565
10055_at	YLR253W	NA	4.94229	8.25457	10.9088	3.11968e-08	1.66412e-06	9.33853
2786_s_at	NA	NA	4.91131	8.38774	10.0672	8.52698e-08	3.79045e-06	8.31561
7640_at	YPR109W	NA	4.90693	6.91877	14.8966	5.50852e-10	7.79122e-08	13.3776
4739_at	YGR263C	NA	4.9033	9.39623	15.4979	3.25924e-10	5.26624e-08	13.8921
5034_at	YGL028C	SCW11	4.88693	7.41561	11.1945	2.249e-08	1.33722e-06	9.6703
9758_at	YML127W	RSC9	4.88543	9.41436	10.6885	4.03452e-08	2.04218e-06	9.0774
9385_at	YMR245W	NA	4.87863	7.8514	10.1682	7.53162e-08	3.4468e-06	8.44215
8023_at	YPL272C	NA	4.87113	8.93258	8.96727	3.51554e-07	1.12005e-05	6.8672
10767_at	YKL195W	MIA40	4.80585	7.33057	18.3791	3.32131e-11	1.34411e-08	16.0921
AFFX-YER022w3_at	NA	NA	4.80339	9.25661	9.71117	1.33086e-07	5.40154e-06	7.86125
7888_at	YPL137C	NA	4.78714	7.63129	5.25927	0.000120428	0.00118711	0.867321
5986_at	YDR472W	TRS31	4.7486	7.40372	14.3181	9.29273e-10	1.12659e-07	12.8621
10333_at	YLL010C	PSR1	4.74509	8.57386	9.88945	1.06329e-07	4.45103e-06	8.09044
4058_at	YIR022W	SEC11	4.73452	6.6692	13.6172	1.79626e-09	1.86312e-07	12.2086
6920_at	YCL057W	PRD1	4.72936	6.89794	6.29047	1.97865e-05	0.000279436	2.72243
8194_at	YOR350C	MNE1	4.72782	6.96025	6.32595	1.86428e-05	0.000266509	2.7837
6485_at	YDL022W	GPD1	4.70651	8.66353	17.1201	8.62702e-11	2.19741e-08	15.1809
2149_at	NA	NA	4.70508	6.85315	9.65956	1.42102e-07	5.71778e-06	7.79427
7218_at	YBR127C	VMA2	4.69063	8.9915	9.89778	1.05227e-07	4.42476e-06	8.10107
4341_at	YHR181W	NA	4.6855	7.64066	16.6075	1.29628e-10	2.88114e-08	14.7884
4207_at	YIL103W	DPH1	4.66987	8.45557	13.2893	2.47004e-09	2.42714e-07	11.8914
11075_at	YJL037W	NA	4.66085	8.39165	11.086	2.54465e-08	1.46631e-06	9.54515
7364_at	YBR004C	GPI18	4.64821	8.78693	17.1074	8.71358e-11	2.19741e-08	15.1713
10980_at	YJR051W	OSM1	4.64576	6.99507	17.5473	6.1962e-11	1.86586e-08	15.4983
10716_at	YKL157W	APE2	4.61758	8.33524	6.504	1.38651e-05	0.000210114	3.08844
5004_at	YGL013C	PDR1	4.6115	8.2826	8.31581	8.6455e-07	2.27982e-05	5.94378
10568_at	YKR005C	NA	4.58922	7.95087	13.2111	2.66745e-09	2.59382e-07	11.8147
9540_at	YMR098C	NA	4.58024	8.25873	10.7628	3.69755e-08	1.89932e-06	9.166
8190_at	YOR346W	REV1	4.57706	5.91547	5.96841	3.42365e-05	0.000428415	2.15847
10169_at	YLR188W	MDL1	4.57672	8.57727	7.15679	4.85798e-06	9.08802e-05	4.16815
5144_at	YGL145W	TIP20	-4.57511	7.11645	-6.62882	1.12953e-05	0.000177511	3.29945
7422_at	YBL075C	SSA3	4.56098	10.069	9.90794	1.039e-07	4.40865e-06	8.11403
4538_at	YHR019C	DED81	4.56019	8.6632	14.2082	1.02849e-09	1.19193e-07	12.7618
10417_at	YLL059C	NA	4.55961	5.97585	15.6654	2.82518e-10	5.07175e-08	14.0317
9569_at	YMR083W	ADH3	4.5553	8.33175	15.6074	2.9681e-10	5.16744e-08	13.9835
4983_g_at	YGR010W	NMA2	-4.55081	10.4129	-15.9251	2.26981e-10	4.50822e-08	14.245
6706_at	YDL202W	MRPL11	4.53656	6.03059	12.207	7.43123e-09	5.63988e-07	10.7881
9164_at	YNL320W	NA	4.52234	6.38673	18.7218	2.58818e-11	1.2826e-08	16.3281
7208_at	YBR162C	TOS1	4.51174	9.74286	11.3485	1.8905e-08	1.14596e-06	9.84609
7749_at	YPL004C	LSP1	-4.5111	9.24859	-8.3732	7.97109e-07	2.14438e-05	6.0272
8311_at	YOR245C	DGA1	4.48531	9.21122	9.01124	3.31401e-07	1.07418e-05	6.9277
10103_at	YLR211C	NA	-4.47494	6.08063	-11.4296	1.72671e-08	1.06747e-06	9.93776
4960_at	YGR033C	TIM21	4.47415	6.75718	13.9549	1.3028e-09	1.43078e-07	12.5276
4560_at	YHL002W	HSE1	-4.46651	8.16619	-7.23869	4.27618e-06	8.24755e-05	4.29947
4982_at	YGR010W	NMA2	-4.46327	8.95682	-9.86787	1.09239e-07	4.53222e-06	8.06288
7857_at	YPL123C	RNY1	4.46112	6.76663	10.2914	6.48255e-08	3.02573e-06	8.59497
8019_s_at	NA	NA	4.42356	7.69092	9.08833	2.98967e-07	9.93188e-06	7.03323
6489_at	YDL018C	ERP3	4.42102	6.56433	8.99383	3.3923e-07	1.09197e-05	6.90377
9625_at	YMR003W	NA	4.4188	6.2213	14.236	1.00234e-09	1.18441e-07	12.7872
6435_at	YDR066C	NA	4.41215	6.38622	13.9049	1.36567e-09	1.46535e-07	12.4808
5042_at	YGL020C	MDM39	4.40372	7.74514	10.6349	4.29723e-08	2.14517e-06	9.01329
5609_at	YER124C	DSE1	4.39998	8.61051	11.0207	2.74202e-08	1.50569e-06	9.46942
6647_at	YDL173W	NA	4.39812	7.30501	12.2329	7.23112e-09	5.57712e-07	10.8156
9878_at	YLR431C	ATG23	-4.38223	5.82412	-15.1511	4.40147e-10	6.77916e-08	13.5979
5408_at	YFL022C	FRS2	4.37889	9.24183	9.03653	3.20367e-07	1.04863e-05	6.9624
6703_at	YDL205C	HEM3	-4.37884	8.63914	-12.6967	4.47017e-09	3.82835e-07	11.2984
11041_at	YJL026W	RNR2	4.37864	9.02957	16.3095	1.65126e-10	3.5033e-08	14.5541
4404_at	YHR111W	UBA4	-4.37179	6.78795	-17.8512	4.91852e-11	1.60946e-08	15.7188
7889_at	YPL136W	NA	4.37073	7.61639	5.90891	3.79462e-05	0.000464866	2.0527
AFFX-YER022wM_at	NA	NA	4.35883	8.77854	11.67	1.32385e-08	8.89077e-07	10.2062
10376_at	YLL054C	NA	4.35486	6.96597	6.04204	3.01648e-05	0.000388934	2.28866
7893_at	YPL132W	COX11	4.35063	7.96979	9.96356	9.69446e-08	4.15127e-06	8.18473
4168_at	YIL049W	DFG10	4.34383	7.14096	15.572	3.05918e-10	5.16744e-08	13.954
9330_at	YMR281W	GPI12	4.3408	7.49646	14.9857	5.09027e-10	7.42464e-08	13.4552
4651_at	NA	NA	4.3405	6.61438	15.3333	3.75599e-10	5.94275e-08	13.7533
11201_at	YJL179W	PFD1	-4.33689	3.81524	-18.7021	2.62515e-11	1.2826e-08	16.3147
9530_at	YMR088C	VBA1	4.32281	7.57219	9.89982	1.04959e-07	4.42476e-06	8.10367
11234_at	YJL192C	SOP4	4.32263	6.50671	14.597	7.20519e-10	9.27143e-08	13.1133
3136_s_at	NA	NA	4.32224	5.08667	4.87121	0.000246611	0.00210965	0.134072
6719_at	YDL234C	GYP7	4.31696	8.40394	6.09152	2.77159e-05	0.000364405	2.37574
6664_at	YDL199C	NA	4.31406	8.30365	7.18564	4.64406e-06	8.82939e-05	4.21451
5615_at	YER087W	NA	4.31195	7.31268	8.09735	1.18194e-06	2.87329e-05	5.62244
8508_at	YOR035C	SHE4	-4.29926	6.7579	-7.87027	1.6459e-06	3.76581e-05	5.28197
9396_at	YMR214W	SCJ1	4.29364	7.6277	9.67099	1.40051e-07	5.65964e-06	7.80913
11221_at	NA	NA	4.29058	5.18811	12.5439	5.22885e-09	4.24446e-07	11.1412
4900_at	YGR110W	NA	4.27929	7.55988	17.1339	8.53442e-11	2.19741e-08	15.1912
4759_at	YGR239C	PEX21	-4.27893	7.28832	-8.38584	7.83025e-07	2.12487e-05	6.04551
5179_at	YGL156W	AMS1	4.2614	5.39602	5.69659	5.49958e-05	0.000623041	1.67141
10765_at	YKL197C	PEX1	-4.26027	9.03338	-5.08194	0.000166698	0.00153767	0.534425
6444_at	YDR030C	RAD28	4.25659	7.96397	6.71205	9.86385e-06	0.000161259	3.43896
9605_at	YMR028W	TAP42	-4.2546	8.12088	-16.9082	1.01949e-10	2.43628e-08	15.0202
7982_at	YPL222W	NA	4.2431	8.38529	6.39361	1.66503e-05	0.000244219	2.90002
7254_at	YBR117C	TKL2	4.22626	7.8854	7.70367	2.10695e-06	4.67549e-05	5.02794
8727_at	YOL153C	NA	4.21773	6.47631	11.7608	1.19885e-08	8.16878e-07	10.3063
8143_at	YOR389W	NA	4.21451	5.77856	5.76796	4.85126e-05	0.000568212	1.80026
7130_g_at	YBR220C	NA	4.21324	7.97771	12.9707	3.3881e-09	3.07067e-07	11.5758
8645_at	YOL098C	NA	4.21164	6.50142	6.96315	6.59127e-06	0.00011544	3.85401
9575_at	YMR042W	ARG80	4.21075	7.40538	7.68095	2.17972e-06	4.81263e-05	4.99301
10244_at	YLR080W	EMP46	4.20966	6.16734	7.79839	1.83019e-06	4.10693e-05	5.17281
4934_at	YGR053C	NA	4.20167	6.84177	11.6107	1.4129e-08	9.28835e-07	10.1405
6292_at	YDR190C	RVB1	4.19715	8.81624	10.1682	7.53237e-08	3.4468e-06	8.44205
7988_at	YPL216W	NA	4.19089	5.26752	5.47602	8.13973e-05	0.000860003	1.26893
7361_at	YBR001C	NTH2	4.19063	9.10389	9.09423	2.96627e-07	9.88935e-06	7.04128
6615_at	YDL116W	NUP84	4.1878	7.85887	6.02885	3.08552e-05	0.000395072	2.26539
7842_at	YPL093W	NOG1	4.1855	8.34737	6.52264	1.3445e-05	0.000204413	3.1201
5433_at	YFL047W	RGD2	4.1775	8.76442	7.2032	4.51871e-06	8.62621e-05	4.24268
8364_at	YOR207C	RET1	4.17054	6.42436	6.0424	3.01463e-05	0.000388934	2.28929
9376_at	YMR237W	NA	4.16689	8.48856	4.71275	0.000332263	0.00267386	-0.170145
8254_at	YOR278W	HEM4	4.16406	6.9096	14.405	8.58055e-10	1.08242e-07	12.9409
10878_at	YJR130C	STR2	-4.16323	8.94208	-5.49891	7.81274e-05	0.000831468	1.31099
6361_at	YDR126W	SWF1	4.15752	6.61219	8.56289	6.11105e-07	1.72457e-05	6.30005
11210_at	YJL173C	RFA3	-4.15171	5.23517	-11.6307	1.38221e-08	9.15101e-07	10.1627
6243_at	YDR232W	HEM1	4.15076	9.64086	17.9387	4.60536e-11	1.60946e-08	15.7815
2614_s_at	NA	NA	4.14402	5.0749	5.98367	3.33476e-05	0.000420108	2.18551
11119_at	YJL083W	TAX4	-4.13925	8.94333	-8.57621	5.99899e-07	1.70733e-05	6.31905
5988_at	YDR474C	NA	4.1303	9.21247	9.1286	2.83377e-07	9.54992e-06	7.08809
8551_at	YOL011W	PLB3	4.12837	9.56286	6.33556	1.83454e-05	0.000263064	2.80025
10265_at	YLR056W	ERG3	4.11856	8.38296	11.0574	2.62919e-08	1.48654e-06	9.51202
5760_at	YEL030W	ECM10	4.11506	9.47923	8.57241	6.03077e-07	1.71116e-05	6.31363
7173_at	YBR171W	SEC66	4.09798	5.46077	13.596	1.83318e-09	1.88052e-07	12.1884
7088_at	YBR270C	NA	4.09517	9.81958	10.5096	4.98646e-08	2.42441e-06	8.86203
4985_at	YGR012W	NA	4.09155	7.31787	11.9652	9.61165e-09	6.9554e-07	10.5291
2781_at	NA	NA	4.07462	5.76781	6.11173	2.67763e-05	0.000354549	2.41121
7415_at	YBL037W	APL3	4.06353	6.54118	6.39522	1.66057e-05	0.000244118	2.90278
5767_at	YEL023C	NA	4.05784	7.11331	6.83535	8.08379e-06	0.000135968	3.64385
8506_at	YOR033C	EXO1	4.05193	8.09761	6.37086	1.72941e-05	0.000251858	2.86098
4155_at	YIL062C	ARC15	-4.03772	6.99056	-12.2254	7.28879e-09	5.57712e-07	10.8076
4653_at	NA	NA	4.02504	6.23896	8.79334	4.44946e-07	1.36183e-05	6.62564
4390_at	YHR140W	NA	4.02373	6.54901	11.2487	2.11526e-08	1.26576e-06	9.73238
11056_at	YJL012C	VTC4	4.0197	11.0618	10.7848	3.6035e-08	1.86881e-06	9.19217
8948_at	YNL084C	END3	4.01282	6.62665	14.1308	1.1051e-09	1.25806e-07	12.6907
4063_at	YIR027C	DAL1	4.01079	7.05262	8.49125	6.75285e-07	1.87613e-05	6.19753
11076_at	YJL036W	SNX4	3.99983	9.01901	15.7964	2.52886e-10	4.78435e-08	14.1398
5305_at	YFR051C	RET2	3.99883	6.99768	5.12338	0.000154445	0.00144174	0.612554
7862_at	YPL118W	MRP51	3.99842	5.62085	11.3062	1.9825e-08	1.19398e-06	9.798
2779_s_at	NA	NA	3.99179	7.07889	9.08211	3.01452e-07	9.97892e-06	7.02475
4328_at	NA	NA	-3.9856	9.2507	-8.23312	9.72534e-07	2.5079e-05	5.82285
9133_at	YNL261W	ORC5	3.98066	7.22199	10.3135	6.31119e-08	2.96055e-06	8.62225
11392_at	YAL056W	GPB2	3.96843	6.03097	5.68419	5.62117e-05	0.00063374	1.64895
7793_at	YPL050C	MNN9	3.96672	8.64974	10.3879	5.76885e-08	2.73361e-06	8.71373
10804_at	YKL208W	CBT1	3.9593	7.49795	11.8561	1.08111e-08	7.64555e-07	10.4106
8547_at	YOL015W	NA	3.95614	7.87867	8.80847	4.35858e-07	1.3384e-05	6.64681
6202_at	YDR282C	NA	3.95486	9.79459	10.999	2.81134e-08	1.52581e-06	9.4441
11371_at	YAL038W	CDC19	3.953	6.75816	18.2523	3.64619e-11	1.36149e-08	16.0036
7949_at	YPL209C	IPL1	3.93906	9.11448	8.28264	9.06258e-07	2.35083e-05	5.89537
7892_at	YPL133C	RDS2	3.93183	6.18632	7.16602	4.7884e-06	9.03379e-05	4.183
7066_at	YBR293W	VBA2	3.92182	9.31785	6.78859	8.71537e-06	0.000145023	3.5664
8954_at	YNL078W	NIS1	-3.92146	8.20953	-15.9375	2.24638e-10	4.50822e-08	14.2551
8947_at	YNL085W	MKT1	3.92035	6.05248	7.59527	2.47885e-06	5.2591e-05	4.86069
11068_at	YJL045W	NA	3.91379	8.81803	9.14367	2.77768e-07	9.42896e-06	7.10857
6056_at	YDR405W	MRP20	3.90705	7.13272	7.93181	1.50371e-06	3.50054e-05	5.37489
7791_at	YPL052W	OAZ1	3.89762	6.77062	10.6923	4.01631e-08	2.04218e-06	9.08199
5242_at	YGL227W	VID30	3.8937	6.49341	5.53568	7.31586e-05	0.000786792	1.37842
9542_at	YMR100W	MUB1	3.88964	7.32569	6.24108	2.1502e-05	0.000298692	2.63688
9010_at	YNL158W	NA	3.88657	5.00604	6.14482	2.53097e-05	0.000339673	2.46915
5977_at	YDR508C	GNP1	3.87189	10.0674	9.63529	1.46565e-07	5.77292e-06	7.76267
7073_at	YBR300C	NA	3.86139	5.43402	7.85104	1.6932e-06	3.84575e-05	5.25283
5366_s_at	YFR024C-A	LSB3	3.856	9.91999	17.4047	6.91453e-11	2.0171e-08	15.3932
10212_at	YLR138W	NHA1	3.85242	6.86705	6.55053	1.28418e-05	0.000197168	3.16736
7669_at	YPR093C	ASR1	3.84956	6.90359	11.0552	2.63563e-08	1.48654e-06	9.50954
9178_at	YNL306W	MRPS18	3.84955	8.40841	9.4541	1.84971e-07	6.93915e-06	7.52473
7381_at	YBL026W	LSM2	3.8434	6.5208	13.4455	2.12034e-09	2.12832e-07	12.0435
6907_at	YCL025C	AGP1	3.83762	7.2729	9.43099	1.9059e-07	7.06015e-06	7.49412
7186_at	YBR185C	MBA1	3.81516	7.07634	11.0086	2.7804e-08	1.51784e-06	9.45532
9336_at	YMR287C	MSU1	3.81432	5.92082	5.35428	0.000101349	0.0010217	1.04409
8934_at	YNL053W	MSG5	-3.81048	7.28076	-9.42194	1.9284e-07	7.11527e-06	7.48211
10943_at	YJR059W	PTK2	3.79384	7.51758	4.69575	0.000343126	0.00275415	-0.202943
7174_at	YBR172C	SMY2	3.79001	7.73854	7.90515	1.56364e-06	3.60409e-05	5.3347
7787_at	YPL011C	TAF3	3.78366	6.59526	19.0194	2.09136e-11	1.2826e-08	16.5289
5020_at	YGR003W	CUL3	3.78165	6.05718	6.1223	2.62985e-05	0.000350209	2.42973
4952_at	YGR071C	NA	-3.77933	3.93041	-5.44027	8.67914e-05	0.000908294	1.2031
5762_at	YEL028W	NA	3.77806	7.54684	11.1793	2.28815e-08	1.35189e-06	9.65281
6117_at	YDR331W	GPI8	3.77564	8.65259	9.3009	2.25789e-07	7.93201e-06	7.3207
10331_at	YLL012W	YEH1	3.76692	8.51409	8.17837	1.05182e-06	2.61834e-05	5.74232
8540_at	YOR022C	NA	3.7643	7.09337	6.33886	1.82443e-05	0.00026242	2.80594
10247_at	YLR083C	EMP70	3.76177	7.49423	5.49773	7.82925e-05	0.000831468	1.30883
4150_at	YIL068C	SEC6	3.75636	8.15869	3.72049	0.00227959	0.0126742	-2.11945
6876_at	YCL002C	NA	3.75558	4.6231	14.2658	9.7515e-10	1.16705e-07	12.8144
10523_at	YKR051W	NA	3.75541	10.042	12.0623	8.66415e-09	6.36849e-07	10.6337
7293_at	YBR070C	ALG14	3.75056	7.05497	6.85154	7.8765e-06	0.000133929	3.6706
3854_f_at	YKL225W	NA	-3.74123	7.06516	-8.44167	7.23861e-07	1.98743e-05	6.1262
10991_at	YJR014W	NA	3.73509	5.89778	8.66159	5.3306e-07	1.53584e-05	6.44028
3506_s_at	NA	NA	3.73208	4.84456	8.56243	6.11498e-07	1.72457e-05	6.29939
9204_at	YNL326C	NA	3.71113	7.2584	8.18398	1.0434e-06	2.60433e-05	5.75057
4136_at	YIL035C	CKA1	-3.70946	6.9311	-14.6869	6.64411e-10	8.86039e-08	13.1932
10213_at	YLR139C	SLS1	3.70556	10.4583	8.45721	7.08247e-07	1.956e-05	6.14859
11096_at	YJL061W	NUP82	3.69912	6.34466	4.8975	0.000234779	0.00202183	0.184292
10947_at	YJR063W	RPA12	-3.69697	6.50612	-9.51156	1.7175e-07	6.59788e-06	7.60057
4198_at	YIL113W	SDP1	-3.69184	8.36825	-9.791	1.20313e-07	4.90445e-06	7.9643
4080_at	YIL002C	INP51	3.69008	6.71437	6.25196	2.1111e-05	0.000295459	2.65577
7634_at	YPR103W	PRE2	3.67546	7.41914	12.8287	3.90908e-09	3.37882e-07	11.4327
7899_at	YPL126W	NAN1	3.67422	5.83319	4.97182	0.000204413	0.00180529	0.325829
3249_s_at	NA	NA	3.67132	4.76569	4.0927	0.00109572	0.00712793	-1.38184
7379_i_at	YBL026W	LSM2	3.67051	4.01367	21.0265	5.3618e-12	4.55022e-09	17.794
7576_at	YPR178W	PRP4	3.64784	7.19723	6.69213	1.01881e-05	0.000164829	3.40565
9117_at	YNL231C	PDR16	-3.64172	7.84472	-8.97708	3.46944e-07	1.10915e-05	6.88072
10536_at	YKR019C	IRS4	-3.63106	8.25825	-6.21126	2.26129e-05	0.000311344	2.58506
10562_at	YKL002W	DID4	-3.62905	5.53529	-7.57984	2.53717e-06	5.37063e-05	4.83676
4892_at	YGR102C	NA	3.62668	5.5015	8.12865	1.12976e-06	2.76807e-05	5.66885
10269_at	YLR060W	FRS1	3.61962	9.89113	8.7732	4.57345e-07	1.39133e-05	6.59745
11097_at	YJL060W	BNA3	3.61765	7.99879	15.0587	4.77282e-10	7.17484e-08	13.5184
3250_s_at	NA	NA	3.61373	4.67893	4.49199	0.000505801	0.00378641	-0.598052
8928_at	YNL059C	ARP5	-3.61024	5.83049	-5.23855	0.000125064	0.00122377	0.828622
9082_at	YNL221C	POP1	3.60521	8.8467	5.54383	7.21027e-05	0.000779929	1.39334
4250_at	YIL151C	NA	3.59618	4.76768	3.56727	0.00308907	0.0162276	-2.42356
8598_at	YOL053W	NA	3.58572	9.48603	13.3264	2.38173e-09	2.36526e-07	11.9277
3555_s_at	NA	NA	-3.58555	6.69392	-5.05316	0.000175798	0.00159878	0.480045
8488_at	YOR060C	NA	3.58346	6.01239	12.5224	5.34611e-09	4.30223e-07	11.119
5172_at	YGL163C	RAD54	3.5768	6.74549	4.34922	0.000665646	0.00473975	-0.877038
5978_at	YDR509W	NA	3.57242	9.51437	10.0193	9.04666e-08	3.96482e-06	8.25528
8889_at	YNL006W	LST8	3.56825	8.25604	9.32739	2.18098e-07	7.74125e-06	7.35617
9693_at	YML061C	PIF1	3.56582	5.82665	5.294	0.000113053	0.00111914	0.932072
8425_s_at	YOR133W	EFT1orEFT2	3.56361	7.18789	7.81541	1.78467e-06	4.02413e-05	5.19871
6573_at	YDL113C	ATG20	3.54513	6.41982	8.18718	1.03862e-06	2.60433e-05	5.7553
8173_at	YOR374W	ALD4	3.54283	7.34789	7.52251	2.76691e-06	5.77832e-05	4.74756
7832_at	YPL057C	SUR1	3.53959	7.32057	10.7615	3.70301e-08	1.89932e-06	9.1645
6648_at	YDL172C	NA	3.53428	8.01069	13.9264	1.33826e-09	1.45264e-07	12.501
2548_at	NA	NA	-3.53146	6.93798	-4.89808	0.000234526	0.00202183	0.185395
6722_at	YDL231C	BRE4	3.52973	6.98702	4.052	0.00118652	0.00760352	-1.46227
3895_s_at	NA	NA	-3.52292	6.72441	-5.44053	8.67515e-05	0.000908294	1.20358
5627_at	YER096W	SHC1	3.51811	7.60704	6.07796	2.83655e-05	0.000368791	2.35191
9456_at	YMR186W	HSC82orHSP82	3.51394	8.06751	7.93683	1.4927e-06	3.4836e-05	5.38244
6570_at	YDL074C	BRE1	-3.51048	10.2053	-8.98	3.45588e-07	1.10861e-05	6.88474
7287_at	YBR064W	NA	3.50796	7.67661	10.6858	4.04716e-08	2.04218e-06	9.07422
7274_at	YBR093C	PHO5	3.50414	7.56378	3.85961	0.0017317	0.0101906	-1.84336
9978_at	YLR354C	TAL1	-3.50318	7.44699	-11.03	2.71313e-08	1.5018e-06	9.48015
5969_at	YDR500C	RPL37B	3.5017	6.93317	6.63661	1.11524e-05	0.000175836	3.31256
8592_at	YOL059W	GPD2	3.48471	10.672	9.45487	1.84788e-07	6.93915e-06	7.52574
11195_at	YJL185C	NA	3.47985	6.78566	8.72702	4.87188e-07	1.45945e-05	6.53261
9086_at	YNL217W	NA	3.47076	6.98503	7.94827	1.46792e-06	3.43433e-05	5.39966
8272_at	YOR295W	UAF30	-3.46961	5.26384	-12.5645	5.11927e-09	4.24446e-07	11.1625
5130_at	YGL112C	TAF6	3.46755	7.42656	9.41187	1.95376e-07	7.15231e-06	7.46875
7075_at	YBR219C	NA	3.46706	6.51769	12.4384	5.83257e-09	4.61416e-07	11.0316
7131_at	YBR221C	PDB1	3.44175	6.73763	9.34194	2.13992e-07	7.62449e-06	7.37562
10756_at	YKL163W	PIR3	-3.44175	6.41541	-8.33966	8.3582e-07	2.2229e-05	5.97849
9383_at	YMR244W	NA	3.42096	8.53308	12.6623	4.63029e-09	3.92943e-07	11.2631
5294_at	NA	NA	3.4106	5.14595	5.7982	4.60117e-05	0.000545075	1.85464
4864_at	YGR163W	GTR2	3.40378	7.6906	9.7922	1.2013e-07	4.90445e-06	7.96585
11293_at	YAR031W	PRM9	-3.39494	4.4431	-11.8127	1.13315e-08	7.83549e-07	10.3632
9384_at	YMR244C-A	NA	3.39273	7.79805	9.45526	1.84694e-07	6.93915e-06	7.52626
6560_at	YDL082W	RPL13BorRPL13A	3.3921	8.78545	8.15395	1.08938e-06	2.70462e-05	5.70626
4751_at	YGR231C	PHB2	3.39076	8.09369	8.70339	5.03256e-07	1.49139e-05	6.49932
8232_at	YOR299W	BUD7	3.38986	8.1783	6.07635	2.84439e-05	0.000369296	2.34907
11059_at	YJL053W	PEP8	-3.38285	7.25176	-8.38073	7.88685e-07	2.13402e-05	6.03812
7664_at	YPR088C	SRP54	3.37966	8.94759	11.8836	1.04944e-08	7.47827e-07	10.4406
10528_at	YKR056W	TRM2	3.37743	9.38458	5.70691	5.40054e-05	0.000616308	1.69007
9343_at	YMR293C	NA	3.37544	6.77887	7.44368	3.11928e-06	6.34389e-05	4.62419
7101_at	YBR283C	SSH1	3.37535	9.85601	6.30186	1.94115e-05	0.000275808	2.74213
10779_at	YKL184W	SPE1	3.37515	9.41938	11.4889	1.61654e-08	1.01901e-06	10.0044
6257_at	YDR200C	VPS64	3.3742	9.86169	7.03577	5.8752e-06	0.000105674	3.97242
10661_at	YKL079W	SMY1	-3.3712	10.5156	-6.97928	6.42465e-06	0.000113373	3.88037
7779_at	YPL019C	VTC3	3.36772	7.82431	3.8361	0.00181389	0.0105763	-1.88999
7429_at	YBL067C	UBP13	3.36713	8.60921	5.3227	0.000107314	0.00107142	0.985466
5938_at	YDR514C	NA	3.36284	10.3468	9.28805	2.29622e-07	7.99822e-06	7.30347
5381_at	YFL007W	BLM3	3.36271	6.81924	3.10371	0.0077678	0.0345626	-3.33781
7482_at	YBL104C	NA	3.35991	6.41995	6.13956	2.55369e-05	0.000341529	2.45996
4429_at	YHR093W	NA	3.34987	6.54919	10.2329	6.95967e-08	3.21626e-06	8.52263
5385_at	YFL003C	MSH4	3.34126	6.75454	3.97862	0.00137014	0.00851161	-1.60748
6910_at	YCL017C	NFS1	3.33614	11.4072	12.0849	8.45786e-09	6.2662e-07	10.6579
5692_at	YER037W	PHM8	-3.33131	6.70443	-9.30097	2.25768e-07	7.93201e-06	7.3208
4758_at	YGR238C	KEL2	-3.32264	6.14083	-3.56633	0.00309481	0.0162486	-2.42541
5649_at	YER076C	NA	-3.32169	10.26	-7.15915	4.84009e-06	9.07274e-05	4.17195
8466_at	YOR085W	OST3	3.31228	8.83346	11.0527	2.64344e-08	1.48654e-06	9.50654
2778_g_at	NA	NA	3.31058	5.84854	9.45042	1.85854e-07	6.9398e-06	7.51986
5567_at	YER127W	LCP5	-3.30991	7.04589	-10.9298	3.04472e-08	1.63368e-06	9.3632
2358_at	NA	NA	3.3051	6.16016	6.42967	1.5681e-05	0.000231985	2.96175
7246_at	YBR110W	ALG1	3.3034	9.11352	9.13686	2.80286e-07	9.47997e-06	7.09933
8511_at	YOR038C	HIR2	-3.30118	7.16546	-7.08761	5.41438e-06	9.92992e-05	4.05651
9208_at	YNL322C	KRE1	3.29942	9.64329	7.80712	1.8067e-06	4.06398e-05	5.1861
5663_at	YER051W	NA	3.29252	6.57681	10.5478	4.76473e-08	2.32873e-06	8.90829
9630_at	YMR008C	PLB1	3.29031	9.37814	7.37172	3.48241e-06	6.99104e-05	4.51084
10038_i_at	YLR280C	NA	-3.28703	8.88056	-8.0575	1.2521e-06	3.02024e-05	5.56316
4133_at	YIL038C	NOT3	-3.27952	7.27095	-5.25666	0.000121003	0.00118873	0.862443
10015_at	YLR300W	EXG1	3.27478	8.26329	7.89175	1.59472e-06	3.65766e-05	5.31446
6714_at	YDL239C	ADY3	-3.2732	8.77687	-5.65721	5.89545e-05	0.00065988	1.60003
6874_at	YCL005W	NA	3.26152	6.78664	8.33431	8.42179e-07	2.23345e-05	5.97071
6815_at	YCR073W-A	SOL2	-3.25932	10.0359	-11.5352	1.5356e-08	9.93329e-07	10.0563
4825_at	YGR170W	PSD2	3.25225	4.87704	4.94782	0.000213747	0.00187179	0.280191
4127_at	YIL044C	AGE2	-3.24769	6.1845	-8.21872	9.92763e-07	2.5487e-05	5.8017
5679_at	YER024W	YAT2	-3.24727	7.41697	-4.48373	0.000513875	0.00382233	-0.614156
10445_s_at	YKL201C	MNN4	3.23996	7.87281	6.77492	8.90969e-06	0.000147468	3.5437
5774_at	YEL060C	PRB1	3.23143	8.92478	5.6035	6.48402e-05	0.000712098	1.50232
5719_at	YER019W	ISC1	3.22808	8.70723	8.20158	1.01741e-06	2.58086e-05	5.7765
4431_at	YHR095W	NA	3.22624	6.96706	7.13894	4.99552e-06	9.28949e-05	4.13941
9921_at	YLR386W	VAC14	3.22401	6.50886	3.62895	0.00273303	0.0147003	-2.30115
3556_s_at	NA	NA	-3.22316	6.66636	-5.04251	0.000179296	0.00162656	0.459889
6160_at	YDR328C	SKP1	-3.22046	8.18131	-8.67624	5.22406e-07	1.52396e-05	6.461
6005_at	YDR444W	NA	3.21998	10.1774	5.71021	5.36922e-05	0.000613484	1.69605
5944_at	YDR520C	NA	3.21693	8.37341	3.63174	0.00271797	0.0146406	-2.29562
9924_at	YLR389C	STE23	3.21469	5.8017	4.31817	0.000706806	0.00495348	-0.937915
7989_at	YPL215W	CBP3	3.21072	7.19444	10.4465	5.37719e-08	2.58742e-06	8.78528
2341_g_at	NA	NA	3.20952	7.27339	6.34661	1.80092e-05	0.000259839	2.81929
10199_at	YLR125W	NA	-3.20916	5.14144	-11.4988	1.59871e-08	1.01524e-06	10.0156
10094_at	YLR246W	ERF2	3.20673	6.88967	14.0801	1.1585e-09	1.30296e-07	12.6439
10521_at	YKR049C	NA	-3.20007	5.92992	-6.66541	1.06408e-05	0.000170381	3.3609
9695_at	YML059C	NTE1	3.19925	3.89064	6.02009	3.13228e-05	0.00039881	2.24992
6431_at	YDR062W	LCB2	3.19499	11.1973	13.198	2.70215e-09	2.60047e-07	11.8018
10678_at	YKL106W	AAT1	3.1912	10.2373	16.5223	1.38861e-10	3.01459e-08	14.7218
10677_at	YKL107W	NA	3.18699	7.82112	9.26572	2.36448e-07	8.20537e-06	7.27349
5717_at	YER017C	AFG3	3.17486	9.56334	7.32565	3.73808e-06	7.393e-05	4.43792
6717_at	YDL236W	PHO13	-3.16967	4.44586	-4.64983	0.000374331	0.00294636	-0.291655
11044_at	YJL023C	PET130	3.16336	6.58255	8.34742	8.26692e-07	2.21122e-05	5.98977
7748_at	YPL005W	AEP3	3.15949	7.99764	7.07124	5.55563e-06	0.000100898	4.03
8179_at	YOR380W	RDR1	-3.15261	9.4198	-5.22321	0.000128617	0.00125067	0.799927
11370_at	YAL039C	CYC3	3.14959	8.72502	5.15984	0.000144438	0.0013712	0.681123
8210_at	YOR320C	GNT1	3.14747	7.04531	5.3775	9.7183e-05	0.000989532	1.08713
5390_at	YFL041W	FET5	3.14634	6.85055	6.31927	1.88528e-05	0.000269099	2.77218
8180_at	YOR381W	FRE3	3.14554	7.65976	3.67804	0.00247955	0.0136397	-2.20372
5351_at	YFR009W	GCN20	-3.14553	9.12201	-5.15819	0.000144875	0.00137161	0.67803
10902_at	YJR109C	CPA2	-3.14478	5.9983	-3.5445	0.00323201	0.0168364	-2.46872
10949_at	YJR065C	ARP3	3.14212	8.32657	5.67161	5.74734e-05	0.000646403	1.62615
6091_at	YDR394W	RPT3	3.14013	6.54796	10.021	9.02773e-08	3.96482e-06	8.25742
10063_i_at	YLR261C	NA	-3.13403	7.40589	-9.45359	1.85094e-07	6.93915e-06	7.52405
7822_at	YPL067C	NA	-3.12866	6.93561	-8.90946	3.80045e-07	1.19051e-05	6.78731
4916_at	YGR080W	TWF1	-3.12276	9.58719	-9.17199	2.67541e-07	9.14834e-06	7.14699
8456_at	YOR119C	RIO1	-3.12082	6.7489	-8.19276	1.03034e-06	2.59468e-05	5.76352
7667_at	YPR091C	NA	3.11613	7.19573	4.95518	0.000210837	0.00184977	0.294201
10495_at	YKR070W	NA	3.11137	9.68252	14.6286	7.00266e-10	9.20701e-08	13.1414
5750_at	YEL040W	UTR2	3.11072	7.35138	8.14833	1.09822e-06	2.71213e-05	5.69796
11256_at	YJL216C	NA	3.11071	7.01674	9.84418	1.12531e-07	4.64814e-06	8.03257
5259_at	YGL254W	FZF1	-3.1029	5.82831	-14.3259	9.2257e-10	1.12659e-07	12.8692
5362_at	YFR020W	NA	3.10023	7.11928	6.29344	1.96877e-05	0.000278462	2.72758
6330_at	YDR139C	RUB1	-3.09953	4.57521	-8.14328	1.10622e-06	2.71753e-05	5.69049
8973_at	YNL104C	LEU4	3.09523	8.70275	5.37466	9.76826e-05	0.000992239	1.08187
9955_at	YLR374C	NA	3.09365	7.32221	8.72613	4.87785e-07	1.45945e-05	6.53135
2276_at	NA	NA	3.09155	6.96179	6.07418	2.85495e-05	0.000369833	2.34526
6329_at	YDR139C	RUB1	-3.08973	5.90007	-7.36769	3.50403e-06	7.0043e-05	4.50447
6041_at	YDR434W	GPI17	3.08917	9.83576	6.43281	1.55993e-05	0.000231878	2.96713
10237_at	YLR118C	NA	-3.08917	5.10764	-10.5754	4.61085e-08	2.27737e-06	8.94168
9428_at	YMR201C	RAD14	3.08646	7.9002	10.9297	3.04511e-08	1.63368e-06	9.36307
7575_at	YPR177C	NA	3.08431	6.23738	6.48997	1.41899e-05	0.000214341	3.0646
10364_at	YLL022C	HIF1	-3.08065	7.03308	-12.551	5.19097e-09	4.24446e-07	11.1485
4898_at	YGR108W	CLB1	3.07841	8.87028	9.03442	3.21273e-07	1.04863e-05	6.9595
5533_at	YER184C	NA	3.07673	9.60551	6.09828	2.73977e-05	0.00036124	2.38761
8275_at	YOR254C	SEC63	3.07472	6.16732	4.28248	0.000757353	0.00524083	-1.00796
6575_at	YDL111C	RRP42	3.06788	5.57118	8.02723	1.30832e-06	3.13158e-05	5.51801
5632_at	YER101C	AST2	-3.06727	6.80476	-3.94336	0.00146842	0.00897103	-1.67731
7128_at	YBR218C	PYC2	3.06724	8.07921	4.68434	0.000350614	0.00279742	-0.224951
6036_at	YDR430C	CYM1	3.06405	5.88795	4.63785	0.000382937	0.00300397	-0.314814
10585_at	YKL022C	CDC16	3.06375	6.06488	4.16926	0.00094368	0.00627439	-1.23077
8037_at	YPL258C	THI21	3.06102	7.5353	3.91215	0.00156142	0.00943419	-1.73917
7410_at	YBL042C	FUI1	3.05553	8.39862	3.82049	0.00187063	0.0108126	-1.92095
7414_at	YBL038W	MRPL16	3.05337	6.57351	8.71233	4.97113e-07	1.47788e-05	6.51192
11253_s_at	YJL219W	HXT11orHXT9orHXT12	3.04793	8.39493	11.5309	1.54293e-08	9.93329e-07	10.0515
8206_at	YOR316C	COT1	3.04117	8.86943	5.66819	5.78217e-05	0.000649537	1.61995
7596_at	YPR153W	NA	3.0384	7.45539	9.60459	1.52425e-07	5.92871e-06	7.7226
4190_at	YIL074C	SER33	-3.03678	7.0166	-7.62929	2.3552e-06	5.07755e-05	4.91334
8512_at	YOR039W	CKB2	3.03359	6.14736	8.69041	5.12317e-07	1.50867e-05	6.48101
4392_at	YHR143W	DSE2	3.02989	7.08369	6.69841	1.00847e-05	0.000163439	3.41616
2780_at	NA	NA	3.02753	6.71809	5.60716	6.442e-05	0.000709151	1.50899
7755_at	YPR003C	NA	3.02271	7.15955	5.15834	0.000144837	0.00137161	0.678303
10691_at	YKL094W	YJU3	3.02098	8.67413	9.65069	1.43716e-07	5.74172e-06	7.78273
2359_at	NA	NA	3.01972	6.351	8.84158	4.1666e-07	1.28792e-05	6.693
5270_at	YGL243W	TAD1	-3.01572	7.76499	-5.05287	0.000175892	0.00159878	0.479498
4709_at	YGR279C	SCW4	3.01431	9.33777	11.4694	1.65189e-08	1.02802e-06	9.98256
7167_at	YBR211C	AME1	-3.01271	6.35051	-11.0375	2.68978e-08	1.5018e-06	9.48892
5364_at	YFR022W	ROG3	3.01192	8.65656	6.8624	7.7406e-06	0.0001321	3.68852
9072_at	YNL187W	NA	3.0072	6.72539	7.47356	2.98045e-06	6.10595e-05	4.67105
10534_at	YKR017C	NA	3.00436	6.40114	10.0803	8.39056e-08	3.76567e-06	8.33206
5379_at	YFL009W	CDC4	2.99871	5.03873	5.51952	7.52997e-05	0.000807958	1.34882
8235_at	YOR301W	RAX1	2.98734	9.65486	7.74848	1.97089e-06	4.4015e-05	5.09662
4224_at	YIL132C	CSM2	-2.98602	6.48303	-7.47378	2.97947e-06	6.10595e-05	4.67139
7964_at	YPL196W	OXR1	-2.98422	5.55344	-10.5995	4.48132e-08	2.22516e-06	8.97065
10651_at	YKL088W	NA	-2.98127	9.2476	-6.35136	1.78666e-05	0.000258794	2.82746
7341_at	YBR028C	NA	2.97742	6.64776	10.6443	4.24989e-08	2.13294e-06	9.02455
9201_at	YNL329C	PEX6	2.97608	6.41468	3.94698	0.00145802	0.00891332	-1.67015
9668_at	YML042W	CAT2	-2.9711	4.76852	-5.63788	6.10061e-05	0.00067716	1.5649
7221_at	YBR130C	SHE3	-2.97023	9.96278	-5.37244	9.80767e-05	0.000994122	1.07774
7761_at	YPR009W	SUT2	-2.96997	7.30336	-11.1018	2.49916e-08	1.44905e-06	9.56343
11103_at	YJL099W	CHS6	-2.96479	10.5744	-6.44035	1.54054e-05	0.000229361	2.98
11098_at	YJL059W	YHC3	2.96175	7.72898	7.83618	1.73073e-06	3.92145e-05	5.23028
7393_at	YBL014C	RRN6	-2.9561	8.93298	-2.12113	0.0522295	0.149871	-5.16126
9533_at	YMR091C	NPL6	-2.95568	7.05488	-4.6563	0.00036976	0.0029153	-0.279137
AFFX-YER022w5_at	NA	NA	2.95271	6.3359	6.53064	1.3269e-05	0.000202395	3.13367
8859_at	YNR011C	PRP2	-2.95015	7.26944	-4.87905	0.00024302	0.00208702	0.149053
7245_at	YBR109C	CMD1	-2.94737	9.14041	-10.5517	4.74282e-08	2.32873e-06	8.91298
4761_at	YGR241C	YAP1802	2.94559	8.65214	7.89667	1.58324e-06	3.64028e-05	5.32189
10570_at	YKR007W	MEH1	-2.94034	5.2425	-9.2229	2.50148e-07	8.62948e-06	7.21582
4935_at	YGR054W	NA	2.94017	6.66004	7.48262	2.93965e-06	6.07116e-05	4.68523
8904_at	YNL037C	IDH1	2.93367	5.26079	5.96015	3.47281e-05	0.000432826	2.14381
5143_at	YGL146C	NA	2.91397	7.85051	9.41265	1.95177e-07	7.15231e-06	7.46979
5428_at	YFL052W	NA	2.91159	6.97642	4.77088	0.000297738	0.00245963	-0.0582426
5698_at	YER043C	SAH1	-2.90773	6.52774	-7.52947	2.73787e-06	5.73051e-05	4.75841
10135_at	YLR200W	YKE2	-2.90347	3.97506	-7.67219	2.20848e-06	4.8623e-05	4.97952
4748_at	YGR272C	NA	-2.89863	5.88327	-4.99022	0.000197543	0.00175625	0.36078
5210_at	YGL215W	CLG1	2.89835	7.53324	5.92285	3.70409e-05	0.000454969	2.07753
8282_at	YOR261C	RPN8	-2.89505	4.98761	-6.79699	8.5983e-06	0.000143672	3.58033
4810_at	YGR200C	ELP2	-2.89066	6.54566	-6.54703	1.29158e-05	0.000197654	3.16144
5945_at	YDR521W	NA	2.88194	9.47075	5.8438	4.24919e-05	0.000511162	1.93641
4160_at	YIL057C	NA	-2.88119	6.97648	-6.66412	1.06631e-05	0.000170445	3.35875
4762_at	YGR242W	NA	2.88109	6.38144	9.63682	1.4628e-07	5.77292e-06	7.76466
7548_at	YPR196W	NA	2.87982	9.1904	7.70315	2.1086e-06	4.67549e-05	5.02714
8827_at	YNR024W	NA	-2.87045	4.94662	-6.65933	1.07467e-05	0.000171488	3.35071
6363_at	YDR128W	NA	2.86687	5.58847	3.1987	0.00643077	0.0297479	-3.15173
6147_at	YDR316W	OMS1	2.86679	8.36144	7.05605	5.69016e-06	0.000103141	4.00536
8696_at	YOL138C	NA	2.8575	5.03261	3.7349	0.00221546	0.0123989	-2.09083
10125_at	YLR190W	MMR1	2.85667	8.64451	4.25643	0.000796592	0.00545175	-1.05917
3252_s_at	NA	NA	2.85589	4.48919	3.60525	0.00286464	0.0152721	-2.34819
2235_at	NA	NA	2.85539	6.87487	3.76542	0.0020857	0.0118	-2.03026
3081_at	NA	NA	2.85342	6.4929	5.06482	0.00017205	0.00157809	0.502091
6228_at	YDR263C	DIN7	2.85185	9.73468	16.721	1.18339e-10	2.69438e-08	14.8764
6701_at	YDL207W	GLE1	2.85109	5.42395	6.64699	1.09652e-05	0.000173491	3.32999
11012_at	YJL009W	NA	2.84939	7.28913	8.07762	1.21615e-06	2.94878e-05	5.59311
8140_at	YOR386W	PHR1	2.8489	7.2884	4.1472	0.00098514	0.0065244	-1.27427
7545_at	YPR193C	HPA2	2.84326	6.7787	6.43144	1.56349e-05	0.000231985	2.96479
8379_at	YOR177C	MPC54	-2.83386	5.73833	-4.62138	0.000395115	0.0030711	-0.346703
7316_s_at	YBR048W	RPS11AorRPS11B	-2.833	9.51171	-8.93155	3.68882e-07	1.16335e-05	6.81788
7105_at	YBR240C	THI2	2.82408	3.49862	2.31215	0.0364837	0.11502	-4.82779
9105_at	YNL244C	SUI1	-2.81672	5.18064	-8.75894	4.66351e-07	1.40886e-05	6.57745
6576_at	YDL110C	NA	-2.81455	6.57079	-8.15023	1.09521e-06	2.71188e-05	5.70077
9595_at	YMR065W	KAR5	2.81371	7.12299	8.10722	1.16523e-06	2.84006e-05	5.63707
3168_f_at	NA	NA	2.81308	4.22924	5.85021	4.20196e-05	0.000506133	1.9479
10725_at	YKL148C	SDH1	2.81186	7.59135	5.7543	4.96887e-05	0.000578359	1.77565
9144_at	YNL295W	NA	-2.81138	6.2565	-5.80448	4.55087e-05	0.000540488	1.86593
3190_f_at	YHL048W	COS8	2.80431	9.84409	10.8572	3.31217e-08	1.74684e-06	9.27776
9113_at	YNL235C	NA	2.804	6.21786	9.07768	3.0324e-07	1.00026e-05	7.01869
11144_at	YJL103C	NA	2.79965	9.4177	6.67365	1.0499e-05	0.000169271	3.37471
4106_at	YIL019W	FAF1	2.79926	7.08998	6.17015	2.42435e-05	0.000327042	2.51343
5787_at	YEL048C	NA	-2.79311	5.1344	-9.88444	1.06997e-07	4.459e-06	8.08405
4921_i_at	YGR085C	NA	-2.79089	7.885	-6.37367	1.72132e-05	0.000251071	2.8658
4514_at	NA	NA	-2.77874	5.19149	-5.89432	3.89188e-05	0.000474291	2.02669
8476_at	YOR094W	ARF3	-2.77592	6.93219	-9.92122	1.02192e-07	4.356e-06	8.13094
8615_at	YOL083W	NA	2.77144	8.91234	9.15478	2.73707e-07	9.32502e-06	7.12365
4869_at	YGR124W	ASN2	2.77049	10.3575	11.7646	1.19387e-08	8.16878e-07	10.3105
7436_at	YBL060W	NA	2.77047	9.24638	6.14361	2.53617e-05	0.000339673	2.46704
6123_at	YDR337W	MRPS28	2.76889	6.95486	5.95789	3.48636e-05	0.000433358	2.1398
9096_at	YNL253W	TEX1	2.76614	6.26681	7.0843	5.44265e-06	9.96219e-05	4.05115
3015_at	NA	NA	-2.76315	5.47423	-4.48974	0.000507984	0.00379666	-0.602433
9014_at	YNL154C	YCK2	-2.75983	5.06562	-7.66067	2.24691e-06	4.93528e-05	4.96177
8402_at	YOR155C	ISN1	-2.75968	8.7042	-5.72977	5.18761e-05	0.000599074	1.73139
2782_at	NA	NA	2.75877	5.15216	5.72213	5.25776e-05	0.000604448	1.7176
2547_at	NA	NA	-2.75775	3.37503	-7.85413	1.68549e-06	3.83758e-05	5.25752
6317_at	YDR171W	HSP42	-2.75667	8.09948	-5.90899	3.79412e-05	0.000464866	2.05284
10805_at	YKL207W	NA	2.75553	8.33134	4.98357	0.000199996	0.00177132	0.348159
10393_at	YLL038C	ENT4	2.75538	7.22099	9.01843	3.28223e-07	1.06758e-05	6.93757
6104_at	YDR363W	ESC2	2.75312	7.83819	11.6024	1.42593e-08	9.30841e-07	10.1312
6392_at	YDR068W	DOS2	-2.74381	7.81039	-8.50525	6.62208e-07	1.85081e-05	6.2176
7886_at	YPL139C	UME1	-2.74376	7.86254	-4.98301	0.000200205	0.00177148	0.347095
7486_at	YBL100C	NA	2.74042	6.52149	9.38592	2.02074e-07	7.31148e-06	7.43426
4949_at	YGR068C	NA	-2.73822	10.8562	-8.21491	9.98179e-07	2.5487e-05	5.79611
4943_at	YGR062C	COX18	2.73252	8.17826	5.72931	5.19176e-05	0.000599074	1.73057
6283_at	YDR181C	SAS4	2.72819	8.04127	6.16798	2.4333e-05	0.000327776	2.50963
7758_at	YPR006C	ICL2	2.72146	6.42682	3.54667	0.00321807	0.0167934	-2.46441
5432_at	YFL048C	EMP47	2.71455	6.30689	4.90361	0.000232115	0.00201001	0.195952
2342_s_at	NA	NA	2.71122	9.26259	5.47741	8.11942e-05	0.000860003	1.27149
2783_g_at	NA	NA	2.70467	4.39175	7.73785	2.0023e-06	4.46097e-05	5.08035
8853_at	YNR005C	NA	2.69639	6.18662	8.69542	5.08801e-07	1.50305e-05	6.48807
4376_at	YHR171W	ATG7	-2.69631	10.1683	-5.50216	7.76737e-05	0.000829615	1.31697
6932_at	YCL044C	NA	2.69539	8.87593	6.60389	1.17652e-05	0.000183047	3.25749
4816_at	YGR206W	NA	-2.69514	4.65391	-5.40901	9.18147e-05	0.000948108	1.1454
11294_g_at	YAR031W	PRM8orPRM9	-2.69405	6.21174	-6.91426	7.12475e-06	0.000122938	3.77388
4342_at	YHR182W	NA	2.69063	9.70757	5.12594	0.00015372	0.00143786	0.617365
10087_at	YLR239C	LIP2	-2.68904	8.85408	-9.98096	9.48714e-08	4.08122e-06	8.20678
5028_at	YGL034C	NA	2.68498	5.23589	7.81901	1.77518e-06	4.01243e-05	5.2042
8836_at	YNR033W	ABZ1	-2.68407	8.36323	-5.29438	0.000112976	0.00111914	0.932775
6452_at	YDR037W	KRS1	-2.67823	8.38044	-3.75335	0.00213606	0.0120384	-2.05421
10540_at	YKR023W	NA	-2.67772	9.84763	-17.3341	7.30214e-11	2.06562e-08	15.341
8250_at	YOR314W	NA	2.67552	4.43887	11.1576	2.34507e-08	1.37681e-06	9.62792
9455_at	YMR185W	NA	-2.67525	4.54742	-4.00432	0.00130274	0.00821138	-1.55659
8662_at	YOL127W	RPL25	-2.67424	6.31518	-9.64762	1.4428e-07	5.74172e-06	7.77873
9447_at	YMR177W	MMT1	2.6714	7.20118	5.7966	4.61402e-05	0.000545904	1.85177
8600_at	YOL052C	SPE2	-2.66955	9.39041	-6.17845	2.39049e-05	0.000323409	2.52789
10175_at	YLR145W	RMP1	-2.66545	7.35736	-8.01772	1.32653e-06	3.16e-05	5.5038
8351_at	YOR194C	TOA1	-2.66179	5.185	-9.51699	1.70553e-07	6.57896e-06	7.60772
4986_at	YGR013W	SNU71	-2.6586	10.1665	-7.01735	6.04872e-06	0.000107552	3.94245
3013_at	NA	NA	-2.65637	5.30169	-4.14449	0.000990359	0.00655209	-1.27962
4032_f_at	YIR043C	NA	2.65523	9.79185	9.30011	2.26022e-07	7.93201e-06	7.31965
9333_at	YMR284W	YKU70	2.65499	9.62059	5.46163	8.35247e-05	0.000878044	1.24246
4722_s_at	YGR293C	NA	2.65436	7.4219	6.44309	1.53353e-05	0.000228683	2.9847
6427_at	YDR058C	TGL2	2.65233	9.66435	11.7061	1.27259e-08	8.60846e-07	10.2461
7796_at	YPL047W	SGF11	-2.65129	5.36437	-5.65499	5.9186e-05	0.000661678	1.596
9437_at	YMR210W	NA	-2.6484	8.49401	-4.23168	0.000835788	0.00567837	-1.10784
7731_at	YPR024W	YME1	-2.6448	6.43257	-4.38988	0.000615441	0.00447441	-0.797428
7668_at	YPR092W	NA	2.64369	5.90726	8.36778	8.03241e-07	2.15467e-05	6.01933
11057_at	YJL055W	NA	-2.64024	7.23337	-7.34209	3.64462e-06	7.23883e-05	4.46398
3014_at	NA	NA	-2.63838	4.0221	-5.51141	7.63993e-05	0.000817876	1.33394
8394_at	YOR147W	MDM32	2.63816	5.49584	6.39251	1.66808e-05	0.000244219	2.89814
6549_at	YDL049C	KNH1	2.63489	8.49124	6.47956	1.44363e-05	0.000217009	3.04688
5357_at	YFR015C	GSY1	-2.62873	6.64692	-3.79887	0.00195225	0.011208	-1.96387
9883_at	YLR436C	ECM30	2.62708	4.13611	2.78659	0.0145494	0.0568517	-3.95048
8582_at	YOL025W	LAG2	-2.62581	7.31809	-5.63235	6.16055e-05	0.000683002	1.55486
3045_s_at	NA	NA	2.62036	7.79221	4.66956	0.000360574	0.00285735	-0.253501
5110_at	YGL087C	MMS2	-2.61824	4.71011	-6.77778	8.86876e-06	0.000147051	3.54844
7457_at	YBL084C	CDC27	2.61715	5.99413	4.57564	0.000431074	0.00331567	-0.435398
5335_at	YFR036W	CDC26	-2.61343	4.58575	-6.02079	3.12849e-05	0.00039881	2.25117
7296_at	YBR073W	RDH54	-2.6068	8.40758	-4.77144	0.000297422	0.0024592	-0.0571617
4491_at	YHR063C	PAN5	-2.60404	6.67157	-4.03421	0.00122861	0.0078287	-1.49746
5253_g_at	YGL259W	YPS6orYPS5	2.60334	7.29457	8.77285	4.57568e-07	1.39133e-05	6.59695
7197_at	YBR151W	APD1	-2.60246	7.52631	-8.66327	5.31822e-07	1.53584e-05	6.44267
6345_at	YDR154C	CPR1	-2.60016	6.09714	-7.65715	2.25878e-06	4.94197e-05	4.95635
9951_at	YLR370C	ARC18	-2.59804	4.35366	-8.25174	9.47032e-07	2.4489e-05	5.85016
9694_at	YML060W	OGG1	2.59742	7.04487	8.89835	3.858e-07	1.2045e-05	6.7719
6198_at	YDR278C	NA	2.59278	5.14823	7.07224	5.54693e-06	0.000100898	4.03161
4543_at	YHL019C	APM2	-2.58965	8.85504	-5.01454	0.000188826	0.0016998	0.406923
8839_at	YNR036C	NA	-2.58697	6.20304	-8.49805	6.68896e-07	1.86392e-05	6.20729
10255_at	YLR091W	NA	2.58084	7.95702	5.47572	8.144e-05	0.000860003	1.26839
10498_at	YKR073C	NA	2.57974	6.75656	7.39393	3.36579e-06	6.77147e-05	4.54591
10197_at	YLR123C	NA	2.57806	4.3866	9.79267	1.2006e-07	4.90445e-06	7.96645
2818_at	NA	NA	2.57323	4.49418	2.69774	0.0173223	0.0646298	-4.11903
5017_at	YGR001C	NA	-2.57137	4.34605	-9.64619	1.44542e-07	5.74172e-06	7.77687
2784_s_at	NA	NA	2.57065	6.48124	7.10128	5.29931e-06	9.7765e-05	4.07863
8855_at	YNR007C	ATG3	2.56761	7.51825	5.0076	0.000191273	0.00171479	0.393757
3894_s_at	NA	NA	-2.56585	3.97964	-7.96313	1.43638e-06	3.369e-05	5.42199
10470_at	YKR091W	SRL3	-2.56383	4.68807	-6.91922	7.06864e-06	0.000122196	3.78202
4095_at	YIR014W	NA	2.56381	7.59825	4.76893	0.000298835	0.00246267	-0.0619948
9167_at	YNL317W	PFS2	2.56316	8.63573	4.31199	0.000715306	0.00500553	-0.950041
10341_at	YLL002W	RTT109	-2.56246	8.30397	-8.52982	6.39892e-07	1.79922e-05	6.2528
6490_at	YDL017W	CDC7	2.56169	10.4135	6.94527	6.78136e-06	0.000118104	3.82474
4558_at	YHL004W	MRP4	2.56132	7.30383	7.91447	1.54241e-06	3.56397e-05	5.34876
6933_at	YCL043C	PDI1	2.55916	9.72128	3.79923	0.00195084	0.0112068	-1.96314
10608_at	YKL044W	NA	2.5527	5.99278	6.48455	1.43178e-05	0.000215575	3.05536
10039_s_at	YLR280C	NA	-2.54967	7.80136	-6.74328	9.37713e-06	0.000153841	3.49105
7739_at	YPR031W	NA	-2.54959	9.9627	-4.01078	0.00128635	0.00813005	-1.54382
7588_at	YPR145W	ASN1	2.5495	8.04056	12.9736	3.37812e-09	3.07067e-07	11.5788
8972_at	YNL105W	NA	2.54652	4.58934	8.14444	1.10437e-06	2.71753e-05	5.69221
4570_at	YHL038C	CBP2	2.54085	7.35304	7.21978	4.40365e-06	8.44108e-05	4.26923
9162_at	YNL277W	MET2	-2.54029	9.74718	-8.68269	5.17784e-07	1.51602e-05	6.47012
4078_i_at	YIR043C	NA	2.5395	10.6441	7.48674	2.92131e-06	6.04666e-05	4.69168
6845_at	YCR060W	TAH1	-2.53868	4.52778	-6.3538	1.77939e-05	0.00025833	2.83166
9031_at	YNL183C	NPR1	2.53604	6.43183	2.80659	0.0139876	0.0552113	-3.91232
5980_at	YDR466W	PKH3	-2.53384	10.0878	-2.9057	0.0115027	0.0471096	-3.72217
10951_at	YJR067C	YAE1	-2.5302	4.63415	-7.07771	5.49937e-06	0.000100267	4.04048
9066_at	YNL193W	NA	2.52939	5.29484	7.01923	6.03075e-06	0.000107437	3.94551
7427_at	YBL070C	NA	2.52898	6.03294	6.75897	9.14219e-06	0.000150781	3.51718
5532_at	YER183C	FAU1	-2.52824	5.96999	-7.54498	2.67436e-06	5.61015e-05	4.78257
10296_at	YLR044C	PDC1	2.52783	7.73346	5.70271	5.44058e-05	0.000619364	1.68249
10123_at	YLR231C	BNA5	-2.52606	8.81201	-8.34434	8.30296e-07	2.21452e-05	5.98531
8858_at	YNR010W	CSE2	-2.52086	3.56889	-11.0785	2.56638e-08	1.46976e-06	9.53653
7684_at	YPR064W	NA	2.5201	6.07124	9.47122	1.80921e-07	6.89348e-06	7.54737
10032_at	YLR274W	CDC46	-2.5194	7.02176	-3.07373	0.00824447	0.0361834	-3.39633
8632_at	YOL065C	INP54	-2.51481	9.30545	-8.63294	5.54563e-07	1.58799e-05	6.3997
8559_at	YOL003C	NA	2.51194	8.1504	6.17999	2.38422e-05	0.000323409	2.53059
10162_at	YLR181C	VTA1	-2.50872	7.50999	-8.93454	3.67397e-07	1.16259e-05	6.82201
7806_at	YPL037C	EGD1	-2.50829	7.73946	-9.99248	9.35246e-08	4.04191e-06	8.22137
9348_at	YMR297W	PRC1	2.50695	8.58087	4.39618	0.000608008	0.00443072	-0.785089
9502_at	YMR147W	NA	2.50662	7.50339	6.72531	9.65409e-06	0.000158107	3.46109
8661_at	YOL128C	YGK3	-2.50343	9.48862	-7.28702	3.96774e-06	7.72637e-05	4.37654
3052_at	NA	NA	2.50272	6.38633	5.90332	3.83157e-05	0.000468777	2.04274
6596_at	YDL132W	CDC53	2.50212	4.76387	4.35828	0.000654107	0.00467899	-0.859289
11135_at	YJL112W	MDV1	2.49507	8.45414	4.08723	0.0011075	0.0071895	-1.39264
9585_at	YMR055C	BUB2	2.48788	7.85243	6.97354	6.48346e-06	0.000114194	3.87099
6426_at	YDR057W	YOS9	2.48266	7.35844	6.08969	2.78027e-05	0.000364887	2.37252
9775_at	YML112W	CTK3	-2.48081	8.83718	-4.48067	0.000516898	0.00384175	-0.62012
7153_at	YBR197C	NA	-2.47999	6.58699	-7.44976	3.09051e-06	6.2991e-05	4.63373
6019_at	YDR460W	TFB3	-2.47674	9.20463	-9.39798	1.98933e-07	7.25404e-06	7.45029
7377_at	YBL028C	NA	-2.47432	5.76017	-6.95898	6.63507e-06	0.000115989	3.84719
10654_at	YKL085W	MDH1	2.47202	9.2216	7.21184	4.45835e-06	8.52842e-05	4.25653
4213_at	YIL098C	FMC1	-2.46984	5.91131	-4.35417	0.000659315	0.00470903	-0.867339
10915_at	YJR122W	CAF17	2.46954	4.78629	5.17586	0.000140256	0.00134148	0.711209
10092_at	YLR244C	MAP1	-2.46787	7.12717	-6.98613	6.35522e-06	0.000112573	3.89156
5324_at	YFR027W	ECO1	-2.46499	6.51447	-5.34553	0.000102968	0.00103578	1.02785
3893_s_at	NA	NA	-2.46343	4.45267	-6.55325	1.27845e-05	0.000196611	3.17196
10268_at	YLR059C	REX2	2.46132	7.01703	5.66723	5.79199e-05	0.000649859	1.61821
5359_at	YFR017C	NA	-2.45622	5.21691	-7.14685	4.93406e-06	9.21189e-05	4.15215
8936_at	YNL096C	RPS7B	-2.45455	6.2532	-6.03122	3.07299e-05	0.000394043	2.26957
7445_at	YBL095W	NA	2.45413	8.49852	11.0281	2.71884e-08	1.5018e-06	9.47802
8243_at	YOR308C	SNU66	-2.45403	9.99763	-6.23693	2.16532e-05	0.000300345	2.62967
10171_at	YLR141W	RRN5	2.45398	8.71488	5.60476	6.4695e-05	0.00071134	1.50462
8631_at	YOL066C	RIB2	-2.44961	10.7208	-10.8501	3.3397e-08	1.75147e-06	9.26936
8856_at	YNR008W	LRO1	2.44662	7.66541	2.91679	0.0112533	0.0464001	-3.7008
10737_at	YKL181W	PRS1	-2.4443	10.0452	-10.1447	7.75206e-08	3.51289e-06	8.41275
6461_at	YDL001W	RMD1	-2.44305	8.79765	-9.36896	2.06586e-07	7.44586e-06	7.41167
4406_at	YHR113W	NA	-2.44026	7.70541	-5.58807	6.66417e-05	0.000728455	1.47419
10744_at	YKL175W	ZRT3	2.43917	9.27311	3.52747	0.00334325	0.0173192	-2.50249
8346_at	YOR190W	SPR1	2.43744	9.34307	7.65144	2.2782e-06	4.95734e-05	4.94754
10051_at	YLR291C	GCD7	-2.4365	8.93658	-4.82731	0.000267762	0.00225389	0.0500526
7993_at	YPL256C	CLN2	2.43389	9.68118	7.01232	6.09702e-06	0.000108205	3.93426
8648_at	YOL095C	HMI1	2.43334	7.09746	4.3323	0.00068776	0.00484913	-0.910203
4447_at	YHR066W	SSF1	-2.43132	4.36589	-4.36796	0.000642005	0.00461719	-0.840332
11091_at	YJL066C	MPM1	2.42924	7.28796	7.98351	1.39428e-06	3.29509e-05	5.45258
2319_f_at	NA	NA	2.42877	4.16772	2.5935	0.0212322	0.0758242	-4.31456
10974_at	YJR045C	SSC1	-2.42759	7.48705	-6.67081	1.05476e-05	0.000169499	3.36996
8146_at	YOR392W	NA	2.42758	6.15923	5.13078	0.000152357	0.0014294	0.626484
8222_at	YOR332W	VMA4	-2.42293	7.61395	-8.66186	5.32859e-07	1.53584e-05	6.44067
8552_at	YOL010W	RCL1	-2.42269	6.02248	-5.98488	3.32781e-05	0.000420108	2.18766
11133_at	YJL116C	NCA3	2.41716	6.8619	5.05847	0.000174081	0.00158541	0.490083
8167_at	YOR368W	RAD17	-2.41618	7.26292	-7.33917	3.66108e-06	7.25609e-05	4.45934
10105_at	YLR213C	CRR1	2.41609	7.30072	10.2798	6.57402e-08	3.05316e-06	8.5807
8981_at	YNL096C	RPS7B	-2.41557	5.9561	-7.13481	5.02791e-06	9.31261e-05	4.13275
7253_g_at	YBR116C	TKL2	2.41118	9.84813	5.13906	0.000150056	0.00141636	0.642058
10395_at	YLL036C	PRP19	-2.40864	9.4438	-7.56705	2.58665e-06	5.43837e-05	4.81689
10613_at	YKL039W	PTM1	2.39925	8.80531	2.78271	0.0146608	0.0571434	-3.95786
8681_at	YOL107W	NA	2.39826	6.04852	10.1466	7.73388e-08	3.51289e-06	8.41514
5707_at	YER007C-A	NA	-2.39596	7.54299	-7.96812	1.42594e-06	3.35294e-05	5.4295
10019_at	YLR304C	ACO1	2.39487	7.15818	3.04744	0.00868635	0.0376449	-3.44757
2277_at	NA	NA	2.39362	4.16209	5.64055	6.07182e-05	0.000674767	1.56976
6883_at	YCR005C	CIT2	2.3936	9.20496	5.78023	4.74814e-05	0.000558236	1.82233
AFFX-YEL018w/_at	NA	NA	-2.39188	8.28223	-6.65524	1.08186e-05	0.000171755	3.34384
8145_s_at	YOR390W	NA	2.39172	7.29201	5.37738	9.72041e-05	0.000989532	1.0869
5141_at	YGL148W	ARO2	-2.39049	10.0145	-9.22178	2.50518e-07	8.62948e-06	7.21431
5553_at	YER159C	BUR6	-2.38935	4.26988	-7.46964	2.99828e-06	6.1245e-05	4.66491
5489_at	NA	NA	-2.38526	4.27005	-8.65188	5.40248e-07	1.55176e-05	6.42654
7780_at	YPL018W	CTF19	2.38346	8.19181	6.34243	1.81356e-05	0.000261258	2.81209
10200_at	YLR126C	NA	-2.3823	7.78969	-7.09132	5.38296e-06	9.89171e-05	4.0625
9957_at	YLR376C	PSY3	-2.38109	5.58265	-7.23301	4.31408e-06	8.3035e-05	4.29039
9445_at	YMR175W	SIP18	-2.38055	4.17572	-8.29416	8.9154e-07	2.33124e-05	5.9122
2199_at	NA	NA	2.37829	5.71567	2.61864	0.0202178	0.0728679	-4.26765
11028_at	YJR006W	HYS2	-2.37825	6.59887	-5.18287	0.000138467	0.0013312	0.72435
7277_at	YBR096W	NA	2.37676	5.3049	5.96024	3.47225e-05	0.000432826	2.14398
10600_at	YKL007W	CAP1	-2.37463	8.53559	-6.48581	1.42879e-05	0.000215472	3.05752
8636_at	YOL061W	PRS5	2.37282	10.0058	5.89844	3.86417e-05	0.00047153	2.03404
7094_at	YBR276C	PPS1	2.37057	8.74118	5.10834	0.000158781	0.00147338	0.584215
4867_at	YGR122W	NA	-2.36943	8.14751	-7.6355	2.33335e-06	5.05166e-05	4.92293
8606_at	YOL046C	NA	2.36854	9.11566	5.86628	4.08608e-05	0.000494088	1.97664
4833_at	YGR178C	PBP1	2.36779	7.61181	2.97305	0.0100673	0.0423324	-3.59206
5703_at	YER004W	NA	2.36675	8.02806	6.18863	2.34958e-05	0.000320195	2.54565
7133_at	YBR223C	TDP1	2.36451	11.4957	10.0694	8.5036e-08	3.79045e-06	8.31841
4914_at	YGR078C	PAC10	-2.36294	8.6058	-5.00046	0.000193824	0.00173309	0.380211
4143_at	YIL028W	NA	2.36244	5.33514	5.49984	7.79974e-05	0.00083117	1.3127
9534_at	YMR092C	AIP1	-2.3615	10.8304	-6.70698	9.94535e-06	0.000162024	3.43048
11149_at	YJL144W	NA	-2.35969	6.64744	-7.16248	4.81496e-06	9.04379e-05	4.17731
2811_at	NA	NA	2.35876	4.43108	4.28576	0.000752567	0.00521545	-1.00154
9112_at	NA	NA	2.35808	4.4846	7.68063	2.18076e-06	4.81263e-05	4.99252
4167_at	YIL050W	PCL7	2.3548	7.00295	5.62635	6.22649e-05	0.000689493	1.54393
8819_at	YNR060W	FRE4	2.35213	8.7393	3.29804	0.00527728	0.0252503	-2.95628
9415_at	YMR231W	PEP5	2.35131	5.66742	3.11394	0.0076115	0.0340131	-3.31782
6285_at	YDR183W	PLP1	2.35112	5.64124	5.03862	0.000180591	0.00163672	0.452527
4139_at	YIL032C	NA	-2.34899	6.67927	-8.05922	1.24898e-06	3.02024e-05	5.56572
5578_at	YER137C	NA	-2.34878	6.82086	-7.34922	3.60487e-06	7.17793e-05	4.47527
8869_at	YNL026W	SAM50	2.34614	8.94165	3.81785	0.00188042	0.0108557	-1.9262
10278_at	YLR069C	MEF1	2.34607	8.22176	4.05814	0.00117235	0.0075371	-1.45013
5530_at	YER181C	NA	2.34286	4.32983	5.88194	3.97637e-05	0.000482308	2.00462
10201_at	YLR127C	APC2	2.34223	4.93796	2.75614	0.0154472	0.0594146	-4.00843
6922_at	YCL055W	KAR4	-2.34002	6.69911	-4.03242	0.00123291	0.00784542	-1.50099
4518_at	YHR001W-A	QCR10	-2.33946	4.2728	-6.40991	1.62046e-05	0.000238725	2.92795
7870_at	YPL110C	NA	2.33934	6.93786	2.10894	0.0534243	0.152233	-5.18208
11089_at	YJL068C	NA	-2.33358	8.91961	-7.62071	2.38577e-06	5.1316e-05	4.90007
7662_at	YPR086W	SUA7	-2.33214	7.74666	-8.76314	4.6368e-07	1.40534e-05	6.58334
4971_at	YGR045C	NA	-2.33133	6.50806	-4.7869	0.00028889	0.00240142	-0.027464
4565_at	YHL043W	ECM34	2.33032	6.18385	6.20784	2.27441e-05	0.00031269	2.5791
10349_at	YLR007W	NSE1	-2.32838	8.89134	-6.47379	1.45749e-05	0.00021874	3.03705
8028_at	YPL267W	NA	-2.32824	5.52882	-6.59365	1.19643e-05	0.000185835	3.24021
4824_at	YGR169C	PUS6	2.32779	9.82361	7.22976	4.33592e-06	8.32835e-05	4.28519
4225_at	YIL131C	FKH1	2.32622	7.74636	4.07263	0.00113958	0.00737721	-1.42149
10446_s_at	YKL199C	PTK1	-2.32597	5.8883	-4.63507	0.00038497	0.00301737	-0.320206
11099_at	YJL058C	BIT61	2.32202	5.27673	6.80806	8.44637e-06	0.000141556	3.59868
4241_at	YIL160C	POT1	-2.3215	7.47316	-5.11388	0.00015717	0.00146133	0.594653
8005_at	YPL245W	NA	2.31894	8.10172	7.02393	5.98609e-06	0.000106845	3.95316
8656_at	YOL087C	NA	2.31338	6.15654	2.17697	0.0470705	0.138438	-5.06523
10800_at	YKL212W	SAC1	2.31176	8.44868	4.29515	0.000738997	0.00514325	-0.983087
6494_at	YDL013W	HEX3	-2.30773	8.90062	-4.8741	0.000245281	0.00210451	0.139594
9962_at	YLR381W	CTF3	2.30704	6.0873	3.25136	0.005791	0.0273163	-3.04821
5127_at	YGL115W	SNF4	-2.30434	6.60432	-6.03639	3.04584e-05	0.000392178	2.2787
5749_at	YEL041W	NA	2.30196	9.58805	6.74574	9.33992e-06	0.0001535	3.49515
10275_at	YLR066W	SPC3	2.30082	6.86866	8.28239	9.06585e-07	2.35083e-05	5.895
11205_i_at	YJL177W	RPL17B	-2.30031	8.8323	-6.92724	6.97886e-06	0.000120868	3.79518
8144_g_at	YOR389W	NA	2.2996	7.00633	3.96461	0.00140837	0.00866655	-1.63523
2613_s_at	NA	NA	2.29686	4.26574	3.27283	0.00554885	0.0263204	-3.00596
6187_at	YDR267C	NA	2.29362	8.26137	5.25825	0.000120652	0.00118806	0.865419
10962_at	YJR078W	BNA2	2.29165	6.59964	3.19652	0.00645872	0.0298181	-3.15601
10742_at	YKL177W	NA	2.29068	7.80002	6.33355	1.84071e-05	0.000263544	2.79679
5080_at	YGL072C	NA	-2.29002	6.90696	-9.60702	1.51951e-07	5.92871e-06	7.72578
9645_at	YML019W	OST6	2.28804	7.65226	4.97513	0.000203158	0.00179591	0.332125
4104_at	YIL021W	RPB3	2.28458	7.74701	5.58978	6.64394e-05	0.000727095	1.47731
5584_at	YER144C	UBP5	-2.28236	6.47473	-4.19202	0.000902775	0.00604548	-1.18591
6535_at	YDL063C	NA	2.28	7.33402	3.89158	0.00162594	0.00971711	-1.77994
4793_at	YGR227W	DIE2	-2.27927	8.12031	-2.64567	0.0191792	0.0699913	-4.21702
8694_at	YOL140W	ARG8	2.27917	7.1793	5.78662	4.69526e-05	0.000554813	1.83384
10933_at	YJR094W-A	RPL43B	-2.27894	7.49251	-5.43263	8.79918e-05	0.000914047	1.18901
2546_at	NA	NA	-2.27797	3.92592	-8.32202	8.56969e-07	2.26623e-05	5.95282
9641_at	YMR019W	STB4	2.27666	8.48958	4.09699	0.00108657	0.00708319	-1.37336
9863_at	YLR459W	GAB1	2.27148	7.57026	3.98088	0.00136408	0.00849912	-1.60301
9427_at	YMR200W	ROT1	2.26469	7.02498	4.84578	0.000258641	0.00219209	0.0854351
4603_at	NA	NA	-2.26424	7.67668	-3.82051	0.00187057	0.0108126	-1.92092
5604_at	YER119C-A	NA	-2.25783	4.14236	-6.60778	1.16905e-05	0.000182493	3.26404
9183_s_at	YNL301C	RPL18BorRPL18A	2.2578	10.2248	8.2838	9.04772e-07	2.35083e-05	5.89706
7297_at	YBR074W	NA	2.25607	7.96742	3.85044	0.00176331	0.010333	-1.86155
4767_at	YGR247W	CPD1	2.25481	6.80183	6.79487	8.62761e-06	0.000143819	3.57682
7302_at	YBR078W	ECM33	2.25441	10.205	4.35448	0.000658913	0.00470903	-0.86672
5811_at	YEL073C	NA	-2.25426	5.358	-6.6417	1.10601e-05	0.000174697	3.32111
5157_at	YGL131C	SNT2	2.25295	5.67371	2.53877	0.0236136	0.0819759	-4.41618
6795_at	YCR100C	NA	2.24459	7.74259	6.7553	9.19663e-06	0.000151412	3.51106
6002_at	YDR488C	PAC11	2.24302	10.3171	5.13437	0.000151355	0.00142429	0.633241
8281_at	YOR260W	GCD1	2.23658	7.46696	3.71373	0.00231028	0.0128105	-2.13286
8338_at	YOR226C	ISU2	2.2348	6.98791	6.25479	2.10107e-05	0.00029494	2.66066
9589_at	YMR059W	SEN15	-2.23266	5.54131	-5.02148	0.000186413	0.00168132	0.420074
9364_at	YMR270C	RRN9	2.23048	7.49889	10.0119	9.13036e-08	3.9828e-06	8.24589
10327_at	YLR030W	NA	-2.22948	5.95323	-7.47307	2.98266e-06	6.10595e-05	4.67029
10353_at	YLL033W	NA	2.2246	4.79076	5.94872	3.54202e-05	0.00043969	2.12352
4838_at	YGR183C	QCR9	2.22231	6.65092	5.2462	0.000123332	0.00120935	0.842911
11348_at	YAL019W	FUN30	-2.21603	6.94169	-3.01854	0.00919897	0.0392979	-3.50378
8638_at	YOL105C	WSC3	-2.21397	5.29897	-6.95157	6.7137e-06	0.000117145	3.83506
10211_at	YLR137W	NA	2.21275	10.7223	9.17726	2.65683e-07	9.1182e-06	7.15413
7753_at	YPR001W	CIT3	2.2124	8.18273	6.88582	7.45582e-06	0.000127629	3.72711
6597_at	YDL131W	LYS21	-2.21019	9.49824	-4.27107	0.000774297	0.0053265	-1.0304
9942_at	YLR363C	NMD4	-2.20982	5.64128	-8.38859	7.79986e-07	2.12279e-05	6.04951
4740_at	YGR264C	MES1	2.20523	9.32315	5.51477	7.59423e-05	0.000813917	1.3401
8639_at	YOL104C	NDJ1	2.20516	6.4723	4.76845	0.000299103	0.00246267	-0.0629113
10056_at	YLR254C	NDL1	-2.20149	6.96694	-5.43241	8.80266e-05	0.000914047	1.18861
7343_at	YBR030W	NA	-2.19999	8.65311	-4.37902	0.000628447	0.00454068	-0.818663
10877_at	YJR129C	NA	-2.19774	10.593	-5.55178	7.10872e-05	0.000772525	1.4079
4716_at	YGR286C	BIO2	2.19413	7.74521	4.18555	0.000914216	0.00611333	-1.19866
8960_at	YNL116W	DMA2	-2.18762	7.52918	-5.03106	0.000183137	0.00165818	0.438213
4920_at	YGR084C	MRP13	2.18677	6.06645	5.94275	3.57877e-05	0.000443075	2.11291
9970_at	YLR346C	NA	-2.1843	5.38826	-6.44642	1.5251e-05	0.000227789	2.99037
7259_at	YBR123C	TFC1	-2.18109	10.0254	-4.50696	0.000491508	0.0036972	-0.5689
9430_at	YMR203W	TOM40	2.17966	9.12432	8.00434	1.3526e-06	3.21286e-05	5.48379
2612_g_at	NA	NA	2.17921	4.45351	3.96103	0.00141831	0.00871046	-1.64231
5547_at	YER153C	PET122	-2.17558	7.76553	-6.43021	1.56668e-05	0.000231985	2.96269
5810_s_at	YEL074W	NA	2.17278	5.26689	6.53912	1.30851e-05	0.000199918	3.14803
9120_at	YNL274C	NA	-2.17176	10.5551	-10.3699	5.89526e-08	2.77941e-06	8.69166
2942_at	NA	NA	-2.17065	5.81591	-9.43731	1.89036e-07	7.03047e-06	7.50249
10218_at	YLR099C	ICT1	2.17045	9.66232	6.9397	6.84175e-06	0.000118713	3.81561
5103_at	YGL094C	PAN2	2.17026	5.99545	2.69581	0.0173879	0.0647708	-4.12267
8253_at	YOR277C	NA	2.16581	6.53393	7.32008	3.77031e-06	7.44098e-05	4.42908
10079_at	YLR232W	NA	-2.16572	8.45753	-5.9469	3.5532e-05	0.000440493	2.12028
4911_at	YGR075C	PRP38	-2.16441	6.17283	-5.62065	6.28963e-05	0.000694837	1.53357
5722_at	YER021W	RPN3	2.16214	4.44525	3.43092	0.0040509	0.0203636	-2.69376
9498_f_at	YMR143W	RPS16AorRPS16B	-2.16139	6.9696	-5.69773	5.48852e-05	0.000622544	1.67348
6863_at	YCR028C-A	RIM1	-2.15964	5.06835	-4.91329	0.000227959	0.00197769	0.21441
6336_at	YDR145W	TAF12	-2.15911	5.26041	-5.92592	3.68449e-05	0.000453756	2.08298
7156_at	YBR200W	BEM1	2.15622	8.61992	4.48702	0.000510641	0.00381042	-0.607737
5556_at	YER163C	NA	-2.15527	8.27979	-4.20586	0.000878797	0.00592743	-1.15866
7665_at	YPR089W	NA	-2.15363	5.79363	-6.88505	7.46499e-06	0.000127629	3.72585
9357_at	YMR263W	SAP30	-2.15061	5.12487	-12.0257	9.00926e-09	6.57042e-07	10.5943
4359_at	YHR154W	RTT107	-2.15052	4.86763	-2.2843	0.0384627	0.119814	-4.87726
5785_at	YEL050C	RML2	2.149	8.13611	7.2672	4.0913e-06	7.92371e-05	4.34497
10502_at	YKR077W	NA	2.14861	6.92504	6.42197	1.58827e-05	0.000234597	2.9486
5354_at	YFR012W	NA	2.14771	7.08648	6.24443	2.13808e-05	0.000297452	2.6427
9349_at	YMR255W	GFD1	-2.14682	4.76021	-4.98377	0.000199921	0.00177132	0.348543
6554_at	YDL087C	LUC7	2.14576	6.77265	4.31937	0.000705169	0.00494572	-0.935563
8849_at	YNR001C	CIT1	2.14478	7.45824	3.96909	0.00139603	0.00862242	-1.62635
7098_at	YBR280C	NA	-2.13935	9.56445	-4.21022	0.000871383	0.00589019	-1.15008
5682_at	YER027C	GAL83	2.13662	6.4236	5.71332	5.3399e-05	0.000611632	1.70167
7348_at	YBR034C	HMT1	2.13557	9.72103	7.03975	5.83839e-06	0.000105215	3.97889
6617_at	YDL114W	NA	2.13485	7.49308	5.02792	0.000184205	0.00166462	0.432265
10306_at	YLR010C	TEN1	-2.13266	4.65159	-6.07387	2.85645e-05	0.000369833	2.34472
5732_at	YEL015W	EDC3	2.13182	9.26639	4.38196	0.000624907	0.00452912	-0.812927
10276_at	YLR067C	PET309	2.13046	5.20304	2.69938	0.0172667	0.0644663	-4.11594
9122_at	YNL272C	SEC2	2.12677	8.07763	3.27835	0.00548812	0.0261093	-2.99507
7444_at	YBL096C	NA	2.1261	8.15119	8.93629	3.66528e-07	1.16259e-05	6.82444
4770_at	YGR250C	NA	-2.12512	8.34413	-2.81477	0.0137641	0.0545134	-3.89669
5691_at	YER036C	NA	-2.1249	10.576	-5.08139	0.000166866	0.00153771	0.533391
6495_at	YDL012C	NA	-2.12395	7.49162	-5.47346	8.17711e-05	0.000862523	1.26423
10911_at	YJR118C	ILM1	2.12284	4.79451	8.30773	8.74521e-07	2.29962e-05	5.932
7382_at	YBL025W	RRN10	-2.11946	7.94654	-6.29879	1.95117e-05	0.000276811	2.73683
8011_at	YPL239W	YAR1	-2.11737	8.47659	-5.96031	3.47186e-05	0.000432826	2.14409
8614_at	YOL038W	PRE6	-2.1163	7.74725	-6.25239	2.10958e-05	0.000295459	2.65651
5684_at	YER029C	SMB1	-2.11331	5.08001	-6.26619	2.06112e-05	0.000289767	2.68042
5313_s_at	NA	NA	2.11316	6.83296	6.11203	2.67626e-05	0.000354549	2.41173
9432_at	YMR205C	PFK2	-2.11241	6.03973	-2.99355	0.00966637	0.0409046	-3.55231
11206_f_at	YJL177W	RPL17AorRPL17B	-2.11226	8.08996	-7.14416	4.95486e-06	9.23227e-05	4.14782
5059_at	YGL048C	RPT6	2.11159	8.365	7.61045	2.42285e-06	5.19937e-05	4.8842
6628_at	YDL147W	RPN5	-2.11052	6.46943	-3.53112	0.00331906	0.0172322	-2.49524
7099_at	YBR281C	NA	2.10579	8.86866	3.04287	0.00876548	0.0379171	-3.45647
9701_at	YML055W	SPC2	2.10393	4.56738	7.42738	3.19788e-06	6.48961e-05	4.59858
6193_at	YDR273W	DON1	-2.09998	8.60057	-5.31759	0.000108314	0.00107909	0.975965
4038_at	NA	NA	2.09971	6.57796	2.74977	0.0156416	0.0599157	-4.02052
7813_at	YPL077C	NA	-2.09906	5.58805	-4.55463	0.000448703	0.00343331	-0.476196
8409_at	YOR162C	YRR1	2.09893	7.20386	2.1528	0.0492423	0.143583	-5.10695
5098_at	YGL099W	LSG1	2.09499	7.83021	5.16882	0.000142079	0.00135614	0.697986
4897_at	YGR107W	NA	2.09319	6.50446	6.45229	1.51033e-05	0.000225944	3.00039
10008_at	YLR338W	NA	2.09284	6.01803	5.82474	4.39275e-05	0.000524447	1.90227
3039_s_at	NA	NA	2.09162	7.15349	4.71732	0.000329404	0.00265772	-0.161332
4091_at	YIR010W	DSN1	-2.09133	7.41008	-3.6726	0.00250643	0.0137714	-2.21452
7585_at	YPR142C	NA	2.08589	8.51324	5.498	7.82551e-05	0.000831468	1.30932
6666_at	YDL197C	ASF2	-2.08494	9.28319	-4.28523	0.000753326	0.00521684	-1.00256
11002_at	YJR024C	NA	-2.08246	9.15569	-6.50516	1.38384e-05	0.000210051	3.09042
10793_at	YKL219W	COS9	2.08156	6.23742	6.63565	1.11699e-05	0.000175836	3.31094
10217_at	YLR098C	CHA4	2.08137	7.00008	3.82131	0.00186761	0.0108085	-1.91933
10942_at	YJR103W	URA8	2.08083	10.7296	5.27725	0.000116551	0.00115133	0.900849
8230_at	NA	NA	-2.08073	8.0539	-6.18921	2.34725e-05	0.000320195	2.54667
9420_i_at	YMR194W	RPL36A	-2.08043	10.5806	-5.97638	3.37697e-05	0.000424254	2.17258
8722_at	YOL159C	NA	2.07977	6.68292	5.89076	3.916e-05	0.000475988	2.02034
4931_at	YGR095C	RRP46	-2.07787	9.2985	-5.18024	0.000139136	0.0013335	0.719419
6297_at	YDR195W	REF2	2.07717	7.70004	4.72305	0.000325854	0.00263592	-0.150285
8239_at	YOR304C-A	NA	-2.07713	4.5258	-6.94318	6.80388e-06	0.000118276	3.82132
7670_at	YPR094W	RDS3	-2.07699	5.41143	-7.91462	1.54208e-06	3.56397e-05	5.34898
10499_at	YKR074W	NA	-2.07679	6.52788	-7.34897	3.60627e-06	7.17793e-05	4.47487
8473_at	YOR091W	NA	-2.07617	10.9636	-5.27889	0.000116203	0.0011491	0.903915
10177_at	YLR147C	SMD3	-2.07271	5.87361	-6.17924	2.38729e-05	0.000323409	2.52927
10064_s_at	YLR261C	YPT6	-2.07098	5.19517	-6.0281	3.08948e-05	0.000395072	2.26407
10061_at	YLR259C	HSP60	-2.06967	9.91304	-3.99736	0.00132066	0.00830195	-1.57038
7586_at	YPR143W	RRP15	2.06765	6.45399	2.61322	0.0204324	0.0735017	-4.27777
11323_at	YAL001C	TFC3	-2.06678	4.44054	-7.60703	2.43533e-06	5.20225e-05	4.87891
9130_at	YNL264C	PDR17	-2.06665	8.28709	-5.7816	4.73674e-05	0.000557598	1.8248
7754_at	YPR002W	PDH1	2.06611	8.68523	5.20324	0.000133398	0.00129177	0.762546
9537_at	YMR095C	SNO1	-2.05808	9.20957	-6.8369	8.06366e-06	0.000135968	3.64642
5252_at	YGL259W	YPS5	2.05512	7.70282	5.83968	4.2798e-05	0.000514182	1.92904
11338_at	YAL029C	MYO4	-2.05471	6.08325	-7.16459	4.79911e-06	9.03379e-05	4.1807
10000_at	YLR331C	NA	-2.05459	6.95782	-5.68054	5.65743e-05	0.000637058	1.64235
10192_at	YLR119W	SRN2	-2.04977	6.67329	-5.99088	3.29364e-05	0.000417179	2.19827
8517_at	YOR044W	NA	2.04975	6.98315	6.11089	2.6815e-05	0.000354557	2.40973
5062_at	YGL045W	RIM8	-2.04793	6.57846	-3.98601	0.00135041	0.00844346	-1.59285
9894_at	YLR445W	NA	-2.04789	4.87588	-7.0971	5.33427e-06	9.82158e-05	4.07186
4901_at	YGR111W	NA	2.04665	9.19919	10.0037	9.22332e-08	4.00464e-06	8.23555
7326_at	YBR058C	UBP14	2.04396	6.47691	2.4368	0.028751	0.0954108	-4.60331
6233_at	YDR222W	NA	2.04339	8.16301	3.64186	0.00266394	0.0143995	-2.27553
4096_at	YIR015W	RPR2	-2.04114	5.22745	-4.67511	0.000356801	0.00283226	-0.242778
5353_at	YFR011C	NA	-2.04093	4.01661	-6.84782	7.92359e-06	0.000134485	3.66446
6484_at	YDL023C	NA	2.04023	8.34076	5.89146	3.91119e-05	0.000475988	2.02161
7403_at	YBL049W	MOH1	-2.03181	7.90839	-5.66618	5.80275e-05	0.000650284	1.6163
7413_at	YBL039C	URA7	-2.03072	6.82093	-3.28521	0.00541373	0.025837	-2.98156
8381_at	YOR179C	SYC1	-2.02921	6.35234	-6.24775	2.12616e-05	0.000297121	2.64845
7425_s_at	YBL072C	RPS8BorRPS8A	-2.02861	7.30216	-4.72977	0.000321749	0.00261403	-0.137354
9548_at	YMR106C	YKU80	2.0285	9.09465	5.4758	8.14288e-05	0.000860003	1.26853
6633_at	YDL142C	CRD1	2.02841	6.45607	5.26316	0.000119578	0.00117998	0.874575
6577_at	YDL109C	NA	2.0284	11.4369	5.54569	7.18636e-05	0.000778244	1.39675
10390_at	YLL041C	SDH2	2.02795	9.50273	6.14792	2.51765e-05	0.000338649	2.47458
9503_at	YMR148W	NA	2.02692	7.14635	5.43383	8.78017e-05	0.000913923	1.19123
6301_at	YDR155C	CPR1	2.01452	7.34155	5.10769	0.000158969	0.00147366	0.583
11368_at	YAL041W	CDC24	2.01428	5.52566	2.75833	0.0153809	0.0591843	-4.00427
8359_at	YOR202W	HIS3	-2.01327	6.58239	-4.88607	0.000239852	0.00206171	0.162457
7113_at	YBR248C	HIS7	2.01311	8.66178	5.37634	9.73877e-05	0.000990321	1.08497
9512_at	YMR116C	ASC1	2.01202	8.06377	3.87499	0.00167997	0.0099558	-1.81284
8607_at	YOL045W	PSK2	2.01123	6.59594	2.61715	0.0202765	0.0730252	-4.27043
9870_s_at	YLR312W-A	MRPL15	-2.01015	7.70863	-5.33451	0.000105043	0.00105212	1.0074
10906_at	YJR113C	RSM7	2.00889	7.28287	6.09534	2.75355e-05	0.000362545	2.38245
6839_at	YCR051W	NA	2.00681	6.02192	5.07043	0.000170277	0.00156604	0.51269
6252_at	YDR241W	NA	-2.00536	4.0289	-3.55821	0.00314511	0.0164664	-2.44151
9027_at	YNL141W	AAH1	-2.00288	5.7421	-3.096	0.00788768	0.0348964	-3.35286
8485_at	YOR057W	SGT1	-2.00186	7.60806	-5.78451	4.71266e-05	0.000556166	1.83004
5087_at	YGL065C	ALG2	2.00095	9.71825	4.19696	0.000894149	0.00600063	-1.17619
8365_at	YOR208W	PTP2	1.99683	5.76085	3.05468	0.00856226	0.0372454	-3.43345
10241_at	YLR077W	NA	1.99333	9.50054	3.90111	0.00159572	0.00959798	-1.76106
5976_at	YDR507C	GIN4	1.99228	5.45342	2.13085	0.0512959	0.147884	-5.14465
10675_at	YKL109W	HAP4	-1.99188	6.14269	-3.68676	0.00243709	0.0134219	-2.18641
5583_at	YER143W	DDI1	-1.99145	8.90043	-5.74978	5.00844e-05	0.000582239	1.7675
9893_at	YLR444C	NA	1.99109	6.283	6.91097	7.16227e-06	0.000123358	3.76847
8699_at	YOL135C	MED7	-1.99109	6.90892	-4.43859	0.000560377	0.00411575	-0.702216
5406_at	YFL024C	EPL1	-1.99036	7.73617	-3.31585	0.00509341	0.024623	-2.92115
7115_at	YBR250W	NA	1.98833	8.29263	4.65965	0.000367418	0.00290173	-0.272662
6747_at	NA	NA	1.98632	4.63931	8.21044	1.0046e-06	2.55529e-05	5.78953
10360_at	YLL026W	HSP104	-1.98577	8.3726	-3.12138	0.00749978	0.0336427	-3.30327
8208_at	YOR318C	NA	1.98255	6.64206	7.76748	1.91603e-06	4.28924e-05	5.12566
8685_at	YOL149W	DCP1	-1.98113	5.84679	-7.29091	3.94394e-06	7.71837e-05	4.38273
5761_at	YEL029C	BUD16	-1.98055	7.98583	-6.90685	7.20946e-06	0.000123942	3.76171
5538_at	YEL020W-A	TIM9	-1.98018	4.41059	-5.22444	0.000128328	0.00124915	0.802235
4980_at	YGR008C	STF2	-1.97852	3.75033	-4.78497	0.000289942	0.00240802	-0.0311722
7931_at	YPL183W-A	NA	-1.97723	5.11525	-9.09602	2.95918e-07	9.88935e-06	7.04373
4552_at	YHL010C	NA	1.97646	6.03664	3.44596	0.00393149	0.0198919	-2.66399
7539_at	YPR187W	RPO26	1.97574	5.48992	6.07988	2.82725e-05	0.000368392	2.35529
7701_at	YPR038W	NA	1.97558	6.25375	5.43372	8.78189e-05	0.000913923	1.19103
5662_at	YER050C	RSM18	1.97533	6.8298	4.18276	0.000919192	0.00613781	-1.20416
8216_at	YOR326W	MYO2	1.97464	5.32955	2.19841	0.0452187	0.134561	-5.02803
11013_at	YJL008C	CCT8	1.97357	3.78457	8.51704	6.51395e-07	1.82606e-05	6.23451
8276_at	YOR255W	OSW1	-1.97312	5.82796	-4.99684	0.000195128	0.00174299	0.373356
7416_at	YBL036C	NA	1.96991	6.59482	4.76576	0.000300627	0.00247256	-0.0680947
7325_at	YBR057C	MUM2	-1.96972	7.75643	-6.57035	1.24302e-05	0.000191795	3.20089
5048_at	YGL059W	NA	1.96644	7.42341	9.00774	3.32959e-07	1.07549e-05	6.92289
5775_at	YEL059C-A	SOM1	-1.96461	4.72454	-4.27637	0.000766378	0.00529152	-1.01997
5987_at	YDR473C	PRP3	1.96248	8.62261	4.45031	0.000547904	0.00403685	-0.67934
10941_at	YJR102C	VPS25	-1.96168	8.17107	-6.35087	1.78813e-05	0.000258794	2.82662
5317_s_at	YFL042C	NA	1.95958	7.3232	3.88277	0.00165442	0.00984321	-1.79742
9145_at	YNL294C	RIM21	1.95685	6.3622	4.32953	0.000691453	0.00487148	-0.915636
10060_at	YLR258W	GSY2	1.95585	9.46367	2.80544	0.0140194	0.0552542	-3.91452
4511_at	YHR037W	PUT2	1.9551	9.43799	4.29013	0.000746218	0.00517636	-0.992948
9307_at	YMR301C	ATM1	1.95405	5.93801	2.19883	0.0451828	0.134497	-5.02729
10976_at	YJR047C	ANB1	-1.95369	7.43001	-4.19416	0.000899032	0.00602907	-1.18171
7773_at	YPL025C	NA	1.95362	6.58344	4.59491	0.000415528	0.00320574	-0.398002
5134_at	YGL108C	NA	-1.94924	5.01827	-6.02008	3.13234e-05	0.00039881	2.2499
6170_at	YDR296W	MHR1	1.94756	6.81566	3.9947	0.00132757	0.00832853	-1.57564
3383_f_at	NA	NA	1.94722	6.24283	6.66706	1.06123e-05	0.000170215	3.36367
10372_at	YLL016W	SDC25	1.94569	5.13106	3.88283	0.00165422	0.00984321	-1.7973
4182_at	YIL084C	SDS3	-1.94562	7.87057	-6.00458	3.21691e-05	0.000408569	2.22251
6483_at	YDL024C	DIA3	1.94222	7.65951	4.23677	0.000827575	0.00562666	-1.09783
5425_at	YFL055W	AGP3	1.94091	7.24217	3.04699	0.00869412	0.0376611	-3.44845
8434_at	YOR097C	NA	-1.94054	6.24259	-5.75687	4.94652e-05	0.000577197	1.78028
5104_at	YGL093W	SPC105	1.93815	8.78165	2.38816	0.0315621	0.102552	-4.69149
7380_f_at	YBL026W	NA	1.93799	3.15986	3.43569	0.00401265	0.0202148	-2.68432
9020_at	YNL148C	ALF1	-1.93708	6.73393	-3.16715	0.00684734	0.0313333	-3.21364
11291_at	YAR029W	NA	-1.93641	4.59548	-5.69179	5.54636e-05	0.000626819	1.66271
9140_at	YNL299W	TRF5	1.93563	7.31177	2.1366	0.0507498	0.147032	-5.13478
7132_at	YBR222C	PCS60	-1.93532	9.19005	-5.87955	3.99296e-05	0.000483454	2.00034
11237_at	YJL189W	RPL39	-1.9345	4.24309	-7.02547	5.97152e-06	0.00010679	3.95567
6507_at	YDL045C	FAD1	-1.93239	9.77442	-5.40296	9.28209e-05	0.000955329	1.13422
9760_at	YML125C	NA	1.9315	7.20874	5.23212	0.00012654	0.00123349	0.816603
5727_at	YEL018W	EAF5	-1.93118	8.67892	-5.71853	5.29116e-05	0.000606794	1.71109
8728_at	YOL152W	FRE7	1.93002	6.6244	3.14587	0.0071433	0.0324174	-3.25533
10011_at	YLR296W	NA	-1.92858	6.03913	-5.0087	0.000190884	0.00171337	0.395841
10100_at	YLR252W	SYM1	1.92677	5.21915	7.60402	2.44641e-06	5.21399e-05	4.87424
4260_at	YIL141W	AXL2	-1.92597	9.30029	-4.36973	0.000639809	0.00460495	-0.836855
5607_at	YER122C	GLO3	1.92504	8.25182	3.65867	0.00257659	0.0140619	-2.24216
10643_at	YKL053C-A	MDM35	-1.92417	4.9418	-4.68312	0.00035143	0.00279915	-0.22732
4060_at	YIR024C	NA	1.92371	6.2453	5.70151	5.45209e-05	0.000619917	1.68032
2203_s_at	NA	NA	1.92215	7.63185	2.80679	0.0139823	0.0552113	-3.91194
8998_at	YNL124W	NAF1	-1.92201	7.21821	-3.61756	0.00279549	0.0149804	-2.32375
7163_at	YBR207W	FTH1	1.92134	7.68465	5.73933	5.10119e-05	0.000590814	1.74865
5544_at	YER150W	SPI1	-1.92033	4.9259	-5.38795	9.53673e-05	0.000976155	1.10647
10586_at	NA	NA	-1.91994	5.19309	-3.94046	0.00147682	0.00901107	-1.68306
8918_at	YNL069C	RPL16B	-1.91951	8.79403	-5.45995	8.37765e-05	0.0008797	1.23937
5024_at	YGL038C	OCH1	1.91899	6.6438	3.4594	0.00382778	0.0194092	-2.63737
5610_at	YER082C	UTP7	1.91822	9.02195	4.82953	0.000266647	0.00224653	0.0543115
7114_at	YBR249C	ARO4	-1.91779	9.46637	-6.18761	2.35364e-05	0.00032028	2.54388
9525_at	YMR126C	NA	1.91753	8.1647	9.03884	3.19378e-07	1.04863e-05	6.96557
4105_at	YIL020C	HIS6	-1.91676	6.86407	-4.73333	0.000319592	0.00259877	-0.130495
4486_at	YHR058C	MED6	-1.91667	8.42613	-6.64923	1.09252e-05	0.000173152	3.33375
5757_at	YEL033W	NA	-1.91557	6.91825	-4.19205	0.000902727	0.00604548	-1.18586
7301_at	YBR078W	ECM33	1.91272	8.41279	3.7878	0.00199542	0.0113954	-1.98584
4721_at	YGR291C	NA	-1.91266	5.04682	-7.31539	3.79767e-06	7.47203e-05	4.42164
5747_at	YEL043W	NA	1.91235	9.74047	2.44351	0.0283825	0.0944902	-4.59109
11127_at	YJL122W	NA	-1.91211	7.41142	-4.86205	0.000250875	0.00213874	0.116566
5115_at	YGL127C	SOH1	-1.9118	7.19289	-5.15946	0.000144537	0.0013712	0.680421
5388_at	YFR001W	LOC1	-1.91144	6.51758	-5.61101	6.39811e-05	0.000705152	1.51601
7124_at	YBR214W	SDS24	1.91108	9.90424	8.46011	7.05374e-07	1.95391e-05	6.15277
8915_at	YNL072W	RNH201	-1.91032	7.00195	-2.6026	0.0208594	0.0748071	-4.2976
10024_at	YLR309C	IMH1	1.91003	6.74525	2.24251	0.0416216	0.127306	-4.95095
4523_at	YHR005C-A	MRS11	-1.90897	5.21715	-4.21209	0.000868223	0.00587309	-1.1464
9728_at	YML071C	COG8	-1.90666	9.26995	-4.90696	0.00023067	0.00199935	0.202333
4442_at	YHR104W	GRE3	1.90572	8.28654	7.18248	4.667e-06	8.83701e-05	4.20944
8931_at	YNL056W	NA	-1.90506	3.5762	-6.07941	2.82954e-05	0.000368392	2.35446
4215_g_at	YIL141W	AXL2	-1.90329	8.16003	-3.53682	0.00328167	0.0170475	-2.48394
2647_at	NA	NA	1.9029	4.88677	3.90388	0.00158705	0.00955813	-1.75557
6049_at	YDR398W	UTP5	-1.90212	11.4938	-4.00507	0.00130084	0.00820495	-1.55512
5624_at	YER093C-A	NA	1.902	6.34972	4.77029	0.000298071	0.0024602	-0.0593828
9527_at	YMR128W	ECM16	-1.90076	6.78898	-2.47844	0.0265353	0.0894573	-4.52724
7700_at	YPR037C	ERV2	1.8988	6.53446	5.69308	5.53375e-05	0.000626152	1.66505
7658_at	YPR082C	DIB1	-1.8965	5.43842	-5.33612	0.000104736	0.00105017	1.01039
4764_at	YGR244C	LSC2	1.89514	8.75924	5.58489	6.70196e-05	0.000731729	1.46838
7650_at	YPR118W	NA	-1.89384	9.66061	-9.3576	2.09665e-07	7.49893e-06	7.39653
7222_at	YBR131W	CCZ1	1.89343	8.87428	3.44372	0.00394903	0.0199482	-2.66842
6878_at	YCL001W-A	NA	1.89189	4.13477	6.13536	2.57202e-05	0.000343488	2.4526
3393_f_at	NA	NA	1.89117	8.81827	4.64913	0.000374829	0.00294779	-0.293009
7397_at	YBL010C	NA	1.89108	7.58464	6.03355	3.06071e-05	0.000393435	2.27369
8535_at	YOR017W	PET127	1.88889	6.26941	2.21209	0.0440728	0.132105	-5.00419
8978_at	YNL099C	OCA1	-1.88805	8.40911	-6.0468	2.99197e-05	0.000386843	2.29705
2198_at	NA	NA	1.88662	4.99868	2.70899	0.0169445	0.0637298	-4.09777
10174_at	YLR144C	ACF2	-1.8864	8.10241	-1.97242	0.0686287	0.182677	-5.41062
5112_at	YGL085W	NA	1.88566	5.89832	4.00144	0.00131012	0.00824473	-1.56229
7312_at	YBR044C	TCM62	1.88565	3.36237	4.80183	0.000280892	0.00234537	0.00118986
6819_at	YCR079W	NA	1.88478	10.0115	8.68231	5.1806e-07	1.51602e-05	6.46957
5623_at	YER093C-A	NA	1.88296	7.07363	4.12523	0.00102828	0.00677416	-1.31762
11085_at	YJL072C	PSF2	1.8814	6.58011	4.47447	0.000523079	0.00387843	-0.632205
8262_at	YOR286W	NA	-1.87993	5.52467	-7.04838	5.75943e-06	0.000104194	3.99291
10488_at	YKR063C	LAS1	-1.87852	6.48096	-3.92388	0.00152578	0.00925482	-1.71592
2648_at	NA	NA	1.87839	4.6179	3.71566	0.00230149	0.0127731	-2.12904
7958_at	YPL200W	CSM4	1.87827	4.4939	5.43468	8.76685e-05	0.000913923	1.19279
9355_at	YMR261C	TPS3	1.87717	6.11483	2.0239	0.062481	0.170394	-5.3254
6506_at	YDL045W-A	MRP10	-1.87632	6.83446	-4.04924	0.00119295	0.00763799	-1.46773
8373_at	YOR171C	LCB4	1.8761	6.86666	4.25678	0.000796052	0.00545175	-1.05848
10464_at	YKR085C	MRPL20	-1.87558	5.92032	-5.62219	6.27256e-05	0.000693772	1.53636
10854_at	YJR152W	DAL5	-1.87177	7.73355	-1.74996	0.10198	0.242234	-5.76386
10631_at	YKL065C	NA	1.86954	5.44348	4.53685	0.000464197	0.0035316	-0.510741
7591_at	YPR148C	NA	1.86893	8.37534	4.68265	0.000351741	0.00279924	-0.228222
7683_at	YPR063C	NA	1.86754	7.38639	7.16448	4.79996e-06	9.03379e-05	4.18052
8031_at	YPL264C	NA	1.86717	10.6409	9.11463	2.88686e-07	9.69384e-06	7.06908
9644_at	YML020W	NA	-1.86599	8.95532	-5.06218	0.000172891	0.00158239	0.497104
9986_at	YLR317W	NA	1.86588	7.06313	5.53753	7.29175e-05	0.00078556	1.38181
4741_at	YGR265W	NA	1.86502	7.02779	3.72708	0.00225005	0.0125473	-2.10637
5540_at	YER091C-A	NA	-1.86288	6.16192	-7.02983	5.93057e-06	0.000106465	3.96276
5350_at	YFR008W	FAR7	-1.86253	4.64184	-6.56895	1.2459e-05	0.000191921	3.19851
5002_at	YGL015C	NA	1.86186	6.25789	5.95858	3.48222e-05	0.000433358	2.14103
4850_at	YGR150C	NA	1.86108	5.52722	2.14854	0.0496348	0.144388	-5.11428
9767_at	YML118W	NGL3	-1.86098	10.1892	-8.04804	1.26938e-06	3.05405e-05	5.54907
9444_at	YMR174C	PAI3	-1.86018	4.25119	-6.11353	2.66943e-05	0.000354468	2.41437
11199_at	YJL181W	NA	-1.85903	11.0713	-4.20627	0.000878103	0.00592704	-1.15786
10043_at	YLR284C	ECI1	-1.85843	9.19868	-5.42431	8.93193e-05	0.000926439	1.17366
10577_at	YKR014C	YPT52	-1.85717	4.82641	-5.70048	5.46199e-05	0.000620289	1.67845
10154_at	YLR174W	IDP2	1.85515	7.71977	3.87508	0.00167967	0.0099558	-1.81266
5132_at	YGL110C	CUE3	-1.85045	6.20547	-2.42175	0.0295943	0.0974473	-4.63067
8689_at	YOL145C	CTR9	1.8499	5.15006	2.21384	0.0439277	0.131904	-5.00113
4247_at	YIL154C	IMP2'	1.84967	9.19215	3.20551	0.0063443	0.0294354	-3.13837
4339_at	YHR179W	OYE2	-1.84779	10.1289	-6.84522	7.95676e-06	0.000134803	3.66016
5998_at	YDR484W	VPS52	-1.84605	8.22602	-3.3063	0.00519119	0.0249535	-2.93999
5328_at	YFR031C	SMC2	-1.84602	8.44302	-1.91227	0.0765053	0.197069	-5.5086
11315_i_at	NA	NA	1.84575	12.3236	7.50404	2.84555e-06	5.92928e-05	4.71872
10206_at	YLR132C	NA	-1.84531	7.31709	-6.62643	1.13394e-05	0.000177904	3.29544
5008_at	YGL009C	LEU1	-1.84457	7.8402	-2.26283	0.040056	0.123488	-4.91519
11010_at	YJL011C	RPC17	-1.84237	7.21639	-6.65666	1.07936e-05	0.000171649	3.34623
10040_at	YLR281C	NA	-1.84013	6.59673	-4.33451	0.000684827	0.0048417	-0.905866
5088_at	YGL064C	MRH4	1.83985	10.3383	5.25621	0.000121101	0.00118873	0.861607
7656_s_at	NA	NA	1.83982	8.45159	4.00123	0.00131068	0.00824473	-1.56272
4090_at	YIR009W	MSL1	-1.83972	4.31302	-3.63362	0.00270785	0.0146115	-2.29189
3414_f_at	NA	NA	1.83816	6.71074	5.00669	0.000191593	0.00171479	0.392046
5016_at	YGL001C	ERG26	1.83788	8.77042	7.31464	3.80205e-06	7.47203e-05	4.42045
8820_at	YNR061C	NA	1.83657	6.19666	3.8629	0.00172049	0.0101522	-1.83683
9851_at	YLR447C	VMA6	1.83623	6.48458	3.5185	0.00340338	0.0176014	-2.52027
6374_at	YDR094W	NA	-1.83293	5.2229	-4.66777	0.000361804	0.00286467	-0.25697
8286_at	YOR265W	RBL2	-1.8322	5.90027	-4.87295	0.000245812	0.00210519	0.137389
9549_at	YMR107W	SPG4	-1.83143	4.08321	-2.63464	0.0195965	0.0712078	-4.23769
5264_at	YGL249W	ZIP2	1.82886	8.77603	3.11262	0.00763143	0.0340561	-3.32039
10447_s_at	YKL198C	PTK1	1.82872	9.71492	2.75222	0.0155667	0.0597442	-4.01588
9912_at	YLR421C	RPN13	-1.82793	5.75086	-4.10697	0.0010656	0.00696593	-1.35366
9584_at	YMR054W	STV1	1.82753	8.05528	1.89767	0.0785371	0.201247	-5.53213
11014_at	YJL007C	NA	1.82715	5.21765	7.60877	2.42897e-06	5.20056e-05	4.88161
6686_at	YDL221W	NA	-1.82698	6.00844	-8.92034	3.74502e-07	1.1771e-05	6.80238
5535_at	YER186C	NA	-1.82619	6.39873	-4.04241	0.00120903	0.00773034	-1.48125
7882_f_at	YPL143W	RPL33AorRPL33B	-1.82289	5.88875	-5.97459	3.3874e-05	0.000424448	2.16941
9114_at	YNL234W	NA	-1.82237	4.69739	-5.41761	9.0403e-05	0.000935601	1.16129
6565_at	YDL078C	MDH3	-1.82138	10.1358	-6.69845	1.00839e-05	0.000163439	3.41624
3877_at	NA	NA	1.82129	4.83754	7.97853	1.40445e-06	3.31074e-05	5.44511
11316_r_at	NA	NA	1.81968	12.6711	7.60207	2.45362e-06	5.21743e-05	4.87122
4378_at	YHR129C	ARP1	-1.81536	9.04115	-8.86221	4.05151e-07	1.25651e-05	6.72173
7868_at	YPL112C	PEX25	1.81512	9.00431	3.71328	0.00231235	0.0128105	-2.13375
3409_f_at	NA	NA	1.81343	8.0783	6.31048	1.91327e-05	0.000272262	2.75701
11161_at	YJL134W	LCB3	-1.81305	9.87487	-7.85681	1.67886e-06	3.83183e-05	5.26158
7109_at	YBR244W	GPX2	-1.81293	6.37991	-5.74478	5.05256e-05	0.000586638	1.75849
10137_at	YLR202C	NA	-1.81292	7.13737	-7.63443	2.33708e-06	5.05166e-05	4.92129
6054_at	YDR403W	DIT1	1.81256	7.55498	3.48795	0.00361649	0.0185291	-2.58082
6215_at	YDR250C	NA	-1.8121	6.63094	-5.85623	4.15818e-05	0.000501507	1.95867
5345_at	YFR003C	YPI1	-1.81196	6.50809	-4.76288	0.000302261	0.00247944	-0.0736243
11109_at	YJL093C	TOK1	1.8091	7.0793	3.2022	0.00638623	0.0295858	-3.14487
8618_at	YOL080C	REX4	-1.80733	9.00051	-6.6777	1.04301e-05	0.000168451	3.38149
7795_at	YPL048W	CAM1	-1.80113	8.75707	-5.40693	9.21591e-05	0.000950613	1.14156
5992_at	YDR478W	SNM1	-1.80085	6.81196	-4.80207	0.000280762	0.00234537	0.00165988
10203_at	YLR129W	DIP2	-1.80075	6.34335	-2.55087	0.0230656	0.0806433	-4.39376
10282_at	YLR073C	NA	-1.79604	6.93444	-4.73824	0.000316644	0.00258058	-0.121045
3836_f_at	NA	NA	1.79351	3.98856	2.56862	0.0222844	0.0786045	-4.36084
9497_i_at	YMR143W	RPS16AorRPS16B	-1.79336	3.59681	-4.81687	0.000273064	0.00229231	0.0300388
10193_at	YLR120C	YPS1	1.79029	10.4405	4.32373	0.000699247	0.00490787	-0.927007
6175_at	YDR301W	CFT1	1.78969	4.57929	2.18302	0.0465408	0.137272	-5.05475
5161_at	YGL174W	BUD13	-1.7895	8.19198	-5.72288	5.25084e-05	0.000604448	1.71895
4315_at	YHR201C	PPX1	-1.7884	10.3302	-6.22699	2.20196e-05	0.000304523	2.61241
8229_at	YOR297C	TIM18	1.78482	6.92933	5.31461	0.000108901	0.00108263	0.970422
9322_at	YMR314W	PRE5	1.78371	4.44758	4.9849	0.000199504	0.00177031	0.350679
7887_at	YPL138C	SPP1	1.78293	7.9344	2.76451	0.0151951	0.0587223	-3.99252
5953_at	YDR529C	QCR7	1.78157	5.62672	5.19111	0.000136393	0.00131532	0.739804
6212_at	YDR247W	VHS1	-1.78101	8.51763	-5.13496	0.00015119	0.00142418	0.634353
2810_at	NA	NA	1.78078	3.60966	2.99909	0.00956075	0.0405662	-3.54156
5273_at	YGL240W	DOC1	1.77959	6.89796	6.49921	1.3975e-05	0.000211437	3.08031
8217_at	YOR327C	SNC2	-1.77652	4.26181	-4.44163	0.000557117	0.00409615	-0.696285
3787_f_at	NA	NA	1.77514	5.05499	3.3955	0.00434671	0.0216302	-2.76383
5368_at	YFL017W-A	SMX2	-1.77459	6.48676	-3.58012	0.0030112	0.0158811	-2.39805
6603_at	YDL127W	PCL2	1.77241	9.28935	7.28619	3.97285e-06	7.72637e-05	4.37522
6487_at	YDL020C	RPN4	1.77103	8.02977	1.2695	0.224942	0.41821	-6.42642
5956_at	YDR532C	NA	-1.76788	6.7418	-4.32427	0.000698518	0.00490645	-0.92595
10046_at	YLR287C	NA	-1.76637	5.22743	-7.28663	3.97013e-06	7.72637e-05	4.37592
8546_at	YOR028C	CIN5	-1.76636	7.65484	-6.17923	2.38731e-05	0.000323409	2.52926
10044_at	YLR285W	NNT1	-1.76604	7.36905	-4.97064	0.00020486	0.00180753	0.323597
11166_at	YJL129C	TRK1	-1.76377	7.62888	-2.69439	0.0174361	0.0648989	-4.12535
7307_at	YBR039W	ATP3	1.76349	9.03152	6.35993	1.76128e-05	0.000256098	2.84219
10881_at	YJR133W	XPT1	-1.76278	7.47233	-3.46785	0.00376393	0.0191479	-2.62062
6519_at	YDL033C	SLM3	1.76078	8.07689	5.41991	9.00287e-05	0.000932761	1.16554
9624_at	YMR002W	NA	-1.76041	6.31152	-6.28694	1.99042e-05	0.000280673	2.71633
4380_at	YHR131C	NA	1.75988	5.52628	3.05151	0.00861644	0.0374462	-3.43964
4528_i_at	YHR010W	RPL27A	-1.75829	7.72403	-4.75572	0.00030637	0.00250435	-0.0874011
5973_at	YDR504C	SPG3	1.75741	6.58005	6.33656	1.83145e-05	0.000263025	2.80198
8781_at	YNR069C	BSC5	1.75707	8.36329	4.38033	0.000626865	0.00453275	-0.816104
7255_at	YBR119W	MUD1	-1.75704	9.24929	-5.80094	4.57913e-05	0.000543154	1.85957
9979_at	YLR355C	ILV5	1.75667	6.45964	3.3937	0.00436229	0.0216952	-2.76738
5592_at	YER107C	GLE2	-1.75549	8.94735	-6.2164	2.24171e-05	0.000309105	2.594
7913_at	YPL157W	TGS1	-1.75458	6.54053	-4.3482	0.000666956	0.00474384	-0.879034
11380_at	YAL066W	NA	-1.75448	5.04666	-3.85536	0.00174627	0.0102589	-1.85178
10762_at	YKL204W	EAP1	1.75427	8.9586	3.34793	0.00477832	0.0233537	-2.85783
7395_at	YBL012C	NA	1.75229	7.33419	3.77815	0.00203383	0.0115556	-2.00498
4529_f_at	YHR010W	RPL27A	-1.7512	8.14519	-5.81086	4.50046e-05	0.000535182	1.87738
10541_at	YKR024C	DBP7	-1.75092	9.43217	-2.96465	0.0102361	0.0428804	-3.60831
4832_at	YGR177C	ATF2	1.74861	10.6495	6.12088	2.6362e-05	0.000350555	2.42725
6276_at	YDR219C	NA	1.74709	5.32422	5.13177	0.000152079	0.00142823	0.628354
6834_at	YCR046C	IMG1	1.74561	6.86519	4.40438	0.000598493	0.00436479	-0.769069
11359_at	YAL049C	NA	-1.74493	5.53391	-3.6559	0.00259078	0.0141267	-2.24766
7037_s_at	YBR006W	UGA2	1.74357	10.9249	8.81036	4.3474e-07	1.3384e-05	6.64944
5352_at	YFR010W	UBP6	-1.74285	9.68222	-4.6253	0.000392185	0.00305852	-0.339121
6550_at	YDL091C	UBX3	-1.74057	8.05563	-2.62935	0.0197998	0.071835	-4.2476
3629_f_at	YNR077C	NA	-1.73956	6.5786	-5.89953	3.85684e-05	0.000471252	2.03599
4950_at	YGR069W	NA	1.73927	5.13225	6.39214	1.66911e-05	0.000244219	2.89751
3948_s_at	YKL198C	PTK1	1.73907	7.69573	2.3026	0.0371512	0.116633	-4.84478
9044_at	YNL169C	PSD1	-1.73904	7.88032	-3.55041	0.00319423	0.0166861	-2.45698
3315_f_at	NA	NA	1.73793	4.35676	2.14022	0.05041	0.146332	-5.12859
9944_at	YLR365W	NA	-1.73764	6.56162	-4.49348	0.000504365	0.00377869	-0.595161
8619_at	YOL079W	NA	-1.73567	7.69238	-7.49999	2.86307e-06	5.9525e-05	4.7124
3666_f_at	NA	NA	1.73546	6.83509	4.2538	0.000800667	0.00547563	-1.06434
9419_at	YMR193C-A	NA	-1.73261	9.08806	-6.10676	2.70043e-05	0.000356556	2.40249
4496_at	YHR022C	NA	1.73248	7.04325	8.19853	1.02186e-06	2.58512e-05	5.77201
4494_at	YHR021C	RPS27B	-1.73121	8.45419	-5.30254	0.000111314	0.00110427	0.947959
10775_at	YKL188C	PXA2	1.73047	4.66872	2.2327	0.0423978	0.128878	-4.96816
8841_at	YNR038W	DBP6	1.72887	8.51576	2.4207	0.0296541	0.0975408	-4.63258
10318_at	YLR022C	NA	-1.72878	5.10115	-5.23562	0.000125734	0.00122904	0.823147
7154_at	YBR198C	TAF5	1.72868	6.97469	2.31339	0.0363984	0.114907	-4.8256
10984_at	YJR055W	HIT1	-1.72831	5.97103	-4.60855	0.000404879	0.00313395	-0.371566
9488_at	YMR135C	GID8	1.7282	8.92439	6.13157	2.58865e-05	0.000345216	2.44597
8644_at	YOL099C	NA	1.72693	6.1366	5.92442	3.69405e-05	0.000454334	2.08032
3491_f_at	NA	NA	1.72344	4.9807	7.99666	1.36782e-06	3.24077e-05	5.47228
4580_at	YHL028W	WSC4	1.7229	10.4574	3.97021	0.00139296	0.00861256	-1.62413
9854_at	YLR450W	HMG2	-1.72163	8.13707	-2.26975	0.0395357	0.122207	-4.90298
4507_at	YHR033W	NA	-1.7212	8.2959	-2.43044	0.0291043	0.0962071	-4.61487
6120_at	NA	NA	-1.71911	8.2564	-5.72234	5.25586e-05	0.000604448	1.71797
11209_at	YJL174W	KRE9	-1.71852	6.6446	-3.86624	0.00170919	0.0101111	-1.8302
11203_i_at	YJL177W	RPL17AorRPL17B	-1.71702	7.18919	-3.92	0.00153747	0.0093112	-1.7236
3248_s_at	NA	NA	1.71566	3.96889	2.67738	0.0180267	0.0664947	-4.15742
8458_at	YOR077W	RTS2	-1.71561	7.19209	-5.81975	4.43117e-05	0.000527615	1.89332
11124_at	YJL125C	GCD14	-1.71527	10.0998	-8.74163	4.77529e-07	1.43798e-05	6.55315
5426_at	YFL054C	NA	1.71374	8.17965	1.91433	0.0762229	0.19645	-5.50528
5658_at	YER047C	SAP1	-1.7126	5.93078	-2.4358	0.0288061	0.0955595	-4.60512
9712_at	YML087C	NA	1.71226	6.99562	8.0175	1.32696e-06	3.16e-05	5.50346
10736_at	YKL137W	NA	-1.71049	3.768	-5.17328	0.00014092	0.00134646	0.70637
4550_at	YHL012W	NA	1.70949	4.80639	3.59448	0.00292659	0.0154946	-2.36957
4159_at	YIL058W	NA	1.70888	5.13779	3.52695	0.0033467	0.0173275	-2.50352
5050_at	YGL057C	NA	1.70877	8.08622	6.5775	1.22853e-05	0.000189872	3.21296
10564_at	YKR001C	VPS1	1.70851	7.13538	3.89198	0.00162467	0.00971662	-1.77916
4990_at	YGR017W	NA	-1.707	6.6761	-4.68789	0.000348265	0.00278106	-0.218099
4817_at	YGR207C	NA	1.70597	5.12163	5.46312	8.3302e-05	0.00087669	1.2452
10814_s_at	NA	NA	-1.70578	6.8316	-5.3587	0.000100542	0.00101576	1.05228
8986_at	YNL136W	EAF7	1.70537	4.82342	3.06875	0.00832642	0.0364745	-3.40604
5670_i_at	YER056C-A	RPL34BorRPL34A	1.70344	6.49997	2.88645	0.0119488	0.0485178	-3.75924
9347_at	YMR296C	LCB1	1.70223	10.2251	3.35277	0.00473251	0.0231662	-2.84827
10022_at	YLR307W	CDA1	1.70144	8.30333	6.59076	1.20209e-05	0.000186404	3.23535
4738_at	YGR262C	BUD32	-1.70136	5.7437	-3.55738	0.00315035	0.0164846	-2.44317
11000_at	YJR022W	LSM8	1.70073	8.64481	5.38454	9.59555e-05	0.000978956	1.10016
11387_at	NA	NA	-1.69796	6.85938	-3.64997	0.00262147	0.0142276	-2.25945
8397_at	YOR150W	MRPL23	-1.69734	7.01914	-4.05334	0.00118342	0.00759261	-1.45963
10239_at	YLR075W	RPL10	1.69473	7.49739	3.61587	0.00280491	0.0150137	-2.32712
5022_at	YGR005C	TFG2	-1.69406	5.2474	-2.3963	0.0310742	0.101426	-4.67679
7295_at	YBR072W	HSP26	-1.6935	6.76544	-5.98752	3.31277e-05	0.000419034	2.19232
5789_at	YEL046C	GLY1	1.69254	8.15669	4.53324	0.000467412	0.00354451	-0.517763
6280_at	YDR179C	CSN9	-1.69137	3.11058	-4.62909	0.00038937	0.0030442	-0.331785
10005_at	YLR335W	NUP2	1.69074	5.98586	2.27249	0.0393313	0.121829	-4.89814
10028_at	YLR313C	SPH1	-1.69057	10.832	-5.64202	6.05599e-05	0.00067381	1.57244
5108_at	YGL089C	MF(ALPHA)2	-1.69039	6.27298	-4.38134	0.000625643	0.00453094	-0.814123
6813_at	YCR072C	NA	1.68969	9.31366	4.27949	0.000761758	0.00526352	-1.01385
6168_at	YDR294C	DPL1	1.68849	8.32978	2.21195	0.0440846	0.132105	-5.00444
5643_at	YER070W	RNR1	1.68814	8.00823	2.46112	0.0274363	0.0920293	-4.55894
6397_at	YDR073W	SNF11	-1.68595	4.75826	-4.99052	0.000197432	0.00175625	0.361354
7102_at	YBR237W	PRP5	1.68418	6.25042	2.24299	0.0415843	0.127233	-4.95011
4284_at	YIL167W	SDL1	1.68409	7.89424	4.11784	0.00104321	0.00686286	-1.3322
5983_at	YDR469W	SDC1	-1.68372	4.13702	-3.37536	0.00452451	0.0223354	-2.80365
9395_at	YMR213W	CEF1	-1.68317	9.1326	-2.84928	0.0128589	0.0516808	-3.83064
3620_f_at	NA	NA	1.68079	7.27881	5.11231	0.000157623	0.00146409	0.591704
11160_at	YJL135W	LCB3	1.6806	4.08629	2.99691	0.0096022	0.0407069	-3.54579
4808_at	YGR198W	NA	-1.68029	9.70367	-3.21968	0.0061679	0.0287169	-3.11053
9103_at	YNL246W	VPS75	-1.68006	8.64978	-4.75852	0.000304754	0.00249551	-0.0820067
4414_at	YHR121W	LSM12	-1.6762	4.37118	-3.3973	0.00433115	0.0215749	-2.76027
10494_at	YKR069W	MET1	-1.6756	11.0132	-4.52887	0.000471335	0.00356268	-0.526268
6638_at	YDL137W	ARF2	-1.67532	9.14323	-4.06233	0.00116277	0.0074962	-1.44185
10996_at	YJR019C	TES1	1.67484	8.9965	3.16236	0.00691292	0.0316024	-3.22303
7916_at	YPL154C	PEP4	1.6748	10.1974	6.60822	1.16822e-05	0.000182493	3.26478
10106_at	YLR214W	FRE1	1.67386	5.04797	2.21673	0.0436899	0.131478	-4.99608
6013_at	YDR454C	GUK1	-1.67365	8.70996	-4.51051	0.000488179	0.00367512	-0.561987
4124_at	YIL047C	SYG1	1.67279	7.16393	2.3787	0.0321382	0.103882	-4.70855
4073_at	YIR037W	HYR1	-1.67109	6.96295	-5.75714	4.94418e-05	0.000577197	1.78076
4478_at	YHR049W	FSH1	-1.6696	7.1761	-4.27168	0.000773374	0.00532408	-1.02919
6536_at	YDL062W	NA	1.66926	7.81132	3.76246	0.0020979	0.0118531	-2.03612
6440_at	YDR026C	NA	-1.66924	8.66176	-3.99001	0.00133984	0.00839425	-1.58492
10104_at	YLR212C	TUB4	-1.66754	6.74781	-1.81413	0.0911229	0.223733	-5.66461
11065_at	YJL048C	UBX6	-1.66456	8.90545	-3.79762	0.00195708	0.0112151	-1.96635
5082_at	YGL070C	RPB9	-1.66443	4.49245	-4.56936	0.000436267	0.0033439	-0.447588
5958_at	YDR489W	SLD5	1.66359	5.13098	3.19299	0.00650428	0.0299691	-3.16295
8847_at	YNL002C	RLP7	1.66211	4.21799	4.17315	0.000936553	0.00623145	-1.2231
4574_at	YHL034C	SBP1	-1.65798	8.16296	-3.34353	0.00482042	0.0235349	-2.86653
3884_f_at	NA	NA	1.65768	5.24717	5.78203	4.73313e-05	0.000557598	1.82558
8178_at	YOR379C	NA	-1.6575	8.24312	-2.06783	0.0576397	0.160234	-5.25176
6716_at	YDL237W	NA	1.65634	9.62767	6.62279	1.1407e-05	0.000178665	3.28932
7826_at	YPL063W	TIM50	1.65572	5.67764	2.28407	0.038479	0.119814	-4.87766
7166_at	YBR210W	ERV15	-1.65439	6.66859	-4.3934	0.000611279	0.00444762	-0.790538
4705_at	YGR275W	RTT102	-1.65439	4.96176	-4.93888	0.000217336	0.00189433	0.263173
9093_at	YNL210W	MER1	1.64924	8.69057	5.55539	7.06325e-05	0.000768479	1.41449
8803_at	YNR045W	PET494	-1.64743	7.61622	-4.29189	0.000743677	0.00516769	-0.989488
3440_f_at	NA	NA	-1.64702	3.64569	-5.82981	4.35403e-05	0.000521757	1.91137
10771_at	YKL191W	DPH2	-1.64681	11.5199	-8.5888	5.89513e-07	1.68291e-05	6.33697
6715_at	YDL238C	GUD1	1.64624	9.86914	5.21041	0.00013166	0.00127759	0.775978
4487_at	YHR059W	FYV4	-1.64586	4.84579	-4.29487	0.000739394	0.00514325	-0.983632
6895_at	YCL037C	SRO9	-1.64585	7.89467	-3.8246	0.00185554	0.010752	-1.91281
3122_at	NA	NA	-1.64478	3.54758	-5.59481	6.58485e-05	0.000722322	1.48648
8035_at	YPL260W	NA	-1.64451	11.3713	-5.37241	9.80811e-05	0.000994122	1.0777
4146_at	YIL025C	NA	-1.64368	6.35986	-3.87606	0.00167643	0.00994881	-1.81072
8815_at	YNR056C	BIO5	-1.64367	7.97304	-2.85136	0.0128062	0.0515283	-3.82665
2683_at	NA	NA	1.6416	8.13494	3.66792	0.0025298	0.0138752	-2.22381
10722_at	YKL151C	NA	-1.63929	8.03274	-4.72516	0.00032456	0.00262953	-0.146225
4351_at	YHR191C	CTF8	-1.63861	6.47677	-4.01779	0.00126877	0.00803527	-1.52993
3502_f_at	NA	NA	1.6377	7.95	4.83661	0.000263132	0.00222092	0.0678588
7136_at	YBR226C	NA	-1.63397	6.0148	-6.97089	6.51074e-06	0.000114459	3.86666
5248_at	YGL222C	EDC1	-1.632	3.05254	-9.48326	1.78132e-07	6.81501e-06	7.56326
7956_at	YPL202C	AFT2	-1.63188	7.42231	-6.69926	1.00707e-05	0.000163439	3.41759
4909_f_at	YGR118W	RPS23A	-1.63157	7.44419	-4.36127	0.000650343	0.00466638	-0.853432
2666_s_at	NA	NA	-1.63097	5.80643	-4.16458	0.000952318	0.00632282	-1.23999
8926_at	YNL062C	GCD10	1.63068	10.1435	5.00693	0.000191511	0.00171479	0.392487
3443_f_at	NA	NA	1.63032	7.59954	3.79786	0.00195615	0.0112151	-1.96587
7687_at	YPR067W	ISA2	-1.62966	7.03762	-4.63127	0.000387761	0.00303415	-0.327565
10923_at	YJR084W	CSN12	1.62943	11.2262	8.43338	7.32341e-07	2.00481e-05	6.11424
4228_at	YIL128W	MET18	-1.62876	6.93813	-2.04986	0.0595772	0.164494	-5.28199
7054_i_at	NA	NA	1.62742	3.99135	5.45342	8.47654e-05	0.000889084	1.22733
10037_at	YLR279W	NA	-1.62713	7.06114	-9.38792	2.0155e-07	7.31148e-06	7.43692
8491_at	YOR063W	RPL3	1.62652	6.83765	3.8072	0.00192037	0.0110454	-1.94732
8007_at	YPL243W	SRP68	1.6258	7.31539	3.18723	0.00657927	0.0302265	-3.17426
4129_at	YIL042C	NA	1.62554	10.7882	5.68853	5.57829e-05	0.000629666	1.65681
7812_at	YPL078C	ATP4	1.62536	3.97465	4.40914	0.00059303	0.00433172	-0.759755
9053_at	YNL205C	RTT106orSPS18	-1.62534	5.50943	-4.0388	0.00121761	0.00776923	-1.48838
9418_at	YMR193W	MRPL24	1.62502	6.8817	5.1484	0.000147503	0.00139507	0.659631
7848_at	YPL087W	YDC1	-1.62497	8.29037	-7.04274	5.81086e-06	0.000104921	3.98375
6846_at	YCR061W	NA	1.62404	9.81281	2.44583	0.028256	0.0941363	-4.58686
11218_at	YJL208C	NUC1	1.62391	8.77922	6.381	1.7004e-05	0.000248408	2.87839
7828_at	YPL061W	ALD6	1.6215	8.49325	7.42368	3.21603e-06	6.51229e-05	4.59275
5429_at	YFL051C	NA	1.62072	6.07491	3.96835	0.00139806	0.00862582	-1.62781
10650_at	NA	NA	-1.62069	3.51636	-5.18062	0.000139038	0.0013335	0.720137
9047_at	YNL166C	BNI5	1.62012	6.12179	3.31881	0.00506355	0.024504	-2.91532
4107_at	YIL017C	VID28	1.61939	6.39942	2.53853	0.0236245	0.0819832	-4.41661
8258_at	YOR282W	NA	1.61924	7.53437	4.68112	0.000352762	0.00280497	-0.231176
6050_at	YDR399W	HPT1	-1.6177	5.44866	-3.70579	0.00234691	0.0129866	-2.14862
11347_at	YAL020C	ATS1	-1.61688	8.07841	-3.31467	0.00510543	0.0246683	-2.92348
4218_at	YIL138C	TPM2	-1.61599	4.73521	-4.22496	0.000846774	0.00574883	-1.12107
4856_at	YGR155W	CYS4	1.61586	9.97717	4.94112	0.000216428	0.00188819	0.267449
5267_at	YGL246C	RAI1	1.61501	7.22947	8.66512	5.30472e-07	1.53584e-05	6.44527
6217_at	YDR252W	BTT1	-1.61486	8.90233	-3.54259	0.00324428	0.016872	-2.4725
9033_at	YNL181W	NA	1.61438	5.3441	3.64739	0.00263489	0.014259	-2.26456
4259_at	YIL142W	CCT2	-1.61371	10.1881	-5.46819	8.25478e-05	0.000869733	1.25453
4526_at	YHR008C	SOD2	-1.61314	8.17297	-3.81484	0.00189164	0.010907	-1.93218
10311_at	YLR015W	BRE2	1.61156	8.38781	4.33348	0.000686189	0.0048417	-0.907882
6445_at	YDR031W	NA	-1.61122	3.69569	-5.12227	0.000154759	0.00144179	0.610471
5809_i_at	YEL074W	NA	1.61036	4.38601	4.02	0.00126331	0.00800609	-1.52558
10508_at	YKR083C	DAD2	-1.61009	5.11943	-5.64494	6.0248e-05	0.000671139	1.57774
2787_at	NA	NA	-1.60971	4.29682	-2.28201	0.0386294	0.120242	-4.88131
9089_at	YNL214W	PEX17	-1.60959	3.70804	-6.82942	8.16117e-06	0.000137022	3.63405
7129_at	YBR220C	NA	1.60789	7.93315	3.22754	0.0060722	0.0283988	-3.09508
5756_at	YEL034W	HYP2	-1.60726	5.9531	-3.48396	0.00364526	0.0186356	-2.58871
11407_f_at	NA	NA	1.60633	4.32807	2.39174	0.0313463	0.101993	-4.68502
3647_f_at	NA	NA	-1.60617	5.72159	-4.73797	0.000316802	0.00258058	-0.121553
10681_at	YKL103C	LAP4	-1.60311	9.86221	-4.08004	0.00112319	0.00728121	-1.40686
6756_at	YCR020W-B	HTL1	-1.60115	2.96573	-4.96161	0.000208329	0.00183122	0.306429
8612_at	YOL040C	RPS15	-1.60093	6.38531	-4.68315	0.000351405	0.00279915	-0.227248
4458_at	YHR078W	NA	1.59868	7.57104	2.6392	0.019423	0.0707429	-4.22916
8895_at	YNL047C	SLM2	-1.59861	6.5334	-2.70414	0.0171064	0.0640033	-4.10694
9578_at	YMR047C	NUP116	-1.59819	5.90663	-2.20825	0.0443914	0.132819	-5.01089
9742_at	YML101C	CUE4	-1.59726	6.14103	-4.87306	0.000245757	0.00210519	0.137616
6074_at	YDR377W	ATP17	-1.59697	6.5451	-4.041	0.00121236	0.00774635	-1.48403
10979_at	YJR050W	ISY1	-1.59557	7.61752	-3.74216	0.0021839	0.012259	-2.07644
8898_at	YNL043C	NA	-1.59483	5.97958	-5.39929	9.34362e-05	0.000959545	1.12744
8721_at	YOL160W	NA	1.59309	4.97413	4.80063	0.000281527	0.00234667	-0.0011144
7084_at	YBR264C	YPT10	1.59249	9.00553	4.27223	0.000772555	0.00532236	-1.02811
7809_at	YPL034W	NA	1.5923	5.62448	6.54887	1.28768e-05	0.000197381	3.16455
10059_at	YLR257W	NA	-1.59201	8.70908	-3.88795	0.00163762	0.00976818	-1.78715
3512_f_at	NA	NA	1.59176	5.34936	2.27335	0.0392678	0.121742	-4.89663
7118_at	YBR253W	SRB6	-1.59106	4.22912	-4.71073	0.000333537	0.0026818	-0.174047
7912_at	YPL158C	NA	-1.58991	7.11387	-2.73923	0.0159689	0.0609543	-4.04053
3431_f_at	NA	NA	1.58846	7.49071	3.84577	0.00177961	0.0104024	-1.8708
10893_s_at	YJR145C	RPS4AorRPS4B	1.5876	7.72546	3.36588	0.00461068	0.0226769	-2.82238
10739_f_at	YKL180W	RPL17AorRPL17B	-1.58745	8.98951	-6.77142	8.96023e-06	0.000148042	3.53788
11366_at	YAL043C-A	NA	-1.58657	5.54113	-4.73697	0.000317403	0.00258322	-0.123486
3497_f_at	NA	NA	1.58622	6.9169	4.10756	0.00106437	0.00696546	-1.3525
7776_at	YPL022W	RAD1	-1.58121	5.31857	-2.19556	0.0454606	0.134927	-5.03298
7083_at	YBR263W	SHM1	1.58011	11.3309	5.3896	9.50839e-05	0.000974323	1.10952
9690_at	YML064C	TEM1	-1.58001	7.06909	-4.40576	0.000596895	0.00435654	-0.766353
6887_at	YCR010C	ADY2	-1.57932	6.87825	-3.71834	0.00228932	0.0127131	-2.12372
6035_at	YDR429C	TIF35	-1.5792	8.52347	-4.57158	0.000434425	0.003335	-0.44328
4468_at	YHR086W	NAM8	-1.57889	5.10826	-2.7645	0.0151954	0.0587223	-3.99253
11134_at	YJL115W	ASF1	-1.57806	8.39858	-3.06293	0.00842321	0.0368121	-3.41739
6029_at	YDR423C	CAD1	-1.57804	8.70805	-3.97851	0.00137043	0.00851161	-1.60769
9886_at	YLR438C-A	LSM3	1.57788	6.91544	6.22427	2.21211e-05	0.000305474	2.60768
9735_at	YML107C	NA	1.57699	8.83015	4.70478	0.00033731	0.0027098	-0.185516
5927_at	YDL048C	STP4	-1.57636	9.05008	-1.84421	0.0863963	0.215472	-5.61732
8484_at	YOR056C	NOB1	1.57465	8.17961	5.7345	5.14469e-05	0.000595114	1.73993
9358_at	YMR264W	CUE1	1.57404	5.52057	4.43004	0.000569662	0.00417409	-0.718913
8331_at	YOR220W	NA	-1.57341	8.93698	-4.96408	0.000207375	0.00182455	0.311125
3720_f_at	NA	NA	1.57148	8.00667	4.09106	0.00109925	0.00714589	-1.38509
5419_at	NA	NA	-1.57095	4.27443	-8.41604	7.5041e-07	2.04827e-05	6.08921
8410_at	YOR163W	DDP1	-1.57008	7.0127	-5.35965	0.000100369	0.00101511	1.05405
3713_s_at	NA	NA	-1.56962	5.51768	-3.09856	0.00784776	0.0347528	-3.34788
7847_at	YPL088W	NA	1.56807	8.2335	3.03783	0.00885361	0.0381929	-3.46628
10587_at	YKL020C	SPT23	-1.56695	5.36863	-2.03638	0.0610695	0.167554	-5.30458
5075_i_at	YGL076C	RPL7A	-1.5667	9.06401	-2.89612	0.0117226	0.0477446	-3.74062
7741_at	YPR033C	HTS1	1.56522	8.09099	2.97818	0.00996529	0.0419603	-3.5821
3673_f_at	NA	NA	-1.56481	3.48793	-7.08156	5.46617e-06	9.98565e-05	4.04671
11426_s_at	NA	NA	-1.56403	7.50311	-2.20215	0.0449022	0.133787	-5.02151
8543_at	YOR025W	HST3	1.56353	5.64553	3.15268	0.00704732	0.0320911	-3.24201
5531_at	YER182W	NA	1.56265	8.34688	4.06684	0.00115257	0.00745098	-1.43294
9562_at	YMR076C	PDS5	-1.56257	4.14319	-1.84181	0.0867645	0.216144	-5.6211
8846_at	YNL003C	PET8	-1.55997	5.47469	-4.53566	0.000465255	0.00353389	-0.513057
8914_at	YNL073W	MSK1	1.55785	6.63963	2.22933	0.0426678	0.129486	-4.97407
7977_at	YPL227C	ALG5	1.55779	6.0397	4.10496	0.00106978	0.00698841	-1.35763
5501_at	NA	NA	-1.55778	8.18764	-2.76037	0.0153192	0.0590225	-4.00038
4239_at	YIL163C	NA	-1.55721	3.77617	-4.05604	0.00117718	0.00756293	-1.45428
8946_at	YNL086W	NA	-1.55663	3.94792	-7.57408	2.55933e-06	5.40528e-05	4.82781
10448_s_at	YKL033W-A	NA	-1.55497	4.74956	-2.42623	0.0293405	0.0967816	-4.62252
8715_at	YOL166C	NA	-1.55422	6.05544	-4.29166	0.000744015	0.00516769	-0.98995
10080_at	YLR233C	EST1	1.55144	10.2931	3.47704	0.00369579	0.0188629	-2.60243
4904_at	YGR114C	NA	1.55138	6.2417	4.89819	0.000234477	0.00202183	0.18561
4113_at	YIL012W	NA	1.55119	3.96087	6.88814	7.42818e-06	0.000127467	3.73094
9965_at	YLR341W	SPO77	1.54931	4.5158	6.19815	2.31198e-05	0.000316457	2.56225
9864_at	YLR460C	NA	-1.54782	11.648	-8.37416	7.96028e-07	2.14438e-05	6.0286
7352_at	YBL009W	NA	1.54632	7.30468	1.2668	0.22588	0.419202	-6.4297
9581_at	YMR052W	FAR3	-1.54623	6.82331	-8.03687	1.29014e-06	3.09601e-05	5.53239
10977_at	YJR048W	CYC1	1.54444	5.6074	1.88376	0.0805177	0.204923	-5.55443
5557_at	YER164W	CHD1	-1.54311	3.44262	-3.22306	0.00612652	0.0285527	-3.10388
11130_at	YJL119C	NA	1.54303	7.21534	6.24484	2.13661e-05	0.000297452	2.64341
4923_at	YGR087C	PDC6	1.54284	11.1217	3.51769	0.00340882	0.01761	-2.52186
9748_at	YML096W	NA	1.54275	6.95601	6.08836	2.78661e-05	0.000364887	2.37018
7871_at	YPL109C	NA	1.54235	5.0371	3.03499	0.00890365	0.0383651	-3.4718
3047_at	NA	NA	1.54165	3.61943	1.84558	0.0861869	0.215136	-5.61516
10890_at	YJR142W	NA	1.5415	8.03075	7.3696	3.49376e-06	6.99876e-05	4.5075
3853_f_at	NA	NA	-1.54115	5.3519	-4.89778	0.000234659	0.00202183	0.184814
6652_at	YDL168W	SFA1	-1.53948	7.96646	-5.72137	5.26483e-05	0.000604517	1.71621
11363_at	YAL045C	NA	-1.53904	6.11355	-5.54142	7.24128e-05	0.000782111	1.38894
7573_at	YPR175W	DPB2	1.53888	4.38919	3.21646	0.00620757	0.028844	-3.11686
8970_at	YNL107W	YAF9	-1.53848	8.27426	-7.19571	4.57177e-06	8.7097e-05	4.23066
7209_at	YBR162W-A	YSY6	-1.53707	4.31242	-3.88411	0.00165006	0.00983607	-1.79476
5169_at	YGL166W	CUP2	-1.53702	7.19109	-3.07768	0.00818	0.0359343	-3.38862
9446_at	YMR176W	ECM5	1.5363	4.0322	1.71482	0.108398	0.252469	-5.81725
9345_at	YMR294W-A	NA	-1.53522	5.61657	-6.01944	3.1358e-05	0.00039881	2.24877
3394_f_at	NA	NA	1.5349	4.04179	2.34905	0.0340098	0.108838	-4.76185
5060_at	YGL047W	ALG13	1.53481	5.41321	4.75786	0.000305135	0.00249644	-0.0832802
4153_at	YIL064W	NA	-1.53386	7.13442	-6.65787	1.07722e-05	0.000171602	3.34826
10544_at	YKR027W	NA	-1.53371	10.9085	-3.62882	0.00273377	0.0147003	-2.30142
10777_at	YKL186C	MTR2	-1.5306	7.73623	-3.77988	0.00202689	0.0115232	-2.00155
10485_at	YKR104W	NA	-1.53059	8.11303	-3.98245	0.00135987	0.00849122	-1.59989
11213_at	YJL170C	ASG7	-1.52937	7.16347	-4.1911	0.000904392	0.00605197	-1.18773
9890_s_at	NA	NA	-1.52885	7.12624	-3.6014	0.00288665	0.0153276	-2.35584
9691_i_at	YML063W	RPS1BorRPS1A	-1.52758	7.98875	-3.72277	0.00226931	0.0126321	-2.11491
7970_at	YPL234C	TFP3	-1.52702	6.25764	-5.35521	0.000101179	0.00102108	1.04582
10346_at	YLR004C	NA	1.52675	7.8469	1.79706	0.0939046	0.228758	-5.69122
4510_at	YHR036W	BRL1	-1.52627	8.39035	-4.72523	0.000324517	0.00262953	-0.14609
5642_at	YER069W	ARG5,6	-1.52548	9.81834	-3.57604	0.00303571	0.0160013	-2.40615
5558_at	YER165W	PAB1	-1.5253	7.88766	-3.90653	0.00157877	0.00952668	-1.7503
9743_at	YML100W	TSL1	-1.52468	5.59996	-2.6727	0.0181922	0.0669918	-4.16622
10274_at	YLR065C	NA	-1.52066	8.57644	-4.83806	0.000262415	0.00221687	0.0706473
3529_f_at	NA	NA	1.52062	6.03082	1.98458	0.0671281	0.179759	-5.3906
3311_f_at	NA	NA	-1.52018	4.11595	-4.07284	0.00113911	0.00737721	-1.42108
10693_at	YKL135C	APL2	1.51874	7.74041	3.65053	0.00261853	0.0142253	-2.25832
7865_at	YPL115C	BEM3	-1.5186	7.04743	-2.27666	0.0390223	0.121182	-4.89077
9687_at	YML023C	NA	1.51745	8.5734	4.20069	0.000887687	0.00597014	-1.16885
10117_at	YLR225C	NA	-1.51744	8.18187	-5.09032	0.000164141	0.0015201	0.550238
3868_s_at	NA	NA	1.51685	3.18651	4.85056	0.000256337	0.00217933	0.0945714
3283_f_at	NA	NA	1.51525	7.77664	4.14946	0.000980797	0.00650266	-1.2698
8255_at	YOR279C	RFM1	-1.51455	3.92815	-3.93447	0.00149433	0.00908768	-1.69494
7632_i_at	YPR102C	NA	-1.51451	7.11242	-5.97716	3.37243e-05	0.000424254	2.17396
8833_at	YNR030W	ALG12	1.51397	6.51102	3.1348	0.0073023	0.0329627	-3.27701
4166_at	YIL051C	MMF1	-1.51204	6.18195	-3.65034	0.00261952	0.0142253	-2.2587
4281_i_at	YIL171W	NA	1.5116	7.13009	2.50267	0.0253223	0.0862401	-4.48275
7981_at	YPL223C	GRE1	-1.50966	5.59854	-3.93148	0.00150313	0.00912927	-1.70085
4797_at	YGR187C	HGH1	-1.50947	9.97978	-4.38754	0.000618218	0.00448765	-0.802001
4501_at	YHR027C	RPN1	-1.50937	3.89163	-2.7236	0.016466	0.0622057	-4.07014
4233_at	YIL123W	SIM1	1.50906	9.40981	2.88491	0.0119852	0.0486441	-3.76219
8209_at	YOR319W	HSH49	1.5083	3.86238	8.29806	8.86619e-07	2.32488e-05	5.91788
7824_at	YPL065W	VPS28	-1.50795	6.84403	-4.55606	0.000447473	0.00342671	-0.473402
10297_at	YLR045C	STU2	-1.50485	7.97384	-4.52956	0.000470711	0.00356085	-0.52492
8911_s_at	YNL030W	HHF2orHHF1	-1.50362	3.93524	-4.50335	0.000494914	0.00371683	-0.575924
11317_s_at	NA	NA	1.50207	9.45736	4.98938	0.000197849	0.0017573	0.359195
8851_at	YNR003C	RPC34	1.50057	6.29059	4.80544	0.000278993	0.00233788	0.00811263
7203_at	YBR157C	ICS2	1.49925	5.09698	3.14895	0.00709971	0.0322667	-3.2493
9083_at	YNL220W	ADE12	-1.49905	8.99353	-4.94688	0.000214121	0.0018733	0.278405
10769_at	YKL193C	SDS22	1.49825	6.15716	3.31076	0.00514527	0.0247954	-2.93119
6094_at	YDR397C	NCB2	-1.4978	5.59015	-6.79662	8.60338e-06	0.000143672	3.57972
5238_at	YGL231C	NA	-1.49748	4.95382	-3.59286	0.00293597	0.0155282	-2.37277
10616_at	YKL036C	NA	1.49628	6.9897	3.77578	0.0020434	0.0115888	-2.0097
2607_s_at	NA	NA	-1.49424	3.58735	-7.571	2.57126e-06	5.41821e-05	4.82303
3714_f_at	NA	NA	1.4931	3.97299	2.23358	0.0423278	0.128749	-4.96662
10954_at	YJR070C	LIA1	-1.49093	9.5142	-4.10814	0.00106316	0.00696546	-1.35135
9964_at	YLR340W	RPP0	1.49092	7.08049	2.78083	0.0147151	0.0572596	-3.96145
5745_at	YEL001C	NA	-1.48768	5.85602	-3.43104	0.00404994	0.0203636	-2.69352
8567_at	YOR006C	NA	-1.48756	8.39617	-5.55875	7.02108e-05	0.000764782	1.42063
5006_at	YGL011C	SCL1	-1.48703	7.592	-4.54492	0.000457094	0.00348894	-0.495052
8336_at	YOR224C	RPB8	-1.48684	5.40121	-4.9239	0.000223492	0.00194255	0.234633
3096_f_at	NA	NA	-1.48681	10.4925	-3.69803	0.00238327	0.0131722	-2.16403
4473_i_at	YHR044C	NA	-1.48591	3.7578	-3.10678	0.00772048	0.0344013	-3.3318
4712_at	YGR282C	BGL2	1.48516	7.24291	5.2155	0.000130442	0.00126709	0.785498
3594_f_at	NA	NA	1.48481	5.33296	6.52607	1.33693e-05	0.000203593	3.12592
10293_at	YLR041W	NA	-1.48341	4.35308	-5.08702	0.000165142	0.00152634	0.544019
10326_g_at	YLR029C	RPL15BorRPL15A	1.4816	6.08264	4.47619	0.000521354	0.00386872	-0.628848
9660_at	YML009C	MRPL39	-1.48131	6.289	-1.44743	0.169776	0.34521	-6.199
7161_g_at	YBR205W	KTR3	-1.48118	9.28586	-7.65161	2.27762e-06	4.95734e-05	4.9478
4743_at	YGR267C	FOL2	-1.48099	6.72835	-4.07049	0.00114436	0.00740305	-1.42573
10714_at	YKL159C	RCN1	-1.4804	6.15978	-3.49664	0.00355452	0.018291	-2.56359
4437_at	YHR100C	NA	1.4803	5.13162	3.28058	0.00546385	0.0260363	-2.99068
5743_at	YEL003W	GIM4	-1.48027	4.94075	-4.0211	0.00126057	0.00799418	-1.52339
3709_f_at	NA	NA	1.47957	5.16733	5.54782	7.15914e-05	0.000776665	1.40065
9632_at	YMR010W	NA	1.47944	6.13737	2.90989	0.0114079	0.04681	-3.7141
8277_at	YOR256C	NA	1.47844	6.04995	1.71574	0.108225	0.252256	-5.81586
10148_at	YLR168C	NA	1.47671	7.29459	5.19263	0.000136014	0.00131302	0.742657
10757_at	YKL162C	NA	1.47663	7.77209	5.82239	4.41077e-05	0.000525856	1.89806
8426_at	YOR134W	BAG7	-1.47638	7.68258	-3.15357	0.00703482	0.0320498	-3.24026
4353_at	YHR193C	EGD2	1.47588	9.13888	3.89564	0.00161301	0.00967079	-1.7719
4639_f_at	NA	NA	-1.47535	3.15416	-4.0016	0.0013097	0.00824473	-1.56197
10519_at	YKR047W	NA	-1.47476	7.5779	-4.16634	0.000949066	0.00630572	-1.23653
10365_at	YLL021W	SPA2	1.47205	3.68847	1.41044	0.18022	0.359708	-6.24814
9008_at	YNL160W	YGP1	1.47151	7.65882	3.98125	0.00136308	0.00849912	-1.60227
7810_at	YPL033C	NA	-1.47027	7.33577	-7.63423	2.33778e-06	5.05166e-05	4.92098
8205_at	YOR361C	PRT1	1.47018	4.35209	1.44918	0.169296	0.344726	-6.19665
3319_f_at	NA	NA	-1.46918	4.16361	-4.71835	0.000328763	0.00265485	-0.159348
3356_f_at	YDR543C	NA	-1.46881	5.75899	-4.81341	0.000274843	0.00230518	0.0234082
11039_at	YJL028W	NA	1.46817	6.7348	3.02562	0.00907076	0.0389313	-3.49003
4569_at	YHL039W	NA	-1.46815	7.39687	-3.26351	0.00565268	0.0267179	-3.0243
8862_at	YNR014W	NA	-1.46799	5.44485	-3.05596	0.00854054	0.0371944	-3.43096
4891_at	YGR101W	PCP1	1.46777	8.41103	3.95221	0.0014431	0.00885106	-1.65978
11385_s_at	YAL063C	FLO5orFLO9orFLO1	1.46613	7.48543	2.01832	0.0631228	0.171643	-5.33471
8529_at	YOR012W	NA	-1.46566	5.42437	-3.95119	0.00144599	0.00886298	-1.6618
9553_at	YMR068W	AVO2	1.46132	9.15872	5.61165	6.39089e-05	0.000705152	1.51717
8504_at	YOR031W	CRS5	-1.46056	5.12284	-4.38052	0.000626633	0.00453275	-0.815728
2714_s_at	NA	NA	-1.4602	9.8992	-2.72457	0.0164349	0.0621132	-4.06831
5304_at	YFR050C	PRE4	1.45771	7.75191	4.8027	0.000280432	0.00234537	0.00286283
10904_at	YJR111C	NA	-1.45766	5.63252	-3.2803	0.00546696	0.0260378	-2.99125
10770_at	YKL192C	ACP1	-1.45666	6.43889	-4.4508	0.000547381	0.00403618	-0.678369
11023_at	YJR001W	AVT1	1.45654	7.61408	2.07044	0.0573632	0.159704	-5.24735
9467_at	YMR156C	TPP1	-1.45626	6.90654	-5.16626	0.000142748	0.00135836	0.693176
5348_at	YFR006W	NA	1.45576	7.5215	2.7011	0.0172086	0.0642827	-4.11269
7911_at	YPL159C	PET20	-1.45548	6.02559	-5.59303	6.60565e-05	0.000723753	1.48324
10997_at	YJR020W	NA	1.45542	8.11303	2.96232	0.0102834	0.0430473	-3.61282
6266_at	YDR209C	NA	-1.45308	7.88535	-4.99321	0.000196448	0.00174985	0.366463
6947_g_at	NA	NA	-1.45308	10.3096	-2.47478	0.0267236	0.0899621	-4.53395
7648_at	YPR116W	NA	1.45202	8.954	4.50599	0.000492419	0.00370107	-0.570783
3742_f_at	NA	NA	-1.45137	3.62709	-6.83602	8.07517e-06	0.000135968	3.64495
6370_at	YDR091C	RLI1	1.45087	6.05172	2.13595	0.0508112	0.147122	-5.1359
3413_f_at	NA	NA	1.4505	7.22337	4.83208	0.000265375	0.00223782	0.0591959
9862_at	YLR458W	NA	1.44926	7.23927	3.11356	0.00761721	0.0340223	-3.31856
11292_at	YAR030C	NA	1.44926	4.16111	6.23444	2.17443e-05	0.000301162	2.62535
8680_at	YOL108C	INO4	-1.44846	4.66374	-2.83447	0.01324	0.0529089	-3.85901
3652_f_at	NA	NA	1.44838	3.73605	2.14148	0.0502914	0.146161	-5.12641
4772_at	YGR252W	GCN5	1.44723	5.95005	2.81297	0.0138131	0.0546611	-3.90014
7281_at	YBR100W	MMS4	-1.44587	5.51306	-4.06594	0.00115458	0.00745873	-1.43471
2354_at	NA	NA	-1.44556	7.5321	-5.77618	4.78188e-05	0.000561495	1.81506
6391_at	YDR067C	NA	-1.44534	6.45361	-4.71469	0.000331048	0.00266638	-0.166409
6592_at	YDL094C	NA	-1.44512	6.48657	-4.94264	0.000215819	0.00188493	0.27033
3482_f_at	NA	NA	1.44375	5.31206	5.1236	0.000154381	0.00144174	0.612975
7282_at	YBR101C	FES1	-1.4435	7.80176	-4.35841	0.000653933	0.00467899	-0.85902
4057_at	YIR021W	MRS1	1.44255	7.82206	2.9111	0.0113805	0.0467182	-3.71176
4979_at	YGR007W	MUQ1	-1.44214	8.5444	-4.48453	0.000513087	0.00381951	-0.612596
4566_at	YHL042W	NA	-1.44141	5.8475	-3.60316	0.00287654	0.0153093	-2.35233
6373_g_at	NA	NA	-1.44051	8.05965	-3.69762	0.00238519	0.013175	-2.16484
4710_at	YGR280C	PXR1	-1.43981	8.34175	-2.1598	0.0486038	0.142186	-5.09489
4535_at	YHR016C	YSC84	-1.43959	6.79956	-4.54121	0.000460345	0.00350802	-0.502263
6207_at	YDR287W	NA	1.43923	8.39077	3.27024	0.00557747	0.026413	-3.01105
5133_at	YGL109W	NA	-1.43839	6.33541	-4.61068	0.000403241	0.00312646	-0.367437
11232_at	YJL194W	CDC6	-1.43716	6.53724	-2.75593	0.0154535	0.0594146	-4.00883
9042_at	YNL171C	NA	-1.43702	5.15849	-3.31395	0.0051127	0.0246907	-2.92489
5782_at	YEL053C	MAK10	1.43671	5.41794	3.02197	0.00913663	0.0391427	-3.49712
10139_i_at	YLR202C	NA	-1.43641	8.22589	-4.82095	0.000270978	0.00227685	0.0378634
5030_at	YGL032C	AGA2	-1.43573	4.15931	-4.1155	0.001048	0.0068895	-1.33683
7431_at	YBL065W	NA	-1.434	6.187	-4.41633	0.000584879	0.00427887	-0.745695
5310_at	YFR055W	NA	-1.43304	8.18704	-5.93651	3.61761e-05	0.00044729	2.10181
9475_at	YMR163C	NA	-1.43293	7.75977	-3.52998	0.0033266	0.0172521	-2.49751
3528_f_at	NA	NA	-1.43221	3.72613	-6.08776	2.78946e-05	0.000364887	2.36913
3424_f_at	NA	NA	1.43213	3.90731	2.29324	0.0378166	0.118277	-4.86141
10503_at	YKR078W	NA	1.43204	7.88363	3.50919	0.00346695	0.0178906	-2.53872
11118_at	YJL084C	NA	-1.43094	8.39062	-1.50148	0.155428	0.325537	-6.12553
9619_at	YMR041C	NA	-1.43031	9.33713	-5.71097	5.36204e-05	0.000613415	1.69742
3359_f_at	NA	NA	-1.42973	3.79728	-6.0857	2.79927e-05	0.000365471	2.36552
10191_at	YLR166C	SEC10	1.42962	5.37698	2.01434	0.063583	0.172622	-5.34132
5309_at	YFR056C	NA	1.42951	5.48249	6.34875	1.79449e-05	0.000259312	2.82296
9669_at	YML041C	VPS71	-1.42905	7.79517	-3.59774	0.00290767	0.0154135	-2.36309
5989_at	YDR475C	NA	-1.42812	6.74301	-3.74553	0.00216937	0.0121921	-2.06974
6349_at	YDR114C	NA	1.42798	6.27118	3.48702	0.00362317	0.0185531	-2.58266
6382_at	YDR102C	NA	-1.42796	4.4548	-3.72562	0.00225655	0.0125761	-2.10926
3579_f_at	NA	NA	1.42743	7.56428	3.63332	0.00270944	0.0146116	-2.29248
3530_f_at	NA	NA	-1.4267	3.80747	-4.77899	0.000293223	0.0024331	-0.0426533
2809_at	NA	NA	1.42658	3.43752	3.90028	0.00159833	0.00960749	-1.7627
8324_at	YOR213C	SAS5	-1.42491	8.42301	-4.82097	0.00027097	0.00227685	0.0378964
7347_at	YBR033W	NA	-1.42465	7.41434	-1.48043	0.160889	0.333237	-6.15437
5955_at	YDR531W	NA	1.4229	9.33064	8.19218	1.0312e-06	2.59468e-05	5.76266
10692_at	YKL136W	NA	1.4224	7.61786	7.18432	4.65363e-06	8.8296e-05	4.21239
8860_at	YNR012W	URK1	1.42231	8.2714	5.64995	5.97162e-05	0.000666807	1.58684
10653_at	YKL086W	SRX1	-1.42205	7.81413	-3.55253	0.0031808	0.0166346	-2.45278
9688_at	YML022W	APT1	1.42136	6.55183	6.31193	1.90862e-05	0.000272015	2.75951
2200_at	NA	NA	1.4205	5.38947	1.46005	0.166332	0.340283	-6.18203
6634_at	YDL141W	BPL1	1.41985	7.88921	3.79633	0.00196208	0.0112309	-1.96891
8269_f_at	YOR293W	RPS10A	-1.41973	5.66817	-6.19154	2.33802e-05	0.000319553	2.55072
10342_at	YLL001W	DNM1	-1.41914	7.77557	-3.11487	0.00759734	0.0339824	-3.31599
6902_at	YCL030C	HIS4	1.41858	10.3536	2.19647	0.045383	0.134792	-5.03139
3236_f_at	NA	NA	1.41839	3.72962	2.13938	0.0504886	0.146461	-5.13002
9116_at	YNL232W	CSL4	-1.41796	7.57772	-2.73757	0.016021	0.0610431	-4.04368
5630_at	YER099C	PRS2	-1.41745	7.9324	-3.18454	0.00661454	0.0303424	-3.17953
7446_at	YBL094C	NA	1.417	7.34144	4.34685	0.000668694	0.00475058	-0.881675
3279_f_at	NA	NA	1.41696	4.22389	2.12199	0.052147	0.149871	-5.15981
6218_at	YDR253C	MET32	1.41609	7.02911	4.56931	0.000436302	0.0033439	-0.447669
4067_at	YIR031C	DAL7	1.41385	9.32701	3.9198	0.00153807	0.0093112	-1.724
6422_at	YDR053W	NA	-1.41384	8.48909	-3.88801	0.00163742	0.00976818	-1.78703
6354_at	YDR119W	NA	-1.41377	7.70485	-2.04949	0.0596168	0.164549	-5.2826
11327_at	YAR007C	RFA1	1.41358	10.0385	3.42363	0.00411006	0.0206387	-2.70818
7228_at	YBR137W	NA	-1.41344	7.69311	-4.05837	0.00117184	0.0075371	-1.44969
10897_at	YJR104C	SOD1	-1.41321	4.337	-6.96638	6.55751e-06	0.000115065	3.85929
5598_at	YER113C	NA	1.41094	7.62083	1.64466	0.122279	0.27512	-5.92171
6948_i_at	NA	NA	-1.41058	3.1401	-3.33849	0.00486896	0.0237098	-2.87647
9012_at	YNL156C	NA	-1.41052	5.92784	-3.03224	0.00895232	0.0385115	-3.47715
9499_at	YMR144W	NA	1.40944	7.80363	3.17525	0.00673788	0.0308626	-3.19775
3131_g_at	NA	NA	1.40943	4.34575	3.15413	0.00702697	0.0320297	-3.23916
10629_at	YKL067W	YNK1	-1.40927	7.51202	-4.65733	0.000369034	0.00291203	-0.277134
3813_f_at	NA	NA	1.40924	5.15822	6.77794	8.86644e-06	0.000147051	3.54871
6956_s_at	YCL074W	NA	1.40837	6.7646	3.30183	0.00523762	0.0251508	-2.94881
6537_f_at	YDL061C	RPS29AorRPS29B	-1.40799	4.87433	-5.75496	4.96313e-05	0.000578359	1.77684
8572_at	YOL035C	NA	-1.40655	4.94172	-4.7433	0.000313634	0.00255994	-0.111304
7699_at	YPR036W	VMA13	-1.40392	10.3308	-5.18609	0.000137651	0.00132471	0.730406
8088_i_at	NA	NA	-1.40363	3.71205	-4.38392	0.000622549	0.00451553	-0.809088
7770_at	YPL028W	ERG10	-1.40294	7.611	-5.54096	7.2472e-05	0.000782111	1.3881
5962_at	YDR493W	NA	-1.40281	4.9532	-3.53047	0.00332338	0.017245	-2.49654
8780_at	YNR068C	NA	1.40235	7.25279	4.90276	0.000232486	0.00201136	0.194319
6159_at	YDR327W	NA	-1.40233	7.5047	-5.13843	0.000150229	0.00141656	0.640881
10248_at	YLR084C	RAX2	-1.40197	6.19295	-2.18283	0.0465569	0.137274	-5.05507
8308_at	YOR242C	SSP2	-1.40063	9.4587	-7.49203	2.89788e-06	6.0115e-05	4.69996
4774_at	YGR209C	TRX2	-1.40051	5.48426	-4.8455	0.000258777	0.00219209	0.0848986
4151_at	YIL067C	NA	1.40025	7.95111	2.50146	0.0253818	0.0863479	-4.48498
3308_s_at	NA	NA	1.39957	7.05507	1.67287	0.116522	0.266275	-5.88005
4097_at	YIR016W	NA	1.39884	6.54312	2.96772	0.010174	0.0427045	-3.60237
6687_at	YDL220C	CDC13	-1.39589	6.11705	-4.30789	0.000720994	0.00503365	-0.958075
2806_s_at	NA	NA	1.39382	8.60236	2.59397	0.0212127	0.0758119	-4.31368
3222_f_at	NA	NA	1.39328	6.61316	3.49065	0.00359713	0.0184566	-2.57547
8817_at	YNR058W	BIO3	1.39279	10.6236	6.60646	1.17158e-05	0.000182582	3.26182
8823_at	YNR020C	NA	-1.39267	8.51414	-6.17715	2.39576e-05	0.000323653	2.52563
9969_at	YLR345W	NA	-1.39236	10.4546	-4.2465	0.000812087	0.00554154	-1.07869
9182_s_at	YNL302C	RPS19BorRPS19A	-1.39094	9.42104	-3.97014	0.00139314	0.00861256	-1.62426
5660_at	YER048W-A	NA	-1.38959	4.15413	-5.06468	0.000172094	0.00157809	0.501829
10246_at	YLR082C	SRL2	-1.38957	9.30405	-7.30901	3.83523e-06	7.52141e-05	4.41151
4512_at	YHR038W	RRF1	-1.38915	6.14699	-4.52661	0.000473375	0.0035752	-0.530661
7294_at	YBR071W	NA	1.38831	5.86998	3.49639	0.00355631	0.018291	-2.56409
8487_at	YOR059C	NA	1.38668	9.06746	3.04449	0.00873733	0.0378307	-3.45331
11318_at	NA	NA	1.386	5.35629	4.37607	0.000632033	0.00455953	-0.82444
3779_f_at	NA	NA	1.38518	7.49667	4.34192	0.00067509	0.00478509	-0.891335
8294_at	YOR273C	TPO4	-1.38494	6.77904	-2.1573	0.0488307	0.142761	-5.09919
2204_s_at	NA	NA	1.3846	6.37074	2.51701	0.0246297	0.0844975	-4.45634
2822_at	NA	NA	-1.38412	5.86156	-3.37625	0.00451649	0.0223283	-2.80189
4034_at	YIR020W-B	NA	-1.38347	6.01745	-3.26748	0.00560818	0.0265344	-3.01649
6055_at	YDR404C	RPB7	-1.38274	6.23143	-4.69313	0.000344826	0.00276305	-0.207983
10754_at	YKL165C	MCD4	1.38269	6.9014	1.31449	0.209792	0.398013	-6.3711
9306_at	YMR300C	ADE4	-1.38213	5.42185	-4.7629	0.000302252	0.00247944	-0.0735951
5985_at	YDR471W	RPL27B	-1.3816	8.36713	-3.8165	0.00188544	0.010878	-1.92888
6642_at	YDL178W	DLD2	1.38076	10.1978	4.61486	0.000400048	0.00310428	-0.359341
4956_at	YGR028W	MSP1	-1.38058	8.51161	-3.08215	0.00810772	0.0356503	-3.3799
8405_at	YOR158W	PET123	1.37934	4.38567	2.36588	0.0329357	0.106092	-4.73165
9314_at	YMR306C-A	NA	1.37798	5.62236	4.71664	0.000329828	0.00265884	-0.162644
5614_at	YER086W	ILV1	1.37753	7.19946	3.86479	0.0017141	0.0101209	-1.83308
9981_at	YLR358C	NA	1.37707	6.88995	4.86998	0.000247179	0.00211109	0.131722
9409_at	YMR226C	NA	-1.37641	8.59751	-4.76352	0.000301896	0.00247944	-0.0723938
8804_at	YNR046W	TRM112	-1.37639	6.99921	-3.22606	0.00609007	0.0284373	-3.09798
5018_at	YGR001C	NA	-1.37568	4.59634	-4.7248	0.000324783	0.00262953	-0.146927
6003_at	YDR442W	NA	-1.37388	5.09943	-3.27255	0.00555189	0.0263214	-3.0065
6695_at	YDL213C	NOP6	-1.37385	6.57161	-5.25627	0.000121088	0.00118873	0.861718
10907_at	YJR114W	NA	1.37125	7.64169	4.31243	0.000714692	0.00500499	-0.94917
5651_at	YER078C	NA	1.37005	7.00803	3.25081	0.00579745	0.0273329	-3.04931
9535_at	YMR093W	UTP15	1.36862	9.26709	4.35365	0.000659977	0.00471016	-0.868357
5689_at	YER034W	NA	-1.36682	6.19374	-2.99119	0.00971171	0.0410593	-3.55689
9158_at	YNL281W	HCH1	-1.3663	6.17355	-4.33379	0.000685786	0.0048417	-0.907286
6213_at	YDR248C	NA	-1.36623	4.43177	-4.19735	0.000893461	0.00600033	-1.17542
11229_at	YJL197W	UBP12	1.36436	4.45294	2.06211	0.0582502	0.161642	-5.2614
8240_at	YOR305W	NA	1.36428	5.26006	4.7756	0.000295105	0.00244437	-0.0491812
8227_at	YOR337W	TEA1	1.36377	7.47584	1.54294	0.145123	0.309916	-6.06785
7693_at	YPR073C	LTP1	-1.3626	4.70647	-4.61502	0.000399927	0.00310428	-0.359033
10554_at	YKR037C	SPC34	1.36222	5.80858	2.74451	0.015804	0.0604383	-4.0305
10792_at	YKL220C	FRE2	1.36061	7.1759	1.59646	0.132685	0.291439	-5.99176
10565_at	YKR002W	PAP1	1.35928	7.382	0.977987	0.344664	0.551309	-6.74621
9362_at	YMR268C	PRP24	-1.3591	5.84582	-2.22283	0.0431921	0.130606	-4.98543
10262_at	YLR053C	NA	-1.35897	4.36709	-3.97137	0.00138979	0.00860323	-1.62183
6338_at	YDR147W	EKI1	-1.35877	9.91308	-4.72721	0.000323306	0.0026244	-0.142278
4092_at	YIR011C	STS1	-1.35815	10.0227	-3.13826	0.00725226	0.0327844	-3.27024
3700_f_at	NA	NA	1.35768	3.65871	2.47109	0.0269141	0.0905381	-4.5407
8300_f_at	YOR234C	RPL33AorRPL33B	-1.35708	7.81686	-4.37184	0.000637217	0.00458983	-0.832734
6911_at	YCL016C	DCC1	-1.35647	8.92122	-3.18696	0.00658281	0.0302265	-3.17479
8029_at	YPL266W	DIM1	1.35545	8.4866	4.02628	0.00124785	0.00792968	-1.51315
10368_s_at	YLL020C	KNS1	-1.35474	6.54878	-4.85554	0.000253956	0.00216106	0.104102
6256_at	YDR199W	NA	-1.35346	7.60918	-3.44493	0.00393954	0.0199197	-2.66602
11151_at	YJL142C	YAK1	1.35267	5.18407	3.57135	0.0030641	0.0161236	-2.41545
8848_at	YNL001W	DOM34	-1.35255	5.29724	-4.32772	0.000693867	0.00487745	-0.919172
11374_at	YAL035W	FUN12	-1.35197	6.95324	-2.89139	0.0118328	0.0481513	-3.74973
3723_f_at	NA	NA	1.35103	7.82306	3.96648	0.00140319	0.00864601	-1.63151
9597_at	YMR067C	UBX4	1.34986	5.99499	3.61692	0.00279908	0.0149911	-2.32504
11157_at	YJL137C	GLG2	-1.34913	9.34282	-6.85928	7.77943e-06	0.00013252	3.68337
11090_at	YJL067W	NA	1.34909	8.11387	5.01	0.000190422	0.00171086	0.398319
6239_at	YDR228C	PCF11	-1.34882	3.6777	-7.41297	3.26913e-06	6.59121e-05	4.5759
8191_at	YOR347C	PYK2	1.34851	9.86105	6.20666	2.27893e-05	0.00031285	2.57706
7342_at	YBR029C	CDS1	-1.34751	7.95548	-3.80999	0.00190984	0.0109984	-1.9418
9892_at	YLR443W	ECM7	1.3474	7.28102	4.05468	0.00118033	0.00757798	-1.45699
5237_at	YGL232W	TAN1	-1.34638	6.80845	-3.76948	0.00206899	0.0117197	-2.02219
9331_at	YMR282C	AEP2	-1.34615	9.85972	-2.84274	0.0130256	0.0521416	-3.84316
10085_at	YLR237W	THI7	-1.34612	10.7381	-2.39846	0.0309457	0.101042	-4.67287
11093_at	YJL064W	NA	1.34538	6.09778	3.81398	0.00189486	0.0109188	-1.93389
10578_at	YKR015C	NA	1.34532	5.69412	3.56298	0.00311548	0.0163409	-2.43206
4548_at	YHL014C	YLF2	-1.34496	7.51162	-3.89193	0.00162481	0.00971662	-1.77924
8260_at	YOR284W	HUA2	-1.3444	6.65281	-2.62108	0.0201217	0.0726725	-4.26308
10509_at	YKR084C	HBS1	-1.34396	7.07223	-3.52807	0.00333925	0.0173081	-2.50129
6533_at	YDL065C	PEX19	1.34365	7.02226	6.6707	1.05494e-05	0.000169499	3.36978
10510_at	YKR038C	KAE1	-1.34337	6.13078	-3.11797	0.00755073	0.0338225	-3.30993
6385_at	YDR105C	TMS1	1.34308	6.72687	2.69617	0.0173757	0.0647548	-4.122
8306_at	YOR240W	ABP140	1.34289	8.78822	5.02366	0.000185663	0.00167618	0.424198
3395_f_at	NA	NA	1.34244	5.73119	4.36691	0.000643303	0.00462297	-0.842384
7217_at	YBR126C	TPS1	1.34166	9.80285	3.476	0.00370344	0.0188813	-2.60449
3525_f_at	NA	NA	1.34041	7.05002	4.23988	0.00082259	0.00559685	-1.09171
5092_at	YGL105W	ARC1	-1.34038	8.55374	-4.3777	0.000630049	0.00454873	-0.821248
6061_at	YDR410C	STE14	1.34029	6.81402	3.83526	0.00181689	0.0105806	-1.89165
9126_at	YNL268W	LYP1	-1.33932	7.96685	-3.23799	0.00594726	0.0279264	-3.07454
8842_at	YNR039C	ZRG17	1.33912	8.01466	3.14305	0.00718348	0.0325124	-3.26086
8231_at	YOR298C-A	MBF1	-1.33837	4.54738	-2.5057	0.0251745	0.0859561	-4.47717
5163_at	YGL172W	NUP49	-1.33819	6.64885	-1.97018	0.0689083	0.18316	-5.4143
6118_at	YDR332W	NA	-1.33709	7.66307	-1.38367	0.188105	0.369616	-6.28311
8002_at	YPL248C	GAL4	-1.33691	4.19177	-2.03461	0.0612676	0.167919	-5.30753
10053_at	YLR293C	GSP1	1.3366	6.36803	2.84911	0.0128631	0.0516808	-3.83096
3774_f_at	NA	NA	1.33583	4.68961	5.56124	6.99002e-05	0.000762287	1.42518
8372_at	YOR170W	NA	-1.33552	7.0158	-3.98062	0.00136478	0.00849912	-1.60352
5718_at	YER018C	SPC25	-1.33431	7.58495	-3.03535	0.00889719	0.0383627	-3.47109
7313_at	YBR045C	GIP1	1.33404	8.96438	3.45606	0.00385328	0.0195173	-2.64398
8677_at	YOL111C	NA	1.33343	7.38959	3.27391	0.00553692	0.0262905	-3.00383
7220_at	YBR129C	OPY1	1.33283	6.57017	4.63207	0.000387172	0.00303209	-0.326016
3672_f_at	NA	NA	1.3319	3.76854	2.21803	0.0435839	0.131264	-4.99383
8647_at	YOL096C	COQ3	1.33075	9.82071	4.5012	0.000496958	0.00372918	-0.580115
8701_at	YOL133W	HRT1	-1.33061	4.85368	-3.23145	0.00602518	0.0282354	-3.0874
9614_at	YMR036C	MIH1	-1.33035	7.57301	-1.60516	0.130752	0.288449	-5.97922
6451_at	YDR036C	EHD3	-1.33008	8.50986	-3.93965	0.00147918	0.00901314	-1.68467
4349_at	YHR189W	PTH1	1.32996	6.32816	4.34087	0.000676467	0.00479122	-0.893403
7863_at	YPL117C	IDI1	1.32984	7.36764	3.18707	0.00658131	0.0302265	-3.17456
11235_at	YJL191W	RPS14BorRPS14A	-1.32899	7.83999	-5.20247	0.000133587	0.00129227	0.761094
9958_at	YLR377C	FBP1	-1.32771	6.63464	-2.8973	0.0116954	0.0476546	-3.73836
6000_at	YDR486C	VPS60	-1.3277	8.13899	-3.21804	0.00618809	0.0287965	-3.11375
6650_at	YDL170W	UGA3	1.32739	9.97969	5.83398	4.32249e-05	0.000518643	1.91884
9382_at	YMR243C	ZRC1	-1.32702	9.98986	-6.57783	1.22786e-05	0.000189872	3.21352
11284_f_at	NA	NA	-1.3268	4.06652	-2.94533	0.0106353	0.0441851	-3.64569
6255_at	YDR198C	NA	-1.32647	8.81595	-5.23192	0.000126586	0.00123349	0.816229
10932_at	YJR094C	IME1	-1.32625	7.77219	-3.40669	0.00425099	0.0212436	-2.7417
11164_at	YJL131C	NA	-1.32621	7.69677	-3.66484	0.00254527	0.01394	-2.22991
8451_at	YOR114W	NA	-1.32597	7.81307	-5.86179	4.11815e-05	0.000497321	1.96861
4803_at	YGR193C	PDX1	-1.32522	9.63395	-2.70134	0.0172004	0.0642776	-4.11222
8447_at	YOR110W	TFC7	1.32512	8.90522	5.31185	0.000109448	0.00108691	0.965286
6044_at	YDR437W	NA	1.32465	6.19117	4.48929	0.000508432	0.00379697	-0.603328
8905_at	YNL036W	NCE103	-1.32449	4.78604	-2.32743	0.0354399	0.112489	-4.80056
6022_at	YDR462W	MRPL28	-1.32439	6.42149	-5.05874	0.000173993	0.00158541	0.490601
4087_at	YIR006C	PAN1	-1.3239	7.50007	-2.39374	0.0312271	0.101765	-4.68142
3426_f_at	NA	NA	1.32276	7.31011	4.18172	0.00092105	0.00614582	-1.2062
9740_at	YML102W	CAC2	1.32224	10.5916	2.96017	0.0103273	0.0430959	-3.61698
8513_at	YOR040W	GLO4	1.32182	6.68611	4.51248	0.000486344	0.00366426	-0.558156
9769_g_at	YML117W	NAB6	1.32174	6.30041	1.99639	0.0657008	0.176545	-5.3711
11139_at	YJL108C	PRM10	-1.32144	8.46545	-4.44148	0.000557269	0.00409615	-0.696564
7997_at	YPL252C	YAH1	-1.32059	8.33999	-3.30104	0.00524577	0.0251659	-2.95035
6683_g_at	YDL182W	LYS20orLYS21	-1.32016	9.45785	-4.6904	0.000346616	0.00277159	-0.213259
3526_f_at	NA	NA	1.31993	7.37167	4.26132	0.000789062	0.00541212	-1.04954
11299_at	YAR044W	SWH1	-1.31941	6.26076	-2.45935	0.0275299	0.092264	-4.56217
5369_at	YFL017C	GNA1	-1.31938	5.71439	-5.41447	9.09158e-05	0.000939866	1.15549
6939_g_at	NA	NA	1.31934	8.90394	4.80317	0.000280187	0.00234537	0.00375508
10374_at	YLL056C	NA	1.31929	9.07754	4.02142	0.00125978	0.00799418	-1.52276
11115_at	YJL087C	TRL1	-1.3186	3.82591	-5.34914	0.000102296	0.00103014	1.03456
11425_s_at	NA	NA	-1.31782	7.14071	-2.16148	0.0484516	0.141791	-5.09199
10253_at	YLR089C	NA	1.31703	9.74693	3.96217	0.00141512	0.00869857	-1.64004
8461_at	YOR080W	DIA2	1.31688	6.93934	1.51219	0.152707	0.321208	-6.11073
9501_at	YMR146C	TIF34	1.31464	8.27766	4.39369	0.000610933	0.00444762	-0.789963
4724_i_at	YGR122C-A	NA	-1.3133	6.35979	-3.06379	0.00840892	0.0367669	-3.41572
5170_at	YGL165C	NA	-1.31288	7.04741	-2.49988	0.0254595	0.086581	-4.48789
6501_at	YDL006W	PTC1	-1.31241	8.38256	-5.16399	0.000143343	0.00136263	0.688919
6222_at	YDR257C	SET7	-1.31155	6.90783	-7.27194	4.0614e-06	7.88215e-05	4.35252
6847_g_at	YCR061W	NA	1.31135	10.2098	2.78311	0.0146494	0.0571229	-3.95711
3758_f_at	NA	NA	1.31128	5.64412	5.82888	4.36113e-05	0.000521938	1.90969
3289_i_at	NA	NA	-1.3102	3.20607	-6.14425	2.53339e-05	0.000339673	2.46817
6543_at	YDL055C	PSA1	1.30815	10.1137	4.20779	0.000875504	0.00591377	-1.15486
4749_at	YGR273C	NA	-1.30633	4.84336	-3.69351	0.00240469	0.0132592	-2.173
9135_at	YNL259C	ATX1	-1.30543	4.2759	-4.62567	0.000391904	0.00305852	-0.338391
10772_at	YKL190W	CNB1	-1.30443	8.16579	-3.05095	0.00862603	0.0374705	-3.44074
3950_at	YNL180C	RHO5	-1.30304	6.50766	-3.05832	0.00850063	0.0370651	-3.42637
3637_f_at	NA	NA	1.30236	5.40026	2.43968	0.0285921	0.0950525	-4.59806
4717_at	YGR287C	NA	-1.30193	8.85421	-4.55353	0.000449647	0.00343772	-0.478335
10985_at	YJR056C	NA	1.30056	6.80392	2.60042	0.0209483	0.0750623	-4.30167
5422_s_at	YFL067W	NA	-1.30031	9.96792	-5.0596	0.000173717	0.00158519	0.492226
8335_at	YOR223W	NA	-1.30023	9.3657	-4.14316	0.000992935	0.00656448	-1.28225
10604_at	YKL048C	ELM1	-1.29953	6.6509	-2.23779	0.0419935	0.127982	-4.95924
10895_at	YJR147W	HMS2	-1.29915	6.21334	-2.66282	0.0185473	0.0679777	-4.18482
10537_at	YKR020W	VPS51	-1.29886	3.70349	-6.08746	2.79089e-05	0.000364887	2.3686
10146_at	YLR208W	SEC13	1.29827	8.92728	4.48521	0.000512419	0.00381951	-0.611271
6192_at	YDR272W	GLO2	-1.2981	7.45906	-4.30754	0.000721481	0.00503365	-0.95876
4951_at	YGR070W	ROM1	-1.29766	3.72375	-2.69402	0.017449	0.0649208	-4.12606
6499_at	YDL008W	APC11	-1.29741	6.54909	-3.82754	0.00184478	0.0107029	-1.90696
3498_f_at	NA	NA	1.29654	7.07406	3.93732	0.00148597	0.00904865	-1.68929
6693_at	YDL215C	GDH2	-1.29639	8.88885	-1.69859	0.11148	0.257209	-5.84166
10798_at	YKL214C	YRA2	-1.29561	8.39928	-3.97427	0.00138189	0.00856004	-1.61609
6555_at	YDL086W	NA	-1.2942	10.1309	-4.1624	0.00095637	0.00634521	-1.24429
3371_f_at	NA	NA	1.29372	5.34207	5.70476	5.42101e-05	0.000617889	1.68619
4823_at	YGR168C	NA	1.29306	7.06035	2.01422	0.0635974	0.172622	-5.34153
8719_at	YOL162W	NA	1.29252	5.24548	5.34056	0.000103898	0.00104401	1.01863
11302_at	YAR053W	NA	1.29205	5.41984	4.24927	0.000807736	0.00551588	-1.07325
5625_at	YER094C	PUP3	1.29175	6.47572	2.43446	0.0288807	0.0957051	-4.60757
7608_at	YPR122W	AXL1	1.29019	5.40296	2.33306	0.0350619	0.111469	-4.79049
7265_at	YBR087W	RFC5	-1.28982	5.58659	-5.43487	8.76376e-05	0.000913923	1.19315
4737_at	YGR261C	APL6	-1.28981	8.41211	-2.31297	0.036427	0.114919	-4.82633
10290_at	YLR038C	COX12	-1.28942	6.12258	-3.77612	0.00204201	0.0115888	-2.00901
7823_at	YPL066W	NA	-1.28887	6.50721	-3.22709	0.0060776	0.0284098	-3.09596
9927_at	YLR392C	NA	-1.28859	6.60662	-2.86625	0.0124353	0.0502092	-3.79807
7620_at	YPR133C	IWS1	-1.28709	9.81094	-6.70991	9.89821e-06	0.000161538	3.43538
4540_at	YHL022C	SPO11	-1.28706	7.75237	-5.97563	3.38131e-05	0.000424254	2.17126
5217_at	YGL208W	SIP2	-1.28668	6.95943	-3.60663	0.00285685	0.015248	-2.34546
5563_at	YER170W	ADK2	1.28644	5.74669	3.11239	0.00763499	0.0340561	-3.32085
5399_at	YFL032W	HAC1	-1.28638	6.8705	-2.85618	0.0126849	0.0510844	-3.8174
10313_at	YLR017W	MEU1	-1.28618	10.2668	-5.385	9.58771e-05	0.000978956	1.101
9925_at	YLR390W	ECM19	-1.28483	6.21966	-3.65439	0.00259859	0.0141445	-2.25067
8148_at	YOL013W-A	NA	-1.28425	6.28579	-3.07597	0.00820791	0.0360399	-3.39196
8583_at	YOL024W	NA	-1.28399	6.70918	-4.77654	0.000294581	0.0024422	-0.0473695
4846_at	YGR146C	NA	-1.28398	7.91623	-4.37278	0.000636064	0.00458507	-0.830895
2814_at	NA	NA	-1.28285	4.74174	-4.53023	0.000470108	0.00355917	-0.523616
7149_at	YBR193C	MED8	-1.28259	8.05139	-3.78839	0.00199308	0.0113954	-1.98466
7147_at	NA	NA	-1.28217	9.068	-3.00348	0.00947788	0.0402713	-3.53303
10713_at	YKL116C	PRR1	-1.2815	6.88788	-2.51138	0.0248995	0.0851728	-4.46671
9453_at	YMR183C	SSO2	-1.28126	8.18365	-3.62825	0.00273684	0.0147083	-2.30254
10074_at	YLR269C	NA	-1.28048	4.53807	-4.99636	0.000195304	0.00174299	0.372431
4857_at	YGR156W	PTI1	-1.27995	8.78214	-5.64511	6.02295e-05	0.000671139	1.57805
9939_at	YLR404W	NA	1.27963	8.3072	3.27096	0.00556948	0.0263914	-3.00963
8658_at	YOL085C	NA	-1.27959	6.08878	-3.98164	0.00136204	0.00849912	-1.6015
3180_f_at	NA	NA	1.27503	3.69884	2.45615	0.0277001	0.0926813	-4.56802
10542_at	YKR025W	RPC37	-1.27427	7.64547	-4.9951	0.00019576	0.00174539	0.370049
10013_at	YLR298C	YHC1	1.27374	5.34572	3.12403	0.00746039	0.0335304	-3.29809
7786_at	YPL012W	RRP12	-1.27369	3.71045	-3.15916	0.00695701	0.0317418	-3.2293
5644_at	YER071C	NA	-1.27256	5.35529	-3.45818	0.00383708	0.0194458	-2.63979
10583_at	YKL024C	URA6	-1.27192	8.3255	-2.54138	0.0234942	0.0817124	-4.41134
7080_at	YBR260C	RGD1	-1.27187	12.7724	-6.03292	3.06403e-05	0.000393435	2.27258
7386_at	YBL021C	HAP3	-1.2718	7.98376	-3.78329	0.00201327	0.0114527	-1.99478
7785_at	YPL013C	MRPS16	-1.2718	7.81442	-4.03367	0.00122991	0.00783168	-1.49854
3327_f_at	YFL062W	COS3orCOS1orCOS6orCOS4orCOS2	-1.2718	11.1229	-6.8434	7.97998e-06	0.000134951	3.65716
3189_i_at	YHL048W	COS8	1.27089	9.43338	1.19019	0.253748	0.452122	-6.52021
7155_at	YBR199W	KTR4	1.2703	7.95015	3.0091	0.00937278	0.0399156	-3.52212
7635_at	YPR104C	FHL1	-1.26974	5.71062	-6.20379	2.29004e-05	0.000313913	2.57206
10525_at	YKR053C	YSR3	-1.26963	7.00566	-2.29581	0.037633	0.117848	-4.85685
3235_f_at	NA	NA	-1.26912	3.78155	-3.46604	0.00377756	0.0192067	-2.62422
3879_f_at	NA	NA	-1.26883	4.01661	-5.39208	9.46595e-05	0.00097104	1.11411
11105_at	YJL097W	NA	-1.26781	6.66795	-1.87307	0.0820703	0.207735	-5.57151
6901_at	YCL031C	RRP7	-1.26744	6.29747	-3.84075	0.00179732	0.0104928	-1.88077
6588_at	YDL098C	SNU23	-1.26715	5.97345	-4.72187	0.000326582	0.00263952	-0.152559
10208_at	YLR134W	PDC5	1.26688	8.98235	4.26675	0.000780802	0.0053673	-1.03888
5311_at	YFR057W	NA	1.26653	4.13331	5.0195	0.000187098	0.00168587	0.416328
5153_at	YGL136C	MRM2	1.26647	4.92248	3.64786	0.00263244	0.0142576	-2.26363
8995_at	YNL127W	FAR11	1.26629	5.48961	1.72763	0.106019	0.248539	-5.79787
8626_at	YOL071W	EMI5	-1.26605	7.43963	-3.41034	0.00422022	0.0211011	-2.73448
4157_at	YIL060W	NA	-1.26602	8.02075	-3.04148	0.00878972	0.0379695	-3.45917
2646_at	NA	NA	1.26478	4.04722	2.1967	0.0453633	0.134776	-5.03099
3237_f_at	NA	NA	1.26292	6.94155	2.77485	0.0148893	0.0577447	-3.97284
3704_f_at	NA	NA	1.26165	6.07863	2.65055	0.0189972	0.0694087	-4.20786
9157_at	YNL282W	POP3	-1.26156	7.87326	-2.78195	0.0146829	0.0571819	-3.95933
10373_at	YLL057C	JLP1	1.2614	8.89587	4.84607	0.000258502	0.00219209	0.0859861
4226_at	YIL130W	NA	-1.26135	6.38055	-1.52221	0.150199	0.317435	-6.09682
6070_s_at	NA	NA	-1.26123	5.33455	-2.3753	0.0323482	0.10438	-4.71469
9650_at	YML014W	TRM9	-1.26112	7.51304	-3.33276	0.00492484	0.0239445	-2.88778
2947_s_at	NA	NA	1.26042	4.39046	1.36342	0.194256	0.377887	-6.30923
10655_at	YKL084W	HOT13	-1.26038	6.34352	-4.20204	0.000885359	0.00595878	-1.16619
7333_at	YBR020W	GAL1	-1.25839	9.46072	-3.70521	0.0023496	0.0129938	-2.14977
11305_s_at	YAR062W	NA	-1.25806	7.39903	-1.82364	0.0896031	0.221042	-5.6497
4191_at	YIL073C	SPO22	1.25665	5.72723	1.63836	0.123598	0.277286	-5.93095
10352_at	YLL034C	RIX7	-1.25591	5.83847	-3.06816	0.00833622	0.0365003	-3.4072
4453_at	YHR072W	ERG7	1.25486	7.63983	1.38569	0.1875	0.368953	-6.28049
10993_at	YJR016C	ILV3	1.25388	10.8969	3.47764	0.00369141	0.0188508	-2.60125
6697_at	YDL211C	NA	1.25373	7.56473	2.02243	0.0626501	0.170806	-5.32787
9051_at	YNL207W	RIO2	-1.25176	6.6812	-3.0421	0.00877882	0.0379399	-3.45796
3410_f_at	NA	NA	1.2517	3.36358	4.89859	0.000234302	0.00202183	0.186372
6710_at	YDL243C	AAD16orAAD4	1.25147	6.83998	4.46938	0.000528212	0.00391028	-0.642134
5411_at	YFL019C	NA	1.2508	4.30155	3.51004	0.00346106	0.01787	-2.53703
7783_at	YPL015C	HST2	-1.25046	9.99058	-4.95056	0.000212658	0.001864	0.285411
4318_at	YHR205W	SCH9	1.25033	7.22263	1.60933	0.129835	0.287487	-5.97319
8301_at	YOR235W	NA	1.24974	3.55578	2.15483	0.0490569	0.143242	-5.10346
11373_at	YAL036C	RBG1	-1.24838	8.01746	-2.49389	0.0257557	0.0873515	-4.49889
5586_at	YER146W	LSM5	-1.24814	5.2838	-5.92631	3.68195e-05	0.000453756	2.08369
6245_at	YDR234W	LYS4	1.24706	9.20674	1.52525	0.149446	0.316344	-6.09259
8646_at	YOL097C	WRS1	-1.24675	8.63727	-2.54607	0.0232815	0.0812154	-4.40266
7480_at	YBL106C	SRO77	1.24664	6.19062	1.09534	0.291839	0.494252	-6.62584
5089_at	YGL063W	PUS2	1.24638	11.0764	4.60699	0.000406085	0.00313808	-0.374594
10130_at	YLR195C	NMT1	1.24625	9.05699	4.77235	0.000296914	0.00245717	-0.0554169
7638_at	YPR107C	YTH1	1.24553	6.79203	3.72755	0.00224796	0.0125431	-2.10544
7459_s_at	YBL083C	ALG3	1.24478	8.79825	2.54004	0.0235555	0.0818063	-4.41382
2854_s_at	NA	NA	1.2447	2.77607	3.62227	0.0027695	0.0148497	-2.31441
5266_at	YGL247W	BRR6	-1.2442	8.7177	-3.02832	0.00902227	0.0387823	-3.48477
7633_s_at	YPR102C	RPL11AorRPL11B	-1.24399	7.60341	-4.19744	0.000893304	0.00600033	-1.17524
8355_at	YOR198C	BFR1	-1.24372	6.55454	-2.95522	0.010429	0.0434232	-3.62656
8499_at	YOR072W	NA	1.24327	5.90262	4.34617	0.000669572	0.0047532	-0.883006
2882_at	NA	NA	-1.24313	6.63784	-2.82542	0.0134782	0.0535086	-3.87632
5120_at	YGL122C	NAB2	-1.24302	7.87021	-2.79163	0.0144057	0.0564083	-3.94086
3441_f_at	NA	NA	1.2429	5.03214	2.00252	0.0649698	0.175186	-5.36094
10799_at	YKL213C	DOA1	1.24164	7.16904	1.60818	0.130087	0.287832	-5.97485
5053_at	YGL054C	ERV14	-1.24138	5.47301	-3.30101	0.00524615	0.0251659	-2.95042
6473_i_at	YDR012W	NA	-1.24127	8.93074	-4.52168	0.000477855	0.00360612	-0.540244
9454_at	YMR184W	NA	-1.24104	6.28797	-2.96968	0.0101345	0.0425769	-3.59857
9054_g_at	YNL205C	RTT106orSPS18	-1.24001	4.15141	-3.65444	0.00259832	0.0141445	-2.25057
6582_at	YDL104C	QRI7	1.23939	10.6821	6.24665	2.1301e-05	0.000297226	2.64655
3712_s_at	NA	NA	-1.23781	6.74755	-4.21696	0.00086004	0.00583041	-1.13681
3635_f_at	NA	NA	-1.23671	3.29142	-5.11819	0.000155925	0.00145121	0.602788
7801_at	YPL042C	SSN3	-1.23644	9.23339	-3.90501	0.00158352	0.00954304	-1.75333
7450_at	YBL091C	MAP2	-1.23461	10.9921	-4.64489	0.000377851	0.00296906	-0.301192
6080_at	YDR382W	RPP2B	-1.2341	6.69625	-3.3277	0.00497469	0.024124	-2.89777
10159_at	YLR179C	NA	-1.23324	7.64488	-3.8806	0.00166151	0.00987279	-1.80172
7698_at	YPR035W	GLN1	-1.2331	6.05444	-3.33725	0.00488102	0.0237561	-2.87892
3797_f_at	NA	NA	-1.23237	3.34128	-6.98475	6.36909e-06	0.000112605	3.88931
3699_f_at	NA	NA	-1.23231	4.24698	-4.32775	0.000693832	0.00487745	-0.91912
8024_at	YPL271W	ATP15	-1.23205	4.96559	-5.12854	0.000152985	0.00143242	0.622271
5191_f_at	YGL189C	RPS26A	-1.23156	7.62784	-3.01985	0.00917517	0.0392531	-3.50124
6545_at	YDL053C	PBP4	-1.23055	7.85669	-4.65999	0.000367183	0.00290173	-0.272009
7883_at	YPL142C	NA	-1.22963	5.41101	-5.19405	0.00013566	0.00131096	0.745322
7478_s_at	YBL109W	NA	-1.22917	5.99279	-2.82712	0.0134332	0.0533839	-3.87308
9180_at	YNL304W	YPT11	-1.22822	7.80675	-2.11936	0.0524022	0.150238	-5.1643
10186_s_at	YLR156W	NA	1.22744	6.84744	4.57287	0.000433357	0.00332954	-0.440775
11311_at	YAL010C	MDM10	1.22573	5.76964	3.09236	0.007945	0.0351001	-3.35998
11114_at	YJL088W	ARG3	-1.22558	8.72135	-6.40958	1.62134e-05	0.000238725	2.92739
3740_f_at	NA	NA	1.22545	5.82824	1.95586	0.0707195	0.18654	-5.43776
8635_at	YOL062C	APM4	1.22432	8.9741	5.08734	0.000165047	0.00152634	0.544608
4467_at	YHR085W	IPI1	-1.22399	7.82762	-2.84456	0.012979	0.0519997	-3.83968
6657_at	YDL163W	NA	-1.22371	6.06508	-3.3844	0.00444382	0.0220384	-2.78578
11141_at	YJL106W	IME2	1.22347	5.70744	1.96442	0.0696314	0.184584	-5.42375
8496_at	YOR068C	VAM10	-1.22288	7.26495	-3.24769	0.00583349	0.0274612	-3.05544
4251_at	YIL150C	MCM10	1.222	6.40477	1.94256	0.0724422	0.189744	-5.45949
5781_i_at	YEL054C	RPL12AorRPL12B	-1.22173	7.11644	-3.43953	0.00398209	0.0200825	-2.67671
9340_at	YMR290W-A	NA	-1.22079	6.66482	-2.40544	0.0305347	0.0998742	-4.66024
9059_at	YNL200C	NA	-1.22076	5.38553	-3.41657	0.00416824	0.0208747	-2.72215
9860_at	YLR456W	NA	-1.22076	6.39104	-3.97893	0.0013693	0.00851161	-1.60685
6919_at	YCL058C	FYV5	-1.22037	7.94838	-3.60629	0.00285878	0.0152495	-2.34614
7272_at	YBR091C	MRS5	-1.21996	5.30468	-3.3548	0.00471348	0.0230973	-2.84427
3093_f_at	NA	NA	1.21954	3.61744	1.83803	0.0873496	0.216864	-5.62708
4122_at	YIL005W	EPS1	-1.21914	7.25361	-1.51679	0.151552	0.319353	-6.10435
9141_at	YNL298W	CLA4	1.219	5.41891	1.2766	0.222497	0.414986	-6.4178
3580_f_at	NA	NA	1.2182	6.45031	3.38925	0.00440109	0.0218649	-2.77618
4373_at	YHR168W	MTG2	1.21705	10.2259	4.65508	0.000370614	0.00291956	-0.281487
9577_at	YMR044W	IOC4	-1.21245	11.1739	-4.27343	0.00077075	0.00531385	-1.02574
6399_at	YDR075W	PPH3	1.21122	6.8927	2.30889	0.0367103	0.115472	-4.8336
5759_at	YEL031W	SPF1	1.21071	5.80411	1.22766	0.2398	0.435427	-6.47651
5671_s_at	YER056C-A	RPL34BorRPL34A	1.21051	7.22361	2.90113	0.0116071	0.0474191	-3.73098
8203_at	YOR359W	VTS1	-1.21002	8.9813	-1.99004	0.0664643	0.178186	-5.38158
10728_at	YKL145W	RPT1	1.20954	9.89595	4.83892	0.000261992	0.0022153	0.0722931
7319_at	YBR051W	NA	1.20941	9.0849	3.31941	0.00505744	0.0244999	-2.91412
7566_at	YPR168W	NUT2	-1.20916	5.38523	-3.24223	0.00589723	0.0277333	-3.06618
6884_at	YCR006C	NA	-1.20889	5.63235	-4.11067	0.00105793	0.00694013	-1.34637
8832_at	YNR029C	NA	-1.20793	7.82448	-4.84962	0.000256789	0.00218118	0.0927754
6872_at	YCL007C	NA	1.20781	6.92816	2.76857	0.0150743	0.0583654	-3.98479
9513_at	YMR116C	ASC1	1.20683	7.83576	2.87	0.0123436	0.0499686	-3.79087
4223_at	YIL133C	RPL16A	-1.20646	10.4681	-3.18624	0.00659226	0.0302551	-3.1762
9025_at	YNL143C	NA	-1.20644	4.13059	-3.69714	0.00238748	0.0131798	-2.1658
11032_at	YJR010W	MET3	1.20629	9.99205	4.44676	0.000551653	0.00406126	-0.686269
3586_f_at	NA	NA	-1.2052	3.6772	-5.13243	0.000151895	0.00142793	0.629596
6691_at	YDL217C	TIM22	1.20483	5.80807	2.86547	0.0124545	0.0502648	-3.79957
7752_at	YPL001W	HAT1	-1.20437	7.83692	-5.4052	9.24456e-05	0.000952516	1.13837
9074_at	YNL229C	URE2	1.20383	8.64205	5.06121	0.000173202	0.00158269	0.495264
10852_at	YJR150C	DAN1	-1.20379	8.17206	-2.30251	0.0371576	0.116633	-4.84495
3785_f_at	NA	NA	-1.20338	3.92856	-4.51335	0.000485536	0.00366113	-0.556466
6084_at	YDR387C	NA	-1.20313	7.04363	-2.85267	0.012773	0.051417	-3.82413
3864_i_at	NA	NA	-1.2027	5.77223	-2.26383	0.0399808	0.123338	-4.91343
4498_at	NA	NA	-1.20235	3.21915	-1.81862	0.0904017	0.222313	-5.65757
6682_at	YDL182W	LYS20	1.20145	7.67926	1.46252	0.165664	0.339425	-6.17869
11138_at	YJL109C	UTP10	1.20059	6.15193	1.42486	0.176088	0.35469	-6.2291
8634_at	YOL063C	NA	-1.20041	10.3803	-1.85815	0.0842817	0.211725	-5.59524
5192_at	YGL188C	NA	-1.20006	4.10016	-2.8908	0.0118465	0.0481863	-3.75086
11159_s_at	YJL136C	RPS21AorRPS21B	-1.19922	8.1623	-3.65222	0.00260975	0.0141887	-2.25496
8569_at	YOR008C	SLG1	-1.19883	8.62134	-2.53006	0.0240152	0.0829996	-4.43226
6267_at	YDR210W	NA	-1.1981	8.67324	-3.96766	0.00139995	0.00863179	-1.62918
2507_s_at	NA	NA	1.19711	3.61978	1.57598	0.137331	0.298414	-6.02108
11383_at	YAL064C-A	NA	-1.19706	4.45199	-4.60931	0.000404292	0.003132	-0.370088
10708_at	YKL121W	NA	1.196	7.15679	1.24389	0.233948	0.42931	-6.45724
4419_at	YHR125W	NA	1.19566	3.84279	3.73966	0.00219472	0.0123123	-2.0814
5372_at	YFL014W	HSP12	-1.19451	5.93418	-2.39398	0.0312123	0.101765	-4.68097
3715_f_at	NA	NA	-1.19393	3.98042	-3.91165	0.00156296	0.00943741	-1.74017
2327_s_at	NA	NA	-1.19382	5.57409	-3.80826	0.00191636	0.0110291	-1.94523
7338_at	YBR025C	NA	-1.19316	9.53788	-4.928	0.000221786	0.00192952	0.24246
4336_at	YHR176W	FMO1	1.19303	9.96821	4.36004	0.000651881	0.00467381	-0.855829
9508_at	YMR112C	MED11	-1.1929	4.7509	-3.03998	0.0088158	0.0380645	-3.46208
6231_at	YDR266C	NA	-1.1926	9.80491	-3.76606	0.00208304	0.0117921	-2.02899
4393_at	YHR143W-A	RPC10	-1.19204	4.03947	-3.49005	0.00360138	0.0184618	-2.57664
5142_i_at	YGL147C	RPL9BorRPL9A	-1.19199	5.22806	-2.89776	0.0116847	0.0476316	-3.73746
10760_at	YKL206C	NA	-1.19196	7.80397	-4.32845	0.000692898	0.00487745	-0.917754
6315_at	YDR169C	STB3	-1.19109	6.31219	-1.61696	0.12817	0.284669	-5.96214
9106_at	YNL243W	SLA2	-1.19106	7.01493	-1.37497	0.190729	0.373339	-6.29437
8575_at	YOL032W	NA	1.19092	4.9801	3.20615	0.0063362	0.0294124	-3.13711
10332_at	YLL011W	SOF1	1.19083	9.2372	4.83901	0.000261948	0.0022153	0.0724657
10227_at	YLR108C	NA	1.19054	8.90631	3.99557	0.00132529	0.00831983	-1.57391
3711_f_at	NA	NA	-1.18996	3.78368	-4.35165	0.000662527	0.00472114	-0.872271
6528_at	YDL070W	BDF2	-1.18963	7.64001	-1.16695	0.262707	0.461927	-6.54676
5751_at	YEL039C	CYC7	-1.18933	4.63331	-3.90196	0.00159306	0.00958816	-1.75938
11192_at	YJL188C	NA	-1.18898	4.75732	-5.37095	9.83399e-05	0.000995665	1.07499
9672_at	YML036W	NA	1.18806	5.86453	4.53624	0.000464743	0.00353288	-0.511938
5036_at	YGL026C	TRP5	-1.18768	9.88422	-2.6545	0.018851	0.0689824	-4.20044
11030_at	YJR008W	NA	-1.18679	8.41233	-5.18919	0.000136873	0.00131858	0.736212
9160_at	YNL279W	PRM1	1.18594	8.18979	2.3902	0.031439	0.102223	-4.6878
7768_at	YPL030W	NA	1.18561	9.34293	1.36335	0.194275	0.377887	-6.30931
7420_at	YBL032W	HEK2	-1.1855	6.44357	-2.09772	0.0545451	0.15411	-5.20116
9714_at	YML085C	TUB1	-1.18513	5.31161	-1.08041	0.298202	0.500985	-6.64179
6072_at	YDR375C	BCS1	1.18511	8.15232	1.93413	0.0735519	0.191574	-5.47319
8010_i_at	YPL240C	HSC82orHSP82	-1.18451	8.97094	-2.6927	0.0174942	0.065037	-4.12855
10108_at	YLR216C	CPR6	1.18432	10.0748	4.89055	0.000237851	0.00204639	0.171016
10747_at	YKL172W	EBP2	-1.18339	9.55875	-5.92715	3.67665e-05	0.000453756	2.08517
11222_at	YJL204C	RCY1	1.18075	6.78627	1.81978	0.0902176	0.222038	-5.65576
10700_at	YKL128C	PMU1	-1.17868	9.58156	-3.3279	0.00497273	0.024124	-2.89738
3657_f_at	NA	NA	1.17848	7.20205	2.9356	0.0108422	0.0450029	-3.66449
7127_at	YBR217W	ATG12	-1.17841	6.64944	-3.04264	0.00876948	0.0379171	-3.45691
5608_at	YER123W	YCK3	-1.17806	7.80445	-3.9401	0.00147787	0.00901107	-1.68378
6093_at	YDR396W	NA	-1.17768	7.54977	-5.82466	4.39334e-05	0.000524447	1.90213
6164_at	YDR290W	NA	1.17665	5.0157	3.10003	0.0078248	0.0346676	-3.345
9943_at	YLR364W	NA	-1.17609	3.37681	-3.58959	0.00295513	0.0156061	-2.37927
7707_i_at	YPR043W	RPL43A	-1.176	7.74343	-3.36383	0.00462953	0.0227576	-2.82643
4415_at	YHR122W	NA	-1.17596	7.51013	-3.84735	0.00177407	0.0103766	-1.86767
3844_f_at	NA	NA	-1.17569	3.95369	-4.04621	0.00120007	0.00767832	-1.47374
4173_at	YIL093C	RSM25	-1.17456	6.70005	-3.1005	0.00781749	0.0346676	-3.34408
9909_at	YLR418C	CDC73	-1.1741	7.15585	-2.42565	0.0293736	0.096823	-4.62359
7081_at	YBR261C	NA	-1.17155	9.65755	-2.92728	0.0110222	0.0455765	-3.68056
4461_r_at	YHR079C-A	SAE3	-1.17152	4.86867	-2.90791	0.0114526	0.0469314	-3.71791
4530_at	YHR011W	DIA4	1.16941	9.96738	6.46445	1.48019e-05	0.000221791	3.02114
7160_at	YBR205W	KTR3	-1.16893	10.1242	-6.29766	1.95489e-05	0.000276918	2.73487
6027_at	YDR421W	ARO80	1.168	4.77955	3.36623	0.0046074	0.0226769	-2.82168
9312_at	YMR305C	SCW10	-1.1676	6.02564	-1.84073	0.0869314	0.216286	-5.62281
7775_at	YPL023C	MET12	-1.16725	7.90111	-1.7418	0.10344	0.244522	-5.77632
4204_at	YIL107C	PFK26	1.16715	7.2994	1.21548	0.244264	0.440165	-6.49083
11136_at	YJL111W	CCT7	-1.16692	7.57635	-2.23638	0.042105	0.128238	-4.9617
6291_at	YDR189W	SLY1	-1.16522	8.98684	-3.33103	0.00494186	0.0240081	-2.8912
5070_at	YGL081W	NA	1.16513	9.98068	3.92665	0.00151749	0.00921051	-1.71043
11036_at	YJL031C	BET4	1.16386	5.89444	3.75436	0.00213179	0.0120243	-2.0522
9906_at	YLR415C	NA	1.16338	11.0828	3.99252	0.00133326	0.00835864	-1.57996
8538_at	YOR020C	HSP10	-1.16246	7.64324	-3.73765	0.00220347	0.012354	-2.08539
5791_at	YEL044W	IES6	-1.16157	4.06415	-2.67899	0.0179699	0.0664018	-4.15439
4364_at	YHR159W	NA	1.16154	7.0102	2.78393	0.0146257	0.0570782	-3.95555
9546_at	YMR104C	YPK2	-1.16138	8.27182	-2.41529	0.0299634	0.0984196	-4.6424
9853_at	YLR449W	FPR4	-1.1584	8.67068	-4.28028	0.000760595	0.00525937	-1.0123
5323_at	YFR026C	NA	-1.15789	4.0722	-2.40106	0.0307918	0.10061	-4.66817
5464_i_at	NA	NA	-1.15786	3.81253	-2.36479	0.0330041	0.106276	-4.7336
7432_at	YBL064C	PRX1	-1.15649	6.45276	-3.82175	0.00186598	0.0108058	-1.91845
5118_at	YGL124C	MON1	1.15639	9.87438	2.28565	0.0383642	0.119696	-4.87486
8557_at	YOL005C	RPB11	-1.15563	3.98337	-2.76338	0.0152288	0.058817	-3.99466
8498_at	YOR071C	NA	1.15498	6.97185	1.62328	0.126804	0.28278	-5.95295
7280_at	YBR099C	NA	-1.15438	6.56043	-3.48635	0.00362799	0.0185676	-2.58398
3771_f_at	NA	NA	-1.15436	4.20162	-3.31174	0.00513525	0.0247829	-2.92925
10955_at	YJR071W	NA	-1.15425	8.07513	-4.63905	0.000382068	0.00299967	-0.312499
7746_at	YPL007C	TFC8	-1.15402	8.25556	-2.38242	0.0319108	0.103338	-4.70186
7389_at	YBL018C	POP8	-1.15343	7.17392	-3.50617	0.00348782	0.0179883	-2.54471
4957_at	YGR030C	POP6	-1.15311	4.94149	-5.76944	4.83871e-05	0.000567455	1.80292
8520_at	YOR047C	STD1	1.15303	10.3198	3.44755	0.00391909	0.0198398	-2.66084
8717_at	YOL164W	NA	1.15282	8.74833	2.73291	0.016168	0.0613531	-4.0525
10140_r_at	YLR202C	NA	-1.15248	3.60963	-5.88166	3.97833e-05	0.000482308	2.00411
10731_at	YKL142W	MRP8	-1.15161	6.29088	-4.01433	0.00127742	0.00807909	-1.53679
9374_at	YMR235C	RNA1	-1.1513	7.5365	-5.31949	0.000107942	0.00107654	0.979489
10750_at	YKL169C	NA	-1.14982	7.96197	-4.80058	0.00028155	0.00234667	-0.00120027
11084_at	YJL073W	JEM1	-1.14946	3.64803	-2.7167	0.0166906	0.06292	-4.08321
10093_at	YLR245C	CDD1	-1.1474	5.96568	-3.24334	0.00588421	0.027686	-3.064
4884_i_at	YGR138C	NA	-1.14644	8.06846	-2.5179	0.0245873	0.0844454	-4.4547
8863_at	YNR015W	SMM1	-1.14628	6.12955	-3.6649	0.002545	0.01394	-2.22981
3619_f_at	NA	NA	1.14601	4.40852	4.87083	0.000246785	0.00210965	0.133353
10285_at	YLR033W	RSC58	1.14325	8.72964	3.56291	0.00311589	0.0163409	-2.43219
6860_at	YCR026C	NA	1.143	6.82572	1.46286	0.165573	0.339402	-6.17823
8861_at	YNR013C	PHO91	-1.14277	7.01228	-1.70611	0.110042	0.255216	-5.83037
8993_at	YNL129W	NRK1	-1.14248	4.64806	-2.91183	0.0113642	0.0466844	-3.71036
4519_at	YHR002W	LEU5	-1.14148	7.96244	-2.83254	0.0132904	0.0530196	-3.8627
7241_at	YBR105C	VID24	-1.14104	8.25906	-4.94255	0.000215854	0.00188493	0.270166
4335_at	YHR175W	CTR2	-1.1407	8.963	-2.92267	0.0111231	0.0459077	-3.68945
10532_at	YKR061W	KTR2	1.14041	7.27918	2.78585	0.0145706	0.0569106	-3.95189
6538_at	YDL060W	TSR1	-1.13967	11.5897	-2.52404	0.0242969	0.0838801	-4.44338
9489_at	YMR135W-A	NA	1.13955	5.77451	3.4753	0.00370858	0.0188972	-2.60587
10698_at	YKL130C	SHE2	-1.13948	6.83854	-3.8045	0.00193064	0.0110976	-1.95269
10129_at	YLR194C	NA	-1.13912	8.49478	-2.98169	0.00989623	0.0417448	-3.5753
6842_at	YCR054C	CTR86	-1.13912	8.86818	-2.92718	0.0110243	0.0455765	-3.68075
9868_at	YLL018C-A	COX19	-1.13852	4.21902	-2.70435	0.0170993	0.0640024	-4.10654
6595_at	YDL133W	NA	-1.13802	9.79631	-6.2775	2.02225e-05	0.000284731	2.70001
7952_at	YPL206C	NA	-1.13784	8.74581	-2.38697	0.0316343	0.102715	-4.69365
9761_at	YML124C	TUB3	1.13773	11.7275	3.71334	0.00231207	0.0128105	-2.13363
6258_at	YDR201W	SPC19	-1.13766	9.95198	-3.54391	0.0032358	0.0168467	-2.46989
3284_f_at	NA	NA	1.13671	6.84278	3.36335	0.00463392	0.0227672	-2.82737
11034_at	YJL033W	HCA4	-1.13577	6.92423	-2.52108	0.0244365	0.0842062	-4.44884
10602_at	YKL050C	NA	1.13571	6.71751	1.29022	0.217858	0.409517	-6.40113
10511_at	YKR039W	GAP1	1.13556	7.8117	1.66226	0.118658	0.26976	-5.89577
9403_at	YMR221C	NA	1.13552	6.59787	2.09876	0.0544409	0.153955	-5.1994
9143_at	YNL296W	NA	-1.13462	6.65624	-3.72372	0.00226506	0.012616	-2.11304
6667_at	YDL196W	NA	-1.13345	6.37776	-4.48457	0.000513043	0.00381951	-0.61251
[truncated: 7,336 more rows]
