# Supplementary material for: Covert Genetic Selections to Optimize Phenotypes
Source: PLoS One. 2007 Nov 21;2(11):e1200. doi: 10.1371/journal.pone.0001200 (PMC2075469; doi:10.1371/journal.pone.0001200)
Supplement: Table S7 — Inhibitory cDNAs, Comparison to Previous Studies. The citations of earlier investigations which have identified yeast cDNAs and gene fragments which inhibit growth are included in the text. In the study of Sopko et al. the magnitude of growth inhibition is designated 1–4, with 1 being the strongest inhibition. (0.28 MB XLS) [file pone.0001200.s012.xls]

## Sheet: ST4
Table S2 - Inhibitory Genes
Systematic Name	Standard Name	Sopko Inhibition (severity 1-4)	SPI 30oC data (FC)	Other Reports of Inhibition
YOR299W	BUD7		YOR188W	---
YML051W	GAL80	2	20.9909	---
YGR079W	YGR079W	2.5	20.4046	---
YLL065W	YLL065W	2.5	18.8425	---
YOR170W	YOR170W	3.5	11.0721	---
YGL147C	RPL9A	4	10.9682	---
YEL045C	YEL045C	3.5	10.0028	---
YHL002W	HSE1	3	8.31472	---
YBR047W	FMP23	3.5	6.78445	---
YOR331C	YOR331C	2	6.62079	---
YAL029C	MYO4	2.5	6.51646	Boyer, YPD
YLR418C	CDC73	2.5	6.38069	---
YJR155W	AAD10	3.5	5.80932	---
YOR377W	ATF1	4	5.66817	---
YNL203C	YNL203C	3.5	5.57968	---
YGR191W	HIP1	4	5.49425	Boyer
YML042W	CAT2	4	5.30066	---
YBL028C	YBL028C	2	4.85986	---
YNL140C	YNL140C	4	4.61784	---
YER048W-A	YER048W-A	2	4.26626	---
YML016C	PPZ1	3	4.15355	---
YAL033W	POP5	2.5	4.08065	---
YPL245W	YPL245W	2.5	4.0183	---
YPR066W	UBA3	3	4.00394	---
YGR294W	YGR294W	1	3.89502	---
YGR273C	YGR273C	3	3.87159	---
YFL049W	YFL049W	3	3.34767	---
YMR072W	ABF2	1.5	3.27115	---
YPL012W	RRP12	4	3.23771	---
YFL011W	HXT10	3	3.18528	---
YLR202C	YLR202C	3	3.09639	---
YNL108C	YNL108C	2.5	2.94522	---
YGR248W	SOL4	1.5	2.50645	---
YGR148C	RPL24B	2.5	2.39758	---
YPR128C	ANT1	2	2.22407	---
YDR189W	SLY1	2.5	2.2006	---
YJL172W	CPS1	2.5	2.16979	---
YOL080C	REX4	4	2.04455	---
YAL030W	SNC1	2	1	---
YAR002W	NUP60	2	1	Boyer
YAR018C	KIN3	2	1	---
YBL014C	RRN6	2.5	1	---
YBL022C	PIM1	1.5	1	---
YBL031W	SHE1	1.5	1	---
YBL070C	YBL070C	4	1	---
YBL097W	BRN1	1.5	1	Boyer, YPD
YBR009C	HHF1	1	1	---
YBR029C	CDS1	4	1	---
YBR059C	AKL1	3	1	---
YBR089C-A	NHP6B	3	1	---
YBR097W	VPS15	4	1	---
YBR136W	MEC1	2	1	---
YBR203W	COS111	1.5	1	---
YBR250W	YBR250W	2	1	---
YBR260C	RGD1	2.5	1	---
YCL014W	BUD3	3.5	1	---
YCL069W	VBA3	4	1	---
YCR027C	RHB1	1.5	1	---
YCR034W	FEN1	2.5	1	---
YCR039C	MATALPHA2	1	1	---
YDL003W	MCD1	1	1	Boyer, YPD
YDL028C	MPS1	2.5	1	Boyer, YPD
YDL034W	YDL034W	3	1	---
YDL041W	YDL041W	4	1	---
YDL051W	LHP1	3	1	---
YDL067C	COX9	1	1	---
YDL103C	QRI1	1	1	---
YDL107W	MSS2	2.5	1	---
YDL126C	CDC48	1.5	1	---
YDL141W	BPL1	1	1	---
YDL186W	YDL186W	1.5	1	---
YDL220C	CDC13	1.5	1	---
YDL239C	ADY3	2	1	---
YDR011W	SNQ2	3	1	Boyer
YDR026C	YDR026C	1.5	1	---
YDR028C	REG1	2.5	1	Boyer
YDR040C	E---1	3	1	---
YDR096W	GIS1	1.5	1	Boyer
YDR111C	ALT2	4	1	---
YDR151C	CTH1	1	1	Boyer, Thompson
YDR156W	RPA14	2.5	1	---
YDR194C	MSS116	2.5	1	---
YDR225W	HTA1	2	1	---
YDR231C	COX20	1	1	---
YDR238C	SEC26	1.5	1	---
YDR293C	SSD1	3.5	1	---
YDR303C	RSC3	2	1	---
YDR385W	EFT2	2.5	1	---
YDR443C	SSN2	3	1	---
YDR470C	UGO1	1	1	Boyer, Stevenson
YDR505C	PSP1	1	1	---
YDR510W	SMT3	1.5	1	---
YEL022W	GEA2	1.5	1	---
YEL055C	POL5	2	1	---
YER016W	BIM1	1	1	---
YER037W	PHM8	3	1	---
YER049W	YER049W	3	1	---
YER056C-A	RPL34A	3	1	---
YER105C	NUP157	2.5	1	---
YER111C	SWI4	2	1	Boyer, YPD
YER131W	RPS26B	1.5	1	---
YER132C	PMD1	3.5	1	---
YER144C	UBP5	3	1	---
YER151C	UBP3	2.5	1	---
YFL034W	YFL034W	3	1	---
YFL038C	YPT1	2	1	---
YGL009C	LEU1	4	1	---
YGL014W	PUF4	1	1	---
YGL016W	KAP122	1.5	1	---
YGL036W	YGL036W	1.5	1	---
YGL075C	MPS2	1	1	---
YGL094C	PAN2	3.5	1	---
YGL162W	SUT1	1.5	1	---
YGL166W	CUP2	1	1	---
YGL180W	ATG1	1	1	---
YGL186C	TPN1	1.5	1	---
YGL233W	SEC15	2	1	---
YGR014W	MSB2	1.5	1	---
YGR032W	GSC2	2	1	---
YGR083C	GCD2	2	1	---
YGR094W	VAS1	2.5	1	---
YGR109W-A	YGR109W-A	4	1	---
YGR116W	SPT6	3	1	Boyer
YGR166W	KRE11	1.5	1	---
YGR233C	PHO81	2.5	1	---
YGR244C	LSC2	1	1	---
YGR282C	BGL2	4	1	---
YHL023C	RMD11	4	1	---
YHR014W	SPO13	1	1	---
YHR056C	RSC30	3.5	1	Boyer
YHR061C	GIC1	3	1	---
YHR082C	KSP1	1	1	Boyer, Stevenson
YHR084W	STE12	1	1	---
YHR086W	---M8	1	1	---
YHR089C	GAR1	3	1	---
YHR098C	SFB3	1	1	Boyer, YPD
YHR156C	LIN1	1.5	1	---
YHR158C	KEL1	3	1	---
YHR162W	YHR162W	2.5	1	Boyer, Stevenson
YHR185C	PFS1	2	1	---
YIL087C	YIL087C	2.5	1	---
YIL089W	YIL089W	3.5	1	---
YIL109C	SEC24	3	1	---
YIL144W	TID3	1.5	1	---
YJL056C	ZAP1	2	1	---
YJL089W	SIP4	2	1	---
YJL105W	SET4	1.5	1	---
YJR003C	YJR003C	1	1	---
YJR091C	JSN1	3.5	1	---
YJR117W	STE24	3	1	---
YJR159W	SOR1	2.5	1	Boyer
YKL004W	AUR1	2.5	1	---
YKL015W	PUT3	1.5	1	---
YKL020C	SPT23	3	1	---
YKL042W	SPC42	1	1	---
YKL049C	CSE4	3.5	1	---
YKL101W	HSL1	1	1	---
YKL146W	AVT3	2.5	1	---
YKL183W	LOT5	3.5	1	---
YKL203C	TOR2	2	1	Boyer, Alarcon
YKL205W	LOS1	1	1	---
YKR081C	RPF2	2	1	---
YKR089C	STC1	2	1	---
YKR093W	PTR2	2	1	---
YLL027W	ISA1	2.5	1	---
YLR053C	YLR053C	3.5	1	---
YLR054C	OSW2	3	1	---
YLR054C	YLR054C	3	1	---
YLR071C	RGR1	3.5	1	---
YLR114C	YLR114C	1.5	1	Boyer
YLR132C	YLR132C	1	1	---
YLR241W	YLR241W	2	1	---
YLR263W	RED1	2	1	---
YLR305C	STT4	3	1	---
YLR311C	YLR311C	1	1	---
YLR389C	STE23	4	1	Boyer
YLR435W	TSR2	3	1	---
YLR436C	ECM30	3.5	1	Boyer
YML010W	SPT5	3	1	---
YML032C	RAD52	3	1	---
YML052W	SUR7	3.5	1	---
YML117W	---B6	3	1	Boyer
YML130C	ERO1	3	1	---
YMR016C	SOK2	1.5	1	---
YMR037C	MSN2	2	1	---
YMR052C-A	YMR052C-A	2	1	---
YMR070W	MOT3	1	1	---
YMR073C	YMR073C	2.5	1	---
YMR074C	YMR074C	2	1	---
YMR080C	---M7	3.5	1	---
YMR164C	MSS11	1	1	---
YMR179W	SPT21	1	1	---
YMR190C	SGS1	4	1	Boyer
YMR195W	ICY1	2.5	1	---
YMR229C	RRP5	2	1	Boyer
YMR259C	YMR259C	4	1	---
YMR280C	CAT8	3	1	---
YMR295C	YMR295C	3	1	---
YMR306W	FKS3	4	1	---
YMR316C-B	YMR316C-B	2	1	---
YNL028W	YNL028W	1	1	---
YNL070W	TOM7	3.5	1	---
YNL074C	MLF3	3	1	---
YNL076W	MKS1	1.5	1	Boyer, Stevenson
YNL091W	NST1	2.5	1	---
YNL101W	AVT4	2	1	---
YNL126W	SPC98	1.5	1	---
YNL131W	TOM22	2	1	---
YNL188W	KAR1	1.5	1	Boyer, Liu
YNL255C	GIS2	3	1	---
YNL270C	ALP1	2.5	1	---
YNR031C	SSK2	2	1	---
YNR072W	HXT17	3	1	---
YOL012C	HTZ1	2.5	1	---
YOL051W	GAL11	2	1	---
YOL054W	PSH1	2.5	1	---
YOL075C	YOL075C	2.5	1	---
YOL084W	PHM7	2	1	---
YOL130W	ALR1	2.5	1	---
YOL138C	YOL138C	2.5	1	---
YOR008C	SLG1	3	1	---
YOR029W	YOR029W	2	1	---
YOR030W	DFG16	3.5	1	Boyer
YOR032C	HMS1	1.5	1	---
YOR048C	RAT1	4	1	---
YOR090C	PTC5	2.5	1	---
YOR096W	RPS7A	3.5	1	---
YOR151C	RPB2	2.5	1	---
YOR168W	GLN4	1	1	---
YOR188W	MSB1	2	1	Boyer
YOR211C	MGM1	2.5	1	Boyer
YOR212W	STE4	2	1	---
YOR257W	CDC31	2	1	---
YOR306C	MCH5	3.5	1	---
YOR313C	SPS4	3	1	---
YOR360C	PDE2	2.5	1	---
YPL008W	CHL1	3	1	---
YPL058C	PDR12	2	1	Boyer
YPL124W	SPC29	1.5	1	Boyer
YPL203W	TPK2	1	1	---
YPL207W	YPL207W	1	1	---
YPL242C	IQG1	1.5	1	Boyer, YPD
YPL250C	ICY2	2	1	---
YPL255W	BBP1	1	1	Boyer, YPD
YPL279C	YPL279C	1.5	1	---
YPR020W	ATP20	2.5	1	Boyer
YPR021C	AGC1	4	1	Boyer
YPR024W	YME1	2	1	Boyer
YPR041W	TIF5	3	1	---
YPR059C	YPR059C	3	1	---
YPR107C	YTH1	3.5	1	---
YPR129W	SCD6	2	1	---
YPR133W-A	TOM5	2.5	1	---
YPR157W	YPR157W	3	1	Boyer
YDR292C	SRP101		-2.0029	---
YDL026W	---		-2.01099	---
YFL025C	BST1		-2.01169	---
YLR457C	NBP1		-2.01698	---
YER174C	GRX4	3	-2.01749	---
YKL035W	UGP1		-2.01814	---
YPL062W	---		-2.01982	---
YLL014W	---		-2.02004	---
YDR224C	HTB1	1	-2.02809	---
YER112W	LSM4		-2.02885	---
YPR166C	MRP2		-2.0326	---
YLL033W	---		-2.03993	---
YJR161C	COS5		-2.04158	---
YNL269W	BSC4		-2.04565	---
YGR036C	CAX4		-2.04846	---
YLR156W	---		-2.05873	---
YDR530C	APA2		-2.06062	---
YJR058C	APS2		-2.0639	---
YGR017W	---		-2.07065	---
YOL111C	---		-2.07311	---
YGL187C	COX4		-2.07657	---
YBR010W	HHT1		-2.07733	---
YJR161C	COS5		-2.07863	---
YPL002C	SNF8		-2.09227	---
YHR039C	MSC7	2	-2.09592	---
YGR111W	YGR111W	1.5	-2.10851	---
YJL152W	---		-2.11401	---
YBR013C	---		-2.11656	---
YDL248W	COS7		-2.12019	---
YDL142C	CRD1		-2.13477	Boyer
YGL061C	DUO1		-2.13491	---
YDR154C	---		-2.14281	---
YGL001C	ERG26		-2.14375	---
YKR100C	SKG1		-2.14867	---
YNL055C	POR1		-2.1503	---
YLR417W	VPS36	3.5	-2.15191	---
YGL153W	PEX14		-2.15228	---
YOL052C	SPE2	3.5	-2.15522	---
YJL161W	FMP33		-2.16105	---
YDL109C	---		-2.16946	Boyer
YLR204W	QRI5		-2.17011	---
YJR103W	URA8		-2.17712	---
YNL053W	MSG5		-2.17739	---
YPR015C	YPR015C	1.5	-2.18002	---
YHL037C	---		-2.18128	---
YOR264W	DSE3		-2.18292	---
YLR366W	YLR366W	1.5	-2.19139	---
YOR023C	AHC1		-2.19192	---
YCL034W	LSB5		-2.19745	---
YPR069C	SPE3		-2.20314	---
YAL043C-A	---		-2.20322	---
YHR051W	COX6		-2.20331	---
YGL096W	TOS8	2.5	-2.20831	---
YGL105W	ARC1		-2.2088	---
YML030W	YML030W	3	-2.21093	---
YCR035C	RRP43		-2.21582	---
YAR028W	---		-2.21762	---
YOR240W	---		-2.21828	---
YLR046C	YLR046C	4	-2.22135	---
YLR051C	---		-2.22869	---
YMR116C	ASC1		-2.23229	---
YFL045C	SEC53		-2.24217	---
YCR005C	CIT2		-2.24453	---
YER009W	NTF2	2	-2.25878	---
YFL062W	COS4		-2.25881	---
YGR064W	YGR064W	3	-2.26613	---
YOR319W	HSH49		-2.27197	---
YER063W	THO1	2.5	-2.27642	---
YLR104W	---		-2.28801	---
YDL182W	LYS20		-2.28914	---
YHR123W	EPT1		-2.28941	---
YOL099C	---		-2.29564	---
YLL038C	ENT4		-2.3113	---
YDR038C	E---5	1.5	-2.31162	---
YGR054W	---		-2.32013	---
YGR126W	---		-2.32122	---
YBR230C	---		-2.32195	---
YMR126C	DLT1		-2.32249	---
YDR129C	SAC6		-2.33473	---
YKR097W	PCK1		-2.33612	---
YMR017W	SPO20		-2.33698	---
YCR011C	ADP1	4	-2.36018	Boyer
YIL058W	---		-2.3679	---
YPR182W	SMX3		-2.37766	---
YGL209W	MIG2		-2.39396	---
YPR119W	CLB2	2	-2.39958	---
YEL046C	GLY1		-2.41909	---
YDL197C	ASF2		-2.4215	---
YOR119C	RIO1		-2.42374	---
YJR070C	LIA1		-2.43229	---
YMR293C	---		-2.43431	---
YGL080W	FMP37	2.5	-2.43512	---
YIL167W	SDL1		-2.43702	---
YHR026W	PPA1		-2.43919	---
YML026C	RPS18B		-2.44953	---
YPL191C	---		-2.45067	---
YHR120W	MSH1		-2.45243	---
YLR251W	SYM1		-2.45658	---
YCR059C	YIH1		-2.45693	---
YPL042C	SSN3		-2.46692	---
YOR344C	TYE7		-2.47135	Boyer
YNR017W	MAS6	1	-2.47289	---
YBR262C	FMP51		-2.47363	---
YPR028W	YOP1		-2.47387	---
YER133W	GLC7		-2.47904	---
YKL119C	VPH2		-2.48052	---
YFR045W	---		-2.48815	---
YOL032W	---		-2.49027	---
YOR277C	---		-2.49056	---
YKL118W	YKL118W	2	-2.49362	---
YJL151C	S---3		-2.49658	---
YBR113W	---		-2.49886	---
YBR008C	FLR1		-2.50727	---
YBR034C	HMT1		-2.51035	---
YNL223W	ATG4		-2.51308	---
YGR022C	---		-2.51586	---
YLR029C	RPL15A		-2.51589	Boyer
YDR413C	---		-2.52259	---
YKR045C	---		-2.52287	---
YJR150C	DAN1		-2.52413	---
YJL070C	YJL070C	3.5	-2.53583	---
YML053C	---		-2.53778	---
YPR077C	---		-2.53875	---
YMR252C	---		-2.54018	---
YJR118C	ILM1		-2.54743	---
YGR163W	GTR2	3.5	-2.54942	---
YDL090C	RAM1	1.5	-2.55699	---
YER033C	ZRG8		-2.56043	---
YOR055W	---		-2.56326	---
YGR107W	---		-2.56825	---
YDL130W	RPP1B		-2.57269	---
YPL061W	ALD6		-2.57423	---
YEL017C-A	PMP2		-2.57653	---
YNL046W	YNL046W	3.5	-2.57821	---
YER182W	FMP10		-2.5819	---
YLR413W	---		-2.58191	Boyer
YPR046W	MCM16		-2.58976	---
YGL123W	RPS2		-2.58993	---
YPR032W	SRO7	2.5	-2.59063	---
YPR180W	AOS1		-2.59332	---
YBR126C	TPS1		-2.59988	---
YML068W	ITT1	1	-2.60135	---
YHR105W	YPT35		-2.60198	---
YER044C	ERG28		-2.60638	---
YMR266W	RSN1	3	-2.60797	---
YER184C	---		-2.61608	---
YOR364W	---		-2.62131	---
YOL046C	---		-2.62175	---
YKR070W	---		-2.62288	---
YOR098C	NUP1	1.5	-2.62332	---
YOR106W	VAM3	1	-2.62616	---
YMR039C	SUB1		-2.62853	---
YFR041C	ERJ5		-2.62876	---
YDR100W	TVP15		-2.63193	---
YPL183C	---		-2.63223	---
YIL070C	MAM33		-2.63855	---
YPR154W	PIN3		-2.63898	---
YOR107W	RGS2		-2.6457	---
YER002W	NOP16		-2.64845	---
YGL068W	MNP1	3	-2.65311	---
YDR113C	PDS1	1	-2.65781	---
YDR361C	BCP1		-2.65918	---
YGL058W	RAD6		-2.66183	---
YNL233W	BNI4		-2.67575	---
YNL100W	YNL100W	1.5	-2.67721	---
YMR304W	UBP15		-2.67941	---
YGR153W	---		-2.68296	---
YML058C-A	---		-2.68621	---
YKL013C	ARC19		-2.69439	---
YNL286W	CUS2		-2.69802	---
YGL210W	YPT32		-2.70241	---
YHL043W	ECM34		-2.70863	---
YDR421W	ARO80		-2.70899	---
YOL061W	PRS5		-2.71058	---
YOR073W	SGO1		-2.71149	---
YBR078W	ECM33		-2.71389	---
YLR133W	CKI1		-2.71856	---
YOR064C	YNG1		-2.71894	---
YNR058W	BIO3		-2.72319	---
YLR013W	GAT3	1	-2.72478	Boyer
YGR286C	BIO2		-2.72682	---
YBR129C	OPY1		-2.73867	---
YEL026W	SNU13		-2.74876	---
YIR020C	---		-2.7493	---
YLR439W	MRPL4		-2.74987	---
YPL046C	ELC1		-2.75073	---
YMR148W	---		-2.75272	---
YKL056C	RBF18		-2.7558	---
YPR017C	DSS4		-2.75741	---
YDL027C	---		-2.75908	---
YMR172W	HOT1		-2.76222	---
YNL137C	---M9		-2.76645	Boyer
YBR178W	---		-2.77049	---
YLR176C	RFX1	3	-2.77939	Boyer, Stevenson
YDR038C	E---5	1.5	-2.7819	---
YIL065C	FIS1	3	-2.79114	---
YGL101W	---		-2.79703	---
YIL072W	HOP1		-2.79994	---
YOR309C	YOR309C	2.5	-2.80599	---
YDL092W	SRP14		-2.80691	---
YPR103W	PRE2	4	-2.80869	---
YIL054W	---		-2.80991	---
YMR108W	ILV2		-2.81519	---
YIR043C	---		-2.81721	---
YDL198C	GGC1	1.5	-2.81797	---
YPR038W	---		-2.82401	---
YDR412W	---		-2.82426	---
YOR039W	CKB2		-2.82832	---
YJR035W	RAD26	2.5	-2.82851	---
YDR039C	E---2	1.5	-2.83082	---
YLR283W	---		-2.84066	---
YLR187W	SKG3		-2.84319	---
YIL010W	DOT5		-2.84519	---
YLL007C	---		-2.85463	---
YMR181C	---		-2.85569	Boyer
YOR383C	FIT3		-2.85778	---
YGR056W	RSC1	2.5	-2.8584	Boyer
YKR072C	SIS2		-2.86066	---
YNR069C	BSC5		-2.86517	---
YOR214C	---		-2.87427	---
YDL130W	RPP1B		-2.88363	---
YLR323C	CWC24		-2.90265	---
YLR317W	---		-2.91402	---
YOL104C	NDJ1	2	-2.91503	---
YNL167C	SKO1		-2.91647	---
YCR046C	IMG1		-2.92007	---
YIL140W	AXL2		-2.92058	---
YBR116C	---		-2.92245	---
YNL327W	EGT2		-2.92282	---
YNL321W	---		-2.92655	---
YPR086W	SUA7		-2.93452	Boyer
YLR255C	---		-2.94071	---
YIL124W	AYR1		-2.94913	---
YMR114C	---		-2.95782	---
YJL018W	---		-2.97454	---
YMR071C	TVP18	1	-2.98045	---
YJL145W	SFH5	2.5	-2.98836	---
YIR013C	GAT4	1.5	-2.98935	---
YBR269C	FMP21		-2.99305	---
YIR043C	---		-3.00533	---
YPL109C	YPL109C	2.5	-3.00838	---
YLR357W	RSC2		-3.01115	---
YPL217C	BMS1		-3.01475	---
YDL189W	RBS1	3	-3.02007	---
YOR089C	VPS21		-3.02327	---
YML107C	---		-3.03223	---
YIL016W	SNL1		-3.0425	---
YIL004C	BET1	2.5	-3.04415	---
YDL217C	TIM22		-3.05192	---
YML084W	YML084W	2.5	-3.05486	---
YOL050C	---		-3.05929	---
YGL079W	---		-3.06062	---
YJL119C	---		-3.06113	---
YOL144W	NOP8		-3.06521	---
YBR291C	CTP1		-3.07373	---
YPR002W	PDH1		-3.0756	---
YFL046W	FMP32		-3.08206	---
YBR109C	CMD1		-3.0824	---
YJL038C	---		-3.08267	---
YDL132W	CDC53	3	-3.0868	---
YDR448W	ADA2		-3.09762	---
YJL149W	---		-3.10082	---
YIL147C	SLN1	3	-3.10277	Boyer
YBL061C	SKT5		-3.11616	---
YLR001C	---		-3.11822	---
YLL039C	UBI4		-3.1205	---
YGR046W	YGR046W	3.5	-3.12673	Boyer
YIL171W	---		-3.13616	---
YAR033W	MST28		-3.14257	---
YBL046W	---		-3.14892	---
YLL044W	YLL044W	1.5	-3.16033	---
YBR098W	MMS4		-3.1629	---
YMR245W	---		-3.16341	---
YBR121C	GRS1		-3.168	---
YEL041W	---		-3.16928	---
YDR494W	RSM28		-3.17028	---
YBR105C	VID24		-3.17128	---
YGR143W	SKN1		-3.17196	---
YDR504C	SPG3		-3.17243	---
YDR005C	MAF1		-3.17846	---
YPL162C	---		-3.17887	---
YNR066C	---		-3.18019	---
YNL136W	EAF7		-3.18871	Boyer
YOR201C	MRM1		-3.19091	---
YJL178C	ATG27		-3.19435	---
YFR002W	NIC96	2.5	-3.1947	---
YDL093W	PMT5		-3.19807	---
YAR019C	CDC15		-3.19919	---
YGR102C	---		-3.21985	---
YFR013W	IOC3	2	-3.22128	---
YHR102W	KIC1		-3.22562	---
YKL143W	LTV1		-3.22571	---
YGL242C	---		-3.22666	---
YDR121W	DPB4		-3.23197	---
YGR158C	MTR3		-3.23304	---
YPR153W	---		-3.23887	---
YML057W	CMP2		-3.24555	---
YHR153C	SPO16		-3.25107	---
YLR415C	---		-3.25383	---
YER036C	ARB1		-3.2628	---
YEL012W	UBC8		-3.27876	---
YGR231C	PHB2		-3.28265	---
YNL204C	SPS18	1.5	-3.29133	---
YBR122C	MRPL36		-3.29494	---
YMR204C	INP1		-3.29873	---
YDL224C	WHI4	2.5	-3.29904	Boyer
YGL218W	---		-3.30903	---
YDR259C	YAP6		-3.31578	---
YNL173C	MDG1		-3.32433	---
YOR276W	CAF20		-3.325	---
YCR051W	---		-3.32641	---
YEL053C	MAK10		-3.32824	---
YGL002W	ERP6		-3.33246	---
YLR138W	NHA1		-3.33321	Boyer
YDR374C	YDR374C	4	-3.33909	---
YML001W	YPT7		-3.3431	---
YGR058W	---		-3.3445	---
YOR307C	SLY41	1.5	-3.35207	---
YBR079C	RPG1	2	-3.361	---
YHR160C	PEX18		-3.36475	---
YGR165W	MRPS35		-3.36701	---
YJR010W	MET3		-3.37079	---
YOR358W	HAP5		-3.3723	---
YKR040C	---		-3.37237	---
YOR215C	---		-3.37612	---
YMR284W	YKU70		-3.38235	---
YDL011C	---		-3.3837	---
YOR022C	---		-3.38386	---
YBR040W	FIG1		-3.39076	Boyer
YPL071C	---		-3.39255	---
YER154W	OXA1	3	-3.40219	---
YDL135C	RDI1		-3.40729	---
YKL184W	SPE1		-3.4077	---
YPL043W	NOP4		-3.41612	Boyer
YOR289W	---		-3.41893	---
YDR509W	---		-3.42349	---
YPL199C	---		-3.42599	---
YJR123W	RPS5		-3.43291	Boyer
YDR092W	UBC13		-3.44509	---
YLL011W	SOF1		-3.44697	Boyer
YOR078W	BUD21		-3.45644	---
YOR287C	---		-3.45706	---
YGR026W	---		-3.46081	---
YJR054W	YJR054W	2.5	-3.46128	---
YER124C	DSE1		-3.46268	---
YLL053C	---		-3.4647	---
YJL195C	---		-3.46549	---
YBR242W	---		-3.47447	---
YDR346C	SVF1		-3.4753	---
YIR022W	SEC11		-3.47821	---
YJL074C	SMC3		-3.48664	---
YKL208W	CBT1		-3.48839	---
YDR351W	SBE2	4	-3.50063	---
YLR098C	CHA4		-3.51041	Boyer
YHR189W	PTH1		-3.52059	---
YMR244W	---		-3.53858	---
YDR059C	UBC5		-3.53945	---
YGR253C	PUP2		-3.54525	---
YFR039C	YFR039C	2.5	-3.55096	---
YBR152W	SPP381		-3.59478	---
YJR018W	---		-3.59848	---
YBR171W	SEC66		-3.60514	---
YIR023W	DAL81		-3.60879	---
YNL125C	ESBP6		-3.60955	---
YJL210W	PEX2	2.5	-3.62823	---
YIR027C	DAL1		-3.62989	---
YLR057W	YLR057W	2.5	-3.63716	Boyer, Stevenson
YNR018W	---		-3.63887	---
YJL072C	PSF2		-3.6391	---
YJL155C	FBP26		-3.64842	---
YAL018C	---		-3.6487	---
YDR394W	RPT3		-3.66179	---
YAL056W	GPB2		-3.66449	---
YMR075W	RCO1		-3.66845	---
YBL085W	BOI1	1.5	-3.67092	---
YDR344C	YDR344C	2	-3.67131	---
YDR091C	RLI1	1	-3.67515	---
YPL060W	LPE10		-3.6824	---
YDR030C	RAD28		-3.68548	---
YER127W	LCP5		-3.69215	Boyer
YNL166C	BNI5		-3.69864	---
YDR002W	YRB1		-3.70093	---
YDR263C	DIN7		-3.71457	---
YDR155C	CPR1		-3.71945	---
YKL058W	TOA2		-3.72062	---
YEL023C	---		-3.72156	---
YPR196W	---		-3.7242	---
YOR297C	TIM18		-3.72725	---
YKL154W	SRP102	1	-3.73359	---
YDR503C	LPP1		-3.73543	---
YKL166C	TPK3	1	-3.73823	---
YER031C	YPT31	4	-3.74514	---
YOL163W	---		-3.75006	---
YJR111C	---		-3.76035	---
YOL043C	NTG2		-3.76876	---
YNL159C	ASI2		-3.78875	---
YGR033C	TIM21		-3.79608	---
YLR166C	SEC10		-3.80349	---
YLR372W	SUR4	2	-3.81115	---
YPL218W	SAR1		-3.81252	---
YPR193C	HPA2		-3.82209	---
YGR236C	SPG1		-3.83333	---
YCL029C	BIK1	1.5	-3.83709	---
YLR453C	RIF2	2	-3.84594	---
YFL047W	RGD2		-3.84757	---
YPL219W	PCL8		-3.85245	---
YNL057W	---		-3.8675	---
YOR367W	SCP1		-3.86954	---
YER119C	AVT6		-3.88664	---
YJR019C	TES1	4	-3.8943	---
YLR137W	---		-3.8981	---
YNL216W	RAP1	2	-3.89842	Boyer, YPD
YML122C	YML122C	4	-3.91221	---
YFL031W	HAC1	1.5	-3.92332	---
YBR280C	---		-3.92475	---
YLR249W	YEF3		-3.92663	---
YDR434W	GPI17		-3.9296	Boyer
YGR040W	KSS1		-3.93195	---
YPL174C	NIP100		-3.93414	---
YJR056C	---		-3.935	---
YJL116C	NCA3	1.5	-3.93574	---
YDR540C	---		-3.93897	---
YPL150W	---		-3.94019	---
YBL104C	---		-3.96599	---
YBR037C	SCO1		-3.9681	---
YPR026W	ATH1		-3.96992	---
YGL098W	USE1		-3.971	---
YHR033W	YHR033W	4	-3.97248	---
YLR467W	YRF1-5		-3.97344	---
YHR034C	PIH1		-3.98021	---
YJL065C	DLS1		-3.98223	---
YDR014W	RAD61		-3.98244	---
YLR009W	RLP24		-3.98921	---
YER094C	PUP3		-3.99141	---
YDR468C	TLG1	1	-3.9926	---
YPL233W	NSL1		-4.00396	---
YHR152W	SPO12		-4.00717	---
YLL016W	SDC25	2	-4.01959	---
YOR207C	RET1	3	-4.04848	---
YOR185C	GSP2	2	-4.05661	---
YNL020C	ARK1	1	-4.0586	---
YKL099C	UTP11		-4.06798	---
YER136W	GDI1		-4.07	---
YKR034W	DAL80		-4.07067	---
YPR183W	DPM1		-4.07184	---
YBL060W	---		-4.09572	---
YHL013C	---		-4.09732	---
YAL034C	FUN19	3	-4.09823	---
YGL176C	---		-4.103	---
YPL126W	---N1		-4.11797	Boyer
YPL155C	KIP2	1.5	-4.12794	---
YPL238C	---		-4.12859	---
YBR111C	YSA1		-4.13482	---
YNL307C	MCK1		-4.1412	---
YGL208W	SIP2		-4.15604	Boyer
YLR185W	RPL37A	2.5	-4.16297	---
YDR451C	YHP1	3	-4.16472	---
YKL117W	SBA1		-4.17728	---
YKR094C	RPL40B		-4.17933	---
YNL138W	SRV2		-4.2051	---
YGR199W	PMT6		-4.21615	---
YHR009C	---		-4.21769	---
YGL074C	---		-4.22001	---
YDR472W	TRS31		-4.22828	---
YJR089W	BIR1		-4.23873	Boyer
YLL061W	MMP1		-4.24066	---
YMR287C	MSU1		-4.24463	---
YGL114W	---		-4.26754	---
YMR270C	RRN9	3	-4.28239	Boyer
YBR156C	SLI15	2	-4.29228	---
YOR318C	---		-4.29375	---
YDL064W	UBC9		-4.29606	---
YNR003C	RPC34		-4.30342	---
YCR077C	PAT1	2.5	-4.30637	---
YBL039C	URA7		-4.30949	---
YPR187W	RPO26		-4.312	---
YGL106W	MLC1		-4.31746	---
YHL024W	RIM4	2.5	-4.32508	---
YKL065C	YET1		-4.33897	---
YKR028W	SAP190		-4.34111	---
YLR444C	---		-4.34209	---
YPR177C	YPR177C	1	-4.3481	---
YJL168C	SET2		-4.35331	---
YLR393W	ATP10		-4.35697	---
YOR131C	---		-4.35921	---
YBR188C	NTC20		-4.39181	---
YBR223C	TDP1		-4.40159	---
YER082C	UTP7		-4.40381	---
YDR379W	RGA2	3.5	-4.40763	---
YER059W	PCL6		-4.41334	---
YDR179W-A	YDR179W-A	1.5	-4.43377	Boyer
YLR093C	NYV1		-4.44013	---
YMR053C	STB2		-4.44492	---
YAL051W	OAF1		-4.45787	Boyer
YPR158W	---		-4.46309	---
YAL014C	SYN8		-4.46861	---
YHR057C	CPR2	1.5	-4.47408	---
YAR027W	UIP3		-4.49087	---
YAR033W	MST28		-4.49985	---
YJR143C	PMT4	3	-4.50158	---
YKR010C	TOF2		-4.5097	---
YHR097C	---		-4.51662	---
YDR508C	GNP1		-4.51718	---
YHL031C	GOS1	1.5	-4.52119	---
YKR075C	YKR075C	2	-4.53632	---
YOL056W	GPM3		-4.53746	---
YBR211C	AME1		-4.55836	---
YFR015C	GSY1		-4.56236	---
YLR079W	SIC1		-4.56238	Boyer
YPL070W	MUK1		-4.57857	---
YEL030W	ECM10		-4.58868	---
YLR340W	RPP0		-4.60175	---
YJR044C	VPS55		-4.61954	---
YBL057C	PTH2		-4.62664	---
YGR178C	PBP1		-4.62794	---
YGR203W	---		-4.63426	---
YNR049C	MSO1		-4.64011	---
YOR292C	---		-4.64529	---
YIL075C	RPN2		-4.64576	Boyer
YBR200W	BEM1		-4.64592	---
YPL123C	RNY1		-4.64794	---
YPR163C	TIF3		-4.6635	---
YMR030W	RSF1		-4.6646	---
YDR381W	YRA1		-4.66503	---
YLR174W	IDP2		-4.67779	---
YBR042C	---		-4.68126	---
YCL059C	KRR1		-4.70029	---
YBR131W	CCZ1	2.5	-4.70442	---
YOL122C	SMF1		-4.71722	Boyer
YOR233W	KIN4	1	-4.71744	---
YML093W	UTP14		-4.71959	---
YGR085C	RPL11B		-4.72117	---
YPR111W	DBF20	1	-4.72934	---
YGL010W	---		-4.73056	---
YPL220W	RPL1A	2.5	-4.73152	---
YPR037C	ERV2		-4.73867	---
YHR124W	NDT80		-4.74273	---
YNL227C	JJJ1		-4.7456	---
YNL193W	---		-4.74825	---
YDR405W	MRP20		-4.75975	---
YKL048C	ELM1		-4.76144	---
YBR076W	ECM8		-4.76277	---
YER060W	FCY21	1	-4.76581	---
YEL051W	VMA8		-4.76649	---
YPL189W	GUP2		-4.76902	---
YGR174C	CBP4	2.5	-4.77836	---
YNL181W	YNL181W	2	-4.78092	---
YMR116C	ASC1		-4.78899	---
YJL075C	---		-4.79771	---
YDL065C	PEX19		-4.8063	---
YDR296W	MHR1		-4.81325	---
YOL030W	GAS5		-4.81373	---
YOL078W	AVO1		-4.81825	---
YDL207W	GLE1	2.5	-4.81967	---
YHR131C	---		-4.82171	---
YKL187C	---		-4.83298	---
YLR350W	ORM2		-4.83429	---
YHR016C	YSC84		-4.86064	---
YGL031C	RPL24A	2	-4.87349	---
YKL109W	HAP4	2	-4.87809	---
YPR145W	ASN1		-4.88506	---
YNL320W	---		-4.88864	---
YJL148W	RPA34		-4.88994	---
YDL173W	YDL173W	3	-4.89921	---
YOL113W	SKM1		-4.90188	Boyer, YPD
YMR043W	MCM1		-4.9022	---
YCL048W	SPS22	2.5	-4.9049	---
YBL059W	YBL059W	2	-4.92277	---
YER093C-A	---		-4.92602	---
YMR124W	---		-4.93258	Boyer
YLL034C	RIX7		-4.9342	Boyer
YGR167W	CLC1	4	-4.94626	---
YPL190C	---B3	1.5	-4.95483	Boyer
YLR197W	SIK1		-4.95866	---
YLR332W	MID2		-4.96295	---
YPR114W	YPR114W	3.5	-4.98683	---
YML037C	---		-4.98702	---
YOR014W	RTS1		-4.98786	---
YGR268C	HUA1		-4.99372	---
YGL103W	RPL28		-5.00337	---
YPL193W	RSA1	2.5	-5.00968	---
YDR282C	---		-5.03112	---
YBR070C	ALG14		-5.05757	---
YER145C	FTR1		-5.06058	---
YPR030W	CSR2		-5.07301	Boyer
YBL093C	ROX3		-5.08307	---
YJL165C	HAL5		-5.10301	---
YOL110W	SHR5		-5.107	---
YDL183C	YDL183C	2	-5.10939	Boyer
YNL058C	---		-5.11133	Boyer
YPR125W	YPR125W	1	-5.12166	---
YGL160W	YGL160W	1.5	-5.13117	---
YBR025C	---		-5.13123	---
YAL059W	ECM1		-5.13765	---
YNL194C	YNL194C	3	-5.14656	---
YNR040W	---		-5.15073	---
YIR026C	YVH1		-5.16355	---
YGR038W	ORM1		-5.17117	---
YGR229C	SMI1		-5.18803	---
YML023C	NSE5		-5.20377	---
YML012W	ERV25		-5.20557	---
YJR014W	RBF22		-5.21692	---
YGL175C	SAE2		-5.23205	---
YLL031C	GPI13		-5.23369	---
YPL101W	ELP4		-5.23487	---
YNL187W	---		-5.25526	---
YER093C-A	---		-5.25754	---
YOR350C	MNE1		-5.28049	---
YOR025W	HST3		-5.29058	---
YMR233W	---		-5.30275	---
YMR268C	PRP24		-5.31152	---
YIL049W	DFG10		-5.31846	---
YLR192C	HCR1		-5.32465	---
YLR034C	SMF3		-5.32704	---
YDL202W	MRPL11		-5.33931	---
YNL080C	---		-5.34392	---
YER177W	BMH1		-5.34491	---
YLL005C	SPO75	3.5	-5.34503	---
YBR179C	FZO1	1.5	-5.35203	---
YIL071C	PCI8	3	-5.35257	---
YOR272W	YTM1	2	-5.35574	---
YOR357C	GRD19		-5.36757	---
YPL246C	RBD2	2.5	-5.3804	---
YLR385C	SWC7		-5.38699	---
YKL210W	UBA1		-5.38854	---
YJL058C	BIT61		-5.40492	---
YMR123W	PKR1		-5.40513	---
YOL092W	YOL092W	2.5	-5.41061	Boyer
YHL003C	LAG1		-5.41635	Boyer
YJL192C	SOP4		-5.41681	---
YJL064W	YJL064W	4	-5.42293	---
YGR129W	SYF2		-5.42588	---
YGR279C	SCW4		-5.43346	---
YPR152C	---		-5.44096	---
YJR093C	FIP1	2	-5.4449	---
YAR042W	SWH1		-5.50437	---
YLR374C	---		-5.50811	---
YHR123W	EPT1		-5.5115	---
YMR118C	---		-5.51761	---
YGL064C	MRH4		-5.52407	---
YLR075W	RPL10		-5.53259	---
YMR240C	CUS1		-5.5364	---
YDR395W	SXM1		-5.54128	Boyer
YGL259W	YPS5		-5.54152	---
YDL169C	UGX2		-5.55243	---
YOR342C	---		-5.55919	---
YHL028W	WSC4		-5.56145	---
YJR045C	SSC1		-5.56219	---
YER157W	COG3		-5.57372	---
YLR021W	---		-5.5756	---
YPR076W	---		-5.57656	---
YMR182C	RGM1	2	-5.59003	---
YML018C	---		-5.59213	---
YBR090C	---		-5.59359	---
YKL106W	AAT1		-5.59925	---
YHR067W	HTD2		-5.59945	Boyer
YER079W	---		-5.6062	---
YCL017C	NFS1		-5.60649	---
YKR060W	UTP30		-5.6221	---
YGR213C	RTA1		-5.62318	---
YJL118W	---		-5.62617	---
YBR001C	NTH2		-5.64097	---
YGR274C	TAF1		-5.64455	---
YDR086C	SSS1		-5.64716	---
YHR190W	ERG9	3.5	-5.65107	---
YDL188C	PPH22	3.5	-5.65454	Boyer, YPD
YOL053W	---		-5.65833	---
YNL313C	---		-5.66807	---
YOR372C	NDD1	2	-5.6685	---
YKR039W	GAP1	3.5	-5.6794	Boyer
YAR053W	---		-5.68359	---
YBL075C	SSA3		-5.69678	---
YGR183C	QCR9		-5.70451	---
YMR106C	YKU80		-5.72217	---
YKL114C	APN1		-5.72687	---
YNL112W	DBP2		-5.73599	---
YCR100C	YCR100C	3.5	-5.73672	---
YER039C	HVG1		-5.73697	Boyer
YBL047C	EDE1		-5.76323	---
YOR283W	---		-5.78327	---
YPL136W	---		-5.79705	---
YBL102W	SFT2	1	-5.79756	---
YMR309C	NIP1		-5.80261	---
YLL059C	---		-5.80435	---
YJL140W	RPB4		-5.80632	---
YLR223C	IFH1		-5.80962	---
YMR294W	JNM1		-5.8188	---
YIL118W	RHO3		-5.83401	---
YLR203C	MSS51		-5.83602	---
YGL257C	MNT2		-5.85088	---
YLL028W	TPO1	2.5	-5.85266	Boyer
YIL096C	---		-5.85345	---
YDR388W	RVS167		-5.85855	---
YGL020C	MDM39		-5.85908	---
YPL134C	ODC1	2.5	-5.86521	---
YKL220C	FRE2		-5.87036	---
YLR136C	TIS11		-5.8793	---
YHR140W	---		-5.89193	---
YIL136W	OM45		-5.89604	---
YPR065W	ROX1	1.5	-5.91707	---
YDL010W	---		-5.91969	---
YKL148C	SDH1		-5.92951	---
YDR130C	FIN1		-5.94314	---
YAL041W	CDC24		-5.95464	---
YDR200C	VPS64		-5.96676	---
YMR139W	RIM11		-5.96982	---
YFL040W	YFL040W	3	-5.97912	---
YIL037C	PRM2		-5.98082	---
YBL023C	MCM2		-5.99528	---
YER158C	---		-5.9987	---
YDR099W	BMH2		-6.01484	---
YDR033W	MRH1		-6.02236	---
YJR112W	NNF1		-6.02527	---
YHL009C	YAP3		-6.04296	---
YDL145C	COP1	2	-6.08943	---
YCR076C	---		-6.09683	Boyer
YPL038W	MET31	3.5	-6.11527	---
YIL073C	SPO22		-6.1546	Boyer
YKL033W	YKL033W	2	-6.17415	---
YLR229C	CDC42		-6.18857	---
YGR242W	---		-6.22458	---
YJL098W	SAP185		-6.23138	Boyer
YML065W	ORC1		-6.24989	Boyer, YPD
YPL112C	PEX25		-6.25193	---
YDL157C	---		-6.25358	---
YOR352W	---		-6.25997	---
YJL176C	SWI3	4	-6.26305	Boyer
YDR437W	GPI19		-6.26484	---
YOR219C	STE13		-6.26848	---
YNL183C	NPR1		-6.27159	---
YKR021W	---		-6.28489	---
YKL198C	PTK1		-6.30403	---
YMR197C	VTI1		-6.30538	---
YKR051W	---		-6.30797	---
YJR043C	POL32	2	-6.30827	---
YMR003W	---		-6.32523	---
YLR352W	YLR352W	2.5	-6.32528	---
YDR062W	LCB2		-6.33372	---
YOR288C	MPD1		-6.34077	---
YKL051W	SFK1		-6.34201	---
YDR524C	AGE1		-6.34575	---
YPR174C	---		-6.37077	Boyer
YKL057C	NUP120		-6.3728	Boyer
YBR028C	---		-6.38302	---
YNR007C	ATG3		-6.40307	---
YPL094C	SEC62		-6.41334	---
YDR087C	RRP1		-6.41843	---
YDL072C	YET3		-6.42103	---
YEL009C	GCN4	2	-6.44847	Boyer
YMR193W	MRPL24		-6.49591	---
YDR359C	VID21		-6.49995	---
YOR239W	ABP140		-6.52616	---
YJL203W	PRP21		-6.5394	---
YLR026C	SED5		-6.54754	---
YGR091W	PRP31		-6.55972	---
YJL127C	SPT10	1.5	-6.56005	---
YEL005C	VAB2	3	-6.57072	---
YER185W	---		-6.57733	---
YDL241W	---		-6.57992	---
YFR037C	RSC8		-6.59247	---
YLR016C	YLR016C	3.5	-6.59794	---
YGL035C	MIG1	4	-6.60265	---
YCL005W	---		-6.60916	---
YPL115C	BEM3		-6.61194	---
YOL112W	MSB4	2.5	-6.61323	---
YOL152W	FRE7		-6.62426	---
YPL084W	BRO1		-6.63139	---
YDR208W	MSS4	1.5	-6.64331	---
YER142C	MAG1	2.5	-6.64551	---
YJR060W	CBF1		-6.64572	---
YNL007C	SIS1		-6.6549	---
YGR290W	YGR290W	4	-6.65725	---
YNL258C	DSL1		-6.66971	---
YOR280C	FSH3		-6.69309	---
YGR161C	RTS3		-6.69415	---
YOR281C	PLP2	2	-6.69538	---
YPL182C	---		-6.69851	---
YIL046W	MET30		-6.7133	---
YKL022C	CDC16		-6.71715	---
YDR449C	UTP6		-6.71719	---
YDL189W	RBS1	3	-6.72012	---
YJR077C	MIR1	2.5	-6.74188	---
YPR113W	PIS1		-6.74341	---
YOR278W	HEM4	3.5	-6.77971	---
YLR426W	---		-6.78535	---
YCL025C	AGP1		-6.78931	---
YFL042C	---		-6.7905	---
YGL139W	YGL139W	3	-6.79549	---
YOL125W	---		-6.80709	---
YGR052W	FMP48		-6.81254	---
YCR094W	CDC50		-6.83168	---
YBL036C	---		-6.83309	---
YFR038W	---		-6.83375	---
YDR021W	FAL1		-6.84446	---
YDL194W	SNF3		-6.85038	---
YBR110W	ALG1		-6.85858	---
YJL097W	---		-6.86141	---
YDR318W	MCM21		-6.864	---
YAL009W	SPO7		-6.86668	---
YLR015W	BRE2		-6.87319	---
YOR065W	CYT1		-6.87539	---
YDR414C	ERD1		-6.88202	---
YBR117C	TKL2		-6.88556	---
YMR171C	---		-6.90203	---
YNL311C	YNL311C	2	-6.9154	---
YJL159W	HSP150		-6.96317	Boyer
YLR298C	YHC1		-6.9664	---
YOR062C	YOR062C	3	-6.97216	---
YHR187W	IKI1		-6.99108	---
YPR111W	DBF20	1	-6.99636	---
YNR015W	SMM1		-7.00375	---
YLR184W	---		-7.0117	---
YOL137W	BSC6		-7.01645	---
YOR058C	ASE1		-7.02043	---
YPL054W	LEE1	2	-7.02091	Boyer
YDL111C	RRP42		-7.02969	---
YNL322C	KRE1		-7.03599	---
YML110C	COQ5		-7.03795	---
YMR067C	UBX4		-7.03821	---
YDR247W	VHS1		-7.0552	---
YDR023W	SES1	2.5	-7.05993	---
YJL171C	---		-7.07118	---
YKL150W	MCR1		-7.07613	---
YMR187C	---		-7.08615	---
YKR071C	DRE2		-7.10247	---
YHR090C	YNG2		-7.10674	---
YOR256C	TRE2		-7.10933	---
YBR038W	CHS2		-7.1346	---
YMR277W	FCP1	1	-7.13568	---
YPL258C	THI21		-7.13998	---
YCR099C	YCR099C	4	-7.15749	---
YLR293C	GSP1	2.5	-7.1613	---
YLR423C	ATG17		-7.1681	---
YGR053C	---		-7.17651	---
YJR002W	MPP10		-7.20019	Boyer
YKL008C	LAC1		-7.20853	---
YOR061W	CKA2		-7.21252	---
YNL314W	DAL82		-7.21878	---
YJR065C	ARP3		-7.2217	---
YPR075C	OPY2	3	-7.23297	---
YPR139C	VPS66	4	-7.24158	---
YLL045C	RPL8B		-7.24456	---
YGL227W	VID30		-7.2617	---
YHR192W	---		-7.27333	---
YGR077C	PEX8	1.5	-7.27562	---
YMR200W	ROT1		-7.28117	---
YBR218C	PYC2		-7.28649	---
YLR315W	NKP2		-7.29781	---
YNR035C	ARC35		-7.30122	---
YPL241C	CIN2		-7.30285	---
YBR096W	---		-7.32214	---
YNR021W	---		-7.3238	Boyer
YPR058W	YMC1	1.5	-7.33791	---
YEL027W	CUP5	3.5	-7.34183	---
YAL038W	CDC19		-7.3423	---
YDR304C	CPR5	2.5	-7.36067	---
YDR206W	EBS1		-7.38986	---
YGL046W	---		-7.41079	---
YPL027W	SMA1		-7.41128	---
YLL054C	---		-7.41352	---
YNL065W	AQR1	2	-7.41391	---
YDR500C	RPL37B	3	-7.42642	---
YDR066C	---		-7.42791	---
YNR047W	---		-7.4373	---
YOR275C	RIM20		-7.44788	---
YNL180C	RHO5		-7.45409	---
YPL227C	ALG5		-7.47345	---
YBL037W	APL3		-7.48345	---
YMR147W	---		-7.48646	---
YFR005C	SAD1		-7.50123	---
YOL136C	PFK27		-7.51383	---
YOL003C	---		-7.51994	---
YDR085C	AFR1		-7.5682	---
YJL096W	MRPL49		-7.59596	Boyer
YLR214W	FRE1		-7.60495	Boyer
YER095W	RAD51		-7.61763	---
YNL272C	SEC2		-7.64824	---
YER120W	SCS2		-7.6664	---
YOR305W	---		-7.67086	---
YOR232W	MGE1		-7.68416	---
YBR165W	UBS1		-7.68948	---
YOR063W	RPL3		-7.70197	---
YOL148C	SPT20		-7.70399	Boyer
YKR063C	LAS1		-7.71997	---
YLR059C	REX2	1	-7.72726	---
YML113W	DAT1		-7.7319	---
YMR034C	YMR034C	3	-7.7455	---
YAL039C	CYC3		-7.75825	---
YGR049W	SCM4	2	-7.7745	---
YPL224C	MMT2		-7.78007	Boyer
YOL101C	IZH4		-7.81386	---
YBL003C	HTA2	1	-7.81809	---
YHR001W	OSH7		-7.83057	---
YDL231C	BRE4		-7.84034	---
YDR074W	TPS2		-7.85994	---
YPL052W	OAZ1		-7.86104	---
YGR235C	---		-7.86244	---
YLL035W	GRC3		-7.86447	---
YGR035C	---		-7.87413	---
YHR206W	SKN7	3	-7.88315	---
YGL200C	EMP24		-7.89272	---
YCR086W	CSM1		-7.8996	---
YOL019W	YOL019W	3.5	-7.90229	Boyer
YLR414C	YLR414C	3	-7.90723	---
YBR014C	YBR014C	4	-7.92905	---
YGR258C	RAD2	3.5	-7.9291	---
YER180C	ISC10		-7.94865	---
YLR029C	RPL15A		-7.96318	Boyer
YCR072C	---		-7.96766	---
YIL050W	PCL7		-7.96781	---
YKR062W	TFA2		-7.98364	---
YOL029C	---		-7.99534	---
YOL002C	IZH2		-8.00452	---
YMR146C	TIF34		-8.00796	---
YEL040W	UTR2		-8.01816	---
YBL010C	---		-8.03008	---
YNL073W	MSK1		-8.03533	---
YGR172C	YIP1	3.5	-8.03657	---
YGL055W	OLE1		-8.04358	---
YNL278W	CAF120		-8.05484	---
YIR001C	SGN1	2	-8.06826	---
YGL085W	---		-8.07604	---
YLR335W	NUP2		-8.1055	Boyer, YPD
YOR381W	FRE3	4	-8.10669	---
YMR013C	SEC59		-8.11619	---
YDL048C	STP4		-8.12724	---
YLR359W	ADE13		-8.14139	---
YIL110W	---		-8.16395	---
YPL098C	---		-8.16433	---
YDL139C	SCM3	4	-8.17851	---
YMR153W	NUP53	2.5	-8.19034	---
YML031W	NDC1	3	-8.19074	Boyer, YPD
YKL198C	PTK1		-8.19803	---
YDL226C	GCS1	2	-8.19996	---
YDR416W	SYF1	2	-8.2097	---
YPL140C	MKK2		-8.21559	---
YDR140W	MTQ2	3.5	-8.22527	---
YNL207W	RIO2		-8.22931	---
YFR022W	ROG3		-8.23406	---
YLR052W	IES3		-8.26409	---
YJL048C	UBX6		-8.2676	---
YGR150C	---		-8.29403	---
YLR094C	GIS3		-8.30347	---
YPL079W	RPL21B	1.5	-8.32268	---
YJR061W	---		-8.32392	---
YGR196C	FYV8		-8.32492	---
YML076C	WAR1		-8.32888	---
YPL247C	---		-8.32994	Boyer
YPL147W	PXA1		-8.35253	---
YCR075C	ERS1		-8.35771	---
YDL119C	YDL119C	3	-8.38375	Boyer
YGR132C	PHB1		-8.40224	---
YGL051W	MST27		-8.41478	---
YOL022C	---		-8.42714	---
YPL145C	KES1	4	-8.437	---
YMR288W	HSH155		-8.48713	Boyer
YKL177W	---		-8.54632	Boyer
YDR148C	KGD2	4	-8.58575	---
YOR266W	PNT1		-8.60202	---
YPR040W	TIP41	1	-8.6092	---
YKR079C	TRZ1		-8.61761	---
YDR363W	ESC2		-8.64744	---
YIL005W	EPS1		-8.65708	---
YKR055W	RHO4		-8.66156	---
YNL027W	CRZ1		-8.69404	Boyer
YJL051W	---		-8.69992	---
YPL176C	YPL176C	2.5	-8.70878	---
YOR362C	PRE10		-8.71644	---
YPL121C	MEI5		-8.7291	---
YIL158W	---		-8.74649	---
YOR389W	---		-8.78774	---
YNL238W	KEX2		-8.80063	---
YJR017C	ESS1	2	-8.80752	---
YPR149W	NCE102		-8.81063	---
YJL036W	SNX4		-8.82449	---
YGR168C	---		-8.83431	---
YDL047W	SIT4	3	-8.85047	---
YGL161C	YIP5		-8.88034	---
YNL317W	PFS2		-8.8876	Boyer
YGR257C	MTM1		-8.89659	---
YMR311C	GLC8		-8.90785	---
YBR154C	RPB5		-8.91081	---
YDR183W	PLP1		-8.91883	---
YFL022C	FRS2		-8.94798	---
YER088C	DOT6		-8.96078	---
YHR202W	---		-8.96833	---
YPL132W	COX11		-9.00926	---
YLR379W	---		-9.01143	---
YMR167W	MLH1		-9.03187	---
YDL176W	---		-9.0539	---
YOL147C	PEX11	4	-9.06748	---
YOR329C	SCD5	1	-9.08228	---
YNL165W	---		-9.08449	---
YKL113C	RAD27		-9.09741	---
YNR041C	COQ2		-9.10289	---
YBL067C	UBP13		-9.1089	---
YKR099W	BAS1		-9.12339	Boyer
YMR066W	SOV1		-9.12696	---
YIL045W	PIG2	2	-9.12847	Boyer
YDL018C	ERP3		-9.14766	---
YOR355W	GDS1	2	-9.14837	---
YMR015C	ERG5	2	-9.15832	---
YHR110W	ERP5		-9.16139	---
YPR092W	---		-9.17531	---
YPL137C	YPL137C	1	-9.17846	Boyer, Stevenson
YEL056W	HAT2		-9.19227	---
YPR171W	BSP1	2	-9.19452	---
YNL310C	ZIM17		-9.19663	---
YNL256W	FOL1	2	-9.21533	---
YPL232W	SSO1	2.5	-9.2217	---
YOL153C	---		-9.2255	---
YKL019W	RAM2		-9.25042	---
YCL067C	HMLALPHA2	1	-9.28466	Boyer
YKR098C	UBP11	4	-9.28908	---
YNL144C	---		-9.29153	---
YPL146C	NOP53		-9.32042	---
YOR173W	DCS2	3	-9.3264	---
YJR073C	OPI3		-9.3286	---
YJR144W	MGM101		-9.34436	---
YJR068W	RFC2		-9.39262	---
YFR021W	ATG18		-9.3936	---
YNR002C	FUN34		-9.39903	---
YBL007C	SLA1		-9.40285	Boyer, YPD
YKL171W	YKL171W	3	-9.40453	---
YKL176C	LST4		-9.43713	---
YPR029C	APL4		-9.44696	---
YLR309C	IMH1		-9.47226	---
YMR049C	ERB1		-9.47527	---
YNL085W	MKT1		-9.49257	---
YNL306W	MRPS18		-9.49809	---
YOR047C	STD1		-9.50619	---
YPL168W	---		-9.50751	---
YJL143W	TIM17	1.5	-9.51333	---
YHR028C	DAP2		-9.6184	---
YGL048C	RPT6		-9.6435	---
YDL056W	MBP1	1.5	-9.68014	---
YMR206W	---		-9.68528	---
YJL133W	MRS3		-9.69349	---
YIL061C	SNP1		-9.69461	---
YOR079C	ATX2	3.5	-9.70565	Boyer
YOR018W	ROD1		-9.7184	---
YPL138C	SPP1		-9.72329	---
YGL073W	HSF1	1	-9.73053	Boyer, Espinet
YKR048C	---P1		-9.77606	---
YPL236C	---		-9.87001	---
YNL118C	DCP2		-9.87631	---
YFL054C	---		-9.90727	---
YKL217W	JEN1	2.5	-9.91595	---
YAL042W	ERV46		-9.9334	---
YKL112W	ABF1	1	-9.9357	---
YGL255W	ZRT1		-9.94048	---
YDR410C	STE14		-9.95842	---
YDL182W	LYS20		-9.96022	---
YHR069C	RRP4		-9.98034	---
YLR056W	ERG3		-10.0067	---
YMR297W	PRC1		-10.0208	---
YDR433W	---		-10.0308	---
YLR221C	RSA3		-10.0331	---
YKR006C	MRPL13		-10.0558	---
YPR178W	PRP4		-10.0588	Boyer
YAL040C	CLN3		-10.0753	---
YBR071W	---		-10.0774	---
YER118C	SHO1		-10.0798	---
YLR080W	EMP46		-10.0835	---
YGR109C	CLB6		-10.0909	Boyer, YPD
YHR205W	SCH9		-10.0941	---
YLR368W	MDM30	2	-10.0996	---
YFL004W	VTC2		-10.1324	---
YMR086W	YMR086W	2	-10.1401	---
YGL245W	GUS1		-10.141	---
YHL044W	---		-10.1514	---
YIL047C	SYG1		-10.1612	---
YML066C	SMA2		-10.1631	---
YNL305C	YNL305C	3	-10.1839	Boyer
YMR083W	ADH3	3	-10.1923	---
YLR319C	BUD6		-10.2111	---
YHL025W	SNF6		-10.23	---
YLR326W	---		-10.2329	---
YOL093W	TRM10		-10.2427	---
YBL029W	---		-10.2482	---
YMR098C	---		-10.3018	---
YPL158C	---		-10.3028	---
YML048W	GSF2		-10.3078	---
YKL133C	YKL133C	2	-10.3586	---
YDR425W	SNX41	3	-10.359	Boyer
YPL173W	MRPL40		-10.3723	---
YPR165W	RHO1		-10.378	---
YNR061C	---		-10.4228	---
YDL223C	HBT1		-10.4494	---
YLR386W	VAC14		-10.462	---
YHL048W	COS8		-10.4685	---
YBR198C	TAF5		-10.5173	Boyer
YBR220C	---		-10.5256	---
YPL057C	SUR1		-10.5277	---
YJR141W	---		-10.5675	---
YGL181W	GTS1		-10.5953	---
YNL084C	END3		-10.6046	---
YPR035W	GLN1		-10.6287	---
YJL196C	ELO1	3	-10.6363	---
YHR094C	HXT1	2	-10.6433	---
YNR005C	---		-10.6812	---
YGL224C	SDT1		-10.6956	---
YDR436W	PPZ2		-10.7062	---
YLR210W	CLB4	2.5	-10.7246	---
YMR216C	SKY1		-10.7287	---
YBR172C	SMY2	3	-10.7331	---
YKL116C	PRR1		-10.7454	---
YJR030C	---		-10.7461	Boyer
YKR046C	PET10		-10.7497	---
YOR197W	MCA1		-10.7592	---
YNR060W	FRE4		-10.7894	---
YAL022C	FUN26	3	-10.8047	---
YDR184C	ATC1	4	-10.8059	---
YLR097C	HRT3	1	-10.8152	---
YDL082W	RPL13A	3.5	-10.823	---
YJR075W	HOC1		-10.8378	---
YKR078W	---		-10.849	---
YJR152W	DAL5	2.5	-10.8974	---
YNL199C	GCR2		-10.9022	Boyer
YGL125W	MET13		-10.9279	---
YOR228C	YOR228C	3	-10.9343	---
YFR023W	PES4	3.5	-10.956	---
YGL144C	ROG1		-10.9736	---
YER050C	RSM18		-10.9778	---
YLR005W	SSL1		-10.9845	Boyer
YHL033C	RPL8A		-11.0048	---
YGR157W	CHO2		-11.064	Boyer
YDR444W	---		-11.0931	---
YJL028W	---		-11.0984	---
YFL048C	EMP47		-11.1017	---
YMR100W	MUB1		-11.1029	---
YBL082C	ALG3		-11.1101	---
YOR335C	ALA1	3.5	-11.1149	Boyer
YGL244W	RTF1		-11.1312	---
YIL068C	SEC6		-11.1402	---
YMR319C	FET4		-11.1434	---
YDL025C	YDL025C	3	-11.1641	---
YDR480W	DIG2		-11.1798	---
YPL210C	SRP72		-11.1943	Boyer
YAL053W	YAL053W	2	-11.1969	---
YMR036C	MIH1		-11.1979	---
YOR190W	SPR1		-11.1983	---
YMR214W	SCJ1		-11.2067	---
YBR108W	---		-11.209	---
YPR072W	NOT5		-11.2312	---
YNL097C	PHO23	1.5	-11.2487	---
YNL206C	RTT106		-11.2493	---
YKL122C	SRP21		-11.2499	---
YLR191W	PEX13	2.5	-11.255	Boyer
YMR010W	---		-11.351	---
YCL051W	LRE1	4	-11.3866	---
YGR223C	HSV2		-11.3971	---
YOL123W	HRP1	1	-11.4111	Boyer
YOR231W	MKK1		-11.425	---
YGR110W	---		-11.4253	---
YJR013W	GPI14		-11.4383	---
YOR080W	DIA2		-11.4516	---
YMR026C	PEX12	3	-11.4636	---
YPL011C	TAF3		-11.4829	---
YLR375W	STP3	1	-11.4867	---
YDR522C	SPS2		-11.4988	---
YKL094W	YJU3		-11.5124	---
YBL106C	SRO77		-11.5602	---
YDL175C	AIR2		-11.5873	---
YIL006W	YIL006W	2	-11.6038	---
YBL038W	MRPL16		-11.608	---
YOL103W	ITR2		-11.6256	---
YFR024C-A	LSB3		-11.6518	---
YLR355C	ILV5		-11.6544	---
YML046W	PRP39		-11.6668	---
YLR003C	---		-11.6972	---
YDL115C	IWR1		-11.7011	---
YPR161C	SGV1	3	-11.7198	---
YPL110C	GDE1		-11.75	---
YDR496C	PUF6		-11.7548	---
YGL111W	NSA1		-11.806	---
YHR134W	WSS1		-11.8125	---
YPL153C	RAD53	2.5	-11.8188	---
YLL055W	YLL055W	2.5	-11.8275	---
YHR031C	RRM3	1.5	-11.8606	---
YEL050C	RML2		-11.8642	---
YDL177C	---		-11.903	---
YDL113C	ATG20		-11.9251	---
YBR102C	EXO84	4	-11.9833	---
YFL041W	FET5		-11.9891	Boyer
YOR060C	---		-11.9971	---
YLR141W	RRN5		-12.0118	---
YFR020W	---		-12.0268	---
YNL261W	ORC5		-12.0337	---
YNR056C	BIO5		-12.0557	---
YOR101W	RAS1		-12.0873	---
YER168C	CCA1		-12.1083	---
YGR044C	RME1	2	-12.1345	---
YJL061W	NUP82		-12.1597	Boyer
YDR456W	NHX1	2.5	-12.1727	---
YGL022W	STT3		-12.1778	---
YIR016W	---		-12.1837	---
YOR111W	---		-12.2353	---
YLR220W	CCC1	1	-12.2394	---
YDR204W	COQ4		-12.2401	---
YIL033C	BCY1		-12.2627	---
YLR047C	YLR047C	2.5	-12.2946	---
YJL023C	PET130		-12.3053	---
YGR106C	YGR106C	2.5	-12.314	Boyer
YLR025W	SNF7	4	-12.3291	---
YDR084C	TVP23	1.5	-12.3295	---
YDR489W	SLD5		-12.343	---
YKL204W	EAP1		-12.3514	---
YGR096W	TPC1	1.5	-12.3608	Boyer
YML125C	---		-12.3759	---
YOR066W	YOR066W	3	-12.3993	---
YGR224W	AZR1		-12.4178	---
YFL001W	DEG1		-12.4287	---
YGL137W	SEC27		-12.4498	---
YIL112W	HOS4		-12.4813	---
YBR075W	---		-12.485	---
YLR382C	---M2		-12.4889	---
YHL040C	ARN1	4	-12.4986	---
YNR030W	ALG12		-12.5053	---
YOR002W	ALG6		-12.52	---
YMR055C	BUB2		-12.5227	---
YGR066C	YGR066C	2.5	-12.5933	---
YKR092C	SRP40	1.5	-12.6113	---
YNR062C	---		-12.6348	---
YGR222W	PET54	4	-12.6402	---
YEL064C	AVT2	1.5	-12.6818	---
YLR205C	HMX1		-12.6839	Boyer
YNR048W	YNR048W	2	-12.6841	---
YGL025C	PGD1		-12.6949	---
YOR017W	PET127		-12.7019	---
YMR221C	FMP42		-12.7236	Boyer
YML019W	OST6		-12.7583	---
YNL115C	---		-12.7687	Boyer
YDL225W	SHS1	2.5	-12.7802	---
YGL066W	SGF73	2	-12.8601	---
YGR012W	---		-12.887	---
YLR102C	APC9	2.5	-12.9567	---
YHR078W	---		-12.9598	Boyer
YIL101C	XBP1	3.5	-12.9615	---
YMR088C	VBA1		-12.9757	---
YBR132C	AGP2		-12.9821	---
YDR337W	MRPS28		-12.9921	---
YML080W	DUS1		-13.0034	---
YER100W	UBC6		-13.0256	---
YMR262W	---		-13.0334	---
YDL156W	---		-13.055	Boyer
YIL135C	VHS2		-13.1136	---
YKL178C	STE3		-13.1165	---
YPR147C	---		-13.1435	---
YNL336W	COS1		-13.1467	Boyer
YGL076C	RPL7A		-13.1919	---
YML027W	YOX1	1.5	-13.2159	---
YGL219C	MDM34	2.5	-13.2606	---
YKL121W	---		-13.2609	---
YIL127C	---		-13.2625	---
YKR041W	---		-13.2693	---
YPR142C	---		-13.2847	---
YJR095W	SFC1	1	-13.2959	Boyer
YNL237W	YTP1		-13.2977	Boyer
YMR152W	YIM1		-13.3021	---
YMR237W	BCH1		-13.304	---
YDR440W	DOT1	2.5	-13.3252	---
YBR201W	DER1		-13.3302	---
YLR089C	ALT1		-13.3765	---
YJL033W	HCA4		-13.3838	---
YOL077C	BRX1		-13.3992	---
YDR320C	SWA2	3	-13.4156	---
YBR180W	DTR1	2.5	-13.5042	---
YPL086C	ELP3		-13.5135	---
YOR208W	PTP2		-13.5474	Boyer
YBR219C	---		-13.5995	---
YLR276C	DBP9		-13.6148	Boyer
YGL256W	ADH4	2	-13.6173	---
YDR233C	RTN1	1	-13.6232	---
YPL105C	---		-13.6327	---
YCL009C	ILV6		-13.6359	---
YPR093C	ASR1		-13.6388	---
YMR001C	CDC5	1	-13.6457	Boyer, YPD
YNR013C	PHO91		-13.6957	---
YOR036W	PEP12	3.5	-13.7308	Boyer
YCL057W	PRD1		-13.7324	---
YKL219W	COS9		-13.7354	---
YDR497C	ITR1	2	-13.7461	---
YFR034C	PHO4	2	-13.7504	---
YOR042W	CUE5		-13.7622	---
YOL132W	GAS4		-13.7686	---
YNL042W	BOP3		-13.7733	---
YBR078W	ECM33		-13.7891	---
YNL291C	MID1		-13.8101	---
YDR309C	GIC2	2	-13.839	---
YBR147W	---		-13.9074	---
YER141W	COX15		-13.9679	---
YBR158W	AMN1	1	-13.9695	Boyer
YJL030W	MAD2		-13.9789	---
YDR458C	YDR458C	2	-13.979	---
YIL166C	YIL166C	3	-13.9897	Boyer
YOR270C	VPH1		-14.0524	---
YMR202W	ERG2		-14.0779	Boyer, Stevenson
YLR411W	CTR3		-14.0869	---
YGL078C	DBP3	2.5	-14.0966	---
YML062C	MFT1		-14.1261	Boyer
YBR270C	BIT2		-14.1281	---
YBR283C	SSH1	4	-14.1314	---
YGR263C	---		-14.2003	---
YDR232W	HEM1		-14.2136	---
YOL095C	HMI1		-14.2394	Boyer
YPL254W	HFI1	2	-14.2806	---
YDR249C	YDR249C	2.5	-14.3321	---
YIL154C	IMP2'		-14.3402	---
YOR033C	EXO1		-14.3526	---
YOL007C	---		-14.3676	---
YBR063C	---		-14.4016	---
YDL017W	CDC7		-14.4301	---
YLR152C	YLR152C	3	-14.5393	---
YJR124C	YJR124C	3	-14.5424	---
YPR088C	SRP54		-14.5768	---
YLR081W	GAL2	3	-14.584	---
YKR017C	---		-14.5843	---
YOL060C	MAM3		-14.6201	---
YJR145C	RPS4A		-14.6221	---
YJL162C	JJJ2	2	-14.6264	---
YOR271C	YOR271C	1	-14.6302	---
YJL069C	UTP18	2.5	-14.684	Boyer
YDR316W	OMS1		-14.715	---
YBR085W	AAC3	1.5	-14.736	Boyer,Stevenson
YHR062C	RPP1		-14.7381	---
YPL093W	NOG1		-14.747	---
YDL022W	GPD1		-14.7631	---
YNL022C	---		-14.7666	---
YAR007C	RFA1		-14.7671	---
YNL047C	SLM2	2.5	-14.8013	---
YGL065C	ALG2		-14.8074	---
YBR294W	SUL1		-14.8099	---
YPR070W	MED1		-14.8229	---
YGL003C	CDH1		-14.8645	Boyer, Stevenson
YJL106W	IME2		-14.8727	---
YCL045C	---		-14.8822	---
YIL134W	FLX1	2	-14.8824	---
YGL163C	RAD54		-14.9037	---
YDR090C	---		-14.9577	---
YOR353C	SOG2		-14.9734	---
YLR314C	CDC3		-15.0436	---
YHR052W	CIC1		-15.0528	---
YHR114W	BZZ1		-15.0695	---
YPL151C	PRP46	2.5	-15.0716	---
YFR012W	---		-15.0777	---
YOR198C	BFR1		-15.0803	---
YGR062C	COX18		-15.0929	---
YNR034W	SOL1		-15.0948	---
YOR123C	LEO1		-15.1091	Boyer
YHR108W	GGA2		-15.117	---
YLR447C	VMA6		-15.1211	---
YMR102C	---		-15.1223	---
YML097C	VPS9		-15.2195	---
YMR253C	---		-15.2296	---
YOL124C	YOL124C	3.5	-15.2352	---
YCR008W	SAT4		-15.2698	---
YDL129W	YDL129W	3.5	-15.2821	---
YDR169C	STB3	2.5	-15.2839	---
YBR066C	NRG2		-15.3068	---
YKL062W	MSN4	3	-15.3127	---
YGR255C	COQ6		-15.3185	---
YNL066W	SUN4		-15.3344	---
YML119W	---		-15.3436	---
YDR284C	DPP1		-15.3854	---
YIL063C	YRB2		-15.4454	---
YDR521W	---		-15.4753	---
YHL047C	ARN2		-15.4872	Boyer
YER051W	---		-15.5683	---
YCR009C	RVS161		-15.5789	---
YJL164C	TPK1	1	-15.6401	---
YGR285C	ZUO1		-15.6517	---
YER133W	GLC7		-15.6648	---
YLR139C	SLS1		-15.665	---
YNL006W	LST8		-15.6715	---
YBL083C	---		-15.7161	---
YIL114C	POR2	4	-15.7186	Boyer
YCR044C	PER1	4	-15.724	Boyer
YGR060W	ERG25		-15.7288	---
YBR221C	PDB1		-15.7473	---
YDL206W	---		-15.7702	Boyer
YMR115W	FMP24		-15.7739	---
YKL093W	MBR1		-15.8446	---
YLR072W	---		-15.8605	---
YMR032W	HOF1	1	-15.8673	---
YBR182C	SMP1		-15.8681	---
YDR498C	SEC20		-15.8826	---
YCR049C	YCR049C	2.5	-15.9213	---
YLR182W	SWI6	2.5	-15.933	---
YGL013C	PDR1		-15.9409	---
YMR272C	SCS7		-15.9724	---
YJL037W	---		-15.9962	---
YHR181W	SVP26		-16.0257	---
YBR216C	YBP1	2	-16.036	---
YJR136C	---		-16.0485	---
YMR213W	CEF1		-16.0563	---
YLR113W	HOG1		-16.111	---
YGR216C	GPI1		-16.1778	---
YDL234C	GYP7		-16.1811	---
YAL028W	FRT2		-16.1934	---
YJL012C	VTC4		-16.1987	---
YLR243W	YLR243W	1	-16.2289	---
YPL156C	PRM4		-16.2313	---
YDL134C	PPH21	4	-16.2546	---
YDL218W	---		-16.2579	---
YFL002C	SPB4		-16.2841	---
YDR192C	NUP42	2.5	-16.2982	---
YMR137C	PSO2		-16.362	---
YHR076W	PTC7	1.5	-16.3638	---
YGR086C	PIL1		-16.4425	---
YOL091W	SPO21		-16.5301	---
YAL043C	PTA1		-16.5768	---
YKL050C	---		-16.5822	---
YER005W	YND1	1	-16.6005	---
YDR124W	---		-16.6772	---
YNL062C	GCD10		-16.7014	---
YGL028C	SCW11		-16.7243	---
YER027C	GAL83	3.5	-16.8374	---
YGL134W	PCL10		-16.8747	---
YIR038C	GTT1		-16.8845	---
YPR109W	---		-16.8985	---
YNR006W	VPS27	4	-16.9112	---
YGL076C	RPL7A		-16.9399	---
YLR218C	---		-16.982	---
YER161C	SPT2	3	-16.9875	---
YMR144W	---		-16.9875	---
YDR126W	SWF1		-16.9973	---
YLR212C	TUB4		-17.0455	---
YHR188C	GPI16	3	-17.0669	---
YNL094W	APP1	3	-17.0966	---
YNL095C	---		-17.1114	---
YJL117W	PHO86		-17.1423	---
YMR177W	MMT1		-17.1498	---
YNR055C	HOL1	4	-17.1692	Boyer
YMR290C	HAS1		-17.192	---
YHR117W	TOM71		-17.2242	---
YML115C	VAN1		-17.2456	---
YCR014C	POL4		-17.2989	---
YAR014C	BUD14	2.5	-17.3025	---
YGR084C	MRP13		-17.3268	---
YIL019W	FAF1		-17.3344	---
YGR142W	BTN2	3.5	-17.3584	---
YER053C	PIC2		-17.394	---
YDR312W	SSF2	2.5	-17.4305	---
YDR195W	REF2		-17.4356	---
YBR274W	CHK1	3.5	-17.5415	---
YDR262W	---		-17.5749	---
YMR089C	YTA12		-17.5819	---
YPR162C	ORC4		-17.6137	---
YMR011W	HXT2		-17.6553	Boyer
YDR052C	DBF4		-17.6716	---
YBR003W	COQ1	2.5	-17.6943	---
YCL046W	---		-17.7111	---
YAL010C	MDM10		-17.7822	---
YJL132W	---		-17.8245	---
YDR528W	HLR1		-17.8287	---
YIL103W	DPH1		-17.8325	---
YHR150W	PEX28		-17.8447	---
YMR155W	---		-17.889	Boyer
YGR145W	ENP2		-17.8981	Boyer
YLR343W	GAS2		-17.9062	---
YOR374W	ALD4		-17.9319	---
YMR168C	CEP3		-17.9325	---
YGR124W	ASN2		-17.9361	---
YPR083W	MDM36		-17.9515	---
YNL077W	APJ1		-17.9833	---
YFL055W	AGP3		-17.9999	---
YPR124W	CTR1	1	-18.0104	---
YBR227C	MCX1		-18.0228	---
YIL123W	SIM1		-18.0267	---
YLR265C	NEJ1		-18.0516	---
YDR367W	---		-18.0704	---
YBL087C	RPL23A		-18.0705	---
YBR185C	MBA1		-18.13	---
YBR146W	MRPS9	2	-18.1614	---
YEL065W	SIT1		-18.1677	---
YFR048W	RMD8		-18.1765	---
YNL253W	TEX1		-18.1811	---
YOL070C	---		-18.1821	---
YML021C	UNG1		-18.1985	---
YHR198C	FMP22		-18.203	---
YOR056C	NOB1		-18.2214	---
YPL104W	MSD1		-18.2554	---
YFL023W	BUD27	1.5	-18.3154	Boyer
YBR142W	MAK5	2.5	-18.3159	---
YOR037W	CYC2		-18.36	---
YBR232C	---		-18.3761	---
YIR021W	MRS1		-18.4063	---
YMR258C	---		-18.4196	---
YBR195C	MSI1	1.5	-18.4277	---
YBR054W	YRO2	2	-18.4555	---
YJL185C	YJL185C	3	-18.4585	---
YOL069W	NUF2		-18.4862	---
YOR049C	RSB1		-18.4956	---
YPL106C	SSE1		-18.509	---
YMR241W	YHM2	1.5	-18.5178	---
YOR204W	DED1		-18.5237	---
YOL083W	---		-18.5246	---
YKL155C	RSM22		-18.5415	---
YJL093C	TOK1		-18.5748	---
YER098W	UBP9		-18.5891	---
YJL062W	LAS21		-18.6054	---
YGL019W	CKB1		-18.6436	---
YGR121C	MEP1		-18.6519	---
YIL150C	MCM10	1.5	-18.6743	---
YJL110C	GZF3	3	-18.7022	---
YLR117C	CLF1	3.5	-18.7121	---
YER106W	MAM1	1	-18.7313	---
YDL155W	CLB3	1	-18.7323	---
YOR222W	ODC2		-18.7514	---
YGL113W	SLD3		-18.7959	---
YKL193C	SDS22		-18.8851	---
YEL032W	MCM3	2	-18.9293	---
YDR229W	IVY1		-18.94	---
YPR181C	SEC23	1.5	-18.9894	---
YOR133W	EFT1	2.5	-19.0259	---
YOR187W	TUF1		-19.0446	---
YOR196C	LIP5		-19.058	---
YNL031C	HHT2	2.5	-19.064	---
YJL108C	PRM10		-19.0658	---
YNL004W	HRB1		-19.0787	---
YJR051W	OSM1		-19.1623	---
YNL176C	---		-19.1674	---
YLR150W	STM1		-19.22	---
YMR212C	EFR3		-19.2358	---
YGR280C	PXR1	3	-19.2373	Boyer
YDR279W	RNH202		-19.3433	---
YPR011C	YPR011C	2.5	-19.3677	---
YOR246C	---		-19.3962	---
YLR135W	SLX4	2.5	-19.4965	---
YGL189C	RPS26A	1	-19.5049	---
YNR032W	PPG1	2	-19.5195	---
YGR276C	RNH70		-19.5512	---
YJR100C	---		-19.5685	---
YJL031C	BET4		-19.582	---
YBL030C	PET9	1.5	-19.6284	---
YML067C	ERV41		-19.6398	---
YNL103W	MET4	3	-19.6411	---
YIL091C	---		-19.7414	---
YHR184W	SSP1		-19.7444	---
YLR427W	MAG2		-19.7514	---
YDR161W	---		-19.8654	---
YDR105C	TMS1		-19.8922	---
YOR245C	DGA1		-19.9079	---
YPL249C	GYP5		-20.1023	---
YDL128W	VCX1		-20.1309	---
YBR005W	RCR1		-20.158	---
YOL033W	MSE1		-20.174	---
YPR140W	TAZ1		-20.1854	---
YIL131C	FKH1		-20.19	---
YER140W	---		-20.2105	---
YPL244C	HUT1		-20.2246	---
YMR081C	ISF1		-20.227	---
YOR386W	PHR1	2.5	-20.2568	---
YNL225C	CNM67	2.5	-20.3723	---
YHL048W	COS8		-20.3734	---
YLR049C	---		-20.3783	---
YKR005C	---		-20.3842	---
YNL175C	NOP13		-20.4493	---
YHL036W	MUP3	4	-20.4813	Boyer
YAL063C	FLO9		-20.4853	Boyer
YDR439W	LRS4		-20.4871	---
YMR291W	---		-20.5857	---
YBR024W	SCO2	1	-20.6639	---
YPR054W	SMK1		-20.8686	---
YJR125C	ENT3		-20.8938	---
YJR076C	CDC11	3	-20.9055	---
YKL046C	DCW1	3.5	-20.9102	---
YPR185W	ATG13	2	-20.9156	---
YGR101W	PCP1		-21.0272	---
YNL212W	VID27		-21.0366	---
YJL193W	---		-21.0381	---
YLR196W	PWP1	1.5	-21.1531	Boyer
YBR204C	---		-21.1567	---
YHR115C	DMA1	1.5	-21.1843	---
YJR126C	VPS70	3	-21.2186	---
YGR266W	---		-21.2271	Boyer
YCR096C	HMRA2	1	-21.2387	---
YNL323W	LEM3		-21.2527	---
YDL214C	PRR2		-21.2691	---
YPR091C	---		-21.2765	---
YNL239W	LAP3	3.5	-21.2902	---
YAL011W	SWC3		-21.3049	Boyer
YHL010C	---		-21.3075	Boyer
YGR120C	COG2		-21.3148	---
YIL078W	THS1		-21.4106	---
YOR085W	OST3		-21.4504	---
YHR133C	NSG1	4	-21.4676	---
YHR006W	STP2	2	-21.4813	---
YDL066W	IDP1		-21.5018	---
YPL019C	VTC3	4	-21.5926	---
YOR321W	PMT3		-21.6179	---
YLR153C	ACS2		-21.6318	---
YDR485C	VPS72		-21.7247	Boyer
YKR044W	UIP5		-21.7276	---
YLL018C	DPS1		-21.74	---
YGL207W	SPT16		-21.8208	---
YPL023C	MET12		-21.8525	---
YNL279W	PRM1	1.5	-21.879	---
YLR378C	SEC61		-21.8885	Boyer
YGL146C	---		-21.9267	---
YJL115W	ASF1		-21.9439	---
YGR100W	MDR1	2	-22.0342	---
YKR088C	TVP38		-22.04	---
YBR090C	---		-22.0551	---
YHR004C	NEM1		-22.1626	---
YGR169C	PUS6		-22.2017	---
YHR142W	CHS7		-22.2111	---
YKL135C	APL2		-22.222	Boyer
YOL015W	YOL015W	4	-22.2802	---
YNL219C	ALG9		-22.3028	Boyer
YGR249W	MGA1	3.5	-22.318	---
YBR021W	FUR4	3	-22.3421	Boyer
YBR231C	SWC5		-22.4105	---
YLR459W	GAB1		-22.4122	---
YDL049C	KNH1		-22.4493	---
YOR340C	RPA43		-22.5002	---
YDR419W	RAD30		-22.623	---
YLR219W	MSC3		-22.6231	---
YBR092C	PHO3		-22.6421	---
YPR156C	TPO3		-22.6479	---
YER125W	RSP5	1.5	-22.7777	---
YJL194W	CDC6		-22.7801	---
YOR310C	NOP58		-22.8203	---
YOR390W	YOR390W	1.5	-22.8625	---
YMR301C	ATM1		-22.9645	---
YLR443W	ECM7		-22.9713	---
YGR252W	GCN5		-22.9802	Boyer, YPD
YBR160W	CDC28		-23.0418	---
YPL018W	CTF19		-23.0766	---
YKL005C	BYE1	2	-23.0964	---
YNL104C	LEU4		-23.1328	---
YPR159W	KRE6		-23.2837	---
YDL204W	RTN2		-23.3073	---
YOR134W	BAG7		-23.3742	---
YDL190C	UFD2		-23.4173	---
YMR110C	---		-23.4532	Boyer
YDR312W	SSF2	2.5	-23.5563	---
YCL044C	---		-23.6093	---
YNL186W	UBP10	3.5	-23.6306	---
YHR194W	MDM31		-23.6976	---
YEL042W	GDA1		-23.8093	---
YOR071C	---		-23.8129	---
YLR401C	DUS3		-23.8472	---
YNL280C	ERG24		-23.8897	---
YBR138C	YBR138C	3	-23.979	---
YNL029C	KTR5		-24.041	---
YIL153W	RRD1		-24.0627	---
YLR246W	ERF2		-24.1063	---
YMR201C	RAD14		-24.2438	---
YGL093W	SPC105		-24.2993	---
YGL077C	HNM1	2.5	-24.3494	---
YER006W	NUG1		-24.3649	---
YLR248W	RCK2		-24.5054	---
YDR488C	PAC11		-24.707	Boyer
YDL024C	DIA3		-24.7169	---
YER089C	PTC2		-24.7432	---
YDL193W	---		-24.7747	---
YGR130C	---		-24.9207	---
YGR141W	VPS62		-24.9671	---
YMR014W	BUD22		-25.0237	---
YKR077W	---		-25.0739	---
YNL221C	POP1		-25.0985	---
YEL006W	---		-25.1071	---
YML074C	FPR3		-25.1297	---
YHR030C	SLT2		-25.1517	---
YLR190W	MMR1		-25.1669	---
YOL020W	TAT2		-25.1792	Boyer
YMR111C	YMR111C	2	-25.3285	---
YKR030W	GMH1	2	-25.4223	---
YPL264C	---		-25.5267	---
YML088W	UFO1		-25.5825	---
YGL104C	VPS73		-25.6448	---
YJL078C	PRY3		-25.6457	Boyer
YEL036C	ANP1	3	-25.6476	---
YHR161C	YAP1801	1.5	-25.6589	---
YOR193W	PEX27		-25.6663	---
YNR001C	CIT1	2.5	-25.6676	Boyer, YPD
YKL095W	YJU2		-25.7338	---
YKL064W	MNR2		-25.9302	---
YKL073W	LHS1		-25.9811	---
YHR195W	NVJ1	3	-26.1561	---
YKL179C	COY1	2.5	-26.1772	---
YDR235W	PRP42		-26.1784	---
YLR403W	SFP1	1	-26.2201	---
YNL005C	MRP7		-26.2878	---
YOL018C	TLG2		-26.2942	---
YBL032W	HEK2	2	-26.3472	Boyer
YIL076W	SEC28		-26.4029	---
YAL032C	PRP45	3	-26.4145	---
YKL157W	APE2	2	-26.4254	---
YKL080W	VMA5		-26.481	---
YOL115W	PAP2		-26.5517	---
YJL020C	BBC1		-26.5557	---
YDR311W	TFB1	2.5	-26.667	---
YIL036W	CST6	1.5	-26.6947	---
YHR045W	---		-26.707	---
YKL105C	---		-26.9081	---
YHR002W	LEU5		-26.9989	---
YKL012W	PRP40		-27.0667	---
YPL194W	DDC1		-27.2102	---
YNL315C	ATP11		-27.2172	---
YER096W	SHC1	4	-27.3078	---
YDR534C	FIT1		-27.4076	---
YCL027W	FUS1		-27.4258	---
YIL120W	QDR1		-27.4803	Boyer
YKL120W	OAC1	1.5	-27.6255	---
YLR404W	---		-27.6728	---
YLL010C	PSR1		-27.6891	---
YDR167W	TAF10		-27.72	---
YDR244W	PEX5	4	-27.7482	---
YNL071W	LAT1		-27.8531	---
YLR433C	C---1		-27.9571	Boyer
YLR188W	MDL1		-27.9668	---
YIL146C	ECM37	2.5	-27.9728	---
YNL032W	SIW14	3.5	-28.0257	---
YLR238W	FAR10		-28.0533	---
YGL172W	NUP49		-28.1171	---
YPL265W	DIP5		-28.1595	---
YPL243W	SRP68	3.5	-28.1894	---
YOR046C	DBP5		-28.2454	---
YGL190C	CDC55		-28.2476	---
YKL043W	PHD1		-28.2643	---
YOL044W	PEX15		-28.3711	---
YGL038C	OCH1		-28.7241	---
YPL083C	SEN54		-28.9194	---
YPR079W	MRL1		-29.1593	---
YAL023C	PMT2		-29.1791	Boyer
YDR515W	SLF1	2.5	-29.183	---
YDR123C	INO2	1	-29.1923	---
YHR032W	---		-29.2045	---
YGL122C	---B2	3	-29.2754	---
YBR212W	NGR1		-29.3428	---
YER001W	MNN1		-29.408	---
YDR314C	---		-29.4905	---
YLR300W	EXG1		-29.6116	---
YKL126W	YPK1	3	-29.6436	---
YNL294C	RIM21	3	-29.6816	---
YER048C	CAJ1		-29.7164	Boyer, Stevenson
YHL016C	DUR3		-29.7285	---
YBR045C	GIP1		-29.7371	---
YMR281W	GPI12		-29.755	---
YNL309W	STB1		-29.9772	---
YCR016W	---		-29.9936	---
[truncated: 382 more rows]
